# Supplementary material for: Global Analysis of Gene Expression Profiles in Developing Physic Nut (Jatropha curcas L.) Seeds
Source: PLoS One. 2012 May 4;7(5):e36522. doi: 10.1371/journal.pone.0036522 (PMC3344900; doi:10.1371/journal.pone.0036522)
Supplement: Table S1 — Summary of statistical analysis of expression patterns of genes that were differentially expressed during physic nut seed development. (XLS) [file pone.0036522.s008.xls]

## Sheet: Total
Table S1. Summary of statistical analysis of expression patterns of genes that were differentially expressed during physic nut seed development.
This table provides information on expression patterns of 11,412 genes (expression level changed over 4-fold in at least one stage) in developing physic nut seeds, aged between 14 and 45 days after pollination.
							Cluster	Name	Description
							7	JC_C100000003	Cytochrome P450
							1	JC_C100000004	-
							8	JC_C100000007	Oxoglutarate/iron-dependent oxygenase
							4	JC_C100000008	NAD(P)-binding domain
							7	JC_C100000012	Gamma interferon inducible lysosomal thiol reductase GILT
							7	JC_C100000014	Arf GTPase activating protein
							8	JC_C100000017	GTP-binding protein, HSR1-related IPR006169; GTP1/OBG subdomain IPR015349; GTP-binding protein GTP1/OBG, C-terminal
							0	JC_C100000020	-
							2	JC_C100000027	Heat shock protein DnaJ, N-terminal IPR002939; Chaperone DnaJ, C-terminal IPR008971; HSP40/DnaJ peptide-binding
							3	JC_C100000028	GO:0043231//intracellular membrane-bounded organelle
							6	JC_C100000030	Protein of unknown function DUF599
							1	JC_C100000032	Phosphatidylinositol-4-phosphate 5-kinase, core IPR003409; MORN motif IPR016034; Phosphatidylinositol-4-phosphate 5-kinase, core, subgroup
							0	JC_C100000035	Mitochondrial glycoprotein
							8	JC_C100000041	SANT, DNA-binding IPR009057; Homeodomain-like IPR014778; Myb, DNA-binding IPR017930; Myb-type HTH DNA-binding domain
							1	JC_C100000043	Oligopeptide transporter OPT superfamily
							8	JC_C100000047	Peptidase C12, ubiquitin carboxyl-terminal hydrolase 1
							6	JC_C100000051	-
							4	JC_C100000053	Zinc finger, RING-type
							5	JC_C100000064	Oxoglutarate/iron-dependent oxygenase
							8	JC_C100000066	Mannose-binding lectin
							0	JC_C100000070	Protein kinase, catalytic domain IPR002290; Serine/threonine-protein kinase domain IPR011009; Protein kinase-like domain IPR017442; Serine/threonine-protein kinase-like domain IPR020635; Tyrosine-protein kinase, subgroup, catalytic domain
							1	JC_C100000090	HAD-superfamily hydrolase, subfamily IE
							2	JC_C100000093	-
							8	JC_C100000098	Armadillo-type fold
							4	JC_C100000114	Uricase
							1	JC_C100000116	-
							0	JC_C100000120	HEAT IPR016024; Armadillo-type fold
							7	JC_C100000125	Protein kinase, catalytic domain IPR002290; Serine/threonine-protein kinase domain IPR011009; Protein kinase-like domain IPR017442; Serine/threonine-protein kinase-like domain IPR020635; Tyrosine-protein kinase, subgroup, catalytic domain
							2	JC_C100000129	Thioredoxin-like fold IPR013766; Thioredoxin domain IPR017936; Thioredoxin-like
							1	JC_C100000134	WD40 repeat IPR011046; WD40 repeat-like-containing domain IPR017986; WD40-repeat-containing domain IPR019781; WD40 repeat, subgroup IPR019782; WD40 repeat 2
							3	JC_C100000137	-
							1	JC_C100000145	GTP-binding protein, HSR1-related
							1	JC_C100000149	Transcription factor, FAR1-related IPR006564; Zinc finger, PMZ-type IPR007527; Zinc finger, SWIM-type IPR018289; MULE transposase, conserved domain
							6	JC_C100000153	Calponin-like actin-binding IPR016146; Calponin-homology
							4	JC_C100000155	-
							8	JC_C100000165	Dynamin, GTPase region
							4	JC_C100000167	-
							1	JC_C100000176	-
							4	JC_C100000179	Protein kinase, catalytic domain IPR002290; Serine/threonine-protein kinase domain IPR006016; UspA IPR011009; Protein kinase-like domain IPR017442; Serine/threonine-protein kinase-like domain IPR020635; Tyrosine-protein kinase, subgroup, catalytic domain
							1	JC_C100000186	Glycoside hydrolase, family 3, N-terminal IPR002772; Glycoside hydrolase, family 3, C-terminal IPR017853; Glycoside hydrolase, catalytic core
							6	JC_C100000187	Protein of unknown function DUF1092
							0	JC_C100000189	Acetohydroxy acid isomeroreductase C-terminal IPR008927; 6-phosphogluconate dehydrogenase, C-terminal-like IPR013116; Acetohydroxy acid isomeroreductase, catalytic IPR016040; NAD(P)-binding domain
							7	JC_C100000202	Zinc finger, PHD-type IPR003121; SWIB/MDM2 domain IPR004343; Plus-3 IPR011011; Zinc finger, FYVE/PHD-type IPR018144; Plus-3 domain, subgroup
							1	JC_C100000205	Basic helix-loop-helix dimerisation region bHLH IPR011598; Helix-loop-helix DNA-binding
							5	JC_C100000207	NUDIX hydrolase domain IPR015797; NUDIX hydrolase domain-like
							0	JC_C100000210	Pyridoxal phosphate-dependent enzyme, beta subunit
							1	JC_C100000219	Basic helix-loop-helix dimerisation region bHLH
							4	JC_C100000224	Pleckstrin homology IPR002913; Lipid-binding START IPR009769; Protein of unknown function DUF1336
							2	JC_C100000227	Tubulin/FtsZ, GTPase domain IPR008280; Tubulin/FtsZ, C-terminal IPR018316; Tubulin/FtsZ, 2-layer sandwich domain IPR019746; Tubulin/FtsZ, N-terminal
							1	JC_C100000229	GDP-fucose protein O-fucosyltransferase
							4	JC_C100000235	Pentatricopeptide repeat
							7	JC_C100000242	DNA repair metallo-beta-lactamase
							2	JC_C100000249	AIG1
							7	JC_C100000253	Phospholipase C, phosphatidylinositol-specific , X region IPR017946; PLC-like phosphodiesterase, TIM beta/alpha-barrel domain
							1	JC_C100000255	Pentatricopeptide repeat
							1	JC_C100000259	-
							1	JC_C100000262	U box domain
							7	JC_C100000266	CMP/dCMP deaminase, zinc-binding IPR016193; Cytidine deaminase-like
							8	JC_C100000269	Pentatricopeptide repeat
							8	JC_C100000273	RNA polymerase II, large subunit, CTD IPR006903; Protein of unknown function DUF618 IPR008942; ENTH/VHS
							4	JC_C100000276	-
							1	JC_C100000278	Zinc finger, LSD1-type
							3	JC_C100000280	Auxin efflux carrier
							4	JC_C100000284	Protein of unknown function DUF250
							8	JC_C100000285	X8
							5	JC_C100000291	GO:0043231//intracellular membrane-bounded organelle
							4	JC_C100000294	Phosphoglycerate mutase
							2	JC_C100000299	WD40 repeat IPR011046; WD40 repeat-like-containing domain IPR017986; WD40-repeat-containing domain IPR019781; WD40 repeat, subgroup IPR019782; WD40 repeat 2
							4	JC_C100000303	Photosystem II oxygen evolving complex protein PsbQ
							4	JC_C100000307	Cellular retinaldehyde-binding/triple function, C-terminal IPR008273; Cellular retinaldehyde-binding/triple function, N-terminal IPR011074; Phosphatidylinositol transfer protein-like, N-terminal
							8	JC_C100000309	-
							2	JC_C100000311	Glycoside hydrolase, family 3, N-terminal IPR002772; Glycoside hydrolase, family 3, C-terminal IPR017853; Glycoside hydrolase, catalytic core
							8	JC_C100000313	Glycoside hydrolase, family 3, N-terminal IPR002772; Glycoside hydrolase, family 3, C-terminal IPR017853; Glycoside hydrolase, catalytic core
							3	JC_C100000325	Glycoside hydrolase, family 35 IPR008979; Galactose-binding like IPR017853; Glycoside hydrolase, catalytic core
							4	JC_C100000327	-
							2	JC_C100000332	Inorganic pyrophosphatase
							4	JC_C100000341	Alpha/beta hydrolase fold-1
							8	JC_C100000344	X8
							4	JC_C100000350	Clathrin adaptor, mu subunit, C-terminal IPR011012; Longin-like
							4	JC_C100000355	Peptidase C19, ubiquitin carboxyl-terminal hydrolase 2 IPR006615; Peptidase C19, ubiquitin-specific peptidase, DUSP domain IPR010460; Ubiquitin carboxyl-terminal hydrolase, N-terminal region-2
							4	JC_C100000360	TRAM/LAG1/CLN8 homology domain
							8	JC_C100000365	SET IPR001965; Zinc finger, PHD-type IPR011011; Zinc finger, FYVE/PHD-type IPR019787; Zinc finger, PHD-finger
							8	JC_C100000367	IQ calmodulin-binding region
							8	JC_C100000369	TRAF-like IPR013010; Zinc finger, SIAH-type IPR018121; Seven in absentia protein, TRAF-like domain
							4	JC_C100000372	ATPase, AAA+ type, core IPR013093; ATPase associated with various cellular activities, AAA-2 IPR019489; Clp ATPase, C-terminal
							4	JC_C100000380	-
							0	JC_C100000386	Carbohydrate kinase, FGGY, N-terminal IPR018485; Carbohydrate kinase, FGGY, C-terminal
							1	JC_C100000394	Aminotransferase class-III IPR015424; Pyridoxal phosphate-dependent transferase, major region
							7	JC_C100000397	-
							2	JC_C100000399	NUDIX hydrolase domain IPR015797; NUDIX hydrolase domain-like
							0	JC_C100000401	GO:0031224//intrinsic to membrane;GO:0009534//chloroplast thylakoid
							4	JC_C100000405	SAC3/GANP/Nin1/mts3/eIF-3 p25
							1	JC_C100000413	Kinesin, motor region
							0	JC_C100000421	-
							4	JC_C100000423	Protein of unknown function DUF572
							4	JC_C100000429	Protein kinase, catalytic domain IPR001611; Leucine-rich repeat IPR002290; Serine/threonine-protein kinase domain IPR011009; Protein kinase-like domain IPR013210; Leucine-rich repeat, N-terminal IPR017442; Serine/threonine-protein kinase-like domain IPR020635; Tyrosine-protein kinase, subgroup, catalytic domain
							4	JC_C100000438	Peptidase C19, ubiquitin carboxyl-terminal hydrolase 2 IPR006615; Peptidase C19, ubiquitin-specific peptidase, DUSP domain IPR019955; Ubiquitin supergroup
							1	JC_C100000439	SRR1
							7	JC_C100000448	DNA-binding WRKY
							4	JC_C100000450	Protein kinase, catalytic domain IPR000858; S-locus glycoprotein IPR001480; Curculin-like (mannose-binding) lectin IPR002290; Serine/threonine-protein kinase domain IPR011009; Protein kinase-like domain IPR013227; PAN-2 domain IPR017442; Serine/threonine-protein kinase-like domain IPR020635; Tyrosine-protein kinase, subgroup, catalytic domain
							1	JC_C100000454	Leucine-rich repeat IPR011713; Leucine-rich repeat 3
							7	JC_C100000455	Toll-Interleukin receptor IPR002182; NB-ARC
							1	JC_C100000458	FAD dependent oxidoreductase
							4	JC_C100000460	NUDIX hydrolase domain IPR015797; NUDIX hydrolase domain-like
							1	JC_C100000466	Tetratricopeptide TPR-1 IPR012336; Thioredoxin-like fold IPR013026; Tetratricopeptide region IPR013105; Tetratricopeptide TPR2 IPR013766; Thioredoxin domain IPR019734; Tetratricopeptide repeat
							6	JC_C100000468	GRAS transcription factor
							5	JC_C100000471	Exostosin-like
							0	JC_C100000473	Exostosin-like
							1	JC_C100000485	Harpin-induced 1
							7	JC_C100000487	-
							8	JC_C100000497	GO:0043231//intracellular membrane-bounded organelle
							0	JC_C100000498	Protein kinase, catalytic domain IPR001611; Leucine-rich repeat IPR002290; Serine/threonine-protein kinase domain IPR003591; Leucine-rich repeat, typical subtype IPR011009; Protein kinase-like domain IPR013210; Leucine-rich repeat, N-terminal IPR017442; Serine/threonine-protein kinase-like domain IPR020635; Tyrosine-protein kinase, subgroup, catalytic domain
							0	JC_C100000500	WRC IPR014978; Glutamine-Leucine-Glutamine, QLQ
							4	JC_C100000501	GO:0043231//intracellular membrane-bounded organelle
							4	JC_C100000505	RNA recognition motif, RNP-1 IPR002885; Pentatricopeptide repeat
							3	JC_C100000512	Ubiquitin IPR002906; Ribosomal protein S27a IPR019955; Ubiquitin supergroup
							3	JC_C100000514	No apical meristem (NAM) protein
							2	JC_C100000521	Zinc finger, RING-type IPR003347; Transcription factor jumonji/aspartyl beta-hydroxylase IPR013129; Transcription factor jumonji IPR017956; AT hook, DNA-binding motif
							1	JC_C100000531	Peptidase A1 IPR009007; Peptidase aspartic, catalytic
							0	JC_C100000542	Argonaute/Dicer protein, PAZ IPR003165; Stem cell self-renewal protein Piwi IPR012337; Polynucleotidyl transferase, ribonuclease H fold IPR014811; Domain of unknown function DUF1785
							8	JC_C100000544	Multicopper oxidase, type 1 IPR008972; Cupredoxin IPR011706; Multicopper oxidase, type 2 IPR011707; Multicopper oxidase, type 3
							4	JC_C100000550	Smr protein/MutS2 C-terminal IPR013899; Domain of unknown function DUF1771
							7	JC_C100000551	SANT, DNA-binding IPR009057; Homeodomain-like IPR014778; Myb, DNA-binding IPR017930; Myb-type HTH DNA-binding domain
							1	JC_C100000553	Transcription factor, FAR1-related IPR006564; Zinc finger, PMZ-type IPR007527; Zinc finger, SWIM-type IPR018289; MULE transposase, conserved domain
							1	JC_C100000558	Heat shock protein 70
							4	JC_C100000562	Ran GTPase IPR003577; Ras small GTPase, Ras type IPR003578; Ras small GTPase, Rho type IPR003579; Ras small GTPase, Rab type IPR006688; ADP-ribosylation factor IPR013753; Ras
							4	JC_C100000564	GO:0043231//intracellular membrane-bounded organelle
							1	JC_C100000569	-
							4	JC_C100000588	ATP-binding region, ATPase-like IPR013507; DNA mismatch repair protein, C-terminal IPR020568; Ribosomal protein S5 domain 2-type fold
							1	JC_C100000592	Zinc finger, RING-type IPR010652; Protein of unknown function DUF1232 IPR018957; Zinc finger, C3HC4 RING-type
							0	JC_C100000599	Peptidase A1 IPR009007; Peptidase aspartic, catalytic
							0	JC_C100000601	No apical meristem (NAM) protein
							1	JC_C100000606	Ribonuclease H2, subunit C
							7	JC_C100000608	-
							1	JC_C100000610	GO:0043231//intracellular membrane-bounded organelle
							8	JC_C100000612	Inositol monophosphatase
							1	JC_C100000614	Protein kinase, catalytic domain IPR001611; Leucine-rich repeat IPR002290; Serine/threonine-protein kinase domain IPR003591; Leucine-rich repeat, typical subtype IPR011009; Protein kinase-like domain IPR013210; Leucine-rich repeat, N-terminal IPR017442; Serine/threonine-protein kinase-like domain IPR020635; Tyrosine-protein kinase, subgroup, catalytic domain
							2	JC_C100000623	XYPPX repeat
							7	JC_C100000625	Harpin-induced 1
							4	JC_C100000629	Protein of unknown function DUF298 IPR009060; UBA-like
							8	JC_C100000645	Homeobox IPR003106; Leucine zipper, homeobox-associated IPR009057; Homeodomain-like
							3	JC_C100000646	IWS1, C-terminal IPR017923; TFIIS N-terminal
							4	JC_C100000648	Protein of unknown function DUF803
							8	JC_C100000656	Auxin efflux carrier
							1	JC_C100000658	Peptidase C78, ubiquitin fold modifier-specific peptidase 1/ 2
							7	JC_C100000661	ABC transporter, transmembrane region IPR003439; ABC transporter-like IPR003593; ATPase, AAA+ type, core IPR011527; ABC transporter, transmembrane region, type 1 IPR017940; ABC transporter integral membrane type 1
							4	JC_C100000665	-
							5	JC_C100000673	WD40 repeat IPR004883; Lateral organ boundaries, LOB IPR011046; WD40 repeat-like-containing domain IPR017986; WD40-repeat-containing domain IPR019781; WD40 repeat, subgroup IPR019782; WD40 repeat 2
							4	JC_C100000675	GO:0005753//mitochondrial proton-transporting ATP synthase complex;GO:0005840//ribosome;GO:0031981//nuclear lumen;GO:0009534//chloroplast thylakoid
							8	JC_C100000682	Pentatricopeptide repeat
							4	JC_C100000683	Heat shock protein DnaJ, N-terminal
							1	JC_C100000685	IQ calmodulin-binding region
							8	JC_C100000687	Cyclin, C-terminal IPR006670; Cyclin IPR006671; Cyclin, N-terminal IPR011028; Cyclin-like
							3	JC_C100000691	Protein kinase, catalytic domain IPR002290; Serine/threonine-protein kinase domain IPR011009; Protein kinase-like domain IPR017442; Serine/threonine-protein kinase-like domain IPR020635; Tyrosine-protein kinase, subgroup, catalytic domain
							4	JC_C100000695	Glycoside hydrolase, family 47
							2	JC_C100000705	RNA recognition motif, RNP-1
							7	JC_C100000709	-
							7	JC_C100000711	Transcription factor, MADS-box
							8	JC_C100000716	-
							5	JC_C100000721	Haem peroxidase, plant/fungal/bacterial IPR010255; Haem peroxidase
							3	JC_C100000725	General substrate transporter IPR016196; Major facilitator superfamily, general substrate transporter
							4	JC_C100000733	Reticulon
							7	JC_C100000734	Peptidase C1A, papain C-terminal IPR013201; Proteinase inhibitor I29, cathepsin propeptide
							2	JC_C100000738	Zinc finger, CCCH-type IPR004087; K Homology IPR004088; K Homology, type 1 IPR018111; K Homology, type 1, subgroup
							4	JC_C100000740	Protein of unknown function DUF760
							2	JC_C100000747	Exo70 exocyst complex subunit
							7	JC_C100000749	Clp, N-terminal
							4	JC_C100000750	Histidine triad (HIT) protein IPR011146; Histidine triad-like motif
							1	JC_C100000753	Zinc finger, CCHC-type IPR010666; Zinc finger, GRF-type
							1	JC_C100000759	-
							1	JC_C100000761	GO:0016020//membrane
							1	JC_C100000762	Histone H3 IPR007125; Histone core IPR009072; Histone-fold
							8	JC_C100000763	WD40 repeat-like-containing domain IPR017986; WD40-repeat-containing domain
							8	JC_C100000765	-
							7	JC_C100000767	UDP-glucuronosyl/UDP-glucosyltransferase
							1	JC_C100000769	UDP-glucuronosyl/UDP-glucosyltransferase
							7	JC_C100000771	Lipoxygenase, LH2 IPR008976; Lipase/lipooxygenase, PLAT/LH2 IPR013819; Lipoxygenase, C-terminal
							8	JC_C100000775	-
							4	JC_C100000796	Basic helix-loop-helix dimerisation region bHLH IPR011598; Helix-loop-helix DNA-binding
							2	JC_C100000799	NAD-dependent epimerase/dehydratase IPR016040; NAD(P)-binding domain
							7	JC_C100000803	Zinc finger, C2H2-type
							0	JC_C100000814	Mitochodrial transcription termination factor-related
							2	JC_C100000816	Protein kinase, catalytic domain IPR001611; Leucine-rich repeat IPR002290; Serine/threonine-protein kinase domain IPR011009; Protein kinase-like domain IPR013210; Leucine-rich repeat, N-terminal IPR017442; Serine/threonine-protein kinase-like domain IPR020635; Tyrosine-protein kinase, subgroup, catalytic domain
							0	JC_C100000825	-
							0	JC_C100000826	GO:0009521;GO:0009536//plastid
							2	JC_C100000828	Aldehyde dehydrogenase IPR016161; Aldehyde/histidinol dehydrogenase
							4	JC_C100000834	Zinc finger, PHD-type IPR011011; Zinc finger, FYVE/PHD-type IPR019787; Zinc finger, PHD-finger
							4	JC_C100000838	Peptidase C14, caspase catalytic
							7	JC_C100000840	Glycosyl transferase, family 48
							4	JC_C100000844	Xyloglucan fucosyltransferase
							7	JC_C100000850	FAD-binding 8 IPR013121; Ferric reductase, NAD binding IPR013130; Ferric reductase-like transmembrane component, N-terminal IPR017927; Ferredoxin reductase-type FAD-binding domain IPR017938; Riboflavin synthase-like beta-barrel
							4	JC_C100000852	Oligopeptide transporter OPT superfamily
							3	JC_C100000853	Glutamine synthetase, catalytic region IPR008147; Glutamine synthetase, beta-Grasp
							5	JC_C100000857	K+ potassium transporter
							0	JC_C100000866	-
							8	JC_C100000867	Spo11/DNA topoisomerase VI, subunit A IPR013049; Spo11/DNA topoisomerase VI, subunit A, N-terminal
							2	JC_C100000874	Ribosomal protein 60S
							1	JC_C100000878	Ferredoxin
							4	JC_C100000881	-
							0	JC_C100000888	Tryptophan/tyrosine permease
							8	JC_C100000891	Target SNARE coiled-coil region IPR006011; Syntaxin, N-terminal IPR010989; t-SNARE
							7	JC_C100000896	Homeodomain-like IPR014778; Myb, DNA-binding IPR017930; Myb-type HTH DNA-binding domain
							4	JC_C100000898	Short-chain dehydrogenase/reductase SDR IPR016040; NAD(P)-binding domain
							4	JC_C100000899	Early nodulin 93 ENOD93 protein
							0	JC_C100000901	Zinc finger, RING-type IPR018957; Zinc finger, C3HC4 RING-type
							8	JC_C100000903	Rare lipoprotein A IPR007112; Expansin 45, endoglucanase-like IPR007117; Pollen allergen/expansin, C-terminal IPR009009; Barwin-related endoglucanase
							4	JC_C100000907	Thioredoxin-like fold IPR013766; Thioredoxin domain IPR017936; Thioredoxin-like
							0	JC_C100000909	Pentatricopeptide repeat
							0	JC_C100000912	No apical meristem (NAM) protein
							3	JC_C100000916	No apical meristem (NAM) protein
							0	JC_C100000918	Pentatricopeptide repeat
							2	JC_C100000920	Nucleoside phosphatase GDA1/CD39
							7	JC_C100000927	Glycoside hydrolase, family 28 IPR006626; Parallel beta-helix repeat IPR011050; Pectin lyase fold/virulence factor
							1	JC_C100000931	RNA recognition motif, RNP-1 IPR003954; RNA recognition, region 1
							8	JC_C100000933	DNA/RNA helicase, C-terminal IPR011545; DNA/RNA helicase, DEAD/DEAH box type, N-terminal IPR014001; DEAD-like helicase, N-terminal IPR014014; RNA helicase, DEAD-box type, Q motif IPR014021; Helicase, superfamily 1/2, ATP-binding domain
							6	JC_C100000935	Zinc finger, DHHC-type
							4	JC_C100000938	Rubrerythrin IPR009078; Ferritin/ribonucleotide reductase-like
							8	JC_C100000943	SWIB/MDM2 domain IPR014876; DEK, C-terminal IPR019835; SWIB domain
							2	JC_C100000944	Protein of unknown function DUF850, transmembrane eukaryotic
							4	JC_C100000946	-
							8	JC_C100000949	-
							5	JC_C100000955	Conserved hypothetical protein CHP00730
							4	JC_C100000956	Rare lipoprotein A IPR007112; Expansin 45, endoglucanase-like IPR007117; Pollen allergen/expansin, C-terminal IPR009009; Barwin-related endoglucanase
							2	JC_C100000958	Plastocyanin-like IPR008972; Cupredoxin
							8	JC_C100000961	Leucine-rich repeat
							0	JC_C100000963	Leucine-rich repeat IPR002182; NB-ARC
							5	JC_C100000968	-
							8	JC_C100000971	KIP1-like
							2	JC_C100000976	Glutamine amidotransferase class-I, C-terminal IPR017456; CTP synthase, N-terminal IPR017926; Glutamine amidotransferase type 1
							6	JC_C100000991	Heavy metal transport/detoxification protein
							8	JC_C100000995	Ankyrin repeat IPR020683; Ankyrin repeat-containing domain
							0	JC_C100001009	Mog1/PsbP/DUF1795, alpha/beta/alpha sandwich
							1	JC_C100001014	Retrotransposon gag protein
							3	JC_C100001024	-
							4	JC_C100001026	Ribosomal protein S25
							1	JC_C100001027	Transcription factor jumonji/aspartyl beta-hydroxylase IPR013129; Transcription factor jumonji IPR014977; WRC
							6	JC_C100001028	Citrate synthase-like IPR016141; Citrate synthase-like, core
							2	JC_C100001035	Cation efflux protein
							1	JC_C100001038	HEAT IPR001494; Importin-beta, N-terminal IPR016024; Armadillo-type fold
							2	JC_C100001042	Cytochrome b5
							1	JC_C100001049	Zinc finger, BED-type predicted IPR007021; Protein of unknown function DUF659 IPR008906; HAT dimerisation IPR011523; Protein of unknown function DUF1544
							0	JC_C100001053	Major facilitator superfamily MFS-1 IPR016196; Major facilitator superfamily, general substrate transporter
							1	JC_C100001056	Dynamin central region IPR001401; Dynamin, GTPase region IPR001849; Pleckstrin homology IPR003130; Dynamin GTPase effector IPR020850; GTPase effector domain, GED
							1	JC_C100001059	Galactose-binding like IPR012919; Sad1/UNC-like, C-terminal
							7	JC_C100001072	Glycoside hydrolase, family 28 IPR006626; Parallel beta-helix repeat IPR011050; Pectin lyase fold/virulence factor
							0	JC_C100001077	GroES-like IPR013149; Alcohol dehydrogenase, zinc-binding IPR016040; NAD(P)-binding domain IPR020843; Polyketide synthase, enoylreductase
							5	JC_C100001081	Glycoside hydrolase, family 28 IPR006626; Parallel beta-helix repeat IPR011050; Pectin lyase fold/virulence factor
							4	JC_C100001083	ATPase, AAA+ type, core IPR003959; ATPase, AAA-type, core
							1	JC_C100001085	-
							4	JC_C100001095	Protein kinase, catalytic domain IPR002290; Serine/threonine-protein kinase domain IPR011009; Protein kinase-like domain IPR017442; Serine/threonine-protein kinase-like domain IPR020635; Tyrosine-protein kinase, subgroup, catalytic domain
							4	JC_C100001096	WD40 repeat IPR011046; WD40 repeat-like-containing domain IPR017986; WD40-repeat-containing domain IPR019781; WD40 repeat, subgroup IPR019782; WD40 repeat 2
							1	JC_C100001097	Homeobox IPR006456; ZF-HD homeobox protein Cys/His-rich dimerisation region
							3	JC_C100001098	-
							1	JC_C100001099	ATPase, AAA+ type, core IPR003959; ATPase, AAA-type, core
							0	JC_C100001102	-
							7	JC_C100001103	-
							8	JC_C100001107	MAP65/ASE1
							4	JC_C100001110	Ubiquinol-cytochrome C chaperone
							1	JC_C100001113	Sucrose-6F-phosphate phosphohydrolase, plant/cyanobacteria IPR013679; Sucrose-6-phosphate phosphohydrolase C-terminal
							0	JC_C100001114	3-oxo-5-alpha-steroid 4-dehydrogenase, C-terminal
							8	JC_C100001118	ABC transporter-like IPR003593; ATPase, AAA+ type, core
							4	JC_C100001123	Domain of unknown function XH IPR005380; Domain of unknown function XS IPR005381; Domain of unknown function, putative Zinc finger, XS/XH
							8	JC_C100001127	Pentatricopeptide repeat
							1	JC_C100001131	Protein kinase, catalytic domain IPR002290; Serine/threonine-protein kinase domain IPR011009; Protein kinase-like domain IPR017442; Serine/threonine-protein kinase-like domain IPR020635; Tyrosine-protein kinase, subgroup, catalytic domain
							1	JC_C100001137	-
							1	JC_C100001139	Rare lipoprotein A IPR007112; Expansin 45, endoglucanase-like IPR007117; Pollen allergen/expansin, C-terminal IPR009009; Barwin-related endoglucanase
							1	JC_C100001142	Peptidase S54, rhomboid
							1	JC_C100001147	Glycoside hydrolase, family 3, N-terminal IPR002772; Glycoside hydrolase, family 3, C-terminal IPR017853; Glycoside hydrolase, catalytic core
							7	JC_C100001148	Heat shock protein Hsp20 IPR008978; HSP20-like chaperone
							4	JC_C100001151	Aminotransferase, class I/II IPR015424; Pyridoxal phosphate-dependent transferase, major region
							8	JC_C100001159	-
							0	JC_C100001164	Thaumatin, pathogenesis-related
							4	JC_C100001165	-
							3	JC_C100001172	-
							4	JC_C100001181	Oligopeptide transporter IPR016196; Major facilitator superfamily, general substrate transporter
							0	JC_C100001192	DNA-binding WRKY
							7	JC_C100001195	Dimeric alpha-beta barrel IPR013097; Stress responsive alpha-beta barrel
							3	JC_C100001198	Cellulose synthase
							2	JC_C100001201	Peptidase A1 IPR007856; Saposin-like type B, 1 IPR008138; Saposin-like type B, 2 IPR008139; Saposin B IPR009007; Peptidase aspartic, catalytic IPR011001; Saposin-like
							8	JC_C100001202	C4-dicarboxylate transporter/malic acid transport protein
							7	JC_C100001203	C4-dicarboxylate transporter/malic acid transport protein
							8	JC_C100001211	Cyclin, C-terminal IPR006670; Cyclin IPR006671; Cyclin, N-terminal IPR011028; Cyclin-like
							8	JC_C100001212	Cytochrome P450
							8	JC_C100001217	5'-3' exonuclease, N-terminal IPR020045; 5'-3' exonuclease, C-terminal subdomain IPR020046; 5'-3' exonuclease, N-terminal resolvase-like domain IPR020047; 5'-3' exonuclease, SAM-fold domain
							4	JC_C100001220	VHS IPR004152; GAT IPR008942; ENTH/VHS IPR018205; VHS subgroup
							8	JC_C100001222	General substrate transporter IPR016196; Major facilitator superfamily, general substrate transporter
							4	JC_C100001223	Ran GTPase IPR003577; Ras small GTPase, Ras type IPR003578; Ras small GTPase, Rho type IPR003579; Ras small GTPase, Rab type IPR006688; ADP-ribosylation factor IPR013753; Ras
							8	JC_C100001228	-
							7	JC_C100001230	Plant self-incompatibility S1
							1	JC_C100001234	Protein kinase, catalytic domain IPR001932; Protein phosphatase 2C-related IPR011009; Protein kinase-like domain IPR014045; Protein phosphatase 2C, N-terminal IPR017442; Serine/threonine-protein kinase-like domain
							4	JC_C100001237	WW/Rsp5/WWP IPR002713; FF domain
							1	JC_C100001241	BTB/POZ-like IPR004249; NPH3 IPR011333; BTB/POZ fold
							2	JC_C100001246	Protein kinase, catalytic domain IPR002290; Serine/threonine-protein kinase domain IPR011009; Protein kinase-like domain IPR017442; Serine/threonine-protein kinase-like domain IPR020635; Tyrosine-protein kinase, subgroup, catalytic domain
							5	JC_C100001247	Transferase
							1	JC_C100001255	Cellular retinaldehyde-binding/triple function, C-terminal IPR008273; Cellular retinaldehyde-binding/triple function, N-terminal IPR009038; GOLD IPR011074; Phosphatidylinositol transfer protein-like, N-terminal
							2	JC_C100001257	Protein kinase, catalytic domain IPR001611; Leucine-rich repeat IPR002290; Serine/threonine-protein kinase domain IPR011009; Protein kinase-like domain IPR013210; Leucine-rich repeat, N-terminal IPR017442; Serine/threonine-protein kinase-like domain IPR020635; Tyrosine-protein kinase, subgroup, catalytic domain
							1	JC_C100001263	Urease accessory protein UreD
							0	JC_C100001267	Cytochrome P450
							2	JC_C100001268	Polyprenyl synthetase IPR008949; Terpenoid synthase
							1	JC_C100001274	Protein kinase, catalytic domain IPR001245; Tyrosine-protein kinase, catalytic domain IPR002290; Serine/threonine-protein kinase domain IPR002912; Amino acid-binding ACT IPR011009; Protein kinase-like domain IPR020635; Tyrosine-protein kinase, subgroup, catalytic domain
							0	JC_C100001275	Mechanosensitive ion channel MscS IPR010920; Like-Sm ribonucleoprotein-related, core
							1	JC_C100001277	Uncharacterised protein family UPF0041
							0	JC_C100001278	Cellular retinaldehyde-binding/triple function, C-terminal IPR008273; Cellular retinaldehyde-binding/triple function, N-terminal IPR011074; Phosphatidylinositol transfer protein-like, N-terminal
							0	JC_C100001280	GO:0044464//cell part
							8	JC_C100001281	Pentatricopeptide repeat
							2	JC_C100001291	-
							8	JC_C100001292	Phospholipid/glycerol acyltransferase
							0	JC_C100001294	Photosystem I, PsaA/PsaB
							4	JC_C100001295	Nicastrin
							7	JC_C100001297	Heat shock protein DnaJ, cysteine-rich region IPR001623; Heat shock protein DnaJ, N-terminal IPR002939; Chaperone DnaJ, C-terminal IPR008971; HSP40/DnaJ peptide-binding
							6	JC_C100001298	Protein of unknown function DUF868, plant
							1	JC_C100001300	Phytochrome chromophore attachment domain
							8	JC_C100001301	Zinc finger, B-box IPR010402; CCT domain
							2	JC_C100001304	Zinc finger, RING-type IPR018957; Zinc finger, C3HC4 RING-type
							4	JC_C100001309	-
							7	JC_C100001311	-
							8	JC_C100001312	Exostosin-like
							8	JC_C100001313	SFT2-like
							4	JC_C100001315	Protein of unknown function DUF1665
							2	JC_C100001318	Armadillo IPR016024; Armadillo-type fold
							1	JC_C100001321	Synaptobrevin IPR010908; Longin IPR011012; Longin-like
							3	JC_C100001327	-
							7	JC_C100001328	TMS membrane protein/tumour differentially expressed protein
							5	JC_C100001329	Plant disease resistance response protein
							4	JC_C100001330	Glycosyl transferase, family 14
							4	JC_C100001331	Zinc finger, GATA-type
							8	JC_C100001333	-
							8	JC_C100001334	-
							1	JC_C100001335	Tetratricopeptide TPR-1 IPR013026; Tetratricopeptide region IPR019734; Tetratricopeptide repeat
							4	JC_C100001337	Monooxygenase, FAD-binding IPR006076; FAD dependent oxidoreductase
							7	JC_C100001339	Chalcone/stilbene synthase, N-terminal IPR012328; Chalcone/stilbene synthase, C-terminal IPR016039; Thiolase-like
							1	JC_C100001345	Oxoglutarate/iron-dependent oxygenase
							4	JC_C100001348	Cytochrome b5
							0	JC_C100001350	-
							8	JC_C100001352	-
							0	JC_C100001356	Zinc finger, B-box IPR006734; Protein of unknown function DUF597
							1	JC_C100001360	Inner nuclear membrane protein MAN1, C-terminal
							4	JC_C100001362	Reverse transcriptase, RNA-dependent DNA polymerase
							4	JC_C100001367	GO:0043231//intracellular membrane-bounded organelle
							1	JC_C100001372	Rhodanese-like
							4	JC_C100001373	Protein of unknown function DUF791 IPR016196; Major facilitator superfamily, general substrate transporter
							8	JC_C100001374	Metal-dependent protein hydrolase
							1	JC_C100001376	Vacuolar protein sorting-associated protein 26
							0	JC_C100001379	Aldo/keto reductase
							2	JC_C100001381	Glucosamine/galactosamine-6-phosphate isomerase
							4	JC_C100001385	Tetratricopeptide region IPR019734; Tetratricopeptide repeat
							1	JC_C100001391	Cytochrome P450
							1	JC_C100001396	Protein of unknown function DUF1022
							0	JC_C100001399	SANT, DNA-binding IPR009057; Homeodomain-like IPR014778; Myb, DNA-binding IPR017930; Myb-type HTH DNA-binding domain
							4	JC_C100001405	LisH dimerisation motif IPR007718; SRP40, C-terminal
							5	JC_C100001406	Ribosome-inactivating protein
							5	JC_C100001408	Ribosome-inactivating protein
							1	JC_C100001412	ABC transporter, transmembrane region IPR003439; ABC transporter-like IPR003593; ATPase, AAA+ type, core IPR011527; ABC transporter, transmembrane region, type 1 IPR017940; ABC transporter integral membrane type 1
							2	JC_C100001413	SNARE associated Golgi protein
							4	JC_C100001418	Kinesin, motor region
							7	JC_C100001422	Zinc finger, C2H2-type
							5	JC_C100001425	Plant disease resistance response protein
							1	JC_C100001426	-
							1	JC_C100001428	Chromo domain IPR001025; Bromo adjacent region IPR001525; DNA methylase, C-5 cytosine-specific IPR016197; Chromo domain-like
							4	JC_C100001429	Protein of unknown function DUF841, eukaryotic
							8	JC_C100001432	Zinc finger, C2H2-type IPR015880; Zinc finger, C2H2-like
							2	JC_C100001433	Vacuolar protein sorting 55
							3	JC_C100001437	Cyclin-like F-box
							4	JC_C100001441	Glycoside hydrolase, carbohydrate-binding IPR003385; Glycoside hydrolase, family 77 IPR013784; Carbohydrate-binding-like fold IPR017853; Glycoside hydrolase, catalytic core
							6	JC_C100001443	Reverse transcriptase, RNA-dependent DNA polymerase
							3	JC_C100001444	No apical meristem (NAM) protein
							7	JC_C100001446	General substrate transporter IPR016196; Major facilitator superfamily, general substrate transporter
							7	JC_C100001449	Multicopper oxidase, type 1 IPR008972; Cupredoxin IPR011706; Multicopper oxidase, type 2 IPR011707; Multicopper oxidase, type 3
							0	JC_C100001456	Membrane attack complex component/perforin (MACPF) domain IPR020865; Membrane attack complex component/perforin (MACPF) domain, metazoa
							8	JC_C100001457	Ammonium transporter
							1	JC_C100001461	ENTH/VHS IPR018610; Protein of unknown function DUF2043
							4	JC_C100001462	GRAS transcription factor
							4	JC_C100001465	Zinc finger, RING-type
							1	JC_C100001468	GO:0044464//cell part
							8	JC_C100001469	Oxidoreductase, N-terminal IPR004104; Oxidoreductase, C-terminal IPR016040; NAD(P)-binding domain
							1	JC_C100001471	MtN3/saliva-related transmembrane protein, conserved region
							0	JC_C100001474	-
							4	JC_C100001475	Peptidyl-prolyl cis-trans isomerase, PpiC-type IPR001763; Rhodanese-like
							0	JC_C100001478	Phosphatidylinositol N-acetylglucosaminyltransferase
							8	JC_C100001485	Zinc/iron permease
							4	JC_C100001489	Peptidase M20 IPR011650; Peptidase M20, dimerisation
							4	JC_C100001494	Shikimate kinase
							4	JC_C100001496	Double-stranded RNA binding IPR001650; DNA/RNA helicase, C-terminal IPR007502; Helicase-associated region IPR011545; DNA/RNA helicase, DEAD/DEAH box type, N-terminal IPR011709; Domain of unknown function DUF1605 IPR014001; DEAD-like helicase, N-terminal IPR014021; Helicase, superfamily 1/2, ATP-binding domain
							4	JC_C100001497	FAD dependent oxidoreductase
							4	JC_C100001498	GO:0016020//membrane
							2	JC_C100001502	Transcriptional factor B3 IPR010525; Auxin response factor IPR011525; Aux/IAA-ARF-dimerisation
							2	JC_C100001509	Protein kinase, catalytic domain IPR002290; Serine/threonine-protein kinase domain IPR011009; Protein kinase-like domain IPR017442; Serine/threonine-protein kinase-like domain IPR020635; Tyrosine-protein kinase, subgroup, catalytic domain
							2	JC_C100001510	Prefoldin beta-like IPR009053; Prefoldin
							4	JC_C100001513	Transcriptional factor B3 IPR010525; Auxin response factor IPR011525; Aux/IAA-ARF-dimerisation
							4	JC_C100001516	Prenyltransferase/squalene oxidase IPR008930; Terpenoid cylases/protein prenyltransferase alpha-alpha toroid
							8	JC_C100001517	Leucine-rich repeat, cysteine-containing subtype
							1	JC_C100001518	Protein phosphatase 2C-related IPR014045; Protein phosphatase 2C, N-terminal
							1	JC_C100001522	HEAT IPR016024; Armadillo-type fold
							1	JC_C100001524	Cytochrome P450
							4	JC_C100001529	Ribonuclease H2, subunit B
							8	JC_C100001530	Leucine-rich repeat IPR013210; Leucine-rich repeat, N-terminal
							4	JC_C100001534	Activator of Hsp90 ATPase, N-terminal
							1	JC_C100001536	-
							7	JC_C100001545	Alpha/beta hydrolase fold-3
							5	JC_C100001548	-
							8	JC_C100001549	Alpha/beta hydrolase fold-3
							5	JC_C100001550	Peptidase aspartic, catalytic
							6	JC_C100001553	Protein kinase, catalytic domain IPR002290; Serine/threonine-protein kinase domain IPR011009; Protein kinase-like domain IPR017442; Serine/threonine-protein kinase-like domain IPR020635; Tyrosine-protein kinase, subgroup, catalytic domain
							0	JC_C100001555	Transferase
							1	JC_C100001561	Beta-N-acetylhexosaminidase-like IPR015883; Glycoside hydrolase, family 20, catalytic core IPR017853; Glycoside hydrolase, catalytic core
							1	JC_C100001562	Plant lipid transfer protein/seed storage/trypsin-alpha amylase inhibitor IPR016140; Bifunctional inhibitor/plant lipid transfer protein/seed storage
							7	JC_C100001563	IQ calmodulin-binding region IPR002710; Dilute IPR018444; Dil domain
							8	JC_C100001567	-
							8	JC_C100001568	ATPase, AAA+ type, core IPR003959; ATPase, AAA-type, core
							3	JC_C100001569	-
							1	JC_C100001571	Zinc finger, RING-type IPR018957; Zinc finger, C3HC4 RING-type
							0	JC_C100001572	GO:0044464//cell part
							8	JC_C100001579	Homeobox IPR003106; Leucine zipper, homeobox-associated IPR009057; Homeodomain-like
							4	JC_C100001580	-
							4	JC_C100001581	SANT, DNA-binding IPR001487; Bromodomain IPR014778; Myb, DNA-binding
							8	JC_C100001582	Oxoglutarate/iron-dependent oxygenase
							3	JC_C100001583	Oxoglutarate/iron-dependent oxygenase
							2	JC_C100001588	Protein of unknown function DUF239, plant
							4	JC_C100001594	Major facilitator superfamily, general substrate transporter
							7	JC_C100001595	Plant lipid transfer protein/seed storage/trypsin-alpha amylase inhibitor IPR016140; Bifunctional inhibitor/plant lipid transfer protein/seed storage
							6	JC_C100001596	Elongator protein 3/MiaB/NifB IPR007197; Radical SAM IPR010505; Molybdenum cofactor synthesis C-terminal
							3	JC_C100001602	Protein kinase, catalytic domain IPR001480; Curculin-like (mannose-binding) lectin IPR002290; Serine/threonine-protein kinase domain IPR011009; Protein kinase-like domain IPR017442; Serine/threonine-protein kinase-like domain IPR020635; Tyrosine-protein kinase, subgroup, catalytic domain
							2	JC_C100001603	Protein kinase, catalytic domain IPR002290; Serine/threonine-protein kinase domain IPR011009; Protein kinase-like domain IPR017442; Serine/threonine-protein kinase-like domain IPR020635; Tyrosine-protein kinase, subgroup, catalytic domain
							7	JC_C100001605	-
							0	JC_C100001610	Transcription factor jumonji/aspartyl beta-hydroxylase IPR013109; Cupin 4
							4	JC_C100001615	-
							1	JC_C100001620	Protein kinase, catalytic domain IPR002290; Serine/threonine-protein kinase domain IPR011009; Protein kinase-like domain IPR017442; Serine/threonine-protein kinase-like domain IPR020635; Tyrosine-protein kinase, subgroup, catalytic domain
							7	JC_C100001627	Heat shock protein DnaJ, N-terminal IPR017896; 4Fe-4S ferredoxin, iron-sulpur binding domain
							2	JC_C100001634	Pectinesterase, catalytic IPR006501; Pectinesterase inhibitor IPR011050; Pectin lyase fold/virulence factor
							8	JC_C100001635	Protein of unknown function DUF231, plant
							8	JC_C100001636	Aspartate/glutamate/uridylate kinase IPR002912; Amino acid-binding ACT IPR005106; Aspartate/homoserine dehydrogenase, NAD-binding IPR016040; NAD(P)-binding domain
							7	JC_C100001641	Glycosyl transferase, family 8
							3	JC_C100001644	Oligopeptide transporter IPR016196; Major facilitator superfamily, general substrate transporter
							4	JC_C100001645	-
							4	JC_C100001647	-
							4	JC_C100001652	Dihydrodipicolinate reductase IPR016040; NAD(P)-binding domain
							4	JC_C100001653	Glycosyl transferase, family 20 IPR003337; Trehalose-phosphatase
							3	JC_C100001655	Uncharacterised protein family UPF0089 IPR009721; Protein of unknown function DUF1298
							8	JC_C100001656	Phytosulfokine
							8	JC_C100001659	-
							1	JC_C100001662	-
							4	JC_C100001664	DAHP synthetase I/KDSA
							7	JC_C100001671	Pentatricopeptide repeat
							5	JC_C100001672	Pentatricopeptide repeat
							8	JC_C100001675	WD40 repeat IPR011046; WD40 repeat-like-containing domain IPR017986; WD40-repeat-containing domain IPR019781; WD40 repeat, subgroup IPR019782; WD40 repeat 2
							8	JC_C100001676	Pectinesterase inhibitor
							4	JC_C100001681	Double-stranded RNA binding
							2	JC_C100001686	Pectinesterase, catalytic IPR006501; Pectinesterase inhibitor IPR011050; Pectin lyase fold/virulence factor
							8	JC_C100001688	-
							1	JC_C100001689	Pentatricopeptide repeat
							1	JC_C100001695	Peptidase C48, SUMO/Sentrin/Ubl1
							4	JC_C100001697	-
							7	JC_C100001699	Auxin responsive SAUR protein
							1	JC_C100001706	GO:0034357
							6	JC_C100001710	K Homology IPR004088; K Homology, type 1 IPR018111; K Homology, type 1, subgroup
							2	JC_C100001717	CHCH
							4	JC_C100001721	Isochorismatase-like
							1	JC_C100001722	-
							1	JC_C100001725	Glutamine amidotransferase class-I, C-terminal IPR017926; Glutamine amidotransferase type 1
							5	JC_C100001726	No apical meristem (NAM) protein
							4	JC_C100001730	Cyclic nucleotide-binding IPR005821; Ion transport IPR018490; Cyclic nucleotide-binding-like
							0	JC_C100001732	Protein of unknown function DUF2010
							1	JC_C100001733	Pentatricopeptide repeat
							1	JC_C100001739	Protein of unknown function DUF829, transmembrane 53
							4	JC_C100001740	Cytidylyltransferase
							5	JC_C100001741	Target SNARE coiled-coil region IPR010989; t-SNARE
							2	JC_C100001746	Metal-dependent protein hydrolase
							1	JC_C100001747	Alpha/beta hydrolase fold-1
							1	JC_C100001751	Aldose 1-epimerase IPR011013; Glycoside hydrolase-type carbohydrate-binding
							6	JC_C100001768	Signal transduction response regulator, receiver region IPR009057; Homeodomain-like IPR011006; CheY-like IPR014778; Myb, DNA-binding IPR017930; Myb-type HTH DNA-binding domain
							5	JC_C100001773	Oxoglutarate/iron-dependent oxygenase
							4	JC_C100001774	Zinc finger, RING-type IPR002867; Zinc finger, C6HC-type IPR018957; Zinc finger, C3HC4 RING-type
							8	JC_C100001777	GO:0031224//intrinsic to membrane;GO:0009528//plastid inner membrane
							3	JC_C100001779	-
							8	JC_C100001780	IQ calmodulin-binding region
							1	JC_C100001790	F-actin capping protein, beta subunit
							4	JC_C100001791	-
							1	JC_C100001799	UBX IPR006577; UAS
							3	JC_C100001800	Pentapeptide repeat
							5	JC_C100001801	-
							8	JC_C100001803	NAD-dependent epimerase/dehydratase IPR016040; NAD(P)-binding domain
							2	JC_C100001805	Clathrin/coatomer adaptor, adaptin-like, N-terminal IPR008152; Clathrin adaptor, alpha/beta/gamma-adaptin, appendage, Ig-like subdomain IPR009028; Clathrin/coatomer adaptor, adaptin-like, appendage, C-terminal subdomain IPR013041; Clathrin/coatomer adaptor, adaptin-like, appendage, Ig-like subdomain IPR015151; Clathrin adaptor, beta-adaptin, appendage, C-terminal subdomain IPR016024; Armadillo-ty…
							2	JC_C100001806	Tubulin/FtsZ, GTPase domain IPR008280; Tubulin/FtsZ, C-terminal IPR018316; Tubulin/FtsZ, 2-layer sandwich domain IPR019746; Tubulin/FtsZ, N-terminal
							7	JC_C100001811	Thaumatin, pathogenesis-related
							8	JC_C100001824	Methyladenine glycosylase IPR011257; DNA glycosylase
							2	JC_C100001826	Protein of unknown function DUF23
							8	JC_C100001827	DNA-dependent ATPase MCM IPR016027; Nucleic acid-binding, OB-fold-like
							3	JC_C100001830	Protein kinase, catalytic domain IPR001223; Glycoside hydrolase, family 18, catalytic domain IPR002290; Serine/threonine-protein kinase domain IPR011009; Protein kinase-like domain IPR011583; Chitinase II IPR017442; Serine/threonine-protein kinase-like domain IPR017853; Glycoside hydrolase, catalytic core IPR020635; Tyrosine-protein kinase, subgroup, catalytic domain
							1	JC_C100001832	GO:0009534//chloroplast thylakoid
							5	JC_C100001833	Protein of unknown function DUF246, plant
							6	JC_C100001834	NmrA-like IPR016040; NAD(P)-binding domain
							2	JC_C100001835	Protein of unknown function DUF632 IPR006868; Protein of unknown function DUF630
							7	JC_C100001839	Cytochrome P450
							7	JC_C100001840	No apical meristem (NAM) protein
							4	JC_C100001844	-
							7	JC_C100001845	Carotenoid oxygenase
							4	JC_C100001855	Tetratricopeptide TPR-1 IPR013026; Tetratricopeptide region IPR013105; Tetratricopeptide TPR2 IPR019734; Tetratricopeptide repeat
							4	JC_C100001860	Synaptojanin, N-terminal
							1	JC_C100001867	-
							7	JC_C100001869	-
							4	JC_C100001871	Zinc finger, ZZ-type IPR001005; SANT, DNA-binding IPR007526; SWIRM IPR009057; Homeodomain-like IPR014778; Myb, DNA-binding IPR017884; SANT, eukarya
							2	JC_C100001874	VQ
							8	JC_C100001875	Mpv17/PMP22
							1	JC_C100001883	Protein of unknown function DUF1296
							7	JC_C100001887	FAD dependent oxidoreductase IPR013698; Squalene epoxidase
							8	JC_C100001890	-
							6	JC_C100001892	GO:0009534//chloroplast thylakoid
							8	JC_C100001896	Protein kinase, catalytic domain IPR001220; Legume lectin, beta chain IPR002290; Serine/threonine-protein kinase domain IPR008985; Concanavalin A-like lectin/glucanase IPR011009; Protein kinase-like domain IPR017442; Serine/threonine-protein kinase-like domain IPR020635; Tyrosine-protein kinase, subgroup, catalytic domain
							2	JC_C100001897	-
							7	JC_C100001898	Glycoside hydrolase, family 16 IPR008985; Concanavalin A-like lectin/glucanase IPR010713; Xyloglucan endo-transglycosylase, C-terminal
							7	JC_C100001904	Toll-Interleukin receptor IPR001611; Leucine-rich repeat IPR002182; NB-ARC IPR011713; Leucine-rich repeat 3
							6	JC_C100001907	Basic-leucine zipper (bZIP) transcription factor IPR011616; bZIP transcription factor, bZIP-1
							0	JC_C100001910	RNA recognition motif, RNP-1
							1	JC_C100001913	Nonaspanin (TM9SF)
							4	JC_C100001918	FAD-dependent pyridine nucleotide-disulphide oxidoreductase
							1	JC_C100001921	Zinc finger, AN1-type IPR002653; Zinc finger, A20-type
							8	JC_C100001922	Glycosyl transferase, family 29
							3	JC_C100001925	BRCT IPR004102; Poly(ADP-ribose) polymerase, regulatory region IPR008893; WGR IPR012317; Poly(ADP-ribose) polymerase, catalytic region IPR012982; PADR1
							4	JC_C100001928	Protein kinase, catalytic domain IPR002290; Serine/threonine-protein kinase domain IPR011009; Protein kinase-like domain IPR017442; Serine/threonine-protein kinase-like domain IPR020635; Tyrosine-protein kinase, subgroup, catalytic domain
							1	JC_C100001932	Phospholipase C, phosphatidylinositol-specific , X region IPR017946; PLC-like phosphodiesterase, TIM beta/alpha-barrel domain
							3	JC_C100001935	GO:0043231//intracellular membrane-bounded organelle
							4	JC_C100001939	Phospholipase A2
							5	JC_C100001940	Aminotransferase, class V/Cysteine desulfurase IPR015424; Pyridoxal phosphate-dependent transferase, major region
							1	JC_C100001943	Pentatricopeptide repeat
							0	JC_C100001945	Pentatricopeptide repeat
							0	JC_C100001950	Photosystem II protein PsbR
							4	JC_C100001951	Conserved oligomeric Golgi complex, subunit 5
							1	JC_C100001953	Protein kinase, catalytic domain IPR002290; Serine/threonine-protein kinase domain IPR011009; Protein kinase-like domain IPR017442; Serine/threonine-protein kinase-like domain IPR020635; Tyrosine-protein kinase, subgroup, catalytic domain
							5	JC_C100001955	-
							4	JC_C100001957	Protein of unknown function DUF1751, integral membrane, eukaryotic
							4	JC_C100001966	Bromodomain
							4	JC_C100001969	Uncharacterised protein family UPF0120
							4	JC_C100001970	Chlorophyll A-B binding protein
							6	JC_C100001972	Ubiquitin-conjugating enzyme, E2 IPR016135; Ubiquitin-conjugating enzyme/RWD-like
							7	JC_C100001973	Mlo-related protein
							8	JC_C100001974	Tetraspanin
							1	JC_C100001976	Peptidase S10, serine carboxypeptidase
							0	JC_C100001977	-
							4	JC_C100001983	Pseudouridine synthase, RsuA and RluB/C/D/E/F IPR020103; Pseudouridine synthase, catalytic domain
							1	JC_C100001985	Transcription initiation factor IIF, beta subunit IPR011039; Transcription Factor IIF, Rap30/Rap74, interaction
							8	JC_C100001989	Nucleoside phosphorylase
							2	JC_C100001990	Nucleoside phosphorylase
							8	JC_C100001992	GO:0009536//plastid
							2	JC_C100001997	Pyridoxal phosphate-dependent decarboxylase IPR015424; Pyridoxal phosphate-dependent transferase, major region
							8	JC_C100002001	Pentatricopeptide repeat
							4	JC_C100002003	RNA-processing protein, HAT helix IPR013633; Protein of unknown function DUF1740
							1	JC_C100002007	tRNA isopentenyltransferase
							1	JC_C100002010	Glycosyl transferase, group 1 IPR013534; Starch synthase catalytic region
							4	JC_C100002011	Longin IPR011012; Longin-like
							4	JC_C100002015	Short-chain dehydrogenase/reductase SDR IPR016040; NAD(P)-binding domain
							0	JC_C100002020	Rhodanese-like
							1	JC_C100002027	Protein of unknown function DUF239, plant
							7	JC_C100002028	-
							8	JC_C100002029	Peptidase C2, calpain IPR008985; Concanavalin A-like lectin/glucanase
							2	JC_C100002035	NB-ARC
							7	JC_C100002039	Plant disease resistance response protein
							7	JC_C100002040	Plant disease resistance response protein
							7	JC_C100002041	NB-ARC
							7	JC_C100002044	Protein kinase, catalytic domain IPR001611; Leucine-rich repeat IPR002290; Serine/threonine-protein kinase domain IPR011009; Protein kinase-like domain IPR017442; Serine/threonine-protein kinase-like domain IPR020635; Tyrosine-protein kinase, subgroup, catalytic domain
							1	JC_C100002048	Phospholipid/glycerol acyltransferase
							2	JC_C100002050	Oxoglutarate/iron-dependent oxygenase
							8	JC_C100002062	RNA recognition motif, RNP-1
							4	JC_C100002063	Protein of unknown function DUF1683, C-terminal
							7	JC_C100002064	ATP-binding region, ATPase-like IPR011124; Zinc finger, CW-type
							7	JC_C100002065	Zinc finger, Sec23/Sec24-type IPR006896; Sec23/Sec24 trunk region IPR006900; Sec23/Sec24 helical region IPR007123; Gelsolin region IPR012990; Sec23/Sec24 beta-sandwich
							4	JC_C100002071	Protein of unknown function DUF803
							1	JC_C100002074	Protein kinase, catalytic domain IPR001220; Legume lectin, beta chain IPR002290; Serine/threonine-protein kinase domain IPR008985; Concanavalin A-like lectin/glucanase IPR011009; Protein kinase-like domain IPR017442; Serine/threonine-protein kinase-like domain IPR020635; Tyrosine-protein kinase, subgroup, catalytic domain
							4	JC_C100002075	Peptidase S8/S53, subtilisin/kexin/sedolisin IPR003137; Protease-associated PA
							4	JC_C100002077	Transcription factor, FAR1-related IPR006564; Zinc finger, PMZ-type IPR007527; Zinc finger, SWIM-type IPR018289; MULE transposase, conserved domain
							0	JC_C100002078	Auxin efflux carrier
							8	JC_C100002080	Auxin efflux carrier
							1	JC_C100002084	Hydroxymethylglutaryl-CoA reductase, class I/II, catalytic IPR009023; Hydroxymethylglutaryl-CoA reductase, class I/II, NAD/NADP-binding IPR009029; Hydroxymethylglutaryl-CoA reductase, class I/II, substrate-binding
							2	JC_C100002086	Rop nucleotide exchanger, PRONE
							1	JC_C100002091	Armadillo IPR003613; U box domain IPR016024; Armadillo-type fold
							7	JC_C100002099	RNA recognition motif, RNP-1 IPR000571; Zinc finger, CCCH-type
							4	JC_C100002101	RNA recognition motif, RNP-1 IPR003954; RNA recognition, region 1
							1	JC_C100002103	Carbohydrate/purine kinase
							1	JC_C100002112	Protein of unknown function DUF250
							8	JC_C100002113	-
							1	JC_C100002122	Acid phosphatase/vanadium-dependent haloperoxidase related
							1	JC_C100002124	GHMP kinase IPR013750; GHMP kinase, C-terminal IPR020568; Ribosomal protein S5 domain 2-type fold
							3	JC_C100002130	Plant EC metallothionein-like protein, family 15
							4	JC_C100002135	TRAM/LAG1/CLN8 homology domain
							7	JC_C100002142	MYB-like
							4	JC_C100002143	Glycosyltransferase sugar-binding region containing DXD motif IPR007652; Alpha 1,4-glycosyltransferase conserved region
							4	JC_C100002145	Glutathione S-transferase, C-terminal IPR010987; Glutathione S-transferase, C-terminal-like IPR012336; Thioredoxin-like fold IPR017933; Glutathione S-transferase/chloride channel, C-terminal
							4	JC_C100002158	Glycosyl transferase, family 48
							4	JC_C100002160	Ovarian tumour, otubain
							4	JC_C100002166	GO:0016020//membrane
							7	JC_C100002167	Glycoside hydrolase, family 16 IPR008985; Concanavalin A-like lectin/glucanase IPR010713; Xyloglucan endo-transglycosylase, C-terminal
							0	JC_C100002169	-
							4	JC_C100002172	-
							8	JC_C100002174	-
							7	JC_C100002182	Patatin IPR016035; Acyl transferase/acyl hydrolase/lysophospholipase
							4	JC_C100002187	Protein of unknown function DUF676, hydrolase-like
							4	JC_C100002193	Cytochrome c oxidase assembly protein CtaG/Cox11
							1	JC_C100002195	Mitochondrial matrix Mmp37
							4	JC_C100002196	Haloacid dehalogenase-like hydrolase
							0	JC_C100002197	-
							4	JC_C100002201	GO:0043231//intracellular membrane-bounded organelle
							2	JC_C100002203	D-galactoside/L-rhamnose binding SUEL lectin IPR001944; Glycoside hydrolase, family 35 IPR008979; Galactose-binding like IPR017853; Glycoside hydrolase, catalytic core
							4	JC_C100002215	Transcription factor, MADS-box
							4	JC_C100002216	-
							2	JC_C100002217	C2 calcium-dependent membrane targeting IPR008973; C2 calcium/lipid-binding region, CaLB IPR013583; Phosphoribosyltransferase C-terminal, plant IPR018029; C2 membrane targeting protein
							4	JC_C100002220	Basic helix-loop-helix dimerisation region bHLH IPR011598; Helix-loop-helix DNA-binding
							1	JC_C100002221	Oligopeptide transporter IPR016196; Major facilitator superfamily, general substrate transporter
							8	JC_C100002223	UDP-glucuronosyl/UDP-glucosyltransferase
							6	JC_C100002225	-
							2	JC_C100002228	Protein of unknown function DUF284, transmembrane eukaryotic
							1	JC_C100002229	Terpene synthase-like IPR005630; Terpene synthase, metal-binding domain IPR008930; Terpenoid cylases/protein prenyltransferase alpha-alpha toroid IPR008949; Terpenoid synthase
							2	JC_C100002233	IMP dehydrogenase/GMP reductase
							7	JC_C100002234	X8
							4	JC_C100002235	-
							8	JC_C100002237	Male sterility IPR013120; Male sterility, NAD-binding IPR016040; NAD(P)-binding domain
							0	JC_C100002240	-
							3	JC_C100002241	Cytochrome P450
							3	JC_C100002242	-
							7	JC_C100002243	Cytochrome P450
							3	JC_C100002245	Terpene synthase-like IPR005630; Terpene synthase, metal-binding domain IPR008930; Terpenoid cylases/protein prenyltransferase alpha-alpha toroid IPR008949; Terpenoid synthase
							3	JC_C100002248	-
							5	JC_C100002256	GroES-like IPR013149; Alcohol dehydrogenase, zinc-binding IPR016040; NAD(P)-binding domain IPR020843; Polyketide synthase, enoylreductase
							1	JC_C100002258	Short-chain dehydrogenase/reductase SDR IPR016040; NAD(P)-binding domain
							1	JC_C100002259	Cytochrome P450
							3	JC_C100002260	Terpene synthase-like IPR005630; Terpene synthase, metal-binding domain IPR008930; Terpenoid cylases/protein prenyltransferase alpha-alpha toroid IPR008949; Terpenoid synthase
							8	JC_C100002261	-
							0	JC_C100002264	Pentatricopeptide repeat
							2	JC_C100002265	Tubulin/FtsZ, GTPase domain IPR008280; Tubulin/FtsZ, C-terminal IPR018316; Tubulin/FtsZ, 2-layer sandwich domain IPR019746; Tubulin/FtsZ, N-terminal
							1	JC_C100002266	Protein kinase, catalytic domain IPR001611; Leucine-rich repeat IPR002290; Serine/threonine-protein kinase domain IPR003591; Leucine-rich repeat, typical subtype IPR011009; Protein kinase-like domain IPR013210; Leucine-rich repeat, N-terminal IPR017442; Serine/threonine-protein kinase-like domain IPR020635; Tyrosine-protein kinase, subgroup, catalytic domain
							4	JC_C100002271	Protein of unknown function DUF1639
							2	JC_C100002275	DREPP plasma membrane polypeptide
							4	JC_C100002279	WD40 repeat IPR011046; WD40 repeat-like-containing domain IPR017986; WD40-repeat-containing domain IPR019781; WD40 repeat, subgroup IPR019782; WD40 repeat 2
							4	JC_C100002282	Exostosin-like
							4	JC_C100002291	Nck-associated protein 1
							4	JC_C100002293	Alpha/beta hydrolase fold-1
							1	JC_C100002297	Basic-leucine zipper (bZIP) transcription factor IPR011616; bZIP transcription factor, bZIP-1 IPR012900; G-box binding, MFMR
							0	JC_C100002300	Zinc finger, RING-type IPR002867; Zinc finger, C6HC-type IPR006575; RWD IPR016135; Ubiquitin-conjugating enzyme/RWD-like IPR018957; Zinc finger, C3HC4 RING-type
							3	JC_C100002302	Glycoside hydrolase, family 16 IPR008985; Concanavalin A-like lectin/glucanase IPR010713; Xyloglucan endo-transglycosylase, C-terminal
							2	JC_C100002305	-
							8	JC_C100002306	Parallel beta-helix repeat IPR011050; Pectin lyase fold/virulence factor
							8	JC_C100002307	Pectin lyase fold/virulence factor
							0	JC_C100002309	Pectin lyase fold/virulence factor
							2	JC_C100002311	Cytidylyltransferase
							1	JC_C100002312	RNA recognition motif, RNP-1
							2	JC_C100002315	-
							8	JC_C100002317	Rop nucleotide exchanger, PRONE
							4	JC_C100002322	WD40 repeat IPR011046; WD40 repeat-like-containing domain IPR019781; WD40 repeat, subgroup
							2	JC_C100002323	Pectinacetylesterase
							5	JC_C100002324	-
							7	JC_C100002326	Pentatricopeptide repeat
							1	JC_C100002328	Pentatricopeptide repeat
							3	JC_C100002329	-
							8	JC_C100002331	Major facilitator superfamily MFS-1 IPR016196; Major facilitator superfamily, general substrate transporter
							4	JC_C100002333	Zinc finger, RING-type IPR018957; Zinc finger, C3HC4 RING-type
							7	JC_C100002338	Pectinacetylesterase
							4	JC_C100002339	WD40 repeat IPR011046; WD40 repeat-like-containing domain IPR017986; WD40-repeat-containing domain IPR019781; WD40 repeat, subgroup IPR019782; WD40 repeat 2
							7	JC_C100002344	FAD linked oxidase, N-terminal IPR012951; Berberine/berberine-like IPR016166; FAD-binding, type 2
							8	JC_C100002347	FAD linked oxidase, N-terminal IPR012951; Berberine/berberine-like IPR016166; FAD-binding, type 2
							2	JC_C100002351	Calcium-binding EF-hand IPR018248; EF-Hand domain IPR018249; EF-HAND 2
							4	JC_C100002352	Major intrinsic protein
							1	JC_C100002353	Protein kinase-like domain
							2	JC_C100002357	Ubiquitin-conjugating enzyme, E2 IPR016135; Ubiquitin-conjugating enzyme/RWD-like
							8	JC_C100002358	-
							4	JC_C100002363	RNA recognition motif, RNP-1
							7	JC_C100002365	Ankyrin repeat IPR020683; Ankyrin repeat-containing domain
							4	JC_C100002369	-
							2	JC_C100002372	General substrate transporter IPR016196; Major facilitator superfamily, general substrate transporter
							0	JC_C100002375	-
							4	JC_C100002376	HhH-GPD domain IPR011257; DNA glycosylase
							7	JC_C100002377	Alpha/beta hydrolase fold-1
							8	JC_C100002378	Zinc finger, GATA-type
							1	JC_C100002384	Cation efflux protein
							0	JC_C100002385	Photosystem II oxygen evolving complex protein PsbP IPR016124; Mog1/PsbP/DUF1795, alpha/beta/alpha sandwich
							1	JC_C100002387	Photosystem II oxygen evolving complex protein PsbP IPR016124; Mog1/PsbP/DUF1795, alpha/beta/alpha sandwich
							2	JC_C100002388	Ribosomal protein L23/L25, N-terminal IPR012678; Ribosomal protein L23/L15e, core IPR013025; Ribosomal protein L25/L23
							1	JC_C100002390	PWWP
							8	JC_C100002392	Dual specificity phosphatase, catalytic domain IPR000387; Dual-specific/protein-tyrosine phosphatase, conserved region IPR020422; Dual specificity phosphatase, subgroup, catalytic domain
							4	JC_C100002394	Beta-N-acetylhexosaminidase-like IPR015883; Glycoside hydrolase, family 20, catalytic core IPR017853; Glycoside hydrolase, catalytic core
							1	JC_C100002396	-
							2	JC_C100002397	Fatty acid hydroxylase
							0	JC_C100002399	Pentatricopeptide repeat
							0	JC_C100002400	Armadillo IPR016024; Armadillo-type fold
							6	JC_C100002408	-
							4	JC_C100002411	AAR2
							0	JC_C100002414	GO:0043231//intracellular membrane-bounded organelle
							6	JC_C100002417	-
							6	JC_C100002418	-
							8	JC_C100002420	-
							1	JC_C100002422	Zinc finger, RING-CH-type IPR018957; Zinc finger, C3HC4 RING-type
							7	JC_C100002426	-
							1	JC_C100002431	GO:0044444//cytoplasmic part;GO:0016020//membrane
							7	JC_C100002433	SANT, DNA-binding IPR009057; Homeodomain-like IPR014778; Myb, DNA-binding IPR017930; Myb-type HTH DNA-binding domain
							4	JC_C100002440	High mobility group, HMG1/HMG2 IPR008974; TRAF-like IPR009071; High mobility group, superfamily IPR013010; Zinc finger, SIAH-type IPR018121; Seven in absentia protein, TRAF-like domain
							4	JC_C100002445	ELL-associated factor
							4	JC_C100002447	Exoribonuclease, phosphorolytic domain 1 IPR015847; Exoribonuclease, phosphorolytic domain 2 IPR020568; Ribosomal protein S5 domain 2-type fold
							2	JC_C100002448	Methyltransferase type 12
							2	JC_C100002460	Glycoside hydrolase, family 19, catalytic
							8	JC_C100002461	MAP65/ASE1
							4	JC_C100002464	Aldo/keto reductase
							4	JC_C100002466	Aldo/keto reductase
							8	JC_C100002467	-
							5	JC_C100002468	Toll-Interleukin receptor IPR001611; Leucine-rich repeat IPR002182; NB-ARC IPR003591; Leucine-rich repeat, typical subtype
							6	JC_C100002469	-
							1	JC_C100002471	DNA/RNA helicase, C-terminal IPR007502; Helicase-associated region IPR011709; Domain of unknown function DUF1605 IPR014001; DEAD-like helicase, N-terminal IPR014021; Helicase, superfamily 1/2, ATP-binding domain
							4	JC_C100002472	Protein kinase, catalytic domain IPR001611; Leucine-rich repeat IPR002290; Serine/threonine-protein kinase domain IPR003591; Leucine-rich repeat, typical subtype IPR011009; Protein kinase-like domain IPR013210; Leucine-rich repeat, N-terminal IPR017442; Serine/threonine-protein kinase-like domain IPR020635; Tyrosine-protein kinase, subgroup, catalytic domain
							0	JC_C100002476	Zinc finger, Rad18-type putative IPR014883; VRR-NUC IPR014905; HIP116, Rad5p N-terminal
							4	JC_C100002479	Snf7
							8	JC_C100002490	Cyclin, C-terminal IPR006670; Cyclin IPR006671; Cyclin, N-terminal IPR011028; Cyclin-like
							6	JC_C100002491	Cyclin-like F-box IPR011043; Galactose oxidase/kelch, beta-propeller IPR011498; Kelch repeat type 2
							4	JC_C100002493	GO:0009526//plastid envelope;GO:0009532//plastid stroma;GO:0009534//chloroplast thylakoid
							3	JC_C100002494	-
							0	JC_C100002495	-
							3	JC_C100002497	Cation efflux protein
							4	JC_C100002505	Zinc finger, MYND-type IPR007320; Programmed cell death protein 2, C-terminal
							7	JC_C100002507	Aminoacyl-tRNA synthetase, class Ib
							4	JC_C100002509	GO:0043231//intracellular membrane-bounded organelle
							1	JC_C100002510	Nse4
							0	JC_C100002511	ATPase, AAA+ type, core IPR013765; DNA recombination and repair protein RecA IPR020587; DNA recombination/repair protein RecA, monomer-monomer interface IPR020588; DNA recombination/repair protein RecA/RadB, ATP-binding domain
							3	JC_C100002513	-
							4	JC_C100002518	NAD(P)-binding domain
							1	JC_C100002520	Protein kinase, catalytic domain IPR011009; Protein kinase-like domain IPR017442; Serine/threonine-protein kinase-like domain
							5	JC_C100002522	Harpin-induced 1
							0	JC_C100002524	Polynucleotidyl transferase, ribonuclease H fold
							5	JC_C100002525	-
							2	JC_C100002528	Heavy metal transport/detoxification protein
							4	JC_C100002531	No apical meristem (NAM) protein
							5	JC_C100002533	Cytochrome P450
							8	JC_C100002536	-
							0	JC_C100002539	Formiminotransferase IPR012886; Formiminotransferase, N-terminal
							8	JC_C100002545	Mechanosensitive ion channel MscS IPR010920; Like-Sm ribonucleoprotein-related, core
							1	JC_C100002550	Pentatricopeptide repeat
							7	JC_C100002552	Glycosyl transferase, family 31
							8	JC_C100002554	GroES-like IPR013149; Alcohol dehydrogenase, zinc-binding IPR016040; NAD(P)-binding domain IPR020843; Polyketide synthase, enoylreductase
							1	JC_C100002558	Prephenate dehydratase IPR002912; Amino acid-binding ACT
							1	JC_C100002560	Multicopper oxidase, type 1 IPR008972; Cupredoxin IPR011706; Multicopper oxidase, type 2 IPR011707; Multicopper oxidase, type 3
							4	JC_C100002564	SNF2-related IPR001650; DNA/RNA helicase, C-terminal IPR001841; Zinc finger, RING-type IPR014001; DEAD-like helicase, N-terminal IPR014021; Helicase, superfamily 1/2, ATP-binding domain IPR018957; Zinc finger, C3HC4 RING-type
							8	JC_C100002565	GO:0031224//intrinsic to membrane;GO:0043231//intracellular membrane-bounded organelle
							2	JC_C100002566	Aconitase A/isopropylmalate dehydratase small subunit, swivel IPR001030; Aconitase/3-isopropylmalate dehydratase large subunit, alpha/beta/alpha IPR015928; Aconitase/3-isopropylmalate dehydratase, swivel
							1	JC_C100002567	-
							1	JC_C100002569	PDZ/DHR/GLGF IPR008915; Peptidase M50
							4	JC_C100002571	Major intrinsic protein
							0	JC_C100002572	Major intrinsic protein
							2	JC_C100002574	Biotin/lipoyl attachment IPR001078; 2-oxoacid dehydrogenase acyltransferase, catalytic domain IPR011053; Single hybrid motif
							5	JC_C100002575	-
							4	JC_C100002576	GO:0043231//intracellular membrane-bounded organelle
							1	JC_C100002577	Protein kinase, catalytic domain IPR002290; Serine/threonine-protein kinase domain IPR011009; Protein kinase-like domain IPR017442; Serine/threonine-protein kinase-like domain IPR020635; Tyrosine-protein kinase, subgroup, catalytic domain
							2	JC_C100002583	Fatty acid hydroxylase
							1	JC_C100002586	-
							4	JC_C100002593	WD40 repeat IPR011046; WD40 repeat-like-containing domain IPR017986; WD40-repeat-containing domain IPR019781; WD40 repeat, subgroup IPR019782; WD40 repeat 2
							4	JC_C100002596	-
							8	JC_C100002606	Gibberellin regulated protein
							4	JC_C100002607	-
							6	JC_C100002609	Patatin IPR016035; Acyl transferase/acyl hydrolase/lysophospholipase
							2	JC_C100002610	Calcium-binding EF-hand IPR018248; EF-Hand domain IPR018249; EF-HAND 2
							7	JC_C100002611	Intron maturase, type II IPR000477; RNA-directed DNA polymerase (reverse transcriptase)
							2	JC_C100002612	Protein of unknown function DUF248, methyltransferase putative
							8	JC_C100002613	BTB/POZ-like IPR002110; Ankyrin repeat IPR011333; BTB/POZ fold IPR013069; BTB/POZ IPR020683; Ankyrin repeat-containing domain
							4	JC_C100002614	Lycopene beta/epsilon cyclase
							0	JC_C100002616	Methyltransferase type 12
							8	JC_C100002623	Armadillo-type fold
							8	JC_C100002625	Pyruvate kinase, beta-barrel-like IPR015793; Pyruvate kinase, barrel IPR015794; Pyruvate kinase, alpha/beta IPR015795; Pyruvate kinase, C-terminal-like IPR015813; Pyruvate/Phosphoenolpyruvate kinase, catalytic core
							1	JC_C100002628	Metallophosphoesterase
							2	JC_C100002629	Glycosyl transferase, family 4, conserved region
							1	JC_C100002635	GO:0009534//chloroplast thylakoid;GO:0016020//membrane
							0	JC_C100002636	Mur ligase, C-terminal IPR013221; Mur ligase, central
							0	JC_C100002638	Class I peptide chain release factor IPR005139; Peptide chain release factor
							7	JC_C100002645	-
							1	JC_C100002648	Calmodulin-binding protein, plant
							4	JC_C100002650	FAD linked oxidase, N-terminal IPR007173; D-arabinono-1,4-lactone oxidase IPR016166; FAD-binding, type 2
							8	JC_C100002652	WD40 repeat IPR011046; WD40 repeat-like-containing domain IPR017986; WD40-repeat-containing domain IPR019781; WD40 repeat, subgroup IPR019782; WD40 repeat 2
							7	JC_C100002653	Protein of unknown function DUF247, plant
							0	JC_C100002659	Pentatricopeptide repeat
							4	JC_C100002661	-
							0	JC_C100002662	Pentatricopeptide repeat
							8	JC_C100002663	Cytoskeleton-associated protein, CAP-Gly
							0	JC_C100002665	Polyadenylate-binding protein/Hyperplastic disc protein IPR011545; DNA/RNA helicase, DEAD/DEAH box type, N-terminal IPR014001; DEAD-like helicase, N-terminal IPR014021; Helicase, superfamily 1/2, ATP-binding domain
							1	JC_C100002669	GO:0043231//intracellular membrane-bounded organelle
							1	JC_C100002671	Inositol polyphosphate related phosphatase IPR005135; Endonuclease/exonuclease/phosphatase
							1	JC_C100002672	Short-chain dehydrogenase/reductase SDR IPR016040; NAD(P)-binding domain
							5	JC_C100002673	Protein kinase, catalytic domain IPR001611; Leucine-rich repeat IPR002290; Serine/threonine-protein kinase domain IPR003591; Leucine-rich repeat, typical subtype IPR011009; Protein kinase-like domain IPR013210; Leucine-rich repeat, N-terminal IPR017442; Serine/threonine-protein kinase-like domain IPR020635; Tyrosine-protein kinase, subgroup, catalytic domain
							1	JC_C100002675	Ribosomal protein S1, RNA binding domain IPR016027; Nucleic acid-binding, OB-fold-like
							8	JC_C100002676	Choline/ethanolamine kinase IPR007521; Choline kinase, N-terminal IPR011009; Protein kinase-like domain
							8	JC_C100002677	Prenylated rab acceptor PRA1
							4	JC_C100002684	GO:0042995//cell projection;GO:0031224//intrinsic to membrane;GO:0031410//cytoplasmic vesicle
							3	JC_C100002685	Calcium-binding EF-hand IPR018248; EF-Hand domain IPR018249; EF-HAND 2
							2	JC_C100002686	HEAT IPR016024; Armadillo-type fold
							3	JC_C100002691	-
							0	JC_C100002697	Photosystem I PsaG/PsaK protein
							2	JC_C100002700	Ubiquitin-conjugating enzyme, E2 IPR016135; Ubiquitin-conjugating enzyme/RWD-like
							1	JC_C100002704	Mitochodrial transcription termination factor-related
							8	JC_C100002705	-
							7	JC_C100002710	Amino acid transporter, transmembrane
							8	JC_C100002712	Transcription factor, MADS-box IPR002487; Transcription factor, K-box
							6	JC_C100002714	Multicopper oxidase, type 1 IPR008972; Cupredoxin IPR011706; Multicopper oxidase, type 2 IPR011707; Multicopper oxidase, type 3
							8	JC_C100002715	-
							3	JC_C100002716	C1-like
							4	JC_C100002717	3'-5' exonuclease IPR012337; Polynucleotidyl transferase, ribonuclease H fold
							1	JC_C100002726	Zinc finger, RING-type IPR002035; von Willebrand factor, type A IPR010734; Copine IPR018957; Zinc finger, C3HC4 RING-type
							8	JC_C100002727	Cytochrome P450 IPR002138; Peptidase C14, caspase non-catalytic subunit p10
							7	JC_C100002733	Oligopeptide transporter OPT superfamily
							4	JC_C100002736	Protein of unknown function DUF221
							1	JC_C100002738	AMP-dependent synthetase/ligase
							7	JC_C100002739	-
							4	JC_C100002741	GO:0005856//cytoskeleton
							4	JC_C100002744	K Homology IPR004088; K Homology, type 1 IPR018111; K Homology, type 1, subgroup
							0	JC_C100002750	Alpha/beta hydrolase fold-1
							1	JC_C100002755	-
							7	JC_C100002761	Protein of unknown function DUF699, ATPase putative IPR013562; Domain of unknown function DUF1726
							0	JC_C100002763	-
							7	JC_C100002766	Alpha/beta hydrolase fold-1
							7	JC_C100002767	Alpha/beta hydrolase fold-1
							4	JC_C100002768	Basic-leucine zipper (bZIP) transcription factor IPR011700; Basic leucine zipper
							4	JC_C100002770	-
							4	JC_C100002772	Methyltransferase-16, putative
							8	JC_C100002774	Ribosomal protein L1
							1	JC_C100002777	Cellular retinaldehyde-binding/triple function, C-terminal IPR008273; Cellular retinaldehyde-binding/triple function, N-terminal IPR011074; Phosphatidylinositol transfer protein-like, N-terminal
							5	JC_C100002781	Protein of unknown function DUF231, plant
							4	JC_C100002782	Amidase
							4	JC_C100002784	RNA polymerase II transcription factor SIII, subunit A
							1	JC_C100002785	AMP-dependent synthetase/ligase
							8	JC_C100002788	Protein of unknown function DUF250
							4	JC_C100002791	Cytochrome b5
							1	JC_C100002793	-
							3	JC_C100002799	-
							2	JC_C100002807	Cellular retinaldehyde-binding/triple function, C-terminal IPR008273; Cellular retinaldehyde-binding/triple function, N-terminal IPR009038; GOLD IPR011074; Phosphatidylinositol transfer protein-like, N-terminal
							8	JC_C100002810	Ribosomal protein L23/L15e, core IPR013025; Ribosomal protein L25/L23
							4	JC_C100002812	Putative RNA methylase
							4	JC_C100002813	Cation/H+ exchanger
							1	JC_C100002815	Pentatricopeptide repeat
							8	JC_C100002816	Pentatricopeptide repeat
							6	JC_C100002817	Complex 1 LYR protein
							4	JC_C100002818	-
							1	JC_C100002820	Chlorophyll A-B binding protein
							0	JC_C100002829	Leucine-rich repeat IPR002182; NB-ARC
							7	JC_C100002830	Alternative oxidase
							4	JC_C100002832	Carbamoyl phosphate synthetase, large subunit, ATP-binding IPR005481; Carbamoyl phosphate synthase, large subunit, N-terminal IPR005482; Biotin carboxylase, C-terminal IPR011054; Rudiment single hybrid motif IPR011761; ATP-grasp fold IPR011764; Biotin carboxylation region IPR016185; PreATP-grasp-like fold
							1	JC_C100002833	Toll-Interleukin receptor IPR001611; Leucine-rich repeat IPR002182; NB-ARC
							7	JC_C100002835	Pentatricopeptide repeat
							1	JC_C100002836	Plant lipid transfer protein/seed storage/trypsin-alpha amylase inhibitor IPR016140; Bifunctional inhibitor/plant lipid transfer protein/seed storage
							8	JC_C100002838	-
							4	JC_C100002839	Polymerase/histidinol phosphatase, N-terminal IPR004013; PHP, C-terminal IPR016195; Polymerase/histidinol phosphatase-like
							2	JC_C100002841	Plant lipid transfer protein/seed storage/trypsin-alpha amylase inhibitor IPR016140; Bifunctional inhibitor/plant lipid transfer protein/seed storage
							4	JC_C100002848	-
							2	JC_C100002851	Calcium-binding EF-hand IPR018248; EF-Hand domain IPR018249; EF-HAND 2
							6	JC_C100002854	5-AMP-activated protein kinase, beta subunit, complex-interacting region
							8	JC_C100002862	DNA mismatch repair protein MutS, C-terminal IPR007696; DNA mismatch repair protein MutS, core
							4	JC_C100002865	Band 7 protein
							8	JC_C100002866	Protein of unknown function DUF538
							7	JC_C100002873	Glycoside hydrolase, family 1 IPR017853; Glycoside hydrolase, catalytic core
							1	JC_C100002875	Cyclin-like F-box IPR006652; Kelch repeat type 1 IPR011043; Galactose oxidase/kelch, beta-propeller
							8	JC_C100002878	DNA/RNA helicase, C-terminal IPR011545; DNA/RNA helicase, DEAD/DEAH box type, N-terminal IPR014001; DEAD-like helicase, N-terminal IPR014014; RNA helicase, DEAD-box type, Q motif IPR014021; Helicase, superfamily 1/2, ATP-binding domain
							1	JC_C100002882	Like-Sm ribonucleoprotein, core IPR006649; Like-Sm ribonucleoprotein, core domain, eukaryotic/archaea-type IPR010920; Like-Sm ribonucleoprotein-related, core
							0	JC_C100002883	Protein of unknown function DUF2040, coiled-coil
							5	JC_C100002889	-
							1	JC_C100002893	NPH3
							8	JC_C100002894	Protein of unknown function DUF1218
							5	JC_C100002895	Basic helix-loop-helix dimerisation region bHLH IPR011598; Helix-loop-helix DNA-binding
							4	JC_C100002896	SET
							6	JC_C100002897	Terpene synthase-like IPR005630; Terpene synthase, metal-binding domain IPR008930; Terpenoid cylases/protein prenyltransferase alpha-alpha toroid IPR008949; Terpenoid synthase
							1	JC_C100002898	RHO protein GDP dissociation inhibitor IPR014756; Immunoglobulin E-set
							4	JC_C100002906	Glycoside hydrolase, catalytic core
							4	JC_C100002908	Plastocyanin-like IPR008972; Cupredoxin
							3	JC_C100002911	-
							2	JC_C100002916	Ribosomal protein L14b/L23e IPR016180; Ribosomal protein L10e/L16
							1	JC_C100002917	GO:0009532//plastid stroma
							8	JC_C100002919	-
							7	JC_C100002920	-
							8	JC_C100002921	-
							8	JC_C100002926	-
							8	JC_C100002928	Chloroplast Ycf2
							2	JC_C100002931	Zinc finger, RING-type IPR005150; Cellulose synthase
							4	JC_C100002932	ABA/WDS induced protein
							4	JC_C100002935	-
							4	JC_C100002937	GO:0044464//cell part
							4	JC_C100002939	WD40 repeat-like-containing domain IPR013863; Vacuolar import/degradation, Vid27-related
							2	JC_C100002945	Protein of unknown function DUF793
							1	JC_C100002947	WD40 repeat-like-containing domain
							2	JC_C100002951	Tubby, C-terminal IPR001810; Cyclin-like F-box
							0	JC_C100002953	Zinc finger, RING-type IPR018957; Zinc finger, C3HC4 RING-type
							7	JC_C100002955	Multicopper oxidase, type 1 IPR008972; Cupredoxin IPR011706; Multicopper oxidase, type 2 IPR011707; Multicopper oxidase, type 3
							7	JC_C100002956	-
							1	JC_C100002960	Exocyst complex component Sec6
							8	JC_C100002971	Peptidase C12, ubiquitin carboxyl-terminal hydrolase 1
							4	JC_C100002976	Ribosomal protein S1, RNA binding domain IPR003107; RNA-processing protein, HAT helix IPR016027; Nucleic acid-binding, OB-fold-like
							1	JC_C100002978	Zinc finger, TRAF-type IPR008611; Enterobacterial EspB IPR008974; TRAF-like
							0	JC_C100002979	-
							2	JC_C100002980	Ribosomal protein S28e IPR016027; Nucleic acid-binding, OB-fold-like
							4	JC_C100002982	DNA methylase, N-6 adenine-specific, eukaryotic
							4	JC_C100002985	Peptidase C19, ubiquitin carboxyl-terminal hydrolase 2 IPR002083; MATH IPR008974; TRAF-like
							1	JC_C100002987	Zinc finger, RING-type IPR004331; SPX, N-terminal IPR018957; Zinc finger, C3HC4 RING-type
							4	JC_C100002989	FAD-linked oxidase, C-terminal IPR006094; FAD linked oxidase, N-terminal IPR016164; FAD-linked oxidase-like, C-terminal IPR016166; FAD-binding, type 2
							8	JC_C100002996	Endonuclease/exonuclease/phosphatase
							8	JC_C100002999	Leucine-rich repeat, cysteine-containing subtype
							4	JC_C100003000	DNA/RNA helicase, C-terminal IPR011545; DNA/RNA helicase, DEAD/DEAH box type, N-terminal IPR014001; DEAD-like helicase, N-terminal IPR014014; RNA helicase, DEAD-box type, Q motif IPR014021; Helicase, superfamily 1/2, ATP-binding domain
							4	JC_C100003003	Phosphatidic acid phosphatase type 2/haloperoxidase
							8	JC_C100003008	Protein of unknown function DUF620
							4	JC_C100003010	RNA recognition motif, RNP-1
							4	JC_C100003014	Cleavage/polyadenylation specificity factor, A subunit, C-terminal
							4	JC_C100003023	Pentatricopeptide repeat
							7	JC_C100003024	Pentatricopeptide repeat
							6	JC_C100003025	Zinc finger, CCHC-type
							6	JC_C100003026	UspA
							3	JC_C100003027	UspA
							8	JC_C100003028	-
							4	JC_C100003031	Protease-associated PA IPR007365; Transferrin receptor-like, dimerisation IPR007484; Peptidase M28
							6	JC_C100003032	Amino acid transporter, transmembrane
							7	JC_C100003033	Amino acid transporter, transmembrane
							4	JC_C100003035	WD40 repeat IPR011046; WD40 repeat-like-containing domain IPR017986; WD40-repeat-containing domain IPR019781; WD40 repeat, subgroup IPR019782; WD40 repeat 2
							8	JC_C100003036	Basic helix-loop-helix dimerisation region bHLH IPR011598; Helix-loop-helix DNA-binding
							4	JC_C100003038	Protein kinase, catalytic domain IPR002290; Serine/threonine-protein kinase domain IPR011009; Protein kinase-like domain IPR017442; Serine/threonine-protein kinase-like domain IPR020635; Tyrosine-protein kinase, subgroup, catalytic domain
							4	JC_C100003041	-
							7	JC_C100003049	Polynucleotide adenylyltransferase region
							1	JC_C100003051	-
							7	JC_C100003053	Protein kinase, catalytic domain IPR002290; Serine/threonine-protein kinase domain IPR011009; Protein kinase-like domain IPR017442; Serine/threonine-protein kinase-like domain IPR020635; Tyrosine-protein kinase, subgroup, catalytic domain
							7	JC_C100003055	Protein kinase, catalytic domain IPR002290; Serine/threonine-protein kinase domain IPR004041; NAF domain IPR011009; Protein kinase-like domain IPR017442; Serine/threonine-protein kinase-like domain IPR018451; NAF/FISL domain IPR020635; Tyrosine-protein kinase, subgroup, catalytic domain
							8	JC_C100003057	Multi antimicrobial extrusion protein MatE
							6	JC_C100003061	-
							4	JC_C100003066	Zinc finger, B-box
							0	JC_C100003067	Zinc finger, B-box IPR010402; CCT domain
							0	JC_C100003068	Transketolase-like, pyrimidine-binding domain IPR005476; Transketolase, C-terminal IPR009014; Transketolase, C-terminal/Pyruvate-ferredoxin oxidoreductase, domain II
							1	JC_C100003075	Transcription factor, FAR1-related IPR006564; Zinc finger, PMZ-type IPR007527; Zinc finger, SWIM-type IPR018289; MULE transposase, conserved domain
							8	JC_C100003077	Allergen V5/Tpx-1 related IPR014044; SCP-like extracellular
							4	JC_C100003081	Octicosapeptide/Phox/Bem1p IPR000719; Protein kinase, catalytic domain IPR001245; Tyrosine-protein kinase, catalytic domain IPR002290; Serine/threonine-protein kinase domain IPR011009; Protein kinase-like domain IPR020635; Tyrosine-protein kinase, subgroup, catalytic domain
							8	JC_C100003084	Allergen V5/Tpx-1 related IPR014044; SCP-like extracellular
							3	JC_C100003085	Oxoglutarate/iron-dependent oxygenase
							7	JC_C100003086	-
							4	JC_C100003087	O-methyltransferase, family 2 IPR012967; Plant methyltransferase dimerisation
							2	JC_C100003095	Pyridoxal phosphate-dependent enzyme, beta subunit
							7	JC_C100003097	Cyclic nucleotide-binding IPR002110; Ankyrin repeat IPR005821; Ion transport IPR018490; Cyclic nucleotide-binding-like IPR020683; Ankyrin repeat-containing domain
							3	JC_C100003098	-
							4	JC_C100003101	Poly(A) polymerase, RNA-binding region IPR007012; Poly(A) polymerase, central region IPR011068; Nucleotidyltransferase, class I, C-terminal-like
							8	JC_C100003113	PAK-box/P21-Rho-binding IPR000198; RhoGAP IPR008936; Rho GTPase activation protein
							6	JC_C100003116	Calcium-binding EF-hand IPR018248; EF-Hand domain IPR018249; EF-HAND 2
							1	JC_C100003120	GO:0044464//cell part
							7	JC_C100003121	No apical meristem (NAM) protein
							4	JC_C100003124	Harpin-induced 1 IPR013990; Water Stress/Hypersensitive response domain
							2	JC_C100003127	Ribosomal protein S11
							0	JC_C100003129	-
							8	JC_C100003130	Transcription factor, MADS-box IPR002487; Transcription factor, K-box
							4	JC_C100003132	Glutaredoxin IPR012336; Thioredoxin-like fold
							1	JC_C100003134	Protein of unknown function DUF6, transmembrane
							4	JC_C100003136	Protein of unknown function DUF778
							2	JC_C100003137	Thioredoxin-like fold IPR013766; Thioredoxin domain IPR017936; Thioredoxin-like
							4	JC_C100003138	RNA recognition motif, RNP-1 IPR003954; RNA recognition, region 1
							1	JC_C100003139	Zinc finger, GATA-type
							8	JC_C100003141	Ribosomal RNA adenine methylase transferase IPR020598; Ribosomal RNA adenine methylase transferase, N-terminal
							1	JC_C100003144	Protein of unknown function DUF702
							4	JC_C100003147	ATP-binding region, ATPase-like
							2	JC_C100003149	D-galactoside/L-rhamnose binding SUEL lectin IPR001944; Glycoside hydrolase, family 35 IPR008979; Galactose-binding like IPR017853; Glycoside hydrolase, catalytic core
							6	JC_C100003150	GTP-binding protein SAR1 IPR006688; ADP-ribosylation factor IPR006689; ARF/SAR superfamily
							4	JC_C100003151	Cytochrome P450
							4	JC_C100003152	Deoxyribonuclease/rho motif-related TRAM IPR006638; Elongator protein 3/MiaB/NifB IPR007197; Radical SAM IPR013848; Methylthiotransferase, N-terminal
							8	JC_C100003154	Thioredoxin-like fold IPR013766; Thioredoxin domain IPR017936; Thioredoxin-like
							0	JC_C100003158	Thioredoxin-like fold IPR013766; Thioredoxin domain IPR017936; Thioredoxin-like
							8	JC_C100003160	Patatin IPR016035; Acyl transferase/acyl hydrolase/lysophospholipase
							6	JC_C100003163	-
							6	JC_C100003167	-
							8	JC_C100003170	Chorismate synthase
							2	JC_C100003172	Glutamine amidotransferase class-I, C-terminal IPR005801; ADC synthase IPR006805; Anthranilate synthase component I, N-terminal IPR015890; Chorismate binding, C-terminal IPR017926; Glutamine amidotransferase type 1
							0	JC_C100003174	Pentatricopeptide repeat
							4	JC_C100003175	Protein kinase, catalytic domain IPR002290; Serine/threonine-protein kinase domain IPR011009; Protein kinase-like domain IPR017442; Serine/threonine-protein kinase-like domain IPR020635; Tyrosine-protein kinase, subgroup, catalytic domain
							1	JC_C100003176	Calcium-binding EF-hand IPR018248; EF-Hand domain IPR018249; EF-HAND 2
							1	JC_C100003178	-
							8	JC_C100003179	-
							4	JC_C100003181	Glutathione S-transferase, N-terminal IPR004046; Glutathione S-transferase, C-terminal IPR010987; Glutathione S-transferase, C-terminal-like IPR012336; Thioredoxin-like fold IPR017933; Glutathione S-transferase/chloride channel, C-terminal
							0	JC_C100003184	GO:0031090//organelle membrane;GO:0043231//intracellular membrane-bounded organelle
							1	JC_C100003187	-
							1	JC_C100003190	Protein of unknown function DUF593
							2	JC_C100003194	Double-stranded RNA binding
							2	JC_C100003196	Carbohydrate/purine kinase
							4	JC_C100003199	C2 calcium-dependent membrane targeting IPR008973; C2 calcium/lipid-binding region, CaLB IPR018029; C2 membrane targeting protein
							6	JC_C100003207	C2 calcium-dependent membrane targeting IPR004014; ATPase, P-type cation-transporter, N-terminal IPR005834; Haloacid dehalogenase-like hydrolase IPR006068; ATPase, P-type cation-transporter, C-terminal IPR008250; ATPase, P-type, ATPase-associated region IPR008973; C2 calcium/lipid-binding region, CaLB
							0	JC_C100003211	Pentatricopeptide repeat
							4	JC_C100003216	DNA repair protein Rad4, transglutaminase-like domain IPR018326; DNA repair protein Rad4, DNA-binding domain 1 IPR018327; DNA repair protein Rad4, DNA-binding domain 2 IPR018328; DNA repair protein Rad4, DNA-binding domain 3
							7	JC_C100003221	Diacylglycerol kinase accessory region IPR001206; Diacylglycerol kinase, catalytic region IPR002182; NB-ARC
							3	JC_C100003222	GO:0016020//membrane
							0	JC_C100003228	Diacylglycerol kinase accessory region IPR001206; Diacylglycerol kinase, catalytic region IPR002182; NB-ARC
							2	JC_C100003230	Protein of unknown function DUF869, plant
							2	JC_C100003232	Zinc finger, RING-type IPR018957; Zinc finger, C3HC4 RING-type
							7	JC_C100003236	Leucine-rich repeat IPR002182; NB-ARC
							8	JC_C100003238	-
							1	JC_C100003240	Protein of unknown function DUF579, plant
							1	JC_C100003242	Nnf1
							8	JC_C100003244	UDP-glucuronosyl/UDP-glucosyltransferase
							6	JC_C100003245	UDP-glucuronosyl/UDP-glucosyltransferase
							4	JC_C100003246	UDP-glucuronosyl/UDP-glucosyltransferase
							7	JC_C100003247	Cystathionine beta-synthase, core
							1	JC_C100003251	GO:0009532//plastid stroma
							5	JC_C100003253	Uncharacterised protein family UPF0089 IPR009721; Protein of unknown function DUF1298
							3	JC_C100003255	Uncharacterised protein family UPF0089 IPR009721; Protein of unknown function DUF1298
							2	JC_C100003256	O-methyltransferase, family 3
							0	JC_C100003259	-
							4	JC_C100003260	NAD-dependent epimerase/dehydratase IPR016040; NAD(P)-binding domain
							4	JC_C100003262	Ribonuclease CAF1 IPR012337; Polynucleotidyl transferase, ribonuclease H fold
							2	JC_C100003263	Ferredoxin
							3	JC_C100003268	Major facilitator superfamily MFS-1 IPR016196; Major facilitator superfamily, general substrate transporter
							1	JC_C100003270	GO:0016020//membrane
							1	JC_C100003271	Protein of unknown function DUF620
							8	JC_C100003274	Homeodomain-like IPR014778; Myb, DNA-binding IPR017930; Myb-type HTH DNA-binding domain
							3	JC_C100003275	-
							8	JC_C100003277	Methyladenine glycosylase IPR011257; DNA glycosylase
							7	JC_C100003280	Cytochrome P450
							0	JC_C100003281	Protein of unknown function DUF668
							4	JC_C100003286	GO:0044464//cell part
							2	JC_C100003287	Protein of unknown function DUF1218
							0	JC_C100003289	Short-chain dehydrogenase/reductase SDR IPR016040; NAD(P)-binding domain
							2	JC_C100003291	Cystathionine beta-synthase, core
							4	JC_C100003294	Mlo-related protein
							8	JC_C100003295	AMP-dependent synthetase/ligase
							8	JC_C100003299	Domain of unknown function DUF1771
							4	JC_C100003300	Protein of unknown function DUF580
							3	JC_C100003301	-
							2	JC_C100003304	Plant metallothionein, family 15
							8	JC_C100003306	Protein kinase, catalytic domain IPR001680; WD40 repeat IPR002290; Serine/threonine-protein kinase domain IPR011009; Protein kinase-like domain IPR011046; WD40 repeat-like-containing domain IPR017442; Serine/threonine-protein kinase-like domain IPR017986; WD40-repeat-containing domain IPR019781; WD40 repeat, subgroup IPR019782; WD40 repeat 2
							2	JC_C100003308	GO:0016020//membrane;GO:0043231//intracellular membrane-bounded organelle
							4	JC_C100003312	Lanthionine synthetase C-like IPR008928; Six-hairpin glycosidase-like
							6	JC_C100003313	-
							4	JC_C100003317	Leucine-rich repeat IPR003591; Leucine-rich repeat, typical subtype
							1	JC_C100003323	Pentatricopeptide repeat
							3	JC_C100003324	Rare lipoprotein A IPR007112; Expansin 45, endoglucanase-like IPR007117; Pollen allergen/expansin, C-terminal IPR009009; Barwin-related endoglucanase
							4	JC_C100003328	Acylneuraminate cytidylyltransferase
							1	JC_C100003332	-
							8	JC_C100003334	Ubiquitin-conjugating enzyme, E2 IPR016135; Ubiquitin-conjugating enzyme/RWD-like
							6	JC_C100003336	Cytochrome c oxidase copper chaperone
							6	JC_C100003337	-
							2	JC_C100003338	Glycosyl transferase, family 14
							4	JC_C100003345	SNF2-related IPR001650; DNA/RNA helicase, C-terminal IPR014001; DEAD-like helicase, N-terminal IPR014021; Helicase, superfamily 1/2, ATP-binding domain
							1	JC_C100003349	Methyltransferase type 11
							4	JC_C100003355	Zinc finger, RING-CH-type IPR018957; Zinc finger, C3HC4 RING-type
							4	JC_C100003359	Glucose-inhibited division protein A-related
							4	JC_C100003362	Zinc finger, CCCH-type
							1	JC_C100003364	ABC transporter-like IPR003593; ATPase, AAA+ type, core IPR010509; ABC transporter, N-terminal IPR011527; ABC transporter, transmembrane region, type 1 IPR017940; ABC transporter integral membrane type 1
							4	JC_C100003368	Tetratricopeptide, MLP1/MLP2-like
							4	JC_C100003372	GO:0009532//plastid stroma
							5	JC_C100003374	-
							1	JC_C100003378	Ribonuclease P-related
							4	JC_C100003385	Alpha-D-phosphohexomutase, C-terminal IPR005844; Alpha-D-phosphohexomutase, alpha/beta/alpha domain I IPR005845; Alpha-D-phosphohexomutase, alpha/beta/alpha domain II IPR016055; Alpha-D-phosphohexomutase, alpha/beta/alpha I/II/III
							4	JC_C100003387	C2 calcium-dependent membrane targeting IPR008973; C2 calcium/lipid-binding region, CaLB IPR018029; C2 membrane targeting protein
							2	JC_C100003388	-
							7	JC_C100003390	CMP/dCMP deaminase, zinc-binding IPR016193; Cytidine deaminase-like
							4	JC_C100003393	Heat shock protein Hsp20 IPR008978; HSP20-like chaperone
							0	JC_C100003394	Harpin-induced 1
							8	JC_C100003395	-
							7	JC_C100003402	Pentatricopeptide repeat
							7	JC_C100003409	DNA topoisomerase, type IA, core IPR003601; DNA topoisomerase, type IA, domain 2 IPR003602; DNA topoisomerase, type IA, DNA-binding IPR006154; Toprim domain, subgroup IPR006171; Toprim domain IPR013497; DNA topoisomerase, type IA, central
							2	JC_C100003410	YTH domain
							3	JC_C100003411	Amino acid permease-associated region
							8	JC_C100003413	Mog1/PsbP/DUF1795, alpha/beta/alpha sandwich
							2	JC_C100003414	Transcriptional coactivator p15 IPR009044; ssDNA-binding transcriptional regulator
							4	JC_C100003416	FAD dependent oxidoreductase IPR010795; Prenylcysteine lyase
							1	JC_C100003417	Cyclin-like F-box
							1	JC_C100003419	Aldo/keto reductase
							8	JC_C100003424	Phosphatidylinositol 3-/4-kinase, catalytic IPR003151; PIK-related kinase, FAT IPR003152; PIK-related kinase, FATC IPR011009; Protein kinase-like domain IPR014009; PIK-related kinase
							4	JC_C100003425	UDP-glucuronosyl/UDP-glucosyltransferase
							8	JC_C100003430	Methyltransferase type 11 IPR013705; Sterol methyltransferase C-terminal
							3	JC_C100003434	Amino acid permease-associated region
							0	JC_C100003441	Smr protein/MutS2 C-terminal IPR002885; Pentatricopeptide repeat
							0	JC_C100003443	Major facilitator superfamily MFS-1 IPR016196; Major facilitator superfamily, general substrate transporter
							7	JC_C100003445	Major facilitator superfamily MFS-1 IPR016196; Major facilitator superfamily, general substrate transporter
							4	JC_C100003448	HEAT IPR001494; Importin-beta, N-terminal IPR016024; Armadillo-type fold
							2	JC_C100003450	ATPase, F1/V1/A1 complex, alpha/beta subunit, nucleotide-binding domain IPR000793; ATPase, F1/V1/A1 complex, alpha/beta subunit, C-terminal IPR004100; ATPase, F1/V1/A1 complex, alpha/beta subunit, N-terminal
							8	JC_C100003451	-
							8	JC_C100003452	Protein of unknown function DUF632 IPR006868; Protein of unknown function DUF630
							4	JC_C100003453	Protein phosphatase 2C-related IPR014045; Protein phosphatase 2C, N-terminal
							7	JC_C100003457	DOMON related IPR006593; Cytochrome b561/ferric reductase transmembrane IPR007613; Protein of unknown function DUF568, DOMON-like
							8	JC_C100003459	-
							1	JC_C100003461	Smr protein/MutS2 C-terminal IPR002885; Pentatricopeptide repeat
							4	JC_C100003462	Heavy metal transport/detoxification protein
							2	JC_C100003463	Armadillo IPR016024; Armadillo-type fold
							4	JC_C100003465	Inositol monophosphatase
							8	JC_C100003470	Sodium/sulphate symporter
							8	JC_C100003471	Cyclin-like F-box
							1	JC_C100003476	Haem peroxidase, animal IPR010255; Haem peroxidase
							8	JC_C100003477	XPG N-terminal IPR006086; XPG I IPR008918; Helix-hairpin-helix motif, class 2 IPR020045; 5'-3' exonuclease, C-terminal subdomain
							4	JC_C100003478	Ribosomal protein L15
							1	JC_C100003486	3-oxo-5-alpha-steroid 4-dehydrogenase, C-terminal IPR010721; Protein of unknown function DUF1295
							2	JC_C100003489	UbiA prenyltransferase
							4	JC_C100003491	Glycoside hydrolase, family 1 IPR017853; Glycoside hydrolase, catalytic core
							4	JC_C100003492	WD40 repeat IPR011046; WD40 repeat-like-containing domain IPR017986; WD40-repeat-containing domain IPR019781; WD40 repeat, subgroup IPR019782; WD40 repeat 2
							2	JC_C100003493	GO:0031224//intrinsic to membrane
							4	JC_C100003494	DNA/RNA helicase, C-terminal IPR011545; DNA/RNA helicase, DEAD/DEAH box type, N-terminal IPR014001; DEAD-like helicase, N-terminal IPR014014; RNA helicase, DEAD-box type, Q motif IPR014021; Helicase, superfamily 1/2, ATP-binding domain
							8	JC_C100003497	-
							2	JC_C100003504	WD40 repeat IPR003613; U box domain IPR011046; WD40 repeat-like-containing domain IPR013915; Pre-mRNA-splicing factor 19 IPR017986; WD40-repeat-containing domain IPR019781; WD40 repeat, subgroup IPR019782; WD40 repeat 2
							4	JC_C100003505	Protein of unknown function DUF26
							5	JC_C100003506	Pentatricopeptide repeat
							5	JC_C100003507	-
							4	JC_C100003509	RNA recognition motif, RNP-1 IPR002075; Nuclear transport factor 2 IPR018222; Nuclear transport factor 2, Eukaryote
							1	JC_C100003511	AUX/IAA protein IPR011525; Aux/IAA-ARF-dimerisation
							4	JC_C100003532	-
							6	JC_C100003533	AWPM-19-like
							4	JC_C100003536	DNA/RNA helicase, C-terminal IPR011545; DNA/RNA helicase, DEAD/DEAH box type, N-terminal IPR014001; DEAD-like helicase, N-terminal IPR014014; RNA helicase, DEAD-box type, Q motif IPR014021; Helicase, superfamily 1/2, ATP-binding domain
							8	JC_C100003537	Ammonium transporter
							3	JC_C100003539	-
							4	JC_C100003541	C2 calcium-dependent membrane targeting IPR002921; Lipase, class 3 IPR008973; C2 calcium/lipid-binding region, CaLB IPR018029; C2 membrane targeting protein
							7	JC_C100003542	IQ calmodulin-binding region IPR001609; Myosin head, motor region IPR002710; Dilute IPR004009; Myosin, N-terminal, SH3-like IPR018444; Dil domain
							2	JC_C100003544	Cyclin-like F-box
							1	JC_C100003547	Pectate lyase/Amb allergen IPR011050; Pectin lyase fold/virulence factor
							3	JC_C100003548	Protein kinase, catalytic domain IPR002290; Serine/threonine-protein kinase domain IPR011009; Protein kinase-like domain IPR017442; Serine/threonine-protein kinase-like domain IPR020635; Tyrosine-protein kinase, subgroup, catalytic domain
							4	JC_C100003549	-
							8	JC_C100003553	CCT domain
							1	JC_C100003555	TLDc
							1	JC_C100003557	GO:0043231//intracellular membrane-bounded organelle
							1	JC_C100003564	SET IPR003105; SRA-YDG IPR003606; Pre-SET zinc-binding sub-group IPR007728; Pre-SET zinc-binding region
							2	JC_C100003565	Surfeit locus 6
							1	JC_C100003566	Biopterin transport-related protein BT1 IPR016196; Major facilitator superfamily, general substrate transporter
							1	JC_C100003568	Haloacid dehalogenase-like hydrolase
							4	JC_C100003570	-
							4	JC_C100003574	-
							7	JC_C100003576	Glutathione S-transferase, N-terminal IPR004046; Glutathione S-transferase, C-terminal IPR010987; Glutathione S-transferase, C-terminal-like IPR012336; Thioredoxin-like fold IPR017933; Glutathione S-transferase/chloride channel, C-terminal
							7	JC_C100003577	Glutathione S-transferase, N-terminal IPR004046; Glutathione S-transferase, C-terminal IPR010987; Glutathione S-transferase, C-terminal-like IPR012336; Thioredoxin-like fold IPR017933; Glutathione S-transferase/chloride channel, C-terminal
							6	JC_C100003578	Plant self-incompatibility S1
							1	JC_C100003581	Zinc finger, PHD-type IPR011011; Zinc finger, FYVE/PHD-type IPR019787; Zinc finger, PHD-finger
							8	JC_C100003582	Ham1-like protein
							3	JC_C100003583	HhH-GPD domain IPR003651; Endonuclease III-like, iron-sulphur cluster loop motif IPR011257; DNA glycosylase
							4	JC_C100003584	Protein kinase, catalytic domain IPR001611; Leucine-rich repeat IPR002290; Serine/threonine-protein kinase domain IPR003591; Leucine-rich repeat, typical subtype IPR011009; Protein kinase-like domain IPR013210; Leucine-rich repeat, N-terminal IPR017442; Serine/threonine-protein kinase-like domain IPR020635; Tyrosine-protein kinase, subgroup, catalytic domain
							1	JC_C100003586	Calcium-binding EF-hand IPR018248; EF-Hand domain IPR018249; EF-HAND 2
							7	JC_C100003592	Pentatricopeptide repeat
							2	JC_C100003594	Bacterial Fmu (Sun)/eukaryotic nucleolar NOL1/Nop2p
							0	JC_C100003599	Cytochrome b6-f complex Fe-S subunit IPR017941; Rieske [2Fe-2S] iron-sulphur domain
							4	JC_C100003602	Haloacid dehalogenase-like hydrolase IPR008250; ATPase, P-type, ATPase-associated region
							4	JC_C100003605	Transcription factor, FAR1-related IPR006564; Zinc finger, PMZ-type IPR007527; Zinc finger, SWIM-type IPR018289; MULE transposase, conserved domain
							1	JC_C100003607	Zinc finger, DHHC-type
							2	JC_C100003609	Aminotransferase class-III IPR015424; Pyridoxal phosphate-dependent transferase, major region
							2	JC_C100003610	Prefoldin
							0	JC_C100003611	GRAS transcription factor
							0	JC_C100003612	GO:0031410//cytoplasmic vesicle
							4	JC_C100003613	-
							7	JC_C100003614	-
							4	JC_C100003615	SANT, DNA-binding IPR009057; Homeodomain-like IPR014778; Myb, DNA-binding IPR017877; MYB-like IPR017930; Myb-type HTH DNA-binding domain
							8	JC_C100003617	Zinc finger, RING-type IPR001965; Zinc finger, PHD-type IPR003105; SRA-YDG IPR011011; Zinc finger, FYVE/PHD-type IPR018957; Zinc finger, C3HC4 RING-type
							8	JC_C100003622	Breast carcinoma amplified sequence 2
							1	JC_C100003624	Protein synthesis factor, GTP-binding IPR004160; Translation elongation factor EFTu/EF1A, C-terminal IPR004161; Translation elongation factor EFTu/EF1A, domain 2 IPR009000; Translation elongation/initiation factor/Ribosomal, beta-barrel IPR009001; Translation elongation factor EF1A/initiation factor IF2gamma, C-terminal
							1	JC_C100003627	GO:0009536//plastid
							8	JC_C100003631	Aminotransferase, class I/II IPR015424; Pyridoxal phosphate-dependent transferase, major region
							7	JC_C100003633	Galactose-binding like IPR013784; Carbohydrate-binding-like fold
							5	JC_C100003634	Heavy metal transport/detoxification protein
							4	JC_C100003639	UbiA prenyltransferase
							7	JC_C100003643	Ribosomal protein L44e IPR011332; Ribosomal protein, zinc-binding
							4	JC_C100003644	Hyccin
							1	JC_C100003648	Aminoacyl-tRNA synthetase, class II (D/K/N) IPR004365; Nucleic acid binding, OB-fold, tRNA/helicase-type IPR006195; Aminoacyl-tRNA synthetase, class II, conserved region IPR016027; Nucleic acid-binding, OB-fold-like
							7	JC_C100003650	-
							1	JC_C100003662	Kinesin, motor region
							4	JC_C100003665	PUR-alpha/beta/gamma, DNA/RNA-binding
							7	JC_C100003668	Leucine-rich repeat IPR003591; Leucine-rich repeat, typical subtype IPR013210; Leucine-rich repeat, N-terminal
							0	JC_C100003669	Leucine-rich repeat IPR003591; Leucine-rich repeat, typical subtype IPR013210; Leucine-rich repeat, N-terminal
							6	JC_C100003670	PDZ/DHR/GLGF IPR013026; Tetratricopeptide region
							8	JC_C100003671	Pumilio RNA-binding region IPR016024; Armadillo-type fold
							1	JC_C100003674	Protein kinase, catalytic domain IPR002290; Serine/threonine-protein kinase domain IPR011009; Protein kinase-like domain IPR017442; Serine/threonine-protein kinase-like domain IPR020635; Tyrosine-protein kinase, subgroup, catalytic domain
							2	JC_C100003675	Zinc finger, RING-type IPR018957; Zinc finger, C3HC4 RING-type
							4	JC_C100003680	Arginyl tRNA synthetase, class Ic, N-terminal IPR008909; DALR anticodon binding IPR009080; Aminoacyl-tRNA synthetase, class 1a, anticodon-binding IPR015945; Arginyl-tRNA synthetase, class Ic, core
							2	JC_C100003687	RNA-binding S4 IPR005824; KOW IPR013843; Ribosomal protein S4e, N-terminal IPR013845; Ribosomal protein S4e, central
							6	JC_C100003690	DNA/RNA helicase, C-terminal IPR007502; Helicase-associated region IPR011709; Domain of unknown function DUF1605 IPR014021; Helicase, superfamily 1/2, ATP-binding domain
							8	JC_C100003693	Lipase, class 3
							1	JC_C100003695	FBD
							4	JC_C100003696	C2 calcium/lipid-binding region, CaLB IPR014019; Phosphatase tensin type IPR014020; Tensin phosphatase, C2 domain
							1	JC_C100003698	Cyclin, C-terminal IPR006670; Cyclin IPR006671; Cyclin, N-terminal IPR011028; Cyclin-like
							4	JC_C100003704	MATH IPR008974; TRAF-like
							8	JC_C100003708	MATH IPR008974; TRAF-like
							1	JC_C100003710	-
							8	JC_C100003711	Leucine-rich repeat IPR003591; Leucine-rich repeat, typical subtype IPR013210; Leucine-rich repeat, N-terminal
							4	JC_C100003713	Divalent ion symporter
							1	JC_C100003715	Leucine-rich repeat
							2	JC_C100003716	DNA-directed RNA polymerase, RBP11-like IPR011261; DNA-directed RNA polymerase, dimerisation IPR011262; DNA-directed RNA polymerase, insert IPR011263; DNA-directed RNA polymerase, RpoA/D/Rpb3-type
							7	JC_C100003717	Root cap
							8	JC_C100003719	Putative cyclase
							7	JC_C100003723	GTP-binding protein SAR1 IPR006688; ADP-ribosylation factor IPR006689; ARF/SAR superfamily
							1	JC_C100003724	Amino acid-binding ACT IPR006139; D-isomer specific 2-hydroxyacid dehydrogenase, catalytic region IPR006140; D-isomer specific 2-hydroxyacid dehydrogenase, NAD-binding IPR016040; NAD(P)-binding domain
							1	JC_C100003725	Protein of unknown function DUF303, acetylesterase putative
							0	JC_C100003729	-
							4	JC_C100003734	Sel1-like
							1	JC_C100003736	Leucine-rich repeat
							4	JC_C100003737	GO:0009534//chloroplast thylakoid
							1	JC_C100003738	Pentatricopeptide repeat
							8	JC_C100003740	-
							2	JC_C100003744	Translation initiation factor IF6
							4	JC_C100003747	Telomere end binding protein IPR016027; Nucleic acid-binding, OB-fold-like
							0	JC_C100003756	Peptidase S10, serine carboxypeptidase
							7	JC_C100003757	-
							7	JC_C100003764	Peptidase S10, serine carboxypeptidase
							4	JC_C100003767	Peptidase S10, serine carboxypeptidase
							4	JC_C100003771	Pyruvate carboxyltransferase
							8	JC_C100003774	LrgB-like protein
							4	JC_C100003778	DNA/RNA helicase, C-terminal IPR011545; DNA/RNA helicase, DEAD/DEAH box type, N-terminal IPR014001; DEAD-like helicase, N-terminal IPR014014; RNA helicase, DEAD-box type, Q motif IPR014021; Helicase, superfamily 1/2, ATP-binding domain
							2	JC_C100003780	Phosphoribulokinase/uridine kinase
							0	JC_C100003788	UspA
							6	JC_C100003789	Frataxin-like
							0	JC_C100003790	-
							0	JC_C100003792	GO:0043231//intracellular membrane-bounded organelle
							4	JC_C100003794	Leucine-rich repeat IPR003591; Leucine-rich repeat, typical subtype
							8	JC_C100003795	Zinc finger, B-box
							4	JC_C100003798	Glycosyl transferase, family 14 IPR004949; Protein of unknown function DUF266, plant
							7	JC_C100003802	Transcription factor, MADS-box
							1	JC_C100003807	Pentatricopeptide repeat
							5	JC_C100003809	Oxysterol-binding protein
							4	JC_C100003813	Methyltransferase type 11
							1	JC_C100003815	Auxin efflux carrier
							1	JC_C100003818	Amidase IPR001440; Tetratricopeptide TPR-1 IPR013026; Tetratricopeptide region IPR019734; Tetratricopeptide repeat
							4	JC_C100003819	Glutaredoxin IPR004046; Glutathione S-transferase, C-terminal IPR010987; Glutathione S-transferase, C-terminal-like IPR012336; Thioredoxin-like fold
							4	JC_C100003821	Calcium-binding EF-hand IPR018248; EF-Hand domain IPR018249; EF-HAND 2
							8	JC_C100003824	Homeobox IPR009057; Homeodomain-like
							1	JC_C100003836	Glycosyl transferase, family 48
							7	JC_C100003837	-
							8	JC_C100003839	U box domain IPR016024; Armadillo-type fold
							5	JC_C100003840	Fatty acid desaturase, type 1
							5	JC_C100003843	Bet v I allergen
							5	JC_C100003844	Bet v I allergen
							4	JC_C100003850	Homogentisate 1,2-dioxygenase IPR011051; Cupin, RmlC-type
							0	JC_C100003851	Basic-leucine zipper (bZIP) transcription factor IPR011700; Basic leucine zipper
							4	JC_C100003854	-
							8	JC_C100003857	Calcium-binding EF-hand IPR004837; Sodium/calcium exchanger membrane region IPR018249; EF-HAND 2
							5	JC_C100003861	NmrA-like IPR016040; NAD(P)-binding domain
							4	JC_C100003863	RNA recognition motif, RNP-1
							3	JC_C100003864	Bet v I allergen
							3	JC_C100003865	Cytochrome P450
							1	JC_C100003869	-
							4	JC_C100003871	GroES-like IPR013149; Alcohol dehydrogenase, zinc-binding IPR013154; Alcohol dehydrogenase GroES-like IPR016040; NAD(P)-binding domain IPR020843; Polyketide synthase, enoylreductase
							0	JC_C100003872	Homeobox IPR009057; Homeodomain-like
							2	JC_C100003875	Ran GTPase IPR003577; Ras small GTPase, Ras type IPR003578; Ras small GTPase, Rho type IPR003579; Ras small GTPase, Rab type IPR013753; Ras
							7	JC_C100003880	Protein kinase, catalytic domain IPR000858; S-locus glycoprotein IPR002290; Serine/threonine-protein kinase domain IPR003609; Apple-like IPR011009; Protein kinase-like domain IPR013227; PAN-2 domain IPR017442; Serine/threonine-protein kinase-like domain IPR020635; Tyrosine-protein kinase, subgroup, catalytic domain
							1	JC_C100003882	-
							4	JC_C100003883	Transcription factor, TCP IPR017887; Transcription factor TCP subgroup
							4	JC_C100003888	-
							1	JC_C100003891	C2 calcium-dependent membrane targeting IPR008973; C2 calcium/lipid-binding region, CaLB
							4	JC_C100003895	GO:0043231//intracellular membrane-bounded organelle
							1	JC_C100003896	Protein kinase, catalytic domain IPR001245; Tyrosine-protein kinase, catalytic domain IPR001611; Leucine-rich repeat IPR002290; Serine/threonine-protein kinase domain IPR011009; Protein kinase-like domain IPR013210; Leucine-rich repeat, N-terminal IPR020635; Tyrosine-protein kinase, subgroup, catalytic domain
							7	JC_C100003897	KIP1-like
							8	JC_C100003898	-
							8	JC_C100003900	SNF2-related
							6	JC_C100003902	-
							8	JC_C100003904	DNA-binding WRKY
							4	JC_C100003909	Protein kinase, catalytic domain IPR001611; Leucine-rich repeat IPR002290; Serine/threonine-protein kinase domain IPR003591; Leucine-rich repeat, typical subtype IPR011009; Protein kinase-like domain IPR013210; Leucine-rich repeat, N-terminal IPR017442; Serine/threonine-protein kinase-like domain IPR020635; Tyrosine-protein kinase, subgroup, catalytic domain
							7	JC_C100003911	Chalcone isomerase, subgroup IPR016087; Chalcone isomerase
							1	JC_C100003912	Basic-leucine zipper (bZIP) transcription factor IPR011616; bZIP transcription factor, bZIP-1
							2	JC_C100003913	Dihydropteroate synthase, DHPS IPR000550; 7,8-Dihydro-6-hydroxymethylpterin-pyrophosphokinase, HPPK IPR011005; Dihydropteroate synthase-like
							5	JC_C100003914	Rare lipoprotein A IPR007112; Expansin 45, endoglucanase-like IPR007117; Pollen allergen/expansin, C-terminal IPR009009; Barwin-related endoglucanase
							1	JC_C100003919	Appr-1-p processing
							0	JC_C100003922	Toll-Interleukin receptor
							5	JC_C100003923	Peptidase S10, serine carboxypeptidase
							8	JC_C100003925	-
							8	JC_C100003926	-
							2	JC_C100003927	K+ potassium transporter
							4	JC_C100003931	Protein of unknown function DUF2044, membrane
							8	JC_C100003935	Lateral organ boundaries, LOB
							1	JC_C100003936	Haem peroxidase, plant/fungal/bacterial IPR010255; Haem peroxidase
							1	JC_C100003937	Hypoxia induced protein, conserved region
							0	JC_C100003938	Pentatricopeptide repeat
							3	JC_C100003945	-
							4	JC_C100003946	-
							8	JC_C100003950	WD40 repeat IPR011046; WD40 repeat-like-containing domain
							8	JC_C100003952	Protein kinase, catalytic domain IPR000961; AGC-kinase, C-terminal IPR002290; Serine/threonine-protein kinase domain IPR011009; Protein kinase-like domain IPR017442; Serine/threonine-protein kinase-like domain IPR017892; Protein kinase, C-terminal IPR020635; Tyrosine-protein kinase, subgroup, catalytic domain
							8	JC_C100003953	Alpha/beta hydrolase fold-1
							4	JC_C100003955	Translation initiation factor 1A (eIF-1A) IPR006196; S1, IF1 type IPR016027; Nucleic acid-binding, OB-fold-like
							0	JC_C100003962	Transmembrane receptor, eukaryota
							1	JC_C100003964	NAD-dependent glycerol-3-phosphate dehydrogenase, C-terminal IPR008927; 6-phosphogluconate dehydrogenase, C-terminal-like IPR011128; NAD-dependent glycerol-3-phosphate dehydrogenase, N-terminal IPR016040; NAD(P)-binding domain
							4	JC_C100003969	tRNA-binding region IPR016027; Nucleic acid-binding, OB-fold-like
							1	JC_C100003972	-
							2	JC_C100003973	Protein of unknown function DUF1664
							1	JC_C100003974	GO:0009536//plastid
							1	JC_C100003975	-
							4	JC_C100003977	Reticulon
							0	JC_C100003979	N2,N2-dimethylguanosine tRNA methyltransferase
							1	JC_C100003981	Dual specificity phosphatase, catalytic domain IPR000387; Dual-specific/protein-tyrosine phosphatase, conserved region IPR020422; Dual specificity phosphatase, subgroup, catalytic domain
							7	JC_C100003982	Xanthine/uracil/vitamin C permease
							0	JC_C100003983	Protein kinase, catalytic domain IPR002290; Serine/threonine-protein kinase domain IPR004041; NAF domain IPR011009; Protein kinase-like domain IPR017442; Serine/threonine-protein kinase-like domain IPR018451; NAF/FISL domain IPR020635; Tyrosine-protein kinase, subgroup, catalytic domain
							1	JC_C100003988	High mobility group, superfamily
							8	JC_C100003990	Protein of unknown function DUF827, plant
							7	JC_C100003992	Oligopeptide transporter IPR016196; Major facilitator superfamily, general substrate transporter
							1	JC_C100003994	GO:0043231//intracellular membrane-bounded organelle
							1	JC_C100003995	Amino acid transporter, transmembrane
							4	JC_C100003997	Amino acid transporter, transmembrane
							4	JC_C100003998	Staphylococcal nuclease (SNase-like) IPR016071; Staphylococcal nuclease (SNase-like), OB-fold
							1	JC_C100004000	DNA/RNA helicase, C-terminal IPR006935; Restriction endonuclease, type I, R subunit/Type III, Res subunit IPR014001; DEAD-like helicase, N-terminal IPR014021; Helicase, superfamily 1/2, ATP-binding domain
							1	JC_C100004005	Protein of unknown function DUF246, plant
							1	JC_C100004013	GO:0043231//intracellular membrane-bounded organelle
							6	JC_C100004014	SANT, DNA-binding IPR009057; Homeodomain-like IPR014778; Myb, DNA-binding IPR017930; Myb-type HTH DNA-binding domain
							7	JC_C100004019	Zinc finger, C2H2-type IPR015880; Zinc finger, C2H2-like
							3	JC_C100004020	-
							5	JC_C100004021	-
							4	JC_C100004029	HAD-superfamily hydrolase, subfamily IG, 5'-nucleotidase
							8	JC_C100004031	X8
							3	JC_C100004032	-
							7	JC_C100004034	Pectinesterase, catalytic IPR011050; Pectin lyase fold/virulence factor
							4	JC_C100004036	Transcription factor, FAR1-related IPR006564; Zinc finger, PMZ-type IPR007527; Zinc finger, SWIM-type IPR018289; MULE transposase, conserved domain
							1	JC_C100004038	Pleckstrin/G-protein, interacting region IPR002109; Glutaredoxin IPR006869; Protein of unknown function DUF547 IPR012336; Thioredoxin-like fold
							8	JC_C100004040	Protein kinase, catalytic domain IPR001611; Leucine-rich repeat IPR002290; Serine/threonine-protein kinase domain IPR011009; Protein kinase-like domain IPR013210; Leucine-rich repeat, N-terminal IPR017442; Serine/threonine-protein kinase-like domain IPR020635; Tyrosine-protein kinase, subgroup, catalytic domain
							1	JC_C100004053	-
							4	JC_C100004056	Arf GTPase activating protein IPR001849; Pleckstrin homology IPR002110; Ankyrin repeat IPR004148; BAR IPR020683; Ankyrin repeat-containing domain
							5	JC_C100004058	DNA-binding WRKY
							4	JC_C100004059	GO:0009528//plastid inner membrane
							1	JC_C100004063	UDP-glucuronosyl/UDP-glucosyltransferase
							8	JC_C100004064	Rare lipoprotein A IPR007112; Expansin 45, endoglucanase-like IPR009009; Barwin-related endoglucanase
							2	JC_C100004067	Aminoglycoside phosphotransferase IPR011009; Protein kinase-like domain
							7	JC_C100004069	-
							8	JC_C100004070	Protein kinase, catalytic domain IPR001245; Tyrosine-protein kinase, catalytic domain IPR001611; Leucine-rich repeat IPR002290; Serine/threonine-protein kinase domain IPR011009; Protein kinase-like domain IPR013210; Leucine-rich repeat, N-terminal IPR020635; Tyrosine-protein kinase, subgroup, catalytic domain
							8	JC_C100004072	Pentatricopeptide repeat
							3	JC_C100004073	Paired amphipathic helix
							8	JC_C100004074	Reticulon
							1	JC_C100004075	Protein of unknown function DUF1168
							4	JC_C100004085	AB-hydrolase associated lipase region
							5	JC_C100004089	Cyclin-like F-box IPR006527; F-box associated
							0	JC_C100004090	DNA-repair protein, UmuC-like IPR017961; DNA polymerase, Y-family, little finger domain IPR017963; DNA-repair protein, UmuC-like, N-terminal
							8	JC_C100004092	ATPase, AAA+ type, core IPR003959; ATPase, AAA-type, core
							7	JC_C100004094	SAM dependent carboxyl methyltransferase
							6	JC_C100004095	SAM dependent carboxyl methyltransferase
							0	JC_C100004097	Phosphatidic acid phosphatase type 2/haloperoxidase
							4	JC_C100004099	Phosphatidic acid phosphatase type 2/haloperoxidase
							8	JC_C100004101	ATPase, AAA+ type, core IPR003959; ATPase, AAA-type, core
							4	JC_C100004103	Uncharacterised conserved protein UCP033271 IPR009215; TIM-barrel signal transduction protein, predicted
							5	JC_C100004104	Heavy metal transport/detoxification protein
							5	JC_C100004105	-
							8	JC_C100004106	Pentatricopeptide repeat
							5	JC_C100004108	Bet v I allergen
							4	JC_C100004110	GTP-binding protein, HSR1-related IPR004044; K Homology, type 2 IPR009019; K Homology, prokaryotic type
							0	JC_C100004111	Reverse transcriptase, RNA-dependent DNA polymerase
							4	JC_C100004112	-
							1	JC_C100004113	Protein kinase, catalytic domain IPR001611; Leucine-rich repeat IPR002290; Serine/threonine-protein kinase domain IPR011009; Protein kinase-like domain IPR017442; Serine/threonine-protein kinase-like domain IPR020635; Tyrosine-protein kinase, subgroup, catalytic domain
							4	JC_C100004115	PGAP1-like
							1	JC_C100004120	GO:0005622//intracellular
							0	JC_C100004124	Ubiquitin-conjugating enzyme, E2 IPR016135; Ubiquitin-conjugating enzyme/RWD-like
							7	JC_C100004125	-
							4	JC_C100004127	Protein of unknown function DUF616
							0	JC_C100004130	Protein kinase, catalytic domain IPR001245; Tyrosine-protein kinase, catalytic domain IPR001611; Leucine-rich repeat IPR002290; Serine/threonine-protein kinase domain IPR003591; Leucine-rich repeat, typical subtype IPR011009; Protein kinase-like domain IPR020635; Tyrosine-protein kinase, subgroup, catalytic domain
							1	JC_C100004134	Mitochodrial transcription termination factor-related
							1	JC_C100004136	Aminotransferase, class I/II IPR015424; Pyridoxal phosphate-dependent transferase, major region
							4	JC_C100004139	Protein of unknown function DUF803
							4	JC_C100004140	Biotin/lipoyl attachment IPR001078; 2-oxoacid dehydrogenase acyltransferase, catalytic domain IPR004167; E3 binding IPR011053; Single hybrid motif
							4	JC_C100004142	-
							4	JC_C100004144	-
							7	JC_C100004151	Prenyltransferase/squalene oxidase IPR008930; Terpenoid cylases/protein prenyltransferase alpha-alpha toroid
							3	JC_C100004152	-
							1	JC_C100004158	-
							0	JC_C100004159	Mitochodrial transcription termination factor-related
							8	JC_C100004161	Signal transduction response regulator, receiver region IPR010402; CCT domain IPR011006; CheY-like
							8	JC_C100004163	Harpin-induced 1
							4	JC_C100004165	DNA/RNA helicase, C-terminal IPR011545; DNA/RNA helicase, DEAD/DEAH box type, N-terminal IPR012961; DSH, C-terminal IPR014001; DEAD-like helicase, N-terminal IPR014021; Helicase, superfamily 1/2, ATP-binding domain
							4	JC_C100004166	Ribosomal protein S30Ae/sigma 54 modulation protein
							0	JC_C100004167	GO:0030312//external encapsulating structure
							8	JC_C100004172	Cytochrome P450
							5	JC_C100004173	Cytochrome P450
							0	JC_C100004176	C2 calcium-dependent membrane targeting IPR008973; C2 calcium/lipid-binding region, CaLB IPR013583; Phosphoribosyltransferase C-terminal, plant IPR018029; C2 membrane targeting protein
							4	JC_C100004178	Protein of unknown function DUF773
							1	JC_C100004180	D111/G-patch
							7	JC_C100004181	-
							1	JC_C100004182	ENT IPR014002; Tudor-like, plant
							1	JC_C100004183	Nse4
							2	JC_C100004185	Zinc finger, CCCH-type IPR004087; K Homology IPR004088; K Homology, type 1 IPR018111; K Homology, type 1, subgroup
							8	JC_C100004187	VQ
							8	JC_C100004188	DNA polymerase alpha/epsilon, subunit B
							8	JC_C100004189	-
							4	JC_C100004191	Protein phosphatase 2C-related IPR014045; Protein phosphatase 2C, N-terminal
							4	JC_C100004194	Heat shock protein DnaJ, N-terminal
							1	JC_C100004200	Cation efflux protein
							1	JC_C100004203	WRC
							8	JC_C100004207	Homeobox IPR003106; Leucine zipper, homeobox-associated IPR009057; Homeodomain-like
							1	JC_C100004211	Spc97/Spc98
							2	JC_C100004213	Activator of Hsp90 ATPase homologue 1-like IPR015310; Activator of Hsp90 ATPase, N-terminal
							6	JC_C100004215	Leucine-rich repeat IPR013210; Leucine-rich repeat, N-terminal
							3	JC_C100004216	Basic-leucine zipper (bZIP) transcription factor IPR011616; bZIP transcription factor, bZIP-1
							2	JC_C100004219	C2 calcium-dependent membrane targeting IPR008973; C2 calcium/lipid-binding region, CaLB IPR013583; Phosphoribosyltransferase C-terminal, plant IPR018029; C2 membrane targeting protein
							8	JC_C100004220	Rhodanese-like
							2	JC_C100004221	Mitochondrial inner membrane translocase complex, subunit Tim17/22
							8	JC_C100004222	Protein kinase, catalytic domain IPR001611; Leucine-rich repeat IPR002290; Serine/threonine-protein kinase domain IPR011009; Protein kinase-like domain IPR013210; Leucine-rich repeat, N-terminal IPR017442; Serine/threonine-protein kinase-like domain IPR020635; Tyrosine-protein kinase, subgroup, catalytic domain
							0	JC_C100004223	Transcription factor, SBP-box
							1	JC_C100004224	-
							6	JC_C100004225	-
							0	JC_C100004226	Mitochodrial transcription termination factor-related
							0	JC_C100004228	Mitochodrial transcription termination factor-related
							4	JC_C100004230	RNA recognition motif, RNP-1
							1	JC_C100004233	Heat shock protein DnaJ, N-terminal
							2	JC_C100004236	NAD(P)-binding domain
							6	JC_C100004237	Late embryogenesis abundant (LEA) group 1
							1	JC_C100004239	GO:0009570//chloroplast stroma
							1	JC_C100004241	Actin/actin-like
							7	JC_C100004245	-
							4	JC_C100004246	Protein of unknown function DUF231, plant
							5	JC_C100004247	Protein kinase, catalytic domain IPR001245; Tyrosine-protein kinase, catalytic domain IPR002290; Serine/threonine-protein kinase domain IPR011009; Protein kinase-like domain IPR020635; Tyrosine-protein kinase, subgroup, catalytic domain
							8	JC_C100004248	Zinc finger, RING-type IPR008974; TRAF-like IPR013010; Zinc finger, SIAH-type IPR018121; Seven in absentia protein, TRAF-like domain
							7	JC_C100004251	Methylpurine-DNA glycosylase (MPG) IPR011034; Formyl transferase, C-terminal-like
							4	JC_C100004253	Phosphoribosyltransferase
							4	JC_C100004254	WD40 repeat IPR011046; WD40 repeat-like-containing domain IPR017986; WD40-repeat-containing domain IPR019781; WD40 repeat, subgroup IPR019782; WD40 repeat 2
							0	JC_C100004255	Pentatricopeptide repeat
							4	JC_C100004256	ATPase, AAA+ type, core IPR013093; ATPase associated with various cellular activities, AAA-2 IPR019489; Clp ATPase, C-terminal
							7	JC_C100004257	Carbohydrate/purine kinase
							1	JC_C100004258	Zinc finger, PHD-type IPR011011; Zinc finger, FYVE/PHD-type IPR019787; Zinc finger, PHD-finger
							0	JC_C100004260	ATPase, AAA+ type, core
							7	JC_C100004264	Carotenoid oxygenase
							0	JC_C100004268	Protein of unknown function DUF1218
							4	JC_C100004273	Strictosidine synthase, conserved region
							2	JC_C100004275	Haloacid dehalogenase-like hydrolase
							8	JC_C100004276	Kinesin, motor region
							7	JC_C100004277	Basic helix-loop-helix dimerisation region bHLH IPR011598; Helix-loop-helix DNA-binding
							2	JC_C100004283	Protein of unknown function DUF647
							4	JC_C100004285	-
							0	JC_C100004286	Chlorophyll A-B binding protein
							1	JC_C100004289	Nucleoside phosphatase GDA1/CD39
							7	JC_C100004292	ABC transporter-like IPR003593; ATPase, AAA+ type, core IPR013525; ABC-2 type transporter
							4	JC_C100004301	Signal transduction response regulator, receiver region IPR011006; CheY-like
							4	JC_C100004302	Ribosomal biogenesis, methyltransferase, EMG1/NEP1
							4	JC_C100004305	GO:0031410//cytoplasmic vesicle
							4	JC_C100004308	Glycosyl transferase, family 8
							5	JC_C100004309	Peroxisome membrane protein, Pex16
							1	JC_C100004312	-
							1	JC_C100004316	Zinc finger, BED-type predicted IPR008906; HAT dimerisation
							7	JC_C100004322	Multi antimicrobial extrusion protein MatE
							8	JC_C100004328	Pentatricopeptide repeat
							6	JC_C100004330	-
							4	JC_C100004331	Aminotransferase, class V/Cysteine desulfurase IPR015424; Pyridoxal phosphate-dependent transferase, major region
							7	JC_C100004344	Lipase, GDSL
							4	JC_C100004348	Amino acid permease-associated region
							8	JC_C100004354	GO:0030964;GO:0005746//mitochondrial respiratory chain
							4	JC_C100004358	-
							0	JC_C100004359	Like-Sm ribonucleoprotein, core IPR006649; Like-Sm ribonucleoprotein, core domain, eukaryotic/archaea-type IPR010920; Like-Sm ribonucleoprotein-related, core
							1	JC_C100004360	EGF-like calcium-binding IPR003137; Protease-associated PA IPR009030; Growth factor, receptor
							1	JC_C100004361	Pentatricopeptide repeat
							4	JC_C100004362	SET IPR015353; Rubisco LSMT substrate-binding
							4	JC_C100004363	Ribosomal protein S27/S33, mitochondrial
							2	JC_C100004366	Molybdenum cofactor sulfurase, C-terminal IPR005303; MOSC, N-terminal beta barrel IPR011037; Pyruvate kinase, beta-barrel-like
							2	JC_C100004369	Molybdenum cofactor sulfurase, C-terminal IPR005303; MOSC, N-terminal beta barrel IPR011037; Pyruvate kinase, beta-barrel-like
							0	JC_C100004372	Protein kinase, catalytic domain IPR002290; Serine/threonine-protein kinase domain IPR011009; Protein kinase-like domain IPR017442; Serine/threonine-protein kinase-like domain IPR020635; Tyrosine-protein kinase, subgroup, catalytic domain
							8	JC_C100004377	NB-ARC
							4	JC_C100004378	Leucine-rich repeat IPR003591; Leucine-rich repeat, typical subtype IPR013210; Leucine-rich repeat, N-terminal
							0	JC_C100004383	-
							6	JC_C100004385	Ovarian tumour, otubain
							1	JC_C100004389	Armadillo IPR003613; U box domain IPR016024; Armadillo-type fold
							4	JC_C100004390	FAD dependent oxidoreductase
							1	JC_C100004391	Transcription initiation factor IIF, alpha subunit IPR011039; Transcription Factor IIF, Rap30/Rap74, interaction
							8	JC_C100004392	Amine oxidase IPR007526; SWIRM
							8	JC_C100004394	RNA recognition motif, RNP-1 IPR001878; Zinc finger, CCHC-type
							1	JC_C100004396	ATPase, AAA+ type, core IPR003959; ATPase, AAA-type, core
							4	JC_C100004403	GO:0043229//intracellular organelle
							2	JC_C100004406	No apical meristem (NAM) protein
							4	JC_C100004410	GO:0031976;GO:0009532//plastid stroma
							1	JC_C100004411	Amino acid transporter, transmembrane
							4	JC_C100004415	Ras small GTPase, Ras type IPR003578; Ras small GTPase, Rho type IPR003579; Ras small GTPase, Rab type IPR006688; ADP-ribosylation factor IPR013753; Ras
							0	JC_C100004417	GO:0043231//intracellular membrane-bounded organelle
							2	JC_C100004418	Peptidase S10, serine carboxypeptidase
							8	JC_C100004419	Transferase
							1	JC_C100004421	Transferase
							6	JC_C100004422	Peptidase C1A, papain C-terminal IPR013201; Proteinase inhibitor I29, cathepsin propeptide
							4	JC_C100004424	Pectate lyase/Amb allergen IPR011050; Pectin lyase fold/virulence factor
							4	JC_C100004434	-
							2	JC_C100004438	Ras small GTPase, Ras type IPR003579; Ras small GTPase, Rab type IPR006687; GTP-binding protein SAR1 IPR006688; ADP-ribosylation factor IPR006689; ARF/SAR superfamily
							2	JC_C100004439	Glutamine synthetase, catalytic region IPR008147; Glutamine synthetase, beta-Grasp
							1	JC_C100004440	Tetratricopeptide TPR-1 IPR013026; Tetratricopeptide region IPR019734; Tetratricopeptide repeat
							8	JC_C100004442	RNA-processing protein, HAT helix
							1	JC_C100004444	Pentatricopeptide repeat
							0	JC_C100004445	Glutathione-dependent formaldehyde-activating, GFA
							5	JC_C100004456	Cyclic nucleotide-binding IPR002110; Ankyrin repeat IPR005821; Ion transport IPR018490; Cyclic nucleotide-binding-like IPR020683; Ankyrin repeat-containing domain
							1	JC_C100004459	Zinc finger, C2H2-type
							1	JC_C100004461	Lipase, class 3 IPR005592; Mono-/di-acylglycerol lipase, N-terminal
							1	JC_C100004462	Glycoside hydrolase, family 17 IPR012946; X8 IPR017853; Glycoside hydrolase, catalytic core
							0	JC_C100004464	SANT, DNA-binding IPR009057; Homeodomain-like IPR014778; Myb, DNA-binding IPR017930; Myb-type HTH DNA-binding domain
							4	JC_C100004465	Protein kinase, catalytic domain IPR001611; Leucine-rich repeat IPR002290; Serine/threonine-protein kinase domain IPR011009; Protein kinase-like domain IPR013210; Leucine-rich repeat, N-terminal IPR014805; Transmembrane protein SKG6 IPR017442; Serine/threonine-protein kinase-like domain IPR020635; Tyrosine-protein kinase, subgroup, catalytic domain
							6	JC_C100004466	Heat shock protein Hsp20 IPR008978; HSP20-like chaperone
							8	JC_C100004467	Protein of unknown function DUF26
							4	JC_C100004468	NUDIX hydrolase domain IPR015797; NUDIX hydrolase domain-like
							0	JC_C100004469	-
							4	JC_C100004474	Nicastrin
							4	JC_C100004478	Protein kinase, catalytic domain IPR001611; Leucine-rich repeat IPR002290; Serine/threonine-protein kinase domain IPR003591; Leucine-rich repeat, typical subtype IPR011009; Protein kinase-like domain IPR013210; Leucine-rich repeat, N-terminal IPR017442; Serine/threonine-protein kinase-like domain IPR020635; Tyrosine-protein kinase, subgroup, catalytic domain
							0	JC_C100004479	Transcription elongation factor S-II, central region IPR012921; Spen paralogue and orthologue SPOC, C-terminal IPR017890; Transcription elongation factor S-IIM
							0	JC_C100004480	-
							7	JC_C100004481	Oxidoreductase, N-terminal IPR016040; NAD(P)-binding domain
							2	JC_C100004482	NMD3
							7	JC_C100004484	Zinc finger, RING-type IPR018957; Zinc finger, C3HC4 RING-type
							0	JC_C100004488	RNA recognition motif, RNP-1
							4	JC_C100004490	Protein of unknown function DUF597
							1	JC_C100004492	FAD-linked oxidase, C-terminal IPR006094; FAD linked oxidase, N-terminal IPR016164; FAD-linked oxidase-like, C-terminal IPR016166; FAD-binding, type 2
							4	JC_C100004494	Ubiquitin-conjugating enzyme, E2 IPR016135; Ubiquitin-conjugating enzyme/RWD-like
							7	JC_C100004496	Alpha/beta hydrolase fold-1
							8	JC_C100004498	GO:0043229//intracellular organelle
							3	JC_C100004504	ATPase, AAA+ type, core IPR003959; ATPase, AAA-type, core
							4	JC_C100004506	Thioredoxin-like fold
							1	JC_C100004507	Mitochondrial substrate carrier IPR018108; Mitochondrial substrate/solute carrier
							4	JC_C100004509	Emopamil-binding
							8	JC_C100004511	Haem peroxidase, plant/fungal/bacterial IPR010255; Haem peroxidase
							1	JC_C100004514	-
							3	JC_C100004515	Dehydrin
							4	JC_C100004516	-
							7	JC_C100004519	Pentatricopeptide repeat IPR009027; Ribosomal protein L9/RNase H1, N-terminal IPR020069; Ribosomal protein L9, C-terminal IPR020070; Ribosomal protein L9, N-terminal
							2	JC_C100004520	Proteasome component region PCI
							4	JC_C100004523	Target SNARE coiled-coil region IPR006011; Syntaxin, N-terminal IPR010989; t-SNARE
							7	JC_C100004525	-
							1	JC_C100004527	Homeobox IPR002913; Lipid-binding START IPR009057; Homeodomain-like
							1	JC_C100004528	Transcription factor jumonji/aspartyl beta-hydroxylase IPR003349; Transcription factor jumonji, JmjN IPR004198; Zinc finger, C5HC2-type IPR013129; Transcription factor jumonji
							4	JC_C100004538	Heat shock factor (HSF)-type, DNA-binding
							8	JC_C100004540	Calcium-binding EF-hand IPR018248; EF-Hand domain IPR018249; EF-HAND 2
							0	JC_C100004543	PAP fibrillin
							1	JC_C100004556	Phenylalanine/histidine ammonia-lyase IPR008948; L-Aspartase-like
							2	JC_C100004557	Carbohydrate/purine kinase
							4	JC_C100004558	Transcription factor jumonji/aspartyl beta-hydroxylase IPR003349; Transcription factor jumonji, JmjN IPR007087; Zinc finger, C2H2-type IPR013129; Transcription factor jumonji IPR015880; Zinc finger, C2H2-like
							2	JC_C100004560	GCN5-related N-acetyltransferase IPR016181; Acyl-CoA N-acyltransferase
							1	JC_C100004561	Protein kinase, catalytic domain IPR002290; Serine/threonine-protein kinase domain IPR011009; Protein kinase-like domain IPR017442; Serine/threonine-protein kinase-like domain IPR020635; Tyrosine-protein kinase, subgroup, catalytic domain
							4	JC_C100004562	ATPase, anion-transporting
							8	JC_C100004565	-
							4	JC_C100004567	Major intrinsic protein
							1	JC_C100004573	Zinc finger, GATA-type
							4	JC_C100004575	Ribophorin I
							1	JC_C100004576	Zinc finger, RING-type IPR002035; von Willebrand factor, type A IPR018957; Zinc finger, C3HC4 RING-type
							0	JC_C100004577	C2 calcium-dependent membrane targeting IPR008973; C2 calcium/lipid-binding region, CaLB IPR018029; C2 membrane targeting protein
							8	JC_C100004579	Domain of unknown function DUF2431
							1	JC_C100004580	Domain of unknown function DUF2431
							7	JC_C100004582	BURP
							7	JC_C100004584	-
							1	JC_C100004586	Glycoside hydrolase, family 18, catalytic domain IPR017853; Glycoside hydrolase, catalytic core
							6	JC_C100004588	ABC transporter-like IPR003593; ATPase, AAA+ type, core IPR013525; ABC-2 type transporter
							8	JC_C100004589	-
							1	JC_C100004590	-
							0	JC_C100004591	Haloacid dehalogenase-like hydrolase IPR008250; ATPase, P-type, ATPase-associated region IPR013200; HAD superfamily hydrolase-like, type 3
							0	JC_C100004593	-
							1	JC_C100004595	Protein kinase, catalytic domain IPR001245; Tyrosine-protein kinase, catalytic domain IPR001611; Leucine-rich repeat IPR002290; Serine/threonine-protein kinase domain IPR011009; Protein kinase-like domain IPR013101; Leucine-rich repeat 2 IPR020635; Tyrosine-protein kinase, subgroup, catalytic domain
							0	JC_C100004598	Short-chain dehydrogenase/reductase SDR IPR016040; NAD(P)-binding domain
							1	JC_C100004599	Single-stranded nucleic acid binding R3H
							3	JC_C100004600	GO:0009536//plastid
							2	JC_C100004602	Bile acid:sodium symporter
							1	JC_C100004603	Alpha/beta hydrolase fold-1
							1	JC_C100004605	Protein of unknown function DUF231, plant
							4	JC_C100004609	Peptidase M18, aminopeptidase I
							4	JC_C100004611	GHMP kinase IPR013750; GHMP kinase, C-terminal IPR020568; Ribosomal protein S5 domain 2-type fold
							4	JC_C100004614	GO:0043231//intracellular membrane-bounded organelle
							7	JC_C100004617	Cupin 1 IPR011051; Cupin, RmlC-type
							4	JC_C100004618	Glycoside hydrolase, family 63 IPR008928; Six-hairpin glycosidase-like
							2	JC_C100004620	AMMECR1
							6	JC_C100004622	Haemerythrin/HHE cation-binding motif
							0	JC_C100004625	Replication factor A protein 3 IPR016027; Nucleic acid-binding, OB-fold-like
							0	JC_C100004626	FeS cluster biogenesis
							6	JC_C100004629	GO:0043231//intracellular membrane-bounded organelle
							1	JC_C100004630	-
							0	JC_C100004631	Chloroplast protein import component , Ti20-like
							4	JC_C100004634	Dual specificity phosphatase, catalytic domain IPR000387; Dual-specific/protein-tyrosine phosphatase, conserved region IPR020422; Dual specificity phosphatase, subgroup, catalytic domain
							2	JC_C100004639	Peptidoglycan-binding Lysin subgroup IPR018392; Peptidoglycan-binding lysin domain
							8	JC_C100004644	Phosphoglycerate mutase
							4	JC_C100004646	Calcium-binding EF-hand IPR018248; EF-Hand domain IPR018249; EF-HAND 2
							1	JC_C100004648	Armadillo IPR003613; U box domain IPR016024; Armadillo-type fold
							8	JC_C100004652	Glycosyl transferase, family 8
							0	JC_C100004653	Pentatricopeptide repeat
							2	JC_C100004655	Flavin-containing monooxygenase FMO
							7	JC_C100004664	Retinoblastoma-associated protein, B-box IPR002720; Retinoblastoma-associated protein, A-box IPR011028; Cyclin-like
							8	JC_C100004666	Pentatricopeptide repeat
							2	JC_C100004669	Sterol-sensing 5TM box IPR003392; Patched
							1	JC_C100004670	Protein kinase, catalytic domain IPR002290; Serine/threonine-protein kinase domain IPR011009; Protein kinase-like domain IPR017442; Serine/threonine-protein kinase-like domain IPR020635; Tyrosine-protein kinase, subgroup, catalytic domain
							4	JC_C100004674	WD40 repeat IPR011046; WD40 repeat-like-containing domain IPR017986; WD40-repeat-containing domain IPR019781; WD40 repeat, subgroup IPR019782; WD40 repeat 2
							8	JC_C100004676	Protein of unknown function DUF92, transmembrane
							7	JC_C100004677	Protein of unknown function DUF231, plant
							8	JC_C100004678	Protein of unknown function DUF231, plant
							0	JC_C100004680	-
							8	JC_C100004681	Ribosomal protein L30p/L7e, conserved region IPR016082; Ribosomal protein L30, ferredoxin-like fold domain
							6	JC_C100004682	Phosphoribosyltransferase
							1	JC_C100004686	Protein of unknown function DUF1475
							8	JC_C100004690	Multicopper oxidase, type 1 IPR008972; Cupredoxin IPR011707; Multicopper oxidase, type 3
							0	JC_C100004693	Biotin/lipoate A/B protein ligase
							7	JC_C100004696	-
							8	JC_C100004697	-
							4	JC_C100004702	Pathogenesis-related transcriptional factor/ERF, DNA-binding IPR016177; DNA-binding, integrase-type
							4	JC_C100004703	Yippee-like protein
							4	JC_C100004705	GO:0043231//intracellular membrane-bounded organelle
							1	JC_C100004709	-
							1	JC_C100004712	Plastocyanin-like IPR008972; Cupredoxin
							1	JC_C100004713	Class II aldolase/adducin, N-terminal
							4	JC_C100004714	-
							4	JC_C100004715	ATPase, AAA+ type, core IPR003959; ATPase, AAA-type, core
							0	JC_C100004716	Exonuclease IPR013520; Exonuclease, RNase T/DNA polymerase III
							1	JC_C100004717	Zinc finger, MIZ-type
							3	JC_C100004718	-
							6	JC_C100004720	Aminotransferase, class I/II IPR015424; Pyridoxal phosphate-dependent transferase, major region
							4	JC_C100004721	GO:0043231//intracellular membrane-bounded organelle
							7	JC_C100004730	Transcription factor, SBP-box
							1	JC_C100004731	Protein kinase, catalytic domain IPR001611; Leucine-rich repeat IPR002290; Serine/threonine-protein kinase domain IPR003591; Leucine-rich repeat, typical subtype IPR011009; Protein kinase-like domain IPR013210; Leucine-rich repeat, N-terminal IPR017442; Serine/threonine-protein kinase-like domain IPR020635; Tyrosine-protein kinase, subgroup, catalytic domain
							3	JC_C100004734	Multi antimicrobial extrusion protein MatE
							5	JC_C100004736	Multi antimicrobial extrusion protein MatE
							1	JC_C100004739	Peptidase C12, ubiquitin carboxyl-terminal hydrolase 1
							8	JC_C100004740	Forkhead-associated IPR008984; SMAD/FHA domain
							8	JC_C100004746	Multi antimicrobial extrusion protein MatE
							5	JC_C100004750	GroES-like IPR013149; Alcohol dehydrogenase, zinc-binding IPR016040; NAD(P)-binding domain
							4	JC_C100004752	GroES-like IPR013149; Alcohol dehydrogenase, zinc-binding IPR016040; NAD(P)-binding domain IPR020843; Polyketide synthase, enoylreductase
							2	JC_C100004753	GroES-like IPR013149; Alcohol dehydrogenase, zinc-binding IPR016040; NAD(P)-binding domain
							3	JC_C100004758	Protein kinase, catalytic domain IPR002110; Ankyrin repeat IPR002290; Serine/threonine-protein kinase domain IPR011009; Protein kinase-like domain IPR017442; Serine/threonine-protein kinase-like domain IPR020635; Tyrosine-protein kinase, subgroup, catalytic domain IPR020683; Ankyrin repeat-containing domain
							4	JC_C100004761	LETM1-like IPR018249; EF-HAND 2
							1	JC_C100004762	UDP-glucuronosyl/UDP-glucosyltransferase
							2	JC_C100004763	Zinc finger, TAZ-type IPR000210; BTB/POZ-like IPR011333; BTB/POZ fold IPR013069; BTB/POZ
							4	JC_C100004768	GO:0043231//intracellular membrane-bounded organelle
							0	JC_C100004769	-
							4	JC_C100004770	GO:0043231//intracellular membrane-bounded organelle
							6	JC_C100004772	Rhodanese-like
							4	JC_C100004774	-
							4	JC_C100004776	Pyridoxal phosphate-dependent enzyme, beta subunit
							7	JC_C100004777	Short-chain dehydrogenase/reductase SDR IPR016040; NAD(P)-binding domain
							2	JC_C100004778	Aminoacyl-tRNA synthetase, class Ib
							1	JC_C100004781	Nucleotidyltransferase IPR007010; Poly(A) polymerase, RNA-binding region IPR007012; Poly(A) polymerase, central region IPR011068; Nucleotidyltransferase, class I, C-terminal-like
							6	JC_C100004784	Protein of unknown function DUF599
							5	JC_C100004786	Bet v I allergen
							4	JC_C100004789	Glycosyl transferase, family 28 IPR007235; Glycosyl transferase, family 28, C-terminal
							8	JC_C100004790	-
							0	JC_C100004796	GO:0043231//intracellular membrane-bounded organelle;GO:0044444//cytoplasmic part
							4	JC_C100004797	Ribosomal protein S24/S35, mitochondrial
							2	JC_C100004802	GroES-like IPR013149; Alcohol dehydrogenase, zinc-binding IPR016040; NAD(P)-binding domain IPR020843; Polyketide synthase, enoylreductase
							7	JC_C100004806	UDP-glucuronosyl/UDP-glucosyltransferase
							7	JC_C100004807	UDP-glucuronosyl/UDP-glucosyltransferase
							3	JC_C100004808	-
							2	JC_C100004810	Actin-binding FH2/DRF autoregulatory IPR015425; Actin-binding FH2
							1	JC_C100004813	Haloacid dehalogenase-like hydrolase
							2	JC_C100004817	Ribosomal protein S16
							0	JC_C100004818	Protein of unknown function DUF842, eukaryotic
							0	JC_C100004819	Crotonase, core
							5	JC_C100004820	Bet v I allergen
							0	JC_C100004822	Bet v I allergen
							4	JC_C100004826	Zinc finger, RING-type IPR018957; Zinc finger, C3HC4 RING-type
							7	JC_C100004829	Reticulon
							1	JC_C100004830	Kinesin, motor region IPR007520; Bul1, C-terminal
							1	JC_C100004835	Protein kinase, catalytic domain IPR002290; Serine/threonine-protein kinase domain IPR002314; Aminoacyl-tRNA synthetase, class II (G/ H/ P/ S), conserved region IPR004154; Anticodon-binding IPR006575; RWD IPR011009; Protein kinase-like domain IPR017442; Serine/threonine-protein kinase-like domain IPR020635; Tyrosine-protein kinase, subgroup, catalytic domain
							1	JC_C100004841	Mitochodrial transcription termination factor-related
							8	JC_C100004844	Mitochodrial transcription termination factor-related
							4	JC_C100004845	Mitochodrial transcription termination factor-related
							2	JC_C100004847	Mitochodrial transcription termination factor-related
							8	JC_C100004848	Calcium-binding EF-hand IPR018248; EF-Hand domain IPR018249; EF-HAND 2
							2	JC_C100004853	Carbohydrate/purine kinase
							2	JC_C100004854	Hrf1
							4	JC_C100004856	Plastocyanin-like IPR008972; Cupredoxin
							4	JC_C100004861	Electron transfer flavoprotein-ubiquinone oxidoreductase IPR013027; FAD-dependent pyridine nucleotide-disulphide oxidoreductase
							5	JC_C100004862	Haem peroxidase, plant/fungal/bacterial IPR010255; Haem peroxidase
							7	JC_C100004865	GO:0044439
							4	JC_C100004869	Alkaline-phosphatase-like, core domain
							2	JC_C100004871	RNA polymerase, Rpb8 IPR016027; Nucleic acid-binding, OB-fold-like
							4	JC_C100004872	Pentatricopeptide repeat
							7	JC_C100004878	Protein kinase, catalytic domain IPR001368; TNFR/CD27/30/40/95 cysteine-rich region IPR002290; Serine/threonine-protein kinase domain IPR009091; Regulator of chromosome condensation/beta-lactamase-inhibitor protein II IPR011009; Protein kinase-like domain IPR017442; Serine/threonine-protein kinase-like domain IPR020635; Tyrosine-protein kinase, subgroup, catalytic domain
							7	JC_C100004880	-
							1	JC_C100004881	Transcription factor, FAR1-related
							8	JC_C100004884	Protein of unknown function DUF239, plant
							2	JC_C100004894	Peptidase M22, glycoprotease
							4	JC_C100004895	-
							7	JC_C100004903	NB-ARC
							7	JC_C100004904	-
							0	JC_C100004906	NB-ARC
							1	JC_C100004907	NB-ARC
							7	JC_C100004911	Protein of unknown function DUF594
							1	JC_C100004916	RNA recognition motif, RNP-1 IPR012921; Spen paralogue and orthologue SPOC, C-terminal
							2	JC_C100004923	Ribosomal protein L38e
							8	JC_C100004926	-
							4	JC_C100004935	SANT, DNA-binding IPR014778; Myb, DNA-binding
							4	JC_C100004937	RabGAP/TBC
							1	JC_C100004940	Zinc finger, Sec23/Sec24-type IPR006896; Sec23/Sec24 trunk region IPR006900; Sec23/Sec24 helical region IPR007123; Gelsolin region IPR012990; Sec23/Sec24 beta-sandwich
							1	JC_C100004943	-
							4	JC_C100004944	-
							4	JC_C100004946	Pentatricopeptide repeat
							0	JC_C100004951	Mitochodrial transcription termination factor-related
							4	JC_C100004961	Nuclear fragile X mental retardation-interacting protein 1, conserved region
							5	JC_C100004962	Pathogenesis-related transcriptional factor/ERF, DNA-binding IPR016177; DNA-binding, integrase-type
							4	JC_C100004963	-
							8	JC_C100004966	EAP30
							1	JC_C100004971	Toll-Interleukin receptor IPR002182; NB-ARC IPR011713; Leucine-rich repeat 3
							1	JC_C100004972	-
							2	JC_C100004973	SecY protein IPR019561; Translocon Sec61/SecY, plug domain
							4	JC_C100004974	NHL repeat
							6	JC_C100004976	-
							2	JC_C100004981	Protein of unknown function DUF641, plant
							0	JC_C100004987	Pathogenesis-related transcriptional factor/ERF, DNA-binding IPR016177; DNA-binding, integrase-type
							8	JC_C100004989	DNA polymerase subunit Cdc27
							4	JC_C100004990	Peptidase C26 IPR015527; Peptidase C26, gamma-glutamyl hydrolase
							1	JC_C100004993	-
							4	JC_C100004994	Oxoglutarate/iron-dependent oxygenase IPR006620; Prolyl 4-hydroxylase, alpha subunit
							4	JC_C100004995	Zinc finger, RING-type IPR018957; Zinc finger, C3HC4 RING-type
							4	JC_C100004999	WD40 repeat IPR011046; WD40 repeat-like-containing domain IPR012952; BING4, C-terminal IPR017986; WD40-repeat-containing domain IPR019781; WD40 repeat, subgroup IPR019782; WD40 repeat 2
							4	JC_C100005000	Protein of unknown function DUF221
							1	JC_C100005001	Peptidase A1 IPR009007; Peptidase aspartic, catalytic
							1	JC_C100005002	Peptidase A1 IPR009007; Peptidase aspartic, catalytic
							2	JC_C100005006	RNA-binding protein Lupus La
							0	JC_C100005007	Pentatricopeptide repeat
							4	JC_C100005009	Cyclin-like F-box
							2	JC_C100005010	Vacuolar protein sorting-associated protein 35
							1	JC_C100005013	Heat shock protein DnaJ, N-terminal
							4	JC_C100005015	Checkpoint protein Rad24
							1	JC_C100005018	-
							4	JC_C100005025	Protein of unknown function DUF632
							4	JC_C100005026	Protein phosphatase 2C-related IPR014045; Protein phosphatase 2C, N-terminal
							1	JC_C100005027	Methyltransferase-16, putative
							7	JC_C100005029	Major intrinsic protein
							7	JC_C100005031	Leucine-rich repeat IPR002182; NB-ARC
							2	JC_C100005045	Protein of unknown function Cys-rich
							3	JC_C100005046	-
							3	JC_C100005049	Heavy metal transport/detoxification protein
							4	JC_C100005050	GO:0043231//intracellular membrane-bounded organelle
							2	JC_C100005051	Ran GTPase IPR003577; Ras small GTPase, Ras type IPR003578; Ras small GTPase, Rho type IPR003579; Ras small GTPase, Rab type IPR013753; Ras
							1	JC_C100005055	3-dehydroquinate synthase AroB
							6	JC_C100005057	SAM dependent carboxyl methyltransferase
							1	JC_C100005058	Protein of unknown function DUF632 IPR006868; Protein of unknown function DUF630
							8	JC_C100005059	Tetratricopeptide TPR-1 IPR013026; Tetratricopeptide region IPR019734; Tetratricopeptide repeat
							2	JC_C100005063	RNA-binding S4 IPR005824; KOW IPR013843; Ribosomal protein S4e, N-terminal IPR013845; Ribosomal protein S4e, central
							6	JC_C100005064	-
							1	JC_C100005068	Inositol polyphosphate related phosphatase IPR005135; Endonuclease/exonuclease/phosphatase
							1	JC_C100005070	Snf7
							3	JC_C100005073	-
							6	JC_C100005076	Ribonuclease E inhibitor RraA/Dimethylmenaquinone methyltransferase
							2	JC_C100005079	Peptidase M24, structural domain
							1	JC_C100005080	tRNA-binding region IPR016027; Nucleic acid-binding, OB-fold-like
							7	JC_C100005084	Mlo-related protein
							0	JC_C100005088	Poly(ADP-ribose) glycohydrolase
							4	JC_C100005089	GO:0043231//intracellular membrane-bounded organelle
							4	JC_C100005091	Inosine/uridine-preferring nucleoside hydrolase
							4	JC_C100005092	Inositol 1, 3, 4-trisphosphate 56-kinase
							4	JC_C100005093	Protein of unknown function DUF231, plant
							8	JC_C100005096	-
							1	JC_C100005100	DNA-binding WRKY
							1	JC_C100005103	Mov34/MPN/PAD-1
							8	JC_C100005104	Transcription factor, MADS-box
							7	JC_C100005106	GRAS transcription factor
							7	JC_C100005110	Basic helix-loop-helix dimerisation region bHLH IPR011598; Helix-loop-helix DNA-binding
							2	JC_C100005112	Methylenetetrahydrofolate reductase
							4	JC_C100005114	SET IPR003616; Post-SET zinc-binding region IPR006560; AWS
							4	JC_C100005121	RIO kinase IPR011009; Protein kinase-like domain IPR015285; RIO2 kinase, winged helix, N-terminal IPR018934; RIO-like kinase
							3	JC_C100005122	-
							6	JC_C100005124	RAP domain
							7	JC_C100005125	-
							1	JC_C100005127	-
							3	JC_C100005129	-
							7	JC_C100005132	Transcription factor IIIC, subunit 5
							7	JC_C100005137	Glycoside hydrolase, family 28 IPR006626; Parallel beta-helix repeat IPR011050; Pectin lyase fold/virulence factor
							4	JC_C100005141	SNARE associated Golgi protein
							8	JC_C100005144	Toll-Interleukin receptor IPR001611; Leucine-rich repeat IPR002182; NB-ARC IPR011713; Leucine-rich repeat 3
							7	JC_C100005146	-
							4	JC_C100005148	Protein kinase, catalytic domain IPR002048; Calcium-binding EF-hand IPR002290; Serine/threonine-protein kinase domain IPR011009; Protein kinase-like domain IPR017442; Serine/threonine-protein kinase-like domain IPR018248; EF-Hand domain IPR018249; EF-HAND 2 IPR020635; Tyrosine-protein kinase, subgroup, catalytic domain
							2	JC_C100005156	Amine oxidase
							8	JC_C100005158	Amine oxidase
							8	JC_C100005162	Tetratricopeptide TPR-1 IPR013026; Tetratricopeptide region IPR019734; Tetratricopeptide repeat
							4	JC_C100005168	Basic helix-loop-helix dimerisation region bHLH IPR011598; Helix-loop-helix DNA-binding
							2	JC_C100005170	Triosephosphate isomerase
							4	JC_C100005173	Plant neutral invertase IPR008928; Six-hairpin glycosidase-like
							4	JC_C100005176	ER lumen protein retaining receptor
							1	JC_C100005179	Pentatricopeptide repeat
							7	JC_C100005180	Auxin responsive SAUR protein
							8	JC_C100005187	Auxin responsive SAUR protein
							8	JC_C100005188	Ribosome-binding factor A
							1	JC_C100005189	Glutamine amidotransferase, class-II IPR000836; Phosphoribosyltransferase IPR017932; Glutamine amidotransferase, type II
							2	JC_C100005190	ATPase, F0/V0 complex, subunit C
							2	JC_C100005191	Orn/DAP/Arg decarboxylase 2
							8	JC_C100005195	Zinc finger, B-box
							8	JC_C100005204	Plant disease resistance response protein
							8	JC_C100005205	Amidase
							4	JC_C100005206	Amidase
							0	JC_C100005207	-
							2	JC_C100005211	Peptidyl-prolyl cis-trans isomerase, cyclophilin-type IPR015891; Cyclophilin-like
							0	JC_C100005214	Protein of unknown function DUF1210
							4	JC_C100005218	-
							1	JC_C100005219	Nucleolar 27S pre-rRNA processing, Urb2/Npa2
							1	JC_C100005225	Nucleoside phosphorylase
							6	JC_C100005227	EF-HAND 2
							4	JC_C100005228	RNA 3'-terminal phosphate cyclase-like IPR013792; RNA 3'-terminal phosphate cyclase/enolpyruvate transferase, alpha/beta IPR013796; RNA 3'-terminal phosphate cyclase, insert region
							3	JC_C100005230	-
							7	JC_C100005235	Auxin responsive SAUR protein
							2	JC_C100005236	GO:0005753//mitochondrial proton-transporting ATP synthase complex
							4	JC_C100005237	Zinc finger, CCCH-type IPR001269; tRNA-dihydrouridine synthase
							4	JC_C100005238	Basic-leucine zipper (bZIP) transcription factor IPR011700; Basic leucine zipper
							6	JC_C100005247	Fructose-bisphosphate aldolase, class-I
							2	JC_C100005249	Glycoside hydrolase, family 9 IPR008928; Six-hairpin glycosidase-like
							4	JC_C100005251	Zinc finger, CCHC-type
							1	JC_C100005253	Cyclin-like F-box IPR006652; Kelch repeat type 1 IPR011043; Galactose oxidase/kelch, beta-propeller
							0	JC_C100005258	ATP-NAD/AcoX kinase IPR016064; ATP-NAD kinase, PpnK-type
							8	JC_C100005262	Cyclin-like F-box
							3	JC_C100005263	-
							8	JC_C100005266	-
							7	JC_C100005269	Integrase, catalytic core IPR012337; Polynucleotidyl transferase, ribonuclease H fold
							0	JC_C100005270	Cyclin-like F-box
							2	JC_C100005273	RNA recognition motif, RNP-1
							5	JC_C100005276	Protein of unknown function DUF81
							4	JC_C100005277	Cyclin-like F-box
							0	JC_C100005280	Maf-like protein
							1	JC_C100005281	SNF2-related IPR001650; DNA/RNA helicase, C-terminal IPR014001; DEAD-like helicase, N-terminal IPR014021; Helicase, superfamily 1/2, ATP-binding domain
							7	JC_C100005283	ATPase, AAA+ type, core IPR003959; ATPase, AAA-type, core
							1	JC_C100005284	Bromodomain
							1	JC_C100005286	Oligopeptide transporter IPR016196; Major facilitator superfamily, general substrate transporter
							8	JC_C100005290	Ricin B lectin IPR001611; Leucine-rich repeat
							8	JC_C100005295	Methyltransferase small
							0	JC_C100005303	PRP38
							1	JC_C100005307	tRNA isopentenyltransferase
							7	JC_C100005313	-
							1	JC_C100005315	-
							1	JC_C100005318	Protein kinase, catalytic domain IPR002290; Serine/threonine-protein kinase domain IPR011009; Protein kinase-like domain IPR017442; Serine/threonine-protein kinase-like domain IPR020635; Tyrosine-protein kinase, subgroup, catalytic domain
							4	JC_C100005322	Tetratricopeptide TPR-1 IPR012336; Thioredoxin-like fold IPR013026; Tetratricopeptide region IPR013105; Tetratricopeptide TPR2 IPR013766; Thioredoxin domain IPR019734; Tetratricopeptide repeat
							2	JC_C100005325	14-3-3 protein
							4	JC_C100005328	Alg9-like mannosyltransferase
							2	JC_C100005329	Phosphoenolpyruvate carboxylase IPR015813; Pyruvate/Phosphoenolpyruvate kinase, catalytic core
							3	JC_C100005330	-
							2	JC_C100005332	Heat shock protein Hsp20 IPR008978; HSP20-like chaperone
							0	JC_C100005335	Cyclin-like F-box
							7	JC_C100005338	UspA
							7	JC_C100005341	-
							6	JC_C100005342	-
							1	JC_C100005343	-
							8	JC_C100005344	Glycosyl transferase, group 1
							4	JC_C100005346	Transcription factor, FAR1-related
							4	JC_C100005347	Metallophosphoesterase IPR006186; Serine/threonine-specific protein phosphatase/bis(5-nucleosyl)-tetraphosphatase
							1	JC_C100005350	Thymidine kinase
							4	JC_C100005352	Fatty acid hydroxylase
							7	JC_C100005354	Zinc finger, C2H2-type
							4	JC_C100005357	General substrate transporter IPR016196; Major facilitator superfamily, general substrate transporter
							4	JC_C100005359	Bacterial surface antigen (D15) IPR010827; Surface antigen variable number
							0	JC_C100005360	Pentatricopeptide repeat
							2	JC_C100005362	Zinc finger, RING-type IPR010543; Protein of unknown function DUF1117 IPR018957; Zinc finger, C3HC4 RING-type
							2	JC_C100005363	Zinc finger, RING-type IPR018957; Zinc finger, C3HC4 RING-type
							3	JC_C100005365	Zinc/iron permease
							3	JC_C100005369	-
							4	JC_C100005370	Biotin/lipoyl attachment IPR001078; 2-oxoacid dehydrogenase acyltransferase, catalytic domain IPR004167; E3 binding IPR011053; Single hybrid motif
							8	JC_C100005372	Haloacid dehalogenase-like hydrolase
							4	JC_C100005373	Haloacid dehalogenase-like hydrolase
							6	JC_C100005376	Heat shock protein Hsp20 IPR008978; HSP20-like chaperone
							7	JC_C100005380	-
							4	JC_C100005381	Glutathione S-transferase, N-terminal IPR004046; Glutathione S-transferase, C-terminal IPR010987; Glutathione S-transferase, C-terminal-like IPR012336; Thioredoxin-like fold IPR017933; Glutathione S-transferase/chloride channel, C-terminal
							8	JC_C100005391	SKP1 component IPR011333; BTB/POZ fold IPR016073; SKP1 component, POZ
							8	JC_C100005392	Cation efflux protein
							4	JC_C100005394	Protein phosphatase 2C-related IPR014045; Protein phosphatase 2C, N-terminal
							1	JC_C100005395	Short-chain dehydrogenase/reductase SDR IPR016040; NAD(P)-binding domain
							4	JC_C100005401	Splicing factor PWI
							8	JC_C100005409	Homeodomain-like IPR014778; Myb, DNA-binding
							4	JC_C100005410	-
							8	JC_C100005415	DVL
							0	JC_C100005416	-
							3	JC_C100005417	-
							7	JC_C100005422	GRAS transcription factor
							4	JC_C100005423	GRAS transcription factor
							0	JC_C100005427	GRAS transcription factor
							2	JC_C100005432	SANT, DNA-binding IPR009057; Homeodomain-like IPR014778; Myb, DNA-binding IPR017930; Myb-type HTH DNA-binding domain
							1	JC_C100005438	Heat shock protein DnaJ, N-terminal
							5	JC_C100005447	Protein of unknown function DUF6, transmembrane
							0	JC_C100005448	-
							1	JC_C100005455	Transcriptional factor B3
							7	JC_C100005456	Ankyrin repeat IPR020683; Ankyrin repeat-containing domain
							4	JC_C100005458	-
							0	JC_C100005459	Zinc finger, C2H2-type IPR015880; Zinc finger, C2H2-like
							8	JC_C100005462	GO:0043231//intracellular membrane-bounded organelle
							1	JC_C100005464	RNA recognition motif, RNP-1 IPR001878; Zinc finger, CCHC-type
							7	JC_C100005465	Major intrinsic protein
							4	JC_C100005470	Armadillo-type fold
							2	JC_C100005475	NAD-dependent epimerase/dehydratase IPR016040; NAD(P)-binding domain
							4	JC_C100005476	BTB/POZ-like IPR004249; NPH3 IPR011333; BTB/POZ fold
							4	JC_C100005477	GO:0009528//plastid inner membrane
							4	JC_C100005481	Mammalian cell entry related
							7	JC_C100005484	Protein of unknown function DUF296 IPR017956; AT hook, DNA-binding motif
							4	JC_C100005485	Glycosyl transferase, family 2
							8	JC_C100005488	Toll-Interleukin receptor IPR001611; Leucine-rich repeat IPR002182; NB-ARC IPR011713; Leucine-rich repeat 3
							4	JC_C100005490	Phosphoglycerate mutase
							7	JC_C100005492	Protein of unknown function DUF868, plant
							7	JC_C100005494	Transferase
							8	JC_C100005499	Nucleic acid binding, OB-fold, tRNA/helicase-type
							7	JC_C100005500	Lipase, GDSL
							4	JC_C100005508	-
							1	JC_C100005512	Phytosulfokine
							4	JC_C100005513	Prephenate dehydratase
							4	JC_C100005514	Xanthine/uracil/vitamin C permease
							4	JC_C100005517	Dimeric alpha-beta barrel IPR013097; Stress responsive alpha-beta barrel
							4	JC_C100005520	Cystathionine beta-synthase, core IPR002550; Protein of unknown function DUF21
							8	JC_C100005523	-
							2	JC_C100005524	Lactate/malate dehydrogenase IPR015955; Lactate dehydrogenase/glycoside hydrolase, family 4, C-terminal IPR016040; NAD(P)-binding domain
							4	JC_C100005526	Inorganic pyrophosphatase
							0	JC_C100005527	-
							8	JC_C100005529	-
							1	JC_C100005532	Quinate/shikimate 5-dehydrogenase/glutamyl-tRNA reductase IPR015895; Tetrapyrrole biosynthesis, glutamyl-tRNA reductase, N-terminal IPR015896; Tetrapyrrole biosynthesis, glutamyl-tRNA reductase, C-terminal IPR016040; NAD(P)-binding domain
							6	JC_C100005533	Zinc finger, RING-type IPR006595; CTLH, C-terminal to LisH motif IPR013144; Ran binding protein-like, CRA domain
							0	JC_C100005534	Protein of unknown function DUF794, plant
							2	JC_C100005539	Octicosapeptide/Phox/Bem1p
							2	JC_C100005543	Bromodomain
							8	JC_C100005544	Oligopeptide transporter OPT superfamily
							7	JC_C100005557	Allergen V5/Tpx-1 related IPR004253; Protein of unknown function DUF231, plant IPR014044; SCP-like extracellular
							4	JC_C100005567	Transposase, MuDR, plant IPR006564; Zinc finger, PMZ-type IPR007527; Zinc finger, SWIM-type IPR018289; MULE transposase, conserved domain
							0	JC_C100005569	Cation transporter
							4	JC_C100005573	Alpha/beta hydrolase fold-1
							0	JC_C100005574	Protein kinase, catalytic domain IPR001611; Leucine-rich repeat IPR002290; Serine/threonine-protein kinase domain IPR003591; Leucine-rich repeat, typical subtype IPR011009; Protein kinase-like domain IPR013210; Leucine-rich repeat, N-terminal IPR017442; Serine/threonine-protein kinase-like domain IPR020635; Tyrosine-protein kinase, subgroup, catalytic domain
							7	JC_C100005576	Basic helix-loop-helix dimerisation region bHLH IPR011598; Helix-loop-helix DNA-binding
							1	JC_C100005578	-
							4	JC_C100005579	Major facilitator superfamily MFS-1 IPR016196; Major facilitator superfamily, general substrate transporter
							0	JC_C100005581	Leucine-rich repeat IPR002182; NB-ARC
							1	JC_C100005583	Regulator of K+ conductance, N-terminal IPR006153; Cation/H+ exchanger IPR016040; NAD(P)-binding domain
							4	JC_C100005584	Biotin/lipoate A/B protein ligase
							4	JC_C100005588	Methionine sulphoxide reductase B IPR011057; Mss4-like
							1	JC_C100005590	Protein of unknown function DUF231, plant
							1	JC_C100005600	GO:0030529//ribonucleoprotein complex
							4	JC_C100005604	GO:0043231//intracellular membrane-bounded organelle
							4	JC_C100005607	NLI interacting factor
							4	JC_C100005608	Zinc finger, U1-type IPR004345; TB2/DP1/HVA22 related protein IPR015880; Zinc finger, C2H2-like
							8	JC_C100005614	-
							1	JC_C100005615	-
							4	JC_C100005616	Basic helix-loop-helix dimerisation region bHLH IPR011598; Helix-loop-helix DNA-binding
							8	JC_C100005617	Abortive infection protein
							7	JC_C100005618	-
							8	JC_C100005619	Peptidase C19, ubiquitin carboxyl-terminal hydrolase 2
							2	JC_C100005621	Arf GTPase activating protein
							0	JC_C100005622	-
							6	JC_C100005623	Polyketide cyclase/dehydrase
							4	JC_C100005625	Mitochondrial substrate carrier IPR018108; Mitochondrial substrate/solute carrier
							7	JC_C100005628	C2 calcium/lipid-binding region, CaLB IPR014020; Tensin phosphatase, C2 domain IPR015425; Actin-binding FH2
							6	JC_C100005630	GO:0043231//intracellular membrane-bounded organelle
							4	JC_C100005631	DNA/RNA helicase, C-terminal IPR011545; DNA/RNA helicase, DEAD/DEAH box type, N-terminal IPR014001; DEAD-like helicase, N-terminal IPR014014; RNA helicase, DEAD-box type, Q motif IPR014021; Helicase, superfamily 1/2, ATP-binding domain
							4	JC_C100005632	RNA polymerase II subunit A
							8	JC_C100005635	-
							1	JC_C100005637	DNA/RNA helicase, C-terminal IPR002121; Helicase/RNase D C-terminal, HRDC domain IPR011545; DNA/RNA helicase, DEAD/DEAH box type, N-terminal IPR014001; DEAD-like helicase, N-terminal IPR014021; Helicase, superfamily 1/2, ATP-binding domain IPR018982; RQC domain
							4	JC_C100005644	WWE domain IPR012317; Poly(ADP-ribose) polymerase, catalytic region
							4	JC_C100005652	Sodium/solute symporter
							8	JC_C100005653	Disease resistance/zinc finger/chromosome condensation-like region
							2	JC_C100005663	Protein of unknown function DUF248, methyltransferase putative
							1	JC_C100005666	-
							8	JC_C100005667	Leucine-rich repeat IPR002182; NB-ARC IPR003591; Leucine-rich repeat, typical subtype
							2	JC_C100005670	Defender against death DAD protein
							1	JC_C100005677	-
							1	JC_C100005678	Homeodomain-like IPR014778; Myb, DNA-binding
							1	JC_C100005687	K+ potassium transporter
							4	JC_C100005689	SNF2-related IPR000953; Chromo domain IPR001650; DNA/RNA helicase, C-terminal IPR001965; Zinc finger, PHD-type IPR011011; Zinc finger, FYVE/PHD-type IPR014001; DEAD-like helicase, N-terminal IPR014021; Helicase, superfamily 1/2, ATP-binding domain IPR016197; Chromo domain-like IPR019787; Zinc finger, PHD-finger
							5	JC_C100005692	-
							4	JC_C100005698	Homeodomain-like IPR014778; Myb, DNA-binding IPR017930; Myb-type HTH DNA-binding domain
							4	JC_C100005700	Protein of unknown function DUF547
							6	JC_C100005712	Lipid-binding START
							6	JC_C100005721	Protein kinase, catalytic domain IPR002290; Serine/threonine-protein kinase domain IPR006016; UspA IPR011009; Protein kinase-like domain IPR017442; Serine/threonine-protein kinase-like domain IPR020635; Tyrosine-protein kinase, subgroup, catalytic domain
							4	JC_C100005726	Inorganic H+ pyrophosphatase
							8	JC_C100005735	Zinc finger, RING-CH-type IPR018957; Zinc finger, C3HC4 RING-type
							1	JC_C100005737	-
							4	JC_C100005739	-
							1	JC_C100005740	-
							8	JC_C100005741	Terpene synthase-like IPR005630; Terpene synthase, metal-binding domain IPR008930; Terpenoid cylases/protein prenyltransferase alpha-alpha toroid IPR008949; Terpenoid synthase
							7	JC_C100005742	Cytochrome P450
							0	JC_C100005744	Peptidase M41 IPR003593; ATPase, AAA+ type, core IPR003959; ATPase, AAA-type, core
							4	JC_C100005745	DNA/RNA helicase, C-terminal IPR011545; DNA/RNA helicase, DEAD/DEAH box type, N-terminal IPR014001; DEAD-like helicase, N-terminal IPR014014; RNA helicase, DEAD-box type, Q motif IPR014021; Helicase, superfamily 1/2, ATP-binding domain
							4	JC_C100005746	SKP1 component IPR011333; BTB/POZ fold IPR016072; SKP1 component, dimerisation IPR016073; SKP1 component, POZ
							3	JC_C100005749	-
							0	JC_C100005752	-
							4	JC_C100005753	CCAAT-binding factor IPR011501; Nucleolar complex-associated IPR016024; Armadillo-type fold
							4	JC_C100005769	Protein kinase, catalytic domain IPR001611; Leucine-rich repeat IPR002290; Serine/threonine-protein kinase domain IPR011009; Protein kinase-like domain IPR017442; Serine/threonine-protein kinase-like domain IPR020635; Tyrosine-protein kinase, subgroup, catalytic domain
							8	JC_C100005774	Pectinesterase inhibitor
							1	JC_C100005775	Aminotransferase class-III IPR015424; Pyridoxal phosphate-dependent transferase, major region
							8	JC_C100005780	-
							4	JC_C100005784	Aminotransferase, class V/Cysteine desulfurase IPR005302; Molybdenum cofactor sulfurase, C-terminal IPR005303; MOSC, N-terminal beta barrel IPR015424; Pyridoxal phosphate-dependent transferase, major region
							1	JC_C100005787	FAD linked oxidase, N-terminal IPR015345; Cytokinin dehydrogenase 1, FAD/cytokinin binding domain IPR016164; FAD-linked oxidase-like, C-terminal IPR016166; FAD-binding, type 2
							1	JC_C100005790	Translation elongation factor EFG/EF2, C-terminal IPR000795; Protein synthesis factor, GTP-binding IPR004161; Translation elongation factor EFTu/EF1A, domain 2 IPR005517; Translation elongation factor EFG/EF2, domain IV IPR009000; Translation elongation/initiation factor/Ribosomal, beta-barrel IPR009022; Elongation factor G/III/V IPR020568; Ribosomal protein S5 domain 2-type fold
							0	JC_C100005791	Peptidase C12, ubiquitin carboxyl-terminal hydrolase 1
							6	JC_C100005792	Iojap-related protein
							4	JC_C100005794	ATPase, AAA+ type, core IPR003959; ATPase, AAA-type, core IPR020231; Uncharacterised protein family, YfgI
							4	JC_C100005796	-
							0	JC_C100005799	Pentatricopeptide repeat
							8	JC_C100005800	-
							4	JC_C100005801	-
							4	JC_C100005802	SANT, DNA-binding IPR001487; Bromodomain IPR014778; Myb, DNA-binding IPR017877; MYB-like
							4	JC_C100005803	-
							6	JC_C100005805	Biotin/lipoate A/B protein ligase
							1	JC_C100005806	Protein kinase, catalytic domain IPR001480; Curculin-like (mannose-binding) lectin IPR002290; Serine/threonine-protein kinase domain IPR011009; Protein kinase-like domain IPR017442; Serine/threonine-protein kinase-like domain IPR020635; Tyrosine-protein kinase, subgroup, catalytic domain
							0	JC_C100005810	Glycoside hydrolase, family 1 IPR017853; Glycoside hydrolase, catalytic core
							1	JC_C100005814	-
							4	JC_C100005818	Protein of unknown function DUF1666
							4	JC_C100005819	Cyclin-like F-box
							1	JC_C100005820	-
							8	JC_C100005823	-
							6	JC_C100005824	-
							1	JC_C100005827	GO:0043229//intracellular organelle
							7	JC_C100005828	Cytochrome P450
							8	JC_C100005829	Multicopper oxidase, type 1 IPR008972; Cupredoxin IPR011706; Multicopper oxidase, type 2 IPR011707; Multicopper oxidase, type 3
							2	JC_C100005831	Phosphoglycerate kinase
							2	JC_C100005832	Short-chain dehydrogenase/reductase SDR IPR016040; NAD(P)-binding domain
							4	JC_C100005833	Transcription factor CBF/NF-Y/archaeal histone IPR009072; Histone-fold
							4	JC_C100005836	Octicosapeptide/Phox/Bem1p IPR000719; Protein kinase, catalytic domain IPR001245; Tyrosine-protein kinase, catalytic domain IPR002290; Serine/threonine-protein kinase domain IPR011009; Protein kinase-like domain IPR020635; Tyrosine-protein kinase, subgroup, catalytic domain
							1	JC_C100005838	Rhodanese-like
							1	JC_C100005843	Pentatricopeptide repeat
							5	JC_C100005845	SANT, DNA-binding IPR009057; Homeodomain-like IPR014778; Myb, DNA-binding IPR017930; Myb-type HTH DNA-binding domain
							4	JC_C100005846	Ubiquitin IPR019955; Ubiquitin supergroup
							4	JC_C100005847	Auxin responsive SAUR protein
							8	JC_C100005850	-
							3	JC_C100005851	K+ potassium transporter
							0	JC_C100005854	Translation elongation factor EFG/EF2, C-terminal IPR000795; Protein synthesis factor, GTP-binding IPR004161; Translation elongation factor EFTu/EF1A, domain 2 IPR005517; Translation elongation factor EFG/EF2, domain IV IPR009000; Translation elongation/initiation factor/Ribosomal, beta-barrel IPR009022; Elongation factor G/III/V IPR020568; Ribosomal protein S5 domain 2-type fold
							8	JC_C100005856	-
							2	JC_C100005857	RNA recognition motif, RNP-1
							4	JC_C100005858	Serine/cysteine peptidase, trypsin-like
							1	JC_C100005859	Auxin responsive SAUR protein
							1	JC_C100005860	GTP-binding protein, HSR1-related IPR012676; TGS-like IPR013029; Protein of unknown function DUF933
							6	JC_C100005861	Pumilio RNA-binding region IPR016024; Armadillo-type fold
							8	JC_C100005862	Galactosyl transferase
							6	JC_C100005866	-
							4	JC_C100005867	-
							4	JC_C100005869	ENT IPR014002; Tudor-like, plant
							5	JC_C100005871	-
							5	JC_C100005874	Protein of unknown function DUF247, plant
							1	JC_C100005882	Protein kinase, catalytic domain IPR002290; Serine/threonine-protein kinase domain IPR011009; Protein kinase-like domain IPR017442; Serine/threonine-protein kinase-like domain IPR020635; Tyrosine-protein kinase, subgroup, catalytic domain
							4	JC_C100005885	WD40 repeat IPR002130; Peptidyl-prolyl cis-trans isomerase, cyclophilin-type IPR015891; Cyclophilin-like IPR017986; WD40-repeat-containing domain IPR019781; WD40 repeat, subgroup IPR019782; WD40 repeat 2
							1	JC_C100005886	Signal transduction histidine kinase, phosphotransfer (Hpt) region
							8	JC_C100005887	Domain of unknown function DUF1744
							0	JC_C100005896	tRNA isopentenyltransferase
							6	JC_C100005902	Protein kinase, catalytic domain IPR002290; Serine/threonine-protein kinase domain IPR011009; Protein kinase-like domain IPR017442; Serine/threonine-protein kinase-like domain IPR020635; Tyrosine-protein kinase, subgroup, catalytic domain
							1	JC_C100005908	C2 calcium-dependent membrane targeting IPR008973; C2 calcium/lipid-binding region, CaLB IPR018029; C2 membrane targeting protein
							7	JC_C100005915	Peptidase C1A, papain C-terminal IPR013201; Proteinase inhibitor I29, cathepsin propeptide
							0	JC_C100005923	Hydroxymethylglutaryl-CoA reductase, class I/II, catalytic IPR009023; Hydroxymethylglutaryl-CoA reductase, class I/II, NAD/NADP-binding IPR009029; Hydroxymethylglutaryl-CoA reductase, class I/II, substrate-binding
							7	JC_C100005927	-
							1	JC_C100005930	Protein kinase, catalytic domain IPR001220; Legume lectin, beta chain IPR002290; Serine/threonine-protein kinase domain IPR008985; Concanavalin A-like lectin/glucanase IPR011009; Protein kinase-like domain IPR017442; Serine/threonine-protein kinase-like domain IPR020635; Tyrosine-protein kinase, subgroup, catalytic domain
							4	JC_C100005931	Clathrin adaptor, sigma subunit/coatomer, zeta subunit IPR011012; Longin-like
							4	JC_C100005932	Histone deacetylase superfamily
							5	JC_C100005934	Protein of unknown function DUF573
							4	JC_C100005937	HhH-GPD domain IPR011257; DNA glycosylase
							2	JC_C100005940	FAD linked oxidase, N-terminal IPR016166; FAD-binding, type 2
							1	JC_C100005941	Ionotropic glutamate receptor IPR001828; Extracellular ligand-binding receptor
							7	JC_C100005943	Protein kinase, catalytic domain IPR002048; Calcium-binding EF-hand IPR002290; Serine/threonine-protein kinase domain IPR011009; Protein kinase-like domain IPR017442; Serine/threonine-protein kinase-like domain IPR018248; EF-Hand domain IPR018249; EF-HAND 2 IPR020635; Tyrosine-protein kinase, subgroup, catalytic domain
							1	JC_C100005948	Domain of unknown function DUF89
							4	JC_C100005949	Retrotransposon gag protein
							4	JC_C100005951	Peptidase M20
							8	JC_C100005953	-
							4	JC_C100005955	AT-rich interaction region IPR002068; Heat shock protein Hsp20 IPR008978; HSP20-like chaperone
							4	JC_C100005956	Zinc finger, PMZ-type IPR007527; Zinc finger, SWIM-type IPR018289; MULE transposase, conserved domain
							4	JC_C100005957	Mitochodrial transcription termination factor-related
[truncated: 9,415 more rows]

## Sheet: Cluster 0
Cluster 0	N=1018 genes
	< return		Name	Description
			JC_C100023344	RHO protein GDP dissociation inhibitor IPR014756; Immunoglobulin E-set
			JC_C100023418	Poly(ADP-ribose) polymerase, catalytic region
			JC_C100016391	Transmembrane receptor, eukaryota
			JC_C100022660	Transcription factor, SBP-box
			JC_C100011949	Mog1/PsbP/DUF1795, alpha/beta/alpha sandwich
			JC_C100024565	Short-chain dehydrogenase/reductase SDR IPR016040; NAD(P)-binding domain
			JC_C100013891	Transcription factor, TCP
			JC_C100012609	Chalcone isomerase, subgroup IPR016087; Chalcone isomerase
			JC_C100004286	Chlorophyll A-B binding protein
			JC_C100016440	Protein of unknown function DUF37
			JC_C100021352	Ubiquitin supergroup
			JC_C100011889	Heat shock protein Hsp20 IPR008978; HSP20-like chaperone
			JC_C100005416	-
			JC_C100009285	Protein kinase, catalytic domain IPR001611; Leucine-rich repeat IPR002290; Serine/threonine-protein kinase domain IPR003591; Leucine-rich repeat, typical subtype IPR011009; Protein kinase-like domain IPR013210; Leucine-rich repeat, N-terminal IPR017442; Serine/threonine-protein kinase-like domain IPR020635; Tyrosine-protein kinase, subgroup, catalytic domain
			JC_C100011574	Harpin-induced 1
			JC_C100012703	GO:0043231//intracellular membrane-bounded organelle
			JC_C100018242	Protein kinase, catalytic domain IPR002290; Serine/threonine-protein kinase domain IPR011009; Protein kinase-like domain IPR017442; Serine/threonine-protein kinase-like domain IPR020635; Tyrosine-protein kinase, subgroup, catalytic domain
			JC_C100020246	HECT IPR017442; Serine/threonine-protein kinase-like domain
			JC_C100009233	GO:0043231//intracellular membrane-bounded organelle
			JC_C100022492	Cytochrome P450
			JC_C100031070	Pentatricopeptide repeat
			JC_C100006762	Macrophage migration inhibitory factor
			JC_C100024619	Calcium-binding EF-hand IPR018248; EF-Hand domain IPR018249; EF-HAND 2
			JC_C100004987	Pathogenesis-related transcriptional factor/ERF, DNA-binding IPR016177; DNA-binding, integrase-type
			JC_C100000901	Zinc finger, RING-type IPR018957; Zinc finger, C3HC4 RING-type
			JC_C100006829	Mitochondrial substrate carrier IPR018108; Mitochondrial substrate/solute carrier
			JC_C100007880	-
			JC_C100017800	Alpha/beta hydrolase fold-1
			JC_C100002375	-
			JC_C100004822	Bet v I allergen
			JC_C100013297	Heat shock protein Hsp20 IPR008978; HSP20-like chaperone
			JC_C100026808	Aldo/keto reductase
			JC_C100000189	Acetohydroxy acid isomeroreductase C-terminal IPR008927; 6-phosphogluconate dehydrogenase, C-terminal-like IPR013116; Acetohydroxy acid isomeroreductase, catalytic IPR016040; NAD(P)-binding domain
			JC_C100010944	-
			JC_C100005360	Pentatricopeptide repeat
			JC_C100006817	Uncharacterised protein family UPF0497, trans-membrane plant
			JC_C100022748	GO:0009534//chloroplast thylakoid
			JC_C100012896	GO:0005886//plasma membrane
			JC_C100016737	Protein phosphatase 2C-related
			JC_C100018632	Protein of unknown function DUF2261, transmembrane
			JC_C100001192	DNA-binding WRKY
			JC_C100004383	-
			JC_C100011047	Photosystem II oxygen evolving complex protein PsbP IPR016124; Mog1/PsbP/DUF1795, alpha/beta/alpha sandwich
			JC_C100015064	Tify IPR018467; CCT domain-like
			JC_C100021579	UspA
			JC_C100026714	-
			JC_C100000401	GO:0031224//intrinsic to membrane;GO:0009534//chloroplast thylakoid
			JC_C100013607	GO:0016020//membrane
			JC_C100014091	Zinc finger, RING-type IPR018957; Zinc finger, C3HC4 RING-type
			JC_C100017194	Pathogenesis-related transcriptional factor/ERF, DNA-binding IPR016177; DNA-binding, integrase-type
			JC_C100022430	Aminotransferase, class IV
			JC_C100024868	Haem peroxidase, plant/fungal/bacterial IPR010255; Haem peroxidase
			JC_C100009717	-
			JC_C100019598	Cellulose synthase
			JC_C100034504	VQ
			JC_C100010935	SET IPR003105; SRA-YDG IPR003606; Pre-SET zinc-binding sub-group IPR003616; Post-SET zinc-binding region IPR007728; Pre-SET zinc-binding region
			JC_C100013417	Peptidase S54, rhomboid
			JC_C100013752	ABC transporter-like IPR003593; ATPase, AAA+ type, core IPR013525; ABC-2 type transporter
			JC_C100015861	Cyclin-like F-box IPR006553; Leucine-rich repeat, cysteine-containing subtype
			JC_C100017850	Glycoside hydrolase, family 16 IPR008985; Concanavalin A-like lectin/glucanase IPR010713; Xyloglucan endo-transglycosylase, C-terminal
			JC_C100022685	UDP-glucuronosyl/UDP-glucosyltransferase
			JC_C100025019	Membrane bound O-acyl transferase, MBOAT
			JC_C100028864	Cytochrome P450
			JC_C100029242	Pentatricopeptide repeat
			JC_C100030630	Pollen Ole e 1 allergen/extensin
			JC_C100009900	Protein kinase, catalytic domain IPR002290; Serine/threonine-protein kinase domain IPR011009; Protein kinase-like domain IPR017442; Serine/threonine-protein kinase-like domain IPR020635; Tyrosine-protein kinase, subgroup, catalytic domain
			JC_C100007676	Pentatricopeptide repeat
			JC_C100023720	Late embryogenesis abundant protein 3
			JC_C100006230	Zinc finger, RING-type IPR018957; Zinc finger, C3HC4 RING-type
			JC_C100007503	-
			JC_C100017791	Cytochrome P450
			JC_C100001572	GO:0044464//cell part
			JC_C100020173	Prenylated rab acceptor PRA1
			JC_C100026543	Protein kinase, catalytic domain IPR000742; EGF-like, type 3 IPR000858; S-locus glycoprotein IPR001245; Tyrosine-protein kinase, catalytic domain IPR002290; Serine/threonine-protein kinase domain IPR003609; Apple-like IPR011009; Protein kinase-like domain IPR013227; PAN-2 domain IPR020635; Tyrosine-protein kinase, subgroup, catalytic domain
			JC_C100000866	-
			JC_C100016187	NAD(P)-binding domain IPR020828; Glyceraldehyde 3-phosphate dehydrogenase, NAD(P) binding domain IPR020829; Glyceraldehyde 3-phosphate dehydrogenase, catalytic domain
			JC_C100011344	Peptidase S16, lon N-terminal
			JC_C100004951	Mitochodrial transcription termination factor-related
			JC_C100007821	Pentatricopeptide repeat
			JC_C100022167	Mitochodrial transcription termination factor-related
			JC_C100011995	Uncharacterised protein family UPF0114, prokaryotic
			JC_C100015328	NAD(P)H-quinone oxidoreductase subunit L
			JC_C100009828	Pentatricopeptide repeat
			JC_C100018715	Protein of unknown function DUF846, eukaryotic
			JC_C100014639	Protein kinase, catalytic domain IPR002290; Serine/threonine-protein kinase domain IPR011009; Protein kinase-like domain IPR017442; Serine/threonine-protein kinase-like domain IPR020635; Tyrosine-protein kinase, subgroup, catalytic domain
			JC_C100015645	-
			JC_C100023803	ABC transporter, transmembrane region IPR003439; ABC transporter-like IPR003593; ATPase, AAA+ type, core IPR011527; ABC transporter, transmembrane region, type 1 IPR017940; ABC transporter integral membrane type 1
			JC_C100003259	-
			JC_C100031807	-
			JC_C100003983	Protein kinase, catalytic domain IPR002290; Serine/threonine-protein kinase domain IPR004041; NAF domain IPR011009; Protein kinase-like domain IPR017442; Serine/threonine-protein kinase-like domain IPR018451; NAF/FISL domain IPR020635; Tyrosine-protein kinase, subgroup, catalytic domain
			JC_C100023603	-
			JC_C100010343	Protein of unknown function DUF581
			JC_C100026853	Cytochrome P450
			JC_C100033095	Bromodomain transcription factor IPR009072; Histone-fold
			JC_C100002197	-
			JC_C100008487	Ribosomal protein S9 IPR020568; Ribosomal protein S5 domain 2-type fold
			JC_C100012278	Pentatricopeptide repeat
			JC_C100018989	Exostosin-like
			JC_C100022557	-
			JC_C100008756	-
			JC_C100001102	-
			JC_C100002240	-
			JC_C100009981	Ribosomal protein S1, RNA binding domain IPR016027; Nucleic acid-binding, OB-fold-like
			JC_C100016581	Metallophosphoesterase
			JC_C100017232	Pentatricopeptide repeat
			JC_C100023959	GO:0009536//plastid
			JC_C100006378	PAP fibrillin
			JC_C100012493	Cyclin-like F-box
			JC_C100013286	Transcription factor, FAR1-related IPR006564; Zinc finger, PMZ-type IPR007527; Zinc finger, SWIM-type IPR018289; MULE transposase, conserved domain
			JC_C100015504	-
			JC_C100034950	-
			JC_C100006451	UDP-glucuronosyl/UDP-glucosyltransferase
			JC_C100024357	Ribosomal protein L7Ae/L30e/S12e/Gadd45
			JC_C100005214	Protein of unknown function DUF1210
			JC_C100014919	GO:0009534//chloroplast thylakoid
			JC_C100025565	-
			JC_C100014698	Pentatricopeptide repeat
			JC_C100028536	Interferon-related developmental regulator, N-terminal IPR016024; Armadillo-type fold
			JC_C100003788	UspA
			JC_C100009541	-
			JC_C100008292	Major facilitator superfamily MFS-1 IPR016196; Major facilitator superfamily, general substrate transporter
			JC_C100014558	Pentatricopeptide repeat
			JC_C100016771	-
			JC_C100006123	Harpin-induced 1
			JC_C100023427	Crotonase, core
			JC_C100009994	UDP-glucuronosyl/UDP-glucosyltransferase IPR004276; Glycosyl transferase, family 28
			JC_C100021603	UBX IPR006577; UAS
			JC_C100003289	Short-chain dehydrogenase/reductase SDR IPR016040; NAD(P)-binding domain
			JC_C100004268	Protein of unknown function DUF1218
			JC_C100004593	-
			JC_C100004653	Pentatricopeptide repeat
			JC_C100018309	Protein kinase, catalytic domain IPR001611; Leucine-rich repeat IPR002290; Serine/threonine-protein kinase domain IPR011009; Protein kinase-like domain IPR013210; Leucine-rich repeat, N-terminal IPR017442; Serine/threonine-protein kinase-like domain IPR020635; Tyrosine-protein kinase, subgroup, catalytic domain
			JC_C100021578	Protein kinase, catalytic domain IPR001220; Legume lectin, beta chain IPR002290; Serine/threonine-protein kinase domain IPR008985; Concanavalin A-like lectin/glucanase IPR011009; Protein kinase-like domain IPR017442; Serine/threonine-protein kinase-like domain IPR020635; Tyrosine-protein kinase, subgroup, catalytic domain
			JC_C100022838	Alpha/beta hydrolase fold-1
			JC_C100024234	Glycoside hydrolase, family 1 IPR017853; Glycoside hydrolase, catalytic core
			JC_C100021475	Protein of unknown function DUF674
			JC_C100021117	AMP-dependent synthetase/ligase
			JC_C100004543	PAP fibrillin
			JC_C100011757	FAD-dependent pyridine nucleotide-disulphide oxidoreductase
			JC_C100019529	Aspartate/ornithine carbamoyltransferase IPR006131; Aspartate/ornithine carbamoyltransferase, Asp/Orn-binding region IPR006132; Aspartate/ornithine carbamoyltransferase, carbamoyl-P binding
			JC_C100004796	GO:0043231//intracellular membrane-bounded organelle;GO:0044444//cytoplasmic part
			JC_C100023067	GO:0043231//intracellular membrane-bounded organelle
			JC_C100014530	Glycoside hydrolase, family 17 IPR012946; X8 IPR017853; Glycoside hydrolase, catalytic core
			JC_C100013371	-
			JC_C100015673	HEAT IPR019442; Protein of unknown function DUF2428, death-receptor-like
			JC_C100014931	Protein of unknown function DUF1677, plant
			JC_C100006519	Pentatricopeptide repeat
			JC_C100014756	Oxoglutarate/iron-dependent oxygenase
			JC_C100001350	-
			JC_C100024019	Pentatricopeptide repeat
			JC_C100012946	-
			JC_C100010607	Protein of unknown function CP12 IPR016040; NAD(P)-binding domain IPR020828; Glyceraldehyde 3-phosphate dehydrogenase, NAD(P) binding domain IPR020829; Glyceraldehyde 3-phosphate dehydrogenase, catalytic domain
			JC_C100007571	GCN5-related N-acetyltransferase IPR016181; Acyl-CoA N-acyltransferase
			JC_C100025055	GO:0016020//membrane
			JC_C100021753	-
			JC_C100023843	No apical meristem (NAM) protein
			JC_C100034147	GroES-like IPR013149; Alcohol dehydrogenase, zinc-binding IPR016040; NAD(P)-binding domain IPR020843; Polyketide synthase, enoylreductase
			JC_C100019907	High mobility group, HMG1/HMG2 IPR001606; AT-rich interaction region IPR009071; High mobility group, superfamily
			JC_C100010942	-
			JC_C100021330	Nucleic acid-binding, OB-fold-like
			JC_C100022148	UDP-glucuronosyl/UDP-glucosyltransferase
			JC_C100026790	Toll-Interleukin receptor
			JC_C100001910	RNA recognition motif, RNP-1
			JC_C100003443	Major facilitator superfamily MFS-1 IPR016196; Major facilitator superfamily, general substrate transporter
			JC_C100001474	-
			JC_C100032208	Exo70 exocyst complex subunit
			JC_C100000473	Exostosin-like
			JC_C100025364	Pentatricopeptide repeat
			JC_C100010997	Oligopeptide transporter OPT superfamily
			JC_C100016975	AMP-dependent synthetase/ligase
			JC_C100010536	GO:0044464//cell part
			JC_C100021715	-
			JC_C100026498	FBD
			JC_C100021079	Globin, subset IPR009050; Globin-like
			JC_C100022290	Major facilitator superfamily MFS-1 IPR016196; Major facilitator superfamily, general substrate transporter
			JC_C100019757	-
			JC_C100003184	GO:0031090//organelle membrane;GO:0043231//intracellular membrane-bounded organelle
			JC_C100005527	-
			JC_C100026159	Major intrinsic protein
			JC_C100016714	D-isomer specific 2-hydroxyacid dehydrogenase, catalytic region IPR006140; D-isomer specific 2-hydroxyacid dehydrogenase, NAD-binding IPR016040; NAD(P)-binding domain
			JC_C100025440	Chalcone/stilbene synthase, C-terminal IPR013601; FAE1/Type III polyketide synthase-like protein IPR016039; Thiolase-like
			JC_C100030516	Vitamin B6 biosynthesis protein IPR008867; Thiazole biosynthesis
			JC_C100015147	Cyclin-like F-box
			JC_C100022434	WRC IPR014978; Glutamine-Leucine-Glutamine, QLQ
			JC_C100000912	No apical meristem (NAM) protein
			JC_C100023378	General substrate transporter IPR016196; Major facilitator superfamily, general substrate transporter
			JC_C100016044	ATPase, AAA-type, core
			JC_C100005448	-
			JC_C100007627	Homeobox IPR009057; Homeodomain-like
			JC_C100022739	-
			JC_C100018364	Lipopolysaccharide-modifying protein IPR008539; Protein of unknown function DUF821, CAP10-like
			JC_C100002399	Pentatricopeptide repeat
			JC_C100010830	Protein of unknown function DUF677
			JC_C100021837	-
			JC_C100005459	Zinc finger, C2H2-type IPR015880; Zinc finger, C2H2-like
			JC_C100013271	Amino acid transporter, transmembrane
			JC_C100012207	-
			JC_C100025130	Protein of unknown function DUF1677, plant
			JC_C100024648	Light chain 3 (LC3)
			JC_C100006693	-
			JC_C100008330	Hly-III related
			JC_C100018861	-
			JC_C100007344	Peptidyl-tRNA hydrolase
			JC_C100033544	Auxin responsive SAUR protein
			JC_C100002385	Photosystem II oxygen evolving complex protein PsbP IPR016124; Mog1/PsbP/DUF1795, alpha/beta/alpha sandwich
			JC_C100020422	Late embryogenesis abundant protein 3
			JC_C100026107	NUDIX hydrolase domain IPR015797; NUDIX hydrolase domain-like
			JC_C100006686	UDP-glucuronosyl/UDP-glucosyltransferase
			JC_C100025030	Protein kinase, catalytic domain IPR002290; Serine/threonine-protein kinase domain IPR003613; U box domain IPR006016; UspA IPR011009; Protein kinase-like domain IPR017442; Serine/threonine-protein kinase-like domain IPR020635; Tyrosine-protein kinase, subgroup, catalytic domain
			JC_C100017811	Acyl-CoA-binding protein, ACBP
			JC_C100017442	Alpha/beta hydrolase fold-1
			JC_C100019697	Glycoside hydrolase, family 1 IPR017853; Glycoside hydrolase, catalytic core
			JC_C100017836	-
			JC_C100014140	GO:0043231//intracellular membrane-bounded organelle
			JC_C100004464	SANT, DNA-binding IPR009057; Homeodomain-like IPR014778; Myb, DNA-binding IPR017930; Myb-type HTH DNA-binding domain
			JC_C100002524	Polynucleotidyl transferase, ribonuclease H fold
			JC_C100027131	IQ calmodulin-binding region
			JC_C100024748	AIG2-like
			JC_C100024642	Auxin responsive SAUR protein
			JC_C100020949	Fructose-1,6-bisphosphatase
			JC_C100025944	Heat shock protein Hsp20 IPR008978; HSP20-like chaperone
			JC_C100009998	-
			JC_C100006909	Nodulin-like IPR016196; Major facilitator superfamily, general substrate transporter
			JC_C100016755	GRAS transcription factor
			JC_C100026962	GO:0009536//plastid
			JC_C100020208	-
			JC_C100019580	Pectate lyase/Amb allergen IPR011050; Pectin lyase fold/virulence factor
			JC_C100007385	Peptidyl-prolyl cis-trans isomerase, cyclophilin-type IPR015891; Cyclophilin-like
			JC_C100023215	-
			JC_C100022878	B302 (SPRY)-like IPR003877; SPla/RYanodine receptor SPRY IPR018355; SPla/RYanodine receptor subgroup
			JC_C100023056	Cyclin-like F-box IPR006597; Sel1-like
			JC_C100022390	Pentatricopeptide repeat
			JC_C100007557	-
			JC_C100000421	-
			JC_C100004159	Mitochodrial transcription termination factor-related
			JC_C100025361	-
			JC_C100022052	Oxoglutarate/iron-dependent oxygenase
			JC_C100030653	-
			JC_C100026653	-
			JC_C100004260	ATPase, AAA+ type, core
			JC_C100004488	RNA recognition motif, RNP-1
			JC_C100014842	Major sperm protein IPR008962; PapD-like
			JC_C100004097	Phosphatidic acid phosphatase type 2/haloperoxidase
			JC_C100004577	C2 calcium-dependent membrane targeting IPR008973; C2 calcium/lipid-binding region, CaLB IPR018029; C2 membrane targeting protein
			JC_C100000909	Pentatricopeptide repeat
			JC_C100020810	Crotonase, core
			JC_C100012277	D-galactoside/L-rhamnose binding SUEL lectin IPR001944; Glycoside hydrolase, family 35 IPR008979; Galactose-binding like IPR017853; Glycoside hydrolase, catalytic core
			JC_C100010602	No apical meristem (NAM) protein
			JC_C100021847	-
			JC_C100001478	Phosphatidylinositol N-acetylglucosaminyltransferase
			JC_C100005280	Maf-like protein
			JC_C100012780	Peptidase S10, serine carboxypeptidase
			JC_C100025359	Dynamin central region IPR001401; Dynamin, GTPase region
			JC_C100003281	Protein of unknown function DUF668
			JC_C100014378	Nodulin-like IPR016196; Major facilitator superfamily, general substrate transporter
			JC_C100031432	Pentatricopeptide repeat
			JC_C100016704	Reticulon
			JC_C100009324	Auxin responsive SAUR protein
			JC_C100015719	-
			JC_C100016780	GO:0031981//nuclear lumen
			JC_C100009059	Calponin-like actin-binding IPR016146; Calponin-homology
			JC_C100025853	GO:0009534//chloroplast thylakoid
			JC_C100014914	Copper amine oxidase, C-terminal
			JC_C100024313	GO:0043231//intracellular membrane-bounded organelle
			JC_C100013104	Mitochodrial transcription termination factor-related
			JC_C100014425	ATPase, AAA+ type, core
			JC_C100018708	Zinc finger, CCCH-type IPR013085; Zinc finger, U1-C type
			JC_C100008965	Short-chain dehydrogenase/reductase SDR IPR016040; NAD(P)-binding domain
			JC_C100008802	Pentatricopeptide repeat
			JC_C100009510	Tetratricopeptide region IPR019734; Tetratricopeptide repeat
			JC_C100023216	-
			JC_C100016987	Zinc finger, LIM-type
			JC_C100013951	Sulphate transporter
			JC_C100009960	Harpin-induced 1
			JC_C100007967	Heat shock protein Hsp20 IPR008978; HSP20-like chaperone
			JC_C100021502	GO:0009532//plastid stroma
			JC_C100009146	Aldehyde dehydrogenase IPR016161; Aldehyde/histidinol dehydrogenase
			JC_C100011273	GO:0009526//plastid envelope
			JC_C100012011	Leucine-rich repeat
			JC_C100010941	Zinc finger, CCHC-type
			JC_C100013694	D-isomer specific 2-hydroxyacid dehydrogenase, catalytic region IPR006140; D-isomer specific 2-hydroxyacid dehydrogenase, NAD-binding IPR016040; NAD(P)-binding domain
			JC_C100023804	ABC transporter, transmembrane region IPR003439; ABC transporter-like IPR003593; ATPase, AAA+ type, core IPR011527; ABC transporter, transmembrane region, type 1 IPR017940; ABC transporter integral membrane type 1
			JC_C100004819	Crotonase, core
			JC_C100028154	SANT, DNA-binding IPR009057; Homeodomain-like IPR014778; Myb, DNA-binding IPR017930; Myb-type HTH DNA-binding domain
			JC_C100026446	Protein kinase, catalytic domain IPR001245; Tyrosine-protein kinase, catalytic domain IPR002290; Serine/threonine-protein kinase domain IPR011009; Protein kinase-like domain IPR020635; Tyrosine-protein kinase, subgroup, catalytic domain
			JC_C100000963	Leucine-rich repeat IPR002182; NB-ARC
			JC_C100013113	Uncharacterised protein family UPF0041
			JC_C100025711	Leucine-rich repeat, cysteine-containing subtype
			JC_C100006958	SKP1 component IPR011333; BTB/POZ fold IPR016072; SKP1 component, dimerisation IPR016073; SKP1 component, POZ
			JC_C100018528	Pentatricopeptide repeat
			JC_C100010249	Tetratricopeptide TPR-1 IPR003107; RNA-processing protein, HAT helix IPR013026; Tetratricopeptide region IPR013105; Tetratricopeptide TPR2 IPR019734; Tetratricopeptide repeat
			JC_C100008430	-
			JC_C100013095	Peptidase M48, Ste24p
			JC_C100021198	C2 calcium-dependent membrane targeting IPR000909; Phospholipase C, phosphatidylinositol-specific , X region IPR001711; Phospholipase C, phosphatidylinositol-specific, Y domain IPR008973; C2 calcium/lipid-binding region, CaLB IPR015359; Phospholipase C, phosphoinositol-specific, EF-hand-like IPR017946; PLC-like phosphodiesterase, TIM beta/alpha-barrel domain IPR018029; C2 membrane targeting prote…
			JC_C100018802	Pentatricopeptide repeat
			JC_C100035212	-
			JC_C100019664	Chlorophyll A-B binding protein
			JC_C100034536	-
			JC_C100018447	-
			JC_C100021313	Zinc finger, C2H2-type IPR015880; Zinc finger, C2H2-like
			JC_C100026087	-
			JC_C100011751	Harpin-induced 1
			JC_C100020345	Armadillo IPR016024; Armadillo-type fold
			JC_C100020786	Glycoside hydrolase, family 17 IPR012946; X8 IPR017853; Glycoside hydrolase, catalytic core
			JC_C100015097	Pentatricopeptide repeat
			JC_C100026076	Pentatricopeptide repeat
			JC_C100004906	NB-ARC
			JC_C100031951	NB-ARC
			JC_C100004480	-
			JC_C100024027	C2 calcium-dependent membrane targeting IPR008973; C2 calcium/lipid-binding region, CaLB
			JC_C100000020	-
			JC_C100011966	-
			JC_C100026069	Zinc finger, RING-type IPR018957; Zinc finger, C3HC4 RING-type
			JC_C100026386	Helicase, superfamily 1/2, ATP-binding domain, DinG/Rad3-type
			JC_C100000120	HEAT IPR016024; Armadillo-type fold
			JC_C100001732	Protein of unknown function DUF2010
			JC_C100017078	GO:0009532//plastid stroma
			JC_C100022161	Pentatricopeptide repeat
			JC_C100014410	Protein of unknown function DUF597
			JC_C100008212	RNA-binding, CRM domain
			JC_C100007212	Pentatricopeptide repeat
			JC_C100025928	ATPase, F1 complex, gamma subunit
			JC_C100015255	-
			JC_C100022002	-
			JC_C100023992	GO:0031461//cullin-RING ubiquitin ligase complex
			JC_C100002665	Polyadenylate-binding protein/Hyperplastic disc protein IPR011545; DNA/RNA helicase, DEAD/DEAH box type, N-terminal IPR014001; DEAD-like helicase, N-terminal IPR014021; Helicase, superfamily 1/2, ATP-binding domain
			JC_C100007826	Pentatricopeptide repeat
			JC_C100021124	Glycosyl transferase, group 1 IPR013234; PIGA, GPI anchor biosynthesis
			JC_C100020448	HEAT IPR013598; Exportin-1/Importin-beta-like IPR016024; Armadillo-type fold
			JC_C100007648	Transcription factor, SBP-box
			JC_C100020155	Kelch repeat type 1 IPR011043; Galactose oxidase/kelch, beta-propeller
			JC_C100003394	Harpin-induced 1
			JC_C100015031	DNA-binding WRKY
			JC_C100004693	Biotin/lipoate A/B protein ligase
			JC_C100003441	Smr protein/MutS2 C-terminal IPR002885; Pentatricopeptide repeat
			JC_C100024108	PAP fibrillin
			JC_C100007836	UDP-glucuronosyl/UDP-glucosyltransferase
			JC_C100022111	Exo70 exocyst complex subunit
			JC_C100024966	Cyclin-like F-box
			JC_C100007508	Glycoside hydrolase, family 16 IPR008985; Concanavalin A-like lectin/glucanase IPR010713; Xyloglucan endo-transglycosylase, C-terminal
			JC_C100024425	GO:0009528//plastid inner membrane
			JC_C100032647	Pentatricopeptide repeat
			JC_C100023430	Pentatricopeptide repeat
			JC_C100028211	-
			JC_C100021992	-
			JC_C100024675	Uncharacterised protein family UPF0565
			JC_C100002953	Zinc finger, RING-type IPR018957; Zinc finger, C3HC4 RING-type
			JC_C100014972	Pentatricopeptide repeat
			JC_C100010472	Pentatricopeptide repeat
			JC_C100016803	Transcriptional factor B3
			JC_C100006507	Transcription factor CBF/NF-Y/archaeal histone IPR009072; Histone-fold
			JC_C100019457	Calycin-like IPR013208; Lipocalin-like
			JC_C100017884	Protein of unknown function DUF241, plant
			JC_C100019343	GO:0009534//chloroplast thylakoid
			JC_C100002414	GO:0043231//intracellular membrane-bounded organelle
			JC_C100026796	5-formyltetrahydrofolate cyclo-ligase
			JC_C100024500	-
			JC_C100001294	Photosystem I, PsaA/PsaB
			JC_C100001950	Photosystem II protein PsbR
			JC_C100034022	Cyclin-like F-box
			JC_C100019215	Phosphoglycerate mutase
			JC_C100017391	Pentatricopeptide repeat
			JC_C100008623	Leucine-rich repeat IPR002182; NB-ARC IPR003593; ATPase, AAA+ type, core
			JC_C100025793	Protein kinase, catalytic domain IPR001611; Leucine-rich repeat IPR002290; Serine/threonine-protein kinase domain IPR011009; Protein kinase-like domain IPR017442; Serine/threonine-protein kinase-like domain IPR020635; Tyrosine-protein kinase, subgroup, catalytic domain
			JC_C100003612	GO:0031410//cytoplasmic vesicle
			JC_C100014582	Pentatricopeptide repeat
			JC_C100013109	Ankyrin repeat IPR020683; Ankyrin repeat-containing domain
			JC_C100022218	Protein of unknown function DUF1336
			JC_C100006287	-
			JC_C100004626	FeS cluster biogenesis
			JC_C100016856	Glycoside hydrolase, family 14 IPR017853; Glycoside hydrolase, catalytic core
			JC_C100021700	Pentatricopeptide repeat
			JC_C100014898	Mitochondrial substrate carrier IPR018108; Mitochondrial substrate/solute carrier
			JC_C100008193	-
			JC_C100004226	Mitochodrial transcription termination factor-related
			JC_C100023995	-
			JC_C100012991	Lipase, GDSL
			JC_C100025472	GO:0009536//plastid
			JC_C100010306	Pseudouridine synthase I, TruA, alpha/beta domain IPR020103; Pseudouridine synthase, catalytic domain
			JC_C100011409	Zinc finger, Dof-type
			JC_C100026084	-
			JC_C100007566	-
			JC_C100012876	GO:0042579//microbody
			JC_C100025061	Dimeric alpha-beta barrel IPR013097; Stress responsive alpha-beta barrel
			JC_C100010333	GTP-binding protein, HSR1-related
			JC_C100001610	Transcription factor jumonji/aspartyl beta-hydroxylase IPR013109; Cupin 4
			JC_C100024758	Protein kinase, catalytic domain IPR004147; ABC-1 IPR011009; Protein kinase-like domain
			JC_C100029633	SOUL haem-binding protein
			JC_C100009210	Peptidyl-prolyl cis-trans isomerase, cyclophilin-type IPR015891; Cyclophilin-like
			JC_C100004479	Transcription elongation factor S-II, central region IPR012921; Spen paralogue and orthologue SPOC, C-terminal IPR017890; Transcription elongation factor S-IIM
			JC_C100022246	Pentatricopeptide repeat
			JC_C100007011	Pentatricopeptide repeat
			JC_C100021782	UspA
			JC_C100011290	Peroxisomal biogenesis factor 11
			JC_C100016555	-
			JC_C100013933	Pentatricopeptide repeat
			JC_C100002495	-
			JC_C100006904	-
			JC_C100012662	SWIB/MDM2 domain IPR019835; SWIB domain
			JC_C100032513	Pentatricopeptide repeat
			JC_C100018253	Zinc finger, CCCH-type IPR002110; Ankyrin repeat IPR020683; Ankyrin repeat-containing domain
			JC_C100002616	Methyltransferase type 12
			JC_C100005427	GRAS transcription factor
			JC_C100034141	Mitochodrial transcription termination factor-related
			JC_C100004372	Protein kinase, catalytic domain IPR002290; Serine/threonine-protein kinase domain IPR011009; Protein kinase-like domain IPR017442; Serine/threonine-protein kinase-like domain IPR020635; Tyrosine-protein kinase, subgroup, catalytic domain
			JC_C100010247	Sodium ion transport-associated
			JC_C100025411	Ubiquitin supergroup
			JC_C100005569	Cation transporter
			JC_C100020104	-
			JC_C100024672	Lactate/malate dehydrogenase IPR015955; Lactate dehydrogenase/glycoside hydrolase, family 4, C-terminal IPR016040; NAD(P)-binding domain
			JC_C100001399	SANT, DNA-binding IPR009057; Homeodomain-like IPR014778; Myb, DNA-binding IPR017930; Myb-type HTH DNA-binding domain
			JC_C100023282	Tetratricopeptide region IPR013105; Tetratricopeptide TPR2 IPR019734; Tetratricopeptide repeat
			JC_C100022581	No apical meristem (NAM) protein
			JC_C100033867	Pentatricopeptide repeat
			JC_C100025595	Lycopene beta/epsilon cyclase
			JC_C100014781	Disease resistance/zinc finger/chromosome condensation-like region
			JC_C100016671	Protein phosphatase 2C-related IPR014045; Protein phosphatase 2C, N-terminal
			JC_C100003922	Toll-Interleukin receptor
			JC_C100001456	Membrane attack complex component/perforin (MACPF) domain IPR020865; Membrane attack complex component/perforin (MACPF) domain, metazoa
			JC_C100013685	Methyltransferase-16, putative
			JC_C100025760	Protein of unknown function DUF1764, eukaryotic
			JC_C100006672	Protein of unknown function DUF1313
			JC_C100021899	GO:0016020//membrane
			JC_C100008731	NB-ARC
			JC_C100002638	Class I peptide chain release factor IPR005139; Peptide chain release factor
			JC_C100008050	Peptidase S8A, DUF1034 C-terminal
			JC_C100017803	Protein phosphatase 2C-related IPR014045; Protein phosphatase 2C, N-terminal
			JC_C100025292	Cyclic nucleotide-binding IPR005821; Ion transport IPR018490; Cyclic nucleotide-binding-like
			JC_C100014959	Aldo/keto reductase
			JC_C100012290	Glycoside hydrolase, family 31
			JC_C100019730	-
			JC_C100003729	-
			JC_C100023124	ABC transporter, transmembrane region IPR003439; ABC transporter-like IPR003593; ATPase, AAA+ type, core IPR011527; ABC transporter, transmembrane region, type 1 IPR017940; ABC transporter integral membrane type 1
			JC_C100016944	ELM2 IPR001606; AT-rich interaction region
			JC_C100009784	Pentatricopeptide repeat
			JC_C100011547	-
			JC_C100017435	Peptidase S9, prolyl oligopeptidase, catalytic domain IPR004106; Peptidase S9A, oligopeptidase, N-terminal beta-propeller
			JC_C100021399	Lateral organ boundaries, LOB
			JC_C100004124	Ubiquitin-conjugating enzyme, E2 IPR016135; Ubiquitin-conjugating enzyme/RWD-like
			JC_C100019152	Peptidase S1/S6, chymotrypsin/Hap IPR001478; PDZ/DHR/GLGF IPR009003; Serine/cysteine peptidase, trypsin-like
			JC_C100004090	DNA-repair protein, UmuC-like IPR017961; DNA polymerase, Y-family, little finger domain IPR017963; DNA-repair protein, UmuC-like, N-terminal
			JC_C100027812	Pentatricopeptide repeat
			JC_C100017046	Aminotransferase, class I/II IPR015424; Pyridoxal phosphate-dependent transferase, major region
			JC_C100018068	Cyclin-like F-box
			JC_C100030588	Pentatricopeptide repeat
			JC_C100001053	Major facilitator superfamily MFS-1 IPR016196; Major facilitator superfamily, general substrate transporter
			JC_C100008986	Argonaute/Dicer protein, PAZ IPR003165; Stem cell self-renewal protein Piwi IPR012337; Polynucleotidyl transferase, ribonuclease H fold IPR014811; Domain of unknown function DUF1785
			JC_C100011682	RNA recognition motif, RNP-1
			JC_C100014375	HNH endonuclease IPR003615; HNH nuclease
			JC_C100022697	Queuine/other tRNA-ribosyltransferase
			JC_C100025289	Cyclin-like F-box
			JC_C100014813	Pentatricopeptide repeat
			JC_C100021711	Pentatricopeptide repeat
			JC_C100007921	Protein of unknown function DUF828, plant IPR013666; Pleckstrin-like, plant
			JC_C100008755	CobN/magnesium chelatase
			JC_C100013380	Protein kinase, catalytic domain IPR002290; Serine/threonine-protein kinase domain IPR011009; Protein kinase-like domain IPR017442; Serine/threonine-protein kinase-like domain IPR020635; Tyrosine-protein kinase, subgroup, catalytic domain
			JC_C100023664	Mitochodrial transcription termination factor-related
			JC_C100034616	DNA mismatch repair protein MutS, C-terminal IPR007696; DNA mismatch repair protein MutS, core IPR007861; DNA mismatch repair protein MutS, clamp
			JC_C100004445	Glutathione-dependent formaldehyde-activating, GFA
			JC_C100005258	ATP-NAD/AcoX kinase IPR016064; ATP-NAD kinase, PpnK-type
			JC_C100011403	Protein kinase, catalytic domain IPR002290; Serine/threonine-protein kinase domain IPR011009; Protein kinase-like domain IPR017442; Serine/threonine-protein kinase-like domain IPR020635; Tyrosine-protein kinase, subgroup, catalytic domain
			JC_C100027428	Pentatricopeptide repeat
			JC_C100021187	Cytochrome B561-related, N-terminal
			JC_C100011008	Zinc finger, PHD-type IPR011011; Zinc finger, FYVE/PHD-type IPR019787; Zinc finger, PHD-finger
			JC_C100011989	Amine oxidase
			JC_C100021422	UDP-glucuronosyl/UDP-glucosyltransferase
			JC_C100026072	Pathogenesis-related transcriptional factor/ERF, DNA-binding IPR016177; DNA-binding, integrase-type
			JC_C100003067	Zinc finger, B-box IPR010402; CCT domain
			JC_C100018349	Zinc finger, C2H2-type
			JC_C100024229	Glycoside hydrolase, family 1 IPR017853; Glycoside hydrolase, catalytic core
			JC_C100002829	Leucine-rich repeat IPR002182; NB-ARC
			JC_C100002309	Pectin lyase fold/virulence factor
			JC_C100005752	-
			JC_C100013421	Pentatricopeptide repeat
			JC_C100016667	Uncharacterised protein family UPF0089 IPR009721; Protein of unknown function DUF1298
			JC_C100025155	Pentatricopeptide repeat
			JC_C100009187	Tetratricopeptide region IPR013105; Tetratricopeptide TPR2 IPR019734; Tetratricopeptide repeat
			JC_C100006122	Metallophosphoesterase IPR006186; Serine/threonine-specific protein phosphatase/bis(5-nucleosyl)-tetraphosphatase
			JC_C100008023	Pathogenesis-related transcriptional factor/ERF, DNA-binding IPR016177; DNA-binding, integrase-type
			JC_C100011715	Got1-like protein
			JC_C100021650	rRNA small subunit methyltransferase G
			JC_C100022102	UDP-glucuronosyl/UDP-glucosyltransferase
			JC_C100027149	-
			JC_C100027221	Pectinesterase, catalytic IPR006501; Pectinesterase inhibitor IPR011050; Pectin lyase fold/virulence factor
			JC_C100012588	Pentatricopeptide repeat
			JC_C100002400	Armadillo IPR016024; Armadillo-type fold
			JC_C100006671	Zinc finger, RING-type IPR018957; Zinc finger, C3HC4 RING-type
			JC_C100016818	-
			JC_C100017454	Misato Segment II, myosin-like IPR019746; Tubulin/FtsZ, N-terminal
			JC_C100021458	Pentatricopeptide repeat
			JC_C100026177	Protein of unknown function DUF584
			JC_C100020496	SMAD/FHA domain
			JC_C100029354	Cyclin-like F-box IPR006527; F-box associated
			JC_C100025832	Pentatricopeptide repeat
			JC_C100032965	Calcium-binding EF-hand IPR018248; EF-Hand domain IPR018249; EF-HAND 2
			JC_C100012026	Rad21/Rec8 like protein, C-terminal IPR006910; Rad21/Rec8 like protein, N-terminal
			JC_C100032825	Pentatricopeptide repeat
			JC_C100011986	Pentatricopeptide repeat
			JC_C100012856	Glutaredoxin 2 IPR012336; Thioredoxin-like fold
			JC_C100021691	Pentatricopeptide repeat
			JC_C100035184	Protein kinase, catalytic domain IPR001611; Leucine-rich repeat IPR002290; Serine/threonine-protein kinase domain IPR003591; Leucine-rich repeat, typical subtype IPR011009; Protein kinase-like domain IPR013210; Leucine-rich repeat, N-terminal IPR017442; Serine/threonine-protein kinase-like domain IPR020635; Tyrosine-protein kinase, subgroup, catalytic domain
			JC_C100018634	-
			JC_C100004591	Haloacid dehalogenase-like hydrolase IPR008250; ATPase, P-type, ATPase-associated region IPR013200; HAD superfamily hydrolase-like, type 3
			JC_C100026518	Pentatricopeptide repeat
			JC_C100017138	Ribosomal protein Rsm22, bacterial-type
			JC_C100007775	GO:0043231//intracellular membrane-bounded organelle
			JC_C100014921	GO:0044464//cell part
			JC_C100016414	Short-chain dehydrogenase/reductase SDR IPR016040; NAD(P)-binding domain
			JC_C100027341	UDP-glucuronosyl/UDP-glucosyltransferase
			JC_C100002300	Zinc finger, RING-type IPR002867; Zinc finger, C6HC-type IPR006575; RWD IPR016135; Ubiquitin-conjugating enzyme/RWD-like IPR018957; Zinc finger, C3HC4 RING-type
			JC_C100016799	CemA
			JC_C100016959	Mitochondrial substrate carrier IPR018108; Mitochondrial substrate/solute carrier
			JC_C100019276	Protein of unknown function DUF2358
			JC_C100025381	Signal transduction response regulator, receiver region IPR009057; Homeodomain-like IPR011006; CheY-like IPR014778; Myb, DNA-binding IPR017930; Myb-type HTH DNA-binding domain
			JC_C100002169	-
			JC_C100016092	Pathogenesis-related transcriptional factor/ERF, DNA-binding IPR016177; DNA-binding, integrase-type
			JC_C100002659	Pentatricopeptide repeat
			JC_C100009844	Chlorophyll A-B binding protein
			JC_C100020080	Synaptojanin, N-terminal
			JC_C100001555	Transferase
			JC_C100004769	-
			JC_C100013609	Leucine-rich repeat IPR002182; NB-ARC IPR003591; Leucine-rich repeat, typical subtype
			JC_C100020812	-
			JC_C100025955	Protein of unknown function DUF299, phosphotransferase, predicted
			JC_C100028241	Cyclin-like F-box IPR005174; Protein of unknown function DUF295
			JC_C100002476	Zinc finger, Rad18-type putative IPR014883; VRR-NUC IPR014905; HIP116, Rad5p N-terminal
			JC_C100014976	Pentatricopeptide repeat
			JC_C100025274	Peptidase S54, rhomboid
			JC_C100010874	Auxin responsive SAUR protein
			JC_C100013186	Pentatricopeptide repeat
			JC_C100006268	DNA recombination and repair protein Rad51, C-terminal IPR020588; DNA recombination/repair protein RecA/RadB, ATP-binding domain
			JC_C100011613	Pentatricopeptide repeat
			JC_C100011648	Clp, N-terminal
			JC_C100019297	Photosystem II protein PsbW, class 2
			JC_C100019753	Phospholipid/glycerol acyltransferase
			JC_C100033547	Pentatricopeptide repeat
			JC_C100018564	Magnesium-protoporphyrin IX methyltransferase, C-terminal
			JC_C100004818	Protein of unknown function DUF842, eukaryotic
			JC_C100021194	Cystathionine beta-synthase, core IPR001807; Chloride channel, voltage gated IPR014743; Chloride channel, core
			JC_C100019685	Protein kinase, catalytic domain IPR000858; S-locus glycoprotein IPR001480; Curculin-like (mannose-binding) lectin IPR002290; Serine/threonine-protein kinase domain IPR003609; Apple-like IPR011009; Protein kinase-like domain IPR013227; PAN-2 domain IPR017442; Serine/threonine-protein kinase-like domain IPR020635; Tyrosine-protein kinase, subgroup, catalytic domain
			JC_C100003228	Diacylglycerol kinase accessory region IPR001206; Diacylglycerol kinase, catalytic region IPR002182; NB-ARC
			JC_C100019740	Aminotransferase-like, plant mobile domain
			JC_C100022634	Pentatricopeptide repeat
			JC_C100000542	Argonaute/Dicer protein, PAZ IPR003165; Stem cell self-renewal protein Piwi IPR012337; Polynucleotidyl transferase, ribonuclease H fold IPR014811; Domain of unknown function DUF1785
			JC_C100005581	Leucine-rich repeat IPR002182; NB-ARC
			JC_C100022108	-
			JC_C100014269	Origin recognition complex, subunit 3, N-terminal
			JC_C100022078	Pentatricopeptide repeat
			JC_C100022130	Mitochondrial substrate carrier IPR018108; Mitochondrial substrate/solute carrier
			JC_C100025559	RNA-dependent RNA polymerase, eukaryotic-type
			JC_C100026729	Heat shock factor (HSF)-type, DNA-binding
			JC_C100002572	Major intrinsic protein
			JC_C100004359	Like-Sm ribonucleoprotein, core IPR006649; Like-Sm ribonucleoprotein, core domain, eukaryotic/archaea-type IPR010920; Like-Sm ribonucleoprotein-related, core
			JC_C100012535	Pentatricopeptide repeat
			JC_C100009055	Lipid-binding serum glycoprotein, C-terminal IPR017942; Lipid-binding serum glycoprotein, N-terminal IPR017943; Bactericidal permeability-increasing protein, alpha/beta domain
			JC_C100017193	CHCH
			JC_C100024386	Transcriptional factor B3
			JC_C100011236	Protein of unknown function DUF1645
			JC_C100000814	Mitochodrial transcription termination factor-related
			JC_C100021892	Protein kinase, catalytic domain IPR001611; Leucine-rich repeat IPR002290; Serine/threonine-protein kinase domain IPR011009; Protein kinase-like domain IPR017442; Serine/threonine-protein kinase-like domain IPR020635; Tyrosine-protein kinase, subgroup, catalytic domain
			JC_C100015153	UBX IPR006567; PUG domain IPR007087; Zinc finger, C2H2-type IPR018997; PUB domain
			JC_C100018229	Octicosapeptide/Phox/Bem1p IPR000644; Cystathionine beta-synthase, core
			JC_C100005007	Pentatricopeptide repeat
			JC_C100022654	Carbohydrate/purine kinase
			JC_C100009493	GO:0016020//membrane
			JC_C100010603	-
			JC_C100018824	Cation/H+ exchanger
			JC_C100020019	Cytochrome P450
			JC_C100006259	ATPase, AAA+ type, core IPR003959; ATPase, AAA-type, core
			JC_C100010120	Uncharacterised protein family UPF0005
			JC_C100015904	Multi antimicrobial extrusion protein MatE
			JC_C100020024	Pentatricopeptide repeat
			JC_C100023762	DNA-binding WRKY
			JC_C100012375	ABC transporter-like IPR003593; ATPase, AAA+ type, core IPR013525; ABC-2 type transporter
			JC_C100025852	Glycosyl transferase, family 20 IPR003337; Trehalose-phosphatase
			JC_C100010863	-
			JC_C100004625	Replication factor A protein 3 IPR016027; Nucleic acid-binding, OB-fold-like
			JC_C100010674	Cyclin-like F-box IPR005174; Protein of unknown function DUF295
			JC_C100020354	-
			JC_C100008969	Protein of unknown function DUF861, cupin-3 IPR011051; Cupin, RmlC-type
			JC_C100016904	Cation/H+ exchanger
			JC_C100020078	Lipase, GDSL
			JC_C100011459	Protein of unknown function DUF502
			JC_C100022947	Protein kinase, catalytic domain IPR001611; Leucine-rich repeat IPR002290; Serine/threonine-protein kinase domain IPR003591; Leucine-rich repeat, typical subtype IPR011009; Protein kinase-like domain IPR013210; Leucine-rich repeat, N-terminal IPR017442; Serine/threonine-protein kinase-like domain IPR020635; Tyrosine-protein kinase, subgroup, catalytic domain
			JC_C100023338	Glutathione S-transferase, C-terminal IPR010987; Glutathione S-transferase, C-terminal-like IPR012336; Thioredoxin-like fold IPR017933; Glutathione S-transferase/chloride channel, C-terminal
			JC_C100016568	Pseudouridine synthase I, TruA, alpha/beta domain IPR020103; Pseudouridine synthase, catalytic domain
			JC_C100017101	Zinc finger, RING-CH-type IPR018957; Zinc finger, C3HC4 RING-type
			JC_C100015113	ATPase, AAA+ type, core IPR006083; Phosphoribulokinase/uridine kinase
			JC_C100015684	Pentatricopeptide repeat
			JC_C100021129	Pentatricopeptide repeat
			JC_C100012705	Cyclin-like F-box
			JC_C100003611	GRAS transcription factor
			JC_C100005270	Cyclin-like F-box
			JC_C100005207	-
			JC_C100022731	Carbonic anhydrase
			JC_C100000888	Tryptophan/tyrosine permease
			JC_C100023481	Aldo/keto reductase
			JC_C100013827	Protein of unknown function Met10
			JC_C100016058	Biopterin transport-related protein BT1 IPR016196; Major facilitator superfamily, general substrate transporter
			JC_C100025990	Leucine-rich repeat
			JC_C100010925	Exodeoxyribonuclease III xth IPR005135; Endonuclease/exonuclease/phosphatase IPR010666; Zinc finger, GRF-type
			JC_C100013487	Helicase-like, DEXD box c2 type IPR006555; Helicase, ATP-dependent, c2 type IPR010614; DEAD2 IPR014001; DEAD-like helicase, N-terminal IPR014013; Helicase, superfamily 1/2, ATP-binding domain, DinG/Rad3-type
			JC_C100006586	AMP-dependent synthetase/ligase
			JC_C100020584	2-nitropropane dioxygenase, NPD
			JC_C100011171	Heat shock protein DnaJ, N-terminal
			JC_C100018624	-
			JC_C100005303	PRP38
			JC_C100003599	Cytochrome b6-f complex Fe-S subunit IPR017941; Rieske [2Fe-2S] iron-sulphur domain
			JC_C100019642	Protein of unknown function DUF185
			JC_C100026624	Pentatricopeptide repeat
			JC_C100024191	GO:0009536//plastid
			JC_C100015340	Zinc finger, RanBP2-type
			JC_C100015949	Amino acid-binding ACT
			JC_C100015613	Peptidyl-prolyl cis-trans isomerase, cyclophilin-type IPR015891; Cyclophilin-like
			JC_C100025038	-
			JC_C100008140	Alpha/beta hydrolase fold-1
			JC_C100022331	Zinc finger, RING-type IPR018957; Zinc finger, C3HC4 RING-type
			JC_C100018582	Polynucleotide adenylyltransferase region
			JC_C100023142	Exostosin-like
			JC_C100011588	RNA recognition motif, RNP-1 IPR001878; Zinc finger, CCHC-type
			JC_C100014241	Protein of unknown function DUF537
			JC_C100006624	RNA-processing protein, HAT helix IPR013026; Tetratricopeptide region
			JC_C100008983	-
			JC_C100033045	U box domain IPR016024; Armadillo-type fold
			JC_C100016041	Zinc finger, RING-type IPR002867; Zinc finger, C6HC-type
			JC_C100006276	Glycoside hydrolase, family 16 IPR008985; Concanavalin A-like lectin/glucanase IPR010713; Xyloglucan endo-transglycosylase, C-terminal
			JC_C100000825	-
			JC_C100025384	Protein of unknown function DUF868, plant
			JC_C100005854	Translation elongation factor EFG/EF2, C-terminal IPR000795; Protein synthesis factor, GTP-binding IPR004161; Translation elongation factor EFTu/EF1A, domain 2 IPR005517; Translation elongation factor EFG/EF2, domain IV IPR009000; Translation elongation/initiation factor/Ribosomal, beta-barrel IPR009022; Elongation factor G/III/V IPR020568; Ribosomal protein S5 domain 2-type fold
			JC_C100013697	Homeobox IPR002913; Lipid-binding START IPR009057; Homeodomain-like
			JC_C100013106	Mitochodrial transcription termination factor-related
			JC_C100022670	Protein of unknown function DUF1692
			JC_C100001267	Cytochrome P450
			JC_C100017153	Cellulose synthase
			JC_C100024911	Heat shock factor (HSF)-type, DNA-binding
			JC_C100002264	Pentatricopeptide repeat
			JC_C100010142	Ribosomal protein L15
			JC_C100015164	Cellular retinaldehyde-binding/triple function, C-terminal IPR011074; Phosphatidylinositol transfer protein-like, N-terminal
			JC_C100016682	Protein of unknown function DUF506, plant
			JC_C100022763	Galactose-binding like IPR010325; Rhamnogalacturonate lyase IPR013784; Carbohydrate-binding-like fold
			JC_C100003962	Transmembrane receptor, eukaryota
			JC_C100018175	Unidentified protein family UPF0406
			JC_C100021897	Cytochrome P450
			JC_C100028463	ATPase, AAA+ type, core IPR003959; ATPase, AAA-type, core
			JC_C100003211	Pentatricopeptide repeat
			JC_C100023977	Zinc finger, RING-type IPR011016; Zinc finger, RING-CH-type IPR018957; Zinc finger, C3HC4 RING-type
			JC_C100025426	Pentatricopeptide repeat
			JC_C100002750	Alpha/beta hydrolase fold-1
			JC_C100005791	Peptidase C12, ubiquitin carboxyl-terminal hydrolase 1
			JC_C100008146	-
			JC_C100011780	Glycoside hydrolase, family 3, N-terminal IPR002083; MATH IPR002772; Glycoside hydrolase, family 3, C-terminal IPR008974; TRAF-like IPR017853; Glycoside hydrolase, catalytic core
			JC_C100012453	GO:0044464//cell part
			JC_C100014954	Leucine-rich repeat IPR003591; Leucine-rich repeat, typical subtype IPR013210; Leucine-rich repeat, N-terminal
			JC_C100016868	GO:0009534//chloroplast thylakoid
			JC_C100017883	Transcription factor, MADS-box IPR002487; Transcription factor, K-box
			JC_C100005574	Protein kinase, catalytic domain IPR001611; Leucine-rich repeat IPR002290; Serine/threonine-protein kinase domain IPR003591; Leucine-rich repeat, typical subtype IPR011009; Protein kinase-like domain IPR013210; Leucine-rich repeat, N-terminal IPR017442; Serine/threonine-protein kinase-like domain IPR020635; Tyrosine-protein kinase, subgroup, catalytic domain
			JC_C100007365	Pentatricopeptide repeat
			JC_C100013520	Cytochrome C biogenesis protein CcmH
			JC_C100016051	Protein kinase, catalytic domain IPR001611; Leucine-rich repeat IPR002290; Serine/threonine-protein kinase domain IPR003591; Leucine-rich repeat, typical subtype IPR011009; Protein kinase-like domain IPR013210; Leucine-rich repeat, N-terminal IPR017442; Serine/threonine-protein kinase-like domain IPR020635; Tyrosine-protein kinase, subgroup, catalytic domain
			JC_C100023209	Protein of unknown function DUF538
			JC_C100029201	Zinc finger, RING-type IPR018957; Zinc finger, C3HC4 RING-type
			JC_C100030843	Pentatricopeptide repeat
			JC_C100005799	Pentatricopeptide repeat
			JC_C100006257	-
			JC_C100010854	Heat shock protein DnaJ, N-terminal
			JC_C100017974	Pentatricopeptide repeat
			JC_C100024338	-
			JC_C100004223	Transcription factor, SBP-box
			JC_C100004631	Chloroplast protein import component , Ti20-like
			JC_C100010213	-
			JC_C100015055	Oxoglutarate/iron-dependent oxygenase
			JC_C100023447	Leucine-rich repeat
			JC_C100026669	O-methyltransferase, family 2 IPR012967; Plant methyltransferase dimerisation
			JC_C100003068	Transketolase-like, pyrimidine-binding domain IPR005476; Transketolase, C-terminal IPR009014; Transketolase, C-terminal/Pyruvate-ferredoxin oxidoreductase, domain II
			JC_C100014705	Chlorophyllase
			JC_C100020358	Signal transduction response regulator, receiver region IPR011006; CheY-like
			JC_C100025090	D-galactoside/L-rhamnose binding SUEL lectin IPR008979; Galactose-binding like
			JC_C100026051	Protein kinase, catalytic domain IPR001220; Legume lectin, beta chain IPR002290; Serine/threonine-protein kinase domain IPR008985; Concanavalin A-like lectin/glucanase IPR011009; Protein kinase-like domain IPR017442; Serine/threonine-protein kinase-like domain IPR020635; Tyrosine-protein kinase, subgroup, catalytic domain
			JC_C100003792	GO:0043231//intracellular membrane-bounded organelle
			JC_C100006194	Protein of unknown function DUF567
			JC_C100012752	-
			JC_C100014417	Biopterin transport-related protein BT1 IPR016196; Major facilitator superfamily, general substrate transporter
			JC_C100015198	Aldo/keto reductase
			JC_C100015847	Amino acid permease-associated region
			JC_C100025602	IQ calmodulin-binding region
			JC_C100026819	-
			JC_C100003158	Thioredoxin-like fold IPR013766; Thioredoxin domain IPR017936; Thioredoxin-like
			JC_C100005923	Hydroxymethylglutaryl-CoA reductase, class I/II, catalytic IPR009023; Hydroxymethylglutaryl-CoA reductase, class I/II, NAD/NADP-binding IPR009029; Hydroxymethylglutaryl-CoA reductase, class I/II, substrate-binding
			JC_C100012849	GRAS transcription factor
			JC_C100014814	GO:0009534//chloroplast thylakoid
			JC_C100019698	Major facilitator superfamily MFS-1 IPR016196; Major facilitator superfamily, general substrate transporter
			JC_C100023503	Abortive infection protein
			JC_C100004176	C2 calcium-dependent membrane targeting IPR008973; C2 calcium/lipid-binding region, CaLB IPR013583; Phosphoribosyltransferase C-terminal, plant IPR018029; C2 membrane targeting protein
			JC_C100006414	Protein kinase, catalytic domain IPR002290; Serine/threonine-protein kinase domain IPR011009; Protein kinase-like domain IPR017442; Serine/threonine-protein kinase-like domain IPR020635; Tyrosine-protein kinase, subgroup, catalytic domain
			JC_C100011529	Protein of unknown function DUF702
			JC_C100019765	DNA mismatch repair protein MutS, C-terminal IPR007696; DNA mismatch repair protein MutS, core
			JC_C100014695	DNA/RNA helicase, C-terminal IPR014021; Helicase, superfamily 1/2, ATP-binding domain
			JC_C100024069	Pentatricopeptide repeat
			JC_C100004680	-
			JC_C100009103	Haem peroxidase, plant/fungal/bacterial IPR010255; Haem peroxidase
			JC_C100013134	Protein of unknown function DUF971
			JC_C100015246	-
			JC_C100023520	Alpha/beta hydrolase fold-3
			JC_C100027523	-
			JC_C100032489	Ovarian tumour, otubain IPR015940; Ubiquitin-associated/translation elongation factor EF1B, N-terminal, eukaryote
			JC_C100001275	Mechanosensitive ion channel MscS IPR010920; Like-Sm ribonucleoprotein-related, core
			JC_C100012587	Pentatricopeptide repeat
			JC_C100013629	Mitochodrial transcription termination factor-related
			JC_C100015771	Protein kinase, catalytic domain IPR002290; Serine/threonine-protein kinase domain IPR011009; Protein kinase-like domain IPR017442; Serine/threonine-protein kinase-like domain IPR020635; Tyrosine-protein kinase, subgroup, catalytic domain
			JC_C100018692	Uncharacterised protein family UPF0057
			JC_C100021524	Adenylate kinase
			JC_C100022100	UDP-glucuronosyl/UDP-glucosyltransferase
			JC_C100023537	Acid phosphatase/vanadium-dependent haloperoxidase related
			JC_C100026347	Homocysteine S-methyltransferase
			JC_C100002763	-
			JC_C100017766	DNA-binding WRKY IPR018872; Transcription factor, WRKY, Zn-cluster
			JC_C100018044	Heavy metal transport/detoxification protein
			JC_C100019341	Pentatricopeptide repeat
			JC_C100019734	Ras small GTPase, Rho type IPR003579; Ras small GTPase, Rab type IPR013684; MIRO-like
			JC_C100023518	GO:0009526//plastid envelope
			JC_C100008132	Glutamine amidotransferase type 1
			JC_C100010052	Pathogenesis-related transcriptional factor/ERF, DNA-binding IPR003340; Transcriptional factor B3 IPR016177; DNA-binding, integrase-type
			JC_C100032478	Pentatricopeptide repeat
			JC_C100015370	Zinc finger, B-box IPR006734; Protein of unknown function DUF597
			JC_C100023205	KRR1 interacting protein 1, subgroup
			JC_C100025646	Proteasome, alpha-subunit, conserved site IPR001353; Proteasome, subunit alpha/beta
			JC_C100004255	Pentatricopeptide repeat
			JC_C100005335	Cyclin-like F-box
			JC_C100007822	Pentatricopeptide repeat
			JC_C100025717	Cytochrome P450
			JC_C100014615	Ribonucleotide reductase IPR009078; Ferritin/ribonucleotide reductase-like
			JC_C100022070	Xyloglucan fucosyltransferase
			JC_C100030536	-
			JC_C100002511	ATPase, AAA+ type, core IPR013765; DNA recombination and repair protein RecA IPR020587; DNA recombination/repair protein RecA, monomer-monomer interface IPR020588; DNA recombination/repair protein RecA/RadB, ATP-binding domain
			JC_C100008479	Pentatricopeptide repeat
			JC_C100006081	Leucine-rich repeat IPR003591; Leucine-rich repeat, typical subtype
			JC_C100012839	SET IPR002893; Zinc finger, MYND-type
			JC_C100014552	Ankyrin repeat IPR020683; Ankyrin repeat-containing domain
			JC_C100002020	Rhodanese-like
			JC_C100006959	-
			JC_C100025874	Mediator complex, subunit Med11
			JC_C100001280	GO:0044464//cell part
			JC_C100007680	Pentatricopeptide repeat
			JC_C100024185	Heat shock protein DnaJ, cysteine-rich region
			JC_C100028429	Pentatricopeptide repeat
			JC_C100013867	Zinc finger, CCCH-type
			JC_C100014975	Chalcone/stilbene synthase, C-terminal IPR013601; FAE1/Type III polyketide synthase-like protein IPR016039; Thiolase-like
			JC_C100019827	Cytochrome P450
			JC_C100005990	Strictosidine synthase, conserved region
			JC_C100034306	Alpha/beta hydrolase fold-1
			JC_C100004130	Protein kinase, catalytic domain IPR001245; Tyrosine-protein kinase, catalytic domain IPR001611; Leucine-rich repeat IPR002290; Serine/threonine-protein kinase domain IPR003591; Leucine-rich repeat, typical subtype IPR011009; Protein kinase-like domain IPR020635; Tyrosine-protein kinase, subgroup, catalytic domain
			JC_C100015382	Cytochrome b561, eukaryote IPR006593; Cytochrome b561/ferric reductase transmembrane
			JC_C100010931	Oxidoreductase FAD/NAD(P)-binding IPR017927; Ferredoxin reductase-type FAD-binding domain IPR017938; Riboflavin synthase-like beta-barrel
			JC_C100033543	Cation efflux protein
			JC_C100014548	-
			JC_C100021024	Protein kinase, catalytic domain IPR002290; Serine/threonine-protein kinase domain IPR011009; Protein kinase-like domain IPR017442; Serine/threonine-protein kinase-like domain IPR020635; Tyrosine-protein kinase, subgroup, catalytic domain
			JC_C100009340	Zinc finger, C2H2-type IPR015880; Zinc finger, C2H2-like
			JC_C100023875	-
			JC_C100028187	Glutaredoxin IPR012336; Thioredoxin-like fold
			JC_C100002662	Pentatricopeptide repeat
			JC_C100017775	Protein kinase, catalytic domain IPR001611; Leucine-rich repeat IPR002290; Serine/threonine-protein kinase domain IPR011009; Protein kinase-like domain IPR013210; Leucine-rich repeat, N-terminal IPR017442; Serine/threonine-protein kinase-like domain IPR020635; Tyrosine-protein kinase, subgroup, catalytic domain
			JC_C100024283	Pentatricopeptide repeat
			JC_C100032579	GO:0031410//cytoplasmic vesicle
			JC_C100000601	No apical meristem (NAM) protein
			JC_C100016137	Ubiquitin supergroup
			JC_C100025125	Pathogenesis-related transcriptional factor/ERF, DNA-binding IPR016177; DNA-binding, integrase-type
			JC_C100024348	-
			JC_C100003979	N2,N2-dimethylguanosine tRNA methyltransferase
			JC_C100020015	-
			JC_C100021225	BTB/POZ-like
			JC_C100008201	-
			JC_C100025114	Protein of unknown function DUF547
			JC_C100018643	-
			JC_C100026454	Protein of unknown function DUF246, plant
			JC_C100032346	Pentatricopeptide repeat
			JC_C100019683	Protein kinase, catalytic domain IPR000858; S-locus glycoprotein IPR001480; Curculin-like (mannose-binding) lectin IPR002290; Serine/threonine-protein kinase domain IPR003609; Apple-like IPR011009; Protein kinase-like domain IPR013227; PAN-2 domain IPR017442; Serine/threonine-protein kinase-like domain IPR020635; Tyrosine-protein kinase, subgroup, catalytic domain
			JC_C100008480	Plus-3
			JC_C100004417	GO:0043231//intracellular membrane-bounded organelle
			JC_C100023829	Cupin 1 IPR011051; Cupin, RmlC-type
			JC_C100004598	Short-chain dehydrogenase/reductase SDR IPR016040; NAD(P)-binding domain
			JC_C100019879	RecF/RecN/SMC protein, N-terminal IPR007517; Rad50 zinc hook
			JC_C100019161	Zinc finger, C2H2-type IPR015880; Zinc finger, C2H2-like
			JC_C100003756	Peptidase S10, serine carboxypeptidase
			JC_C100009640	Zinc finger, RING-type IPR018957; Zinc finger, C3HC4 RING-type
			JC_C100025949	Pseudouridine synthase, RsuA and RluB/C/D/E/F IPR020103; Pseudouridine synthase, catalytic domain
			JC_C100017191	Prefoldin IPR010989; t-SNARE IPR011684; KIP1-like
			JC_C100030891	UDP-glucuronosyl/UDP-glucosyltransferase
			JC_C100016232	DNA-binding WRKY
			JC_C100001379	Aldo/keto reductase
			JC_C100012772	Peptidase S10, serine carboxypeptidase
			JC_C100023932	-
			JC_C100005744	Peptidase M41 IPR003593; ATPase, AAA+ type, core IPR003959; ATPase, AAA-type, core
			JC_C100020665	Oxoglutarate/iron-dependent oxygenase
			JC_C100002636	Mur ligase, C-terminal IPR013221; Mur ligase, central
			JC_C100023873	Homeobox IPR003106; Leucine zipper, homeobox-associated IPR009057; Homeodomain-like
			JC_C100007932	Pathogenesis-related transcriptional factor/ERF, DNA-binding IPR016177; DNA-binding, integrase-type
			JC_C100015639	Glycosyl transferase, family 8
			JC_C100025724	-
			JC_C100018163	Phosphofructokinase
			JC_C100020581	Peptidase S10, serine carboxypeptidase
			JC_C100009655	Transferase
			JC_C100016352	Short-chain dehydrogenase/reductase SDR IPR016040; NAD(P)-binding domain
			JC_C100011319	NmrA-like IPR016040; NAD(P)-binding domain
			JC_C100025977	GO:0044464//cell part
			JC_C100003790	-
			JC_C100016822	Mediator complex, subunit Med10
			JC_C100020842	Amino acid transporter, transmembrane
			JC_C100014348	Glycoside hydrolase, family 3, N-terminal IPR002772; Glycoside hydrolase, family 3, C-terminal IPR017853; Glycoside hydrolase, catalytic core
			JC_C100020907	-
			JC_C100026120	Cyclin-like IPR013137; Zinc finger, TFIIB-type
			JC_C100020382	Alpha/beta hydrolase fold-3
			JC_C100019314	Pentatricopeptide repeat
			JC_C100019908	Protein of unknown function DUF593
			JC_C100005810	Glycoside hydrolase, family 1 IPR017853; Glycoside hydrolase, catalytic core
			JC_C100001114	3-oxo-5-alpha-steroid 4-dehydrogenase, C-terminal
			JC_C100019159	Photosystem II oxygen evolving complex protein PsbP IPR016124; Mog1/PsbP/DUF1795, alpha/beta/alpha sandwich
			JC_C100014426	NPH3
			JC_C100008724	Protein kinase, catalytic domain IPR002290; Serine/threonine-protein kinase domain IPR011009; Protein kinase-like domain IPR017442; Serine/threonine-protein kinase-like domain IPR020635; Tyrosine-protein kinase, subgroup, catalytic domain
			JC_C100024414	Chalcone/stilbene synthase, C-terminal IPR013601; FAE1/Type III polyketide synthase-like protein IPR016039; Thiolase-like
			JC_C100006103	Shikimate kinase
			JC_C100008740	Remorin, C-terminal
			JC_C100017282	Protein kinase, catalytic domain IPR001245; Tyrosine-protein kinase, catalytic domain IPR002290; Serine/threonine-protein kinase domain IPR011009; Protein kinase-like domain IPR020635; Tyrosine-protein kinase, subgroup, catalytic domain
			JC_C100028144	-
			JC_C100002697	Photosystem I PsaG/PsaK protein
			JC_C100010759	Mog1/PsbP/DUF1795, alpha/beta/alpha sandwich
			JC_C100032746	Peptidase A1 IPR009007; Peptidase aspartic, catalytic
			JC_C100033373	Pentatricopeptide repeat
			JC_C100012141	Peptidase A1 IPR009007; Peptidase aspartic, catalytic
			JC_C100008817	Protein of unknown function DUF642 IPR008979; Galactose-binding like
			JC_C100000500	WRC IPR014978; Glutamine-Leucine-Glutamine, QLQ
			JC_C100000599	Peptidase A1 IPR009007; Peptidase aspartic, catalytic
			JC_C100001164	Thaumatin, pathogenesis-related
			JC_C100025251	AUX/IAA protein IPR011525; Aux/IAA-ARF-dimerisation
			JC_C100006709	Glycoside hydrolase, family 3, C-terminal IPR017853; Glycoside hydrolase, catalytic core
			JC_C100011856	Protein Transporter, Pam16
			JC_C100022445	Peptidase S10, serine carboxypeptidase
			JC_C100033598	Late embryogenesis abundant protein 18
			JC_C100033729	GO:0043231//intracellular membrane-bounded organelle
			JC_C100017294	Pathogenesis-related transcriptional factor/ERF, DNA-binding IPR016177; DNA-binding, integrase-type
			JC_C100001945	Pentatricopeptide repeat
			JC_C100019438	Domain of unknown function DUF1995
			JC_C100014127	Pentatricopeptide repeat
			JC_C100023607	IQ calmodulin-binding region IPR003103; Apoptosis regulator, Bcl-2 protein, BAG
			JC_C100026557	Calcium-binding EF-hand IPR013027; FAD-dependent pyridine nucleotide-disulphide oxidoreductase IPR018248; EF-Hand domain IPR018249; EF-HAND 2
			JC_C100001009	Mog1/PsbP/DUF1795, alpha/beta/alpha sandwich
			JC_C100026807	Aldo/keto reductase
			JC_C100000826	GO:0009521;GO:0009536//plastid
			JC_C100017912	Pentatricopeptide repeat
			JC_C100025722	Heat shock protein DnaJ, N-terminal
			JC_C100023703	ABC transporter, transmembrane region IPR003439; ABC transporter-like IPR003593; ATPase, AAA+ type, core IPR011527; ABC transporter, transmembrane region, type 1 IPR017940; ABC transporter integral membrane type 1
			JC_C100024171	-
			JC_C100028815	-
			JC_C100023045	-
			JC_C100015205	Homeodomain-like IPR014778; Myb, DNA-binding IPR017930; Myb-type HTH DNA-binding domain
			JC_C100032243	-
			JC_C100031219	GO:0031410//cytoplasmic vesicle
			JC_C100007766	Pentatricopeptide repeat
			JC_C100031934	Protein of unknown function DUF247, plant
			JC_C100006156	Transcriptional factor B3 IPR011124; Zinc finger, CW-type
			JC_C100025654	Pathogenesis-related transcriptional factor/ERF, DNA-binding IPR016177; DNA-binding, integrase-type
			JC_C100020556	ABC transporter-like IPR003593; ATPase, AAA+ type, core IPR013525; ABC-2 type transporter
			JC_C100012964	Oxidoreductase, molybdopterin binding IPR001199; Cytochrome b5 IPR001433; Oxidoreductase FAD/NAD(P)-binding IPR005066; Moybdenum cofactor oxidoreductase, dimerisation IPR008333; Oxidoreductase FAD-binding region IPR014756; Immunoglobulin E-set IPR017927; Ferredoxin reductase-type FAD-binding domain IPR017938; Riboflavin synthase-like beta-barrel
			JC_C100014224	Peptidase C19, ubiquitin carboxyl-terminal hydrolase 2
			JC_C100000035	Mitochondrial glycoprotein
			JC_C100003669	Leucine-rich repeat IPR003591; Leucine-rich repeat, typical subtype IPR013210; Leucine-rich repeat, N-terminal
			JC_C100025197	Protein of unknown function DUF1230
			JC_C100026622	-
			JC_C100004469	-
			JC_C100017428	Protein of unknown function DUF547
			JC_C100018306	Mitochondrial substrate carrier IPR018108; Mitochondrial substrate/solute carrier
			JC_C100022459	-
			JC_C100011023	U box domain IPR016024; Armadillo-type fold
			JC_C100017447	GO:0043231//intracellular membrane-bounded organelle
			JC_C100000498	Protein kinase, catalytic domain IPR001611; Leucine-rich repeat IPR002290; Serine/threonine-protein kinase domain IPR003591; Leucine-rich repeat, typical subtype IPR011009; Protein kinase-like domain IPR013210; Leucine-rich repeat, N-terminal IPR017442; Serine/threonine-protein kinase-like domain IPR020635; Tyrosine-protein kinase, subgroup, catalytic domain
			JC_C100002883	Protein of unknown function DUF2040, coiled-coil
			JC_C100016324	Zinc/iron permease
			JC_C100001077	GroES-like IPR013149; Alcohol dehydrogenase, zinc-binding IPR016040; NAD(P)-binding domain IPR020843; Polyketide synthase, enoylreductase
			JC_C100011098	Auxin efflux carrier
			JC_C100011373	Protein of unknown function DUF594
			JC_C100022064	Chlorophyll A-B binding protein
			JC_C100026269	Zinc finger, MYND-type
			JC_C100006356	DNA/RNA helicase, C-terminal IPR002121; Helicase/RNase D C-terminal, HRDC domain IPR011545; DNA/RNA helicase, DEAD/DEAH box type, N-terminal IPR014001; DEAD-like helicase, N-terminal IPR014021; Helicase, superfamily 1/2, ATP-binding domain IPR018982; RQC domain
			JC_C100004167	GO:0030312//external encapsulating structure
			JC_C100004716	Exonuclease IPR013520; Exonuclease, RNase T/DNA polymerase III
			JC_C100016991	DNA/RNA helicase, C-terminal IPR011545; DNA/RNA helicase, DEAD/DEAH box type, N-terminal IPR014001; DEAD-like helicase, N-terminal IPR014014; RNA helicase, DEAD-box type, Q motif IPR014021; Helicase, superfamily 1/2, ATP-binding domain
			JC_C100001356	Zinc finger, B-box IPR006734; Protein of unknown function DUF597
			JC_C100012184	HECT IPR016024; Armadillo-type fold
			JC_C100002979	-
			JC_C100014163	Heat shock protein DnaJ, N-terminal
			JC_C100014960	Aldo/keto reductase
			JC_C100008719	Pentatricopeptide repeat
			JC_C100022341	GO:0031410//cytoplasmic vesicle
			JC_C100009623	GO:0044464//cell part
			JC_C100012044	GO:0043231//intracellular membrane-bounded organelle
			JC_C100005534	Protein of unknown function DUF794, plant
			JC_C100012520	ATPase, AAA+ type, core IPR003959; ATPase, AAA-type, core
			JC_C100020438	Nucleoside diphosphate kinase, core
			JC_C100028081	Pentatricopeptide repeat
			JC_C100009193	ATPase, AFG1-like
			JC_C100025116	Cyclin-like F-box IPR011043; Galactose oxidase/kelch, beta-propeller
			JC_C100007339	Cytochrome P450
			JC_C100017423	Protein kinase, catalytic domain IPR002290; Serine/threonine-protein kinase domain IPR002482; Peptidoglycan-binding Lysin subgroup IPR011009; Protein kinase-like domain IPR017442; Serine/threonine-protein kinase-like domain IPR018392; Peptidoglycan-binding lysin domain IPR020635; Tyrosine-protein kinase, subgroup, catalytic domain
			JC_C100022236	Cobalamin (vitamin B12) biosynthesis CobW-like IPR011629; Cobalamin (vitamin B12) biosynthesis CobW-like, C-terminal
			JC_C100026138	HCNGP-like
			JC_C100013117	SET IPR015353; Rubisco LSMT substrate-binding
			JC_C100017916	-
			JC_C100006338	Zinc finger, BED-type predicted IPR008906; HAT dimerisation
			JC_C100007402	Endonuclease/exonuclease/phosphatase
			JC_C100007823	SPX, N-terminal IPR004342; EXS, C-terminal
			JC_C100025178	Mitochondrial substrate carrier IPR018108; Mitochondrial substrate/solute carrier
			JC_C100000386	Carbohydrate kinase, FGGY, N-terminal IPR018485; Carbohydrate kinase, FGGY, C-terminal
			JC_C100019518	Alanine racemase, N-terminal
			JC_C100021064	mRNA capping enzyme, large subunit
			JC_C100006054	Polynucleotide adenylyltransferase region
			JC_C100003872	Homeobox IPR009057; Homeodomain-like
			JC_C100010545	Pentatricopeptide repeat
			JC_C100014299	NB-ARC
			JC_C100033769	Pentatricopeptide repeat
			JC_C100021003	DVL
			JC_C100013337	Leucine-rich repeat, cysteine-containing subtype
			JC_C100015133	Protein of unknown function DUF593
			JC_C100003174	Pentatricopeptide repeat
			JC_C100019191	Amidase
			JC_C100001278	Cellular retinaldehyde-binding/triple function, C-terminal IPR008273; Cellular retinaldehyde-binding/triple function, N-terminal IPR011074; Phosphatidylinositol transfer protein-like, N-terminal
			JC_C100005622	-
			JC_C100015081	Mitochodrial transcription termination factor-related
			JC_C100019810	RNA recognition motif, RNP-1
			JC_C100008605	Alpha/beta hydrolase fold-1
			JC_C100019059	Pentatricopeptide repeat
			JC_C100024694	SNF2-related IPR001650; DNA/RNA helicase, C-terminal
			JC_C100013225	Mitochodrial transcription termination factor-related
			JC_C100007926	Multihaem cytochrome
			JC_C100012914	Calcium-binding EF-hand IPR018248; EF-Hand domain IPR018249; EF-HAND 2
			JC_C100023100	RNA recognition motif, RNP-1 IPR007201; RNA recognition motif 2
			JC_C100006072	Protein kinase, catalytic domain IPR002290; Serine/threonine-protein kinase domain IPR004292; Adenoviral 52K-like protein IPR006567; PUG domain IPR010513; KEN domain, ribonuclease activator IPR011009; Protein kinase-like domain IPR017442; Serine/threonine-protein kinase-like domain IPR018391; Pyrrolo-quinoline quinone beta-propeller repeat IPR020635; Tyrosine-protein kinase, subgroup, catalytic d…
			JC_C100022569	Homeodomain-like IPR014778; Myb, DNA-binding IPR017930; Myb-type HTH DNA-binding domain
			JC_C100033144	-
			JC_C100023746	Plant specific eukaryotic initiation factor 4B
			JC_C100000918	Pentatricopeptide repeat
			JC_C100012816	Phospholipid/glycerol acyltransferase
			JC_C100013276	ATPase-like, ParA/MinD
			JC_C100012395	DEAD-like helicase, N-terminal
			JC_C100019955	-
			JC_C100017301	-
			JC_C100023832	-
			JC_C100002078	Auxin efflux carrier
			JC_C100013696	Photosystem I reaction centre subunit VI
			JC_C100033416	-
			JC_C100011887	HEAT IPR001494; Importin-beta, N-terminal IPR016024; Armadillo-type fold
			JC_C100018178	Manganese/iron superoxide dismutase, N-terminal IPR019832; Manganese/iron superoxide dismutase, C-terminal
			JC_C100023636	Nucleotide-sugar transporter
			JC_C100010853	Oxidoreductase FAD/NAD(P)-binding IPR017927; Ferredoxin reductase-type FAD-binding domain IPR017938; Riboflavin synthase-like beta-barrel
			JC_C100003851	Basic-leucine zipper (bZIP) transcription factor IPR011700; Basic leucine zipper
			JC_C100014142	-
			JC_C100014444	Nodulin-like IPR016196; Major facilitator superfamily, general substrate transporter
			JC_C100026176	Peptidase S8/S53, subtilisin/kexin/sedolisin IPR003137; Protease-associated PA IPR010259; Proteinase inhibitor I9, subtilisin propeptide
			JC_C100016828	Transmembrane receptor, eukaryota
			JC_C100000210	Pyridoxal phosphate-dependent enzyme, beta subunit
			JC_C100010100	-
			JC_C100008503	Oligopeptide transporter IPR016196; Major facilitator superfamily, general substrate transporter
			JC_C100005896	tRNA isopentenyltransferase
			JC_C100008392	Protein of unknown function DUF6, transmembrane
			JC_C100016456	GO:0009534//chloroplast thylakoid
			JC_C100013814	CASC3/Barentsz eIF4AIII binding
			JC_C100014692	RNA polymerase II accessory factor, Cdc73
			JC_C100021438	DNA recombination/repair protein RecA/RadB, ATP-binding domain
			JC_C100023649	-
			JC_C100007729	Alpha/beta hydrolase fold-3
			JC_C100018273	Toll-Interleukin receptor IPR001611; Leucine-rich repeat IPR002182; NB-ARC IPR003591; Leucine-rich repeat, typical subtype IPR011713; Leucine-rich repeat 3
			JC_C100022632	No apical meristem (NAM) protein
			JC_C100026422	GH3 auxin-responsive promoter
			JC_C100007437	Pathogenesis-related transcriptional factor/ERF, DNA-binding IPR016177; DNA-binding, integrase-type
			JC_C100017530	Heat shock protein DnaJ, N-terminal
			JC_C100021152	IQ calmodulin-binding region IPR000595; Cyclic nucleotide-binding IPR018490; Cyclic nucleotide-binding-like
			JC_C100021246	Zinc finger, C2H2-type IPR015880; Zinc finger, C2H2-like
			JC_C100028994	Zinc finger, C2H2-type
			JC_C100004111	Reverse transcriptase, RNA-dependent DNA polymerase
			JC_C100005088	Poly(ADP-ribose) glycohydrolase
			JC_C100006563	GO:0043231//intracellular membrane-bounded organelle;GO:0044444//cytoplasmic part
			JC_C100015703	Cyclin, C-terminal IPR005735; Zinc finger, LSD1-type IPR006670; Cyclin IPR006671; Cyclin, N-terminal IPR011028; Cyclin-like
			JC_C100014755	Oxoglutarate/iron-dependent oxygenase
			JC_C100015742	Zinc finger, RING-CH-type IPR018957; Zinc finger, C3HC4 RING-type
			JC_C100016767	-
			JC_C100002539	Formiminotransferase IPR012886; Formiminotransferase, N-terminal
			JC_C100003129	-
			JC_C100009323	Pentatricopeptide repeat
			JC_C100010008	Regulatory protein RecX
			JC_C100012714	Toll-Interleukin receptor IPR001611; Leucine-rich repeat
			JC_C100016706	GO:0043234//protein complex;GO:0009526//plastid envelope;GO:0009534//chloroplast thylakoid
			JC_C100029137	-
			JC_C100035037	Leucine-rich repeat IPR002182; NB-ARC
			JC_C100003938	Pentatricopeptide repeat
			JC_C100009549	Methyltransferase-16, putative
			JC_C100012358	Major intrinsic protein
			JC_C100022900	-
			JC_C100014467	Pyridoxal phosphate-dependent enzyme, beta subunit
			JC_C100017345	Auxin responsive SAUR protein
			JC_C100025667	-
			JC_C100032520	Pentatricopeptide repeat
			JC_C100007986	-
			JC_C100008228	ThiJ/PfpI
			JC_C100029057	-
			JC_C100009131	RNA-dependent RNA polymerase, eukaryotic-type
			JC_C100001977	-
			JC_C100030172	SANT, DNA-binding IPR009057; Homeodomain-like IPR014778; Myb, DNA-binding IPR017930; Myb-type HTH DNA-binding domain
			JC_C100009713	Zinc finger, RING-type IPR008974; TRAF-like IPR013010; Zinc finger, SIAH-type IPR018121; Seven in absentia protein, TRAF-like domain
			JC_C100010055	Homeodomain-like IPR014778; Myb, DNA-binding IPR017930; Myb-type HTH DNA-binding domain
			JC_C100025402	Armadillo-type fold
			JC_C100016720	Transcriptional factor B3 IPR011124; Zinc finger, CW-type
			JC_C100033306	-
			JC_C100033503	-
			JC_C100006511	Aminotransferase, class V/Cysteine desulfurase IPR015424; Pyridoxal phosphate-dependent transferase, major region
			JC_C100000070	Protein kinase, catalytic domain IPR002290; Serine/threonine-protein kinase domain IPR011009; Protein kinase-like domain IPR017442; Serine/threonine-protein kinase-like domain IPR020635; Tyrosine-protein kinase, subgroup, catalytic domain
			JC_C100006024	Regulator of chromosome condensation, RCC1 IPR009091; Regulator of chromosome condensation/beta-lactamase-inhibitor protein II
			JC_C100020787	-
			JC_C100017340	Zinc finger, BED-type predicted IPR007021; Protein of unknown function DUF659 IPR008906; HAT dimerisation IPR011523; Protein of unknown function DUF1544
			JC_C100004228	Mitochodrial transcription termination factor-related
			JC_C100034512	-

## Sheet: Cluster 1
Cluster 1	N=2169 genes
	< return		Name	Description
			JC_C100015363	O-methyltransferase, family 3
			JC_C100026056	VQ
			JC_C100003051	-
			JC_C100014438	Peptidase A1 IPR009007; Peptidase aspartic, catalytic
			JC_C100011435	-
			JC_C100011576	Harpin-induced 1
			JC_C100015867	Oxidoreductase FAD/NAD(P)-binding IPR017927; Ferredoxin reductase-type FAD-binding domain IPR017938; Riboflavin synthase-like beta-barrel
			JC_C100031616	GO:0043234//protein complex;GO:0016020//membrane
			JC_C100006721	Mitochondrial substrate carrier IPR018108; Mitochondrial substrate/solute carrier
			JC_C100000043	Oligopeptide transporter OPT superfamily
			JC_C100021656	Signal transduction response regulator, receiver region IPR011006; CheY-like
			JC_C100009398	Glycoside hydrolase, family 28 IPR011050; Pectin lyase fold/virulence factor
			JC_C100023289	Protein of unknown function DUF1644
			JC_C100016816	Uncharacterised protein family UPF0136, Transmembrane
			JC_C100021460	-
			JC_C100010846	-
			JC_C100023898	-
			JC_C100011827	Protein kinase, catalytic domain IPR002290; Serine/threonine-protein kinase domain IPR011009; Protein kinase-like domain IPR017442; Serine/threonine-protein kinase-like domain IPR020635; Tyrosine-protein kinase, subgroup, catalytic domain
			JC_C100013386	VQ
			JC_C100004459	Zinc finger, C2H2-type
			JC_C100028174	-
			JC_C100013723	IQ calmodulin-binding region
			JC_C100015960	-
			JC_C100024660	Cyclin-like IPR013922; Cyclin-related 2
			JC_C100009486	-
			JC_C100011154	Pentatricopeptide repeat
			JC_C100001921	Zinc finger, AN1-type IPR002653; Zinc finger, A20-type
			JC_C100010151	Thioesterase superfamily
			JC_C100016176	Protein of unknown function DUF677
			JC_C100021324	Protein of unknown function DUF966
			JC_C100020509	Ribonuclease III
			JC_C100013018	Protein of unknown function DUF1997
			JC_C100013741	Thioredoxin-like fold IPR013740; Redoxin IPR017936; Thioredoxin-like
			JC_C100008771	Mitochondrial glycoprotein
			JC_C100007697	Mpv17/PMP22
			JC_C100002431	GO:0044444//cytoplasmic part;GO:0016020//membrane
			JC_C100010410	Poly(A) polymerase, RNA-binding region IPR007012; Poly(A) polymerase, central region IPR011068; Nucleotidyltransferase, class I, C-terminal-like
			JC_C100005886	Signal transduction histidine kinase, phosphotransfer (Hpt) region
			JC_C100017049	Protein of unknown function DUF2499
			JC_C100007963	Lactate/malate dehydrogenase IPR015955; Lactate dehydrogenase/glycoside hydrolase, family 4, C-terminal IPR016040; NAD(P)-binding domain
			JC_C100011046	Exostosin-like
			JC_C100015014	-
			JC_C100006964	Thymidine kinase
			JC_C100013763	Lipase, GDSL IPR013830; Esterase, SGNH hydrolase-type
			JC_C100014933	Protein of unknown function DUF581
			JC_C100026331	-
			JC_C100020735	Metallophosphoesterase IPR006186; Serine/threonine-specific protein phosphatase/bis(5-nucleosyl)-tetraphosphatase
			JC_C100014910	Haloacid dehalogenase-like hydrolase
			JC_C100020921	Protein of unknown function DUF1313
			JC_C100012730	Thioredoxin-like fold IPR013766; Thioredoxin domain
			JC_C100002738	AMP-dependent synthetase/ligase
			JC_C100022519	No apical meristem (NAM) protein
			JC_C100015188	Prolyl 4-hydroxylase, alpha subunit
			JC_C100005787	FAD linked oxidase, N-terminal IPR015345; Cytokinin dehydrogenase 1, FAD/cytokinin binding domain IPR016164; FAD-linked oxidase-like, C-terminal IPR016166; FAD-binding, type 2
			JC_C100023714	Sodium/calcium exchanger membrane region
			JC_C100026366	Photosystem I protein PsaD
			JC_C100026854	Cytochrome P450
			JC_C100033410	-
			JC_C100014541	-
			JC_C100019278	-
			JC_C100017032	Homeobox IPR005539; ELK IPR005540; KNOX1 IPR005541; KNOX2 IPR009057; Homeodomain-like
			JC_C100007203	DSBA oxidoreductase IPR012336; Thioredoxin-like fold
			JC_C100020783	GINS complex, Psf2 component
			JC_C100023739	Target SNARE coiled-coil region IPR006011; Syntaxin, N-terminal IPR010989; t-SNARE
			JC_C100004444	Pentatricopeptide repeat
			JC_C100024276	-
			JC_C100017164	Pentatricopeptide repeat
			JC_C100015038	-
			JC_C100011428	Calcium-binding EF-hand IPR018248; EF-Hand domain IPR018249; EF-HAND 2
			JC_C100000004	-
			JC_C100016031	Glycoside hydrolase, family 16 IPR008985; Concanavalin A-like lectin/glucanase IPR010713; Xyloglucan endo-transglycosylase, C-terminal
			JC_C100024867	-
			JC_C100029545	ATPase, AAA+ type, core IPR003959; ATPase, AAA-type, core
			JC_C100007757	Protein of unknown function DUF1997
			JC_C100026502	Pectinesterase, catalytic IPR006501; Pectinesterase inhibitor IPR011050; Pectin lyase fold/virulence factor
			JC_C100017268	C2 calcium-dependent membrane targeting IPR008973; C2 calcium/lipid-binding region, CaLB IPR018029; C2 membrane targeting protein
			JC_C100018311	Glycosyl transferase, family 31
			JC_C100025249	Aminoacyl-tRNA synthetase, class Ib
			JC_C100028516	Glyoxal oxidase, N-terminal IPR011043; Galactose oxidase/kelch, beta-propeller IPR014756; Immunoglobulin E-set IPR015202; Domain of unknown function DUF1929
			JC_C100004762	UDP-glucuronosyl/UDP-glucosyltransferase
			JC_C100016076	Methyladenine glycosylase IPR011257; DNA glycosylase
			JC_C100019672	-
			JC_C100006258	Methyltransferase type 11
			JC_C100012555	Pectate lyase/Amb allergen IPR011050; Pectin lyase fold/virulence factor
			JC_C100016296	Heavy metal transport/detoxification protein
			JC_C100017671	Transcriptional factor B3
			JC_C100021257	-
			JC_C100021172	Major intrinsic protein
			JC_C100020611	Plant self-incompatibility S1
			JC_C100004713	Class II aldolase/adducin, N-terminal
			JC_C100002947	WD40 repeat-like-containing domain
			JC_C100013747	Pentatricopeptide repeat
			JC_C100023856	O-methyltransferase, family 2 IPR012967; Plant methyltransferase dimerisation
			JC_C100012740	Amino acid permease-associated region
			JC_C100016068	Mg2+ transporter protein, CorA-like
			JC_C100000229	GDP-fucose protein O-fucosyltransferase
			JC_C100015702	-
			JC_C100008904	Mitochondrial substrate carrier IPR018108; Mitochondrial substrate/solute carrier
			JC_C100005350	Thymidine kinase
			JC_C100007239	Glycoside hydrolase, family 81
			JC_C100025952	Glycoside hydrolase, family 16 IPR008985; Concanavalin A-like lectin/glucanase IPR010713; Xyloglucan endo-transglycosylase, C-terminal
			JC_C100010947	Pectinesterase, catalytic IPR011050; Pectin lyase fold/virulence factor
			JC_C100015032	Cas1p-like
			JC_C100021936	UvrB/UvrC protein IPR007474; ApaG IPR009055; UvrB, C-terminal UvrC-binding
			JC_C100020362	NADPH-dependent FMN reductase
			JC_C100016046	GO:0043231//intracellular membrane-bounded organelle
			JC_C100009540	Fatty acid desaturase, type 1
			JC_C100001739	Protein of unknown function DUF829, transmembrane 53
			JC_C100004561	Protein kinase, catalytic domain IPR002290; Serine/threonine-protein kinase domain IPR011009; Protein kinase-like domain IPR017442; Serine/threonine-protein kinase-like domain IPR020635; Tyrosine-protein kinase, subgroup, catalytic domain
			JC_C100014980	AUX/IAA protein IPR011525; Aux/IAA-ARF-dimerisation
			JC_C100010768	Peptidyl-prolyl cis-trans isomerase, FKBP-type
			JC_C100016507	Peptidoglycan-binding Lysin subgroup IPR018392; Peptidoglycan-binding lysin domain
			JC_C100003807	Pentatricopeptide repeat
			JC_C100005080	tRNA-binding region IPR016027; Nucleic acid-binding, OB-fold-like
			JC_C100007230	ATPase, AAA+ type, core IPR003959; ATPase, AAA-type, core IPR011546; Peptidase M41, FtsH extracellular
			JC_C100010126	Protein of unknown function DUF292, eukaryotic
			JC_C100015900	Multi antimicrobial extrusion protein MatE
			JC_C100022819	U box domain IPR016024; Armadillo-type fold
			JC_C100017316	SNARE associated Golgi protein
			JC_C100025187	Cytochrome b5 IPR005804; Fatty acid desaturase, type 1
			JC_C100018485	RFT1
			JC_C100026114	Conserved hypothetical protein CHP02058
			JC_C100008956	Peptidase A1 IPR009007; Peptidase aspartic, catalytic
			JC_C100005395	Short-chain dehydrogenase/reductase SDR IPR016040; NAD(P)-binding domain
			JC_C100005615	-
			JC_C100012834	Calcium-binding EF-hand IPR018248; EF-Hand domain IPR018249; EF-HAND 2
			JC_C100026963	Methyl-CpG DNA binding IPR011124; Zinc finger, CW-type IPR016177; DNA-binding, integrase-type
			JC_C100016730	Ubiquitin IPR003103; Apoptosis regulator, Bcl-2 protein, BAG IPR019955; Ubiquitin supergroup
			JC_C100017716	Multi antimicrobial extrusion protein MatE
			JC_C100001426	-
			JC_C100011022	-
			JC_C100018638	GH3 auxin-responsive promoter
			JC_C100021900	Protein of unknown function DUF868, plant
			JC_C100021113	Peptidase S10, serine carboxypeptidase
			JC_C100024852	Glycoside hydrolase family 79, N-terminal
			JC_C100012935	Sulphate transporter/antisigma-factor antagonist STAS IPR011547; Sulphate transporter
			JC_C100007934	Zinc finger, PHD-type IPR011011; Zinc finger, FYVE/PHD-type IPR016181; Acyl-CoA N-acyltransferase IPR019787; Zinc finger, PHD-finger
			JC_C100013994	ENT IPR008395; Agenet IPR014002; Tudor-like, plant
			JC_C100007875	Transferase
			JC_C100015856	Yippee-like protein
			JC_C100008512	Pyridine nucleotide-disulphide oxidoreductase, NAD-binding region IPR002938; Monooxygenase, FAD-binding
			JC_C100006912	Amino acid transporter, transmembrane
			JC_C100023051	Allinase, C-terminal IPR015424; Pyridoxal phosphate-dependent transferase, major region
			JC_C100014956	IQ calmodulin-binding region
			JC_C100018812	Heat shock protein Hsp20 IPR008978; HSP20-like chaperone
			JC_C100003710	-
			JC_C100024578	Protein of unknown function DUF248, methyltransferase putative
			JC_C100026547	Octicosapeptide/Phox/Bem1p
			JC_C100018020	Multi antimicrobial extrusion protein MatE
			JC_C100011699	Aph-1
			JC_C100031913	-
			JC_C100008160	Transcription factor CBF/NF-Y/archaeal histone IPR009072; Histone-fold
			JC_C100015803	Cyclin-like F-box IPR013187; F-box associated type 3
			JC_C100023761	Protein of unknown function DUF231, plant
			JC_C100006195	-
			JC_C100010521	Protein kinase, catalytic domain IPR002290; Serine/threonine-protein kinase domain IPR011009; Protein kinase-like domain IPR017442; Serine/threonine-protein kinase-like domain IPR020635; Tyrosine-protein kinase, subgroup, catalytic domain
			JC_C100014421	RNA polymerase sigma-70 region 3 IPR007627; RNA polymerase sigma-70 region 2 IPR007630; RNA polymerase sigma-70 region 4 IPR013324; RNA polymerase sigma factor, region 3/4 IPR013325; RNA polymerase sigma factor, region 2
			JC_C100013085	Short-chain dehydrogenase/reductase SDR IPR016040; NAD(P)-binding domain
			JC_C100014795	Zinc finger, C2H2-type
			JC_C100013842	Oxoglutarate/iron-dependent oxygenase
			JC_C100026753	PDZ/DHR/GLGF IPR005151; Peptidase S41
			JC_C100016439	Methyl-CpG DNA binding IPR016177; DNA-binding, integrase-type
			JC_C100021693	ABC transporter-like IPR003593; ATPase, AAA+ type, core
			JC_C100004630	-
			JC_C100006454	Small nuclear RNA activating complex (SNAPc), subunit SNAP43
			JC_C100007715	Delayed-early response protein/equilibrative nucleoside transporter
			JC_C100019006	Tify IPR018467; CCT domain-like
			JC_C100002569	PDZ/DHR/GLGF IPR008915; Peptidase M50
			JC_C100026919	Terpene synthase-like IPR005630; Terpene synthase, metal-binding domain IPR008930; Terpenoid cylases/protein prenyltransferase alpha-alpha toroid IPR008949; Terpenoid synthase
			JC_C100005070	Snf7
			JC_C100019042	Peptidase A1 IPR007856; Saposin-like type B, 1 IPR008138; Saposin-like type B, 2 IPR008139; Saposin B IPR009007; Peptidase aspartic, catalytic IPR011001; Saposin-like
			JC_C100013625	-
			JC_C100026168	Oligopeptide transporter IPR016196; Major facilitator superfamily, general substrate transporter
			JC_C100016528	-
			JC_C100001518	Protein phosphatase 2C-related IPR014045; Protein phosphatase 2C, N-terminal
			JC_C100006490	Protein kinase, catalytic domain IPR002290; Serine/threonine-protein kinase domain IPR011009; Protein kinase-like domain IPR017442; Serine/threonine-protein kinase-like domain IPR020635; Tyrosine-protein kinase, subgroup, catalytic domain
			JC_C100011590	TLDc
			JC_C100001751	Aldose 1-epimerase IPR011013; Glycoside hydrolase-type carbohydrate-binding
			JC_C100001335	Tetratricopeptide TPR-1 IPR013026; Tetratricopeptide region IPR019734; Tetratricopeptide repeat
			JC_C100018445	Iron sulphur domain-containing, CDGSH-type, subfamily IPR018967; Iron sulphur domain-containing, CDGSH-type
			JC_C100017961	Protein kinase, catalytic domain IPR011009; Protein kinase-like domain
			JC_C100023573	GO:0030964;GO:0005746//mitochondrial respiratory chain
			JC_C100026748	PAS IPR000700; PAS-associated, C-terminal IPR003018; GAF IPR003594; ATP-binding region, ATPase-like IPR003661; Signal transduction histidine kinase, subgroup 1, dimerisation/phosphoacceptor region IPR005467; Signal transduction histidine kinase, core IPR013515; Phytochrome, central region IPR013654; PAS fold-2 IPR013767; PAS fold IPR016132; Phytochrome chromophore attachment domain
			JC_C100010083	S1/P1 nuclease IPR008947; Phospholipase C/P1 nuclease, core
			JC_C100017155	Beta-ketoacyl synthase, N-terminal IPR014031; Beta-ketoacyl synthase, C-terminal IPR016039; Thiolase-like IPR020841; Polyketide synthase, beta-ketoacyl synthase region
			JC_C100018093	Coagulation factor 5/8 type, C-terminal IPR000933; Glycoside hydrolase, family 29 IPR017853; Glycoside hydrolase, catalytic core
			JC_C100010137	Lateral organ boundaries, LOB
			JC_C100006542	Cytochrome P450
			JC_C100017392	-
			JC_C100023683	Glutathione S-transferase, N-terminal IPR004046; Glutathione S-transferase, C-terminal IPR010987; Glutathione S-transferase, C-terminal-like IPR012336; Thioredoxin-like fold IPR017933; Glutathione S-transferase/chloride channel, C-terminal
			JC_C100013191	Globin, subset IPR009050; Globin-like
			JC_C100001524	Cytochrome P450
			JC_C100014955	Sulphate transporter/antisigma-factor antagonist STAS IPR011547; Sulphate transporter
			JC_C100024464	Lipase, class 3
			JC_C100013686	Protein of unknown function DUF292, eukaryotic
			JC_C100001412	ABC transporter, transmembrane region IPR003439; ABC transporter-like IPR003593; ATPase, AAA+ type, core IPR011527; ABC transporter, transmembrane region, type 1 IPR017940; ABC transporter integral membrane type 1
			JC_C100005286	Oligopeptide transporter IPR016196; Major facilitator superfamily, general substrate transporter
			JC_C100018818	Kinesin, motor region
			JC_C100019680	EF-HAND 2
			JC_C100013674	Protein of unknown function DUF623, plant
			JC_C100030946	-
			JC_C100009268	Peptidase S10, serine carboxypeptidase
			JC_C100027783	C2 calcium-dependent membrane targeting IPR008973; C2 calcium/lipid-binding region, CaLB IPR013583; Phosphoribosyltransferase C-terminal, plant IPR018029; C2 membrane targeting protein
			JC_C100009777	Photosystem I reaction centre, subunit XI PsaL
			JC_C100012112	Transcription factor, MADS-box IPR002487; Transcription factor, K-box
			JC_C100023234	Fatty acid desaturase, type 2 IPR009078; Ferritin/ribonucleotide reductase-like
			JC_C100017927	GO:0043231//intracellular membrane-bounded organelle
			JC_C100013404	Fatty acid desaturase, type 1
			JC_C100030011	Leucine-rich repeat IPR003591; Leucine-rich repeat, typical subtype IPR013210; Leucine-rich repeat, N-terminal
			JC_C100002987	Zinc finger, RING-type IPR004331; SPX, N-terminal IPR018957; Zinc finger, C3HC4 RING-type
			JC_C100017994	-
			JC_C100001345	Oxoglutarate/iron-dependent oxygenase
			JC_C100011432	Protein of unknown function DUF607
			JC_C100018586	Transketolase-like, pyrimidine-binding domain IPR005476; Transketolase, C-terminal IPR009014; Transketolase, C-terminal/Pyruvate-ferredoxin oxidoreductase, domain II
			JC_C100022241	Protein of unknown function DUF250
			JC_C100007191	Glycosyl-phosphatidyl inositol-anchored, plant
			JC_C100007076	Thioredoxin-like fold
			JC_C100012275	Lipase, GDSL IPR013830; Esterase, SGNH hydrolase-type
			JC_C100021478	Epsin, N-terminal IPR008942; ENTH/VHS IPR013809; Epsin-like, N-terminal
			JC_C100004360	EGF-like calcium-binding IPR003137; Protease-associated PA IPR009030; Growth factor, receptor
			JC_C100024429	EF-HAND 2
			JC_C100021551	Zinc finger, RING-type
			JC_C100018365	Lipopolysaccharide-modifying protein IPR008539; Protein of unknown function DUF821, CAP10-like
			JC_C100021638	Glycosyl transferase, family 20 IPR003337; Trehalose-phosphatase
			JC_C100006059	Plant regulator RWP-RK
			JC_C100001662	-
			JC_C100013819	Protein of unknown function DUF59 IPR019591; ATPase-like, ParA/MinD
			JC_C100015013	SPX, N-terminal IPR004342; EXS, C-terminal
			JC_C100004183	Nse4
			JC_C100012080	-
			JC_C100018386	Homeobox IPR002913; Lipid-binding START IPR009057; Homeodomain-like
			JC_C100014874	Cyclin-like F-box IPR006527; F-box associated
			JC_C100025049	Photosystem I reaction centre protein PsaF, subunit III
			JC_C100016692	Pentatricopeptide repeat
			JC_C100005859	Auxin responsive SAUR protein
			JC_C100020633	Protein of unknown function DUF248, methyltransferase putative
			JC_C100015625	Protein of unknown function DUF231, plant
			JC_C100024979	No apical meristem (NAM) protein
			JC_C100005578	-
			JC_C100008489	DNA methylase, C-5 cytosine-specific
			JC_C100021134	SANT, DNA-binding IPR009057; Homeodomain-like IPR014778; Myb, DNA-binding IPR017930; Myb-type HTH DNA-binding domain
			JC_C100004731	Protein kinase, catalytic domain IPR001611; Leucine-rich repeat IPR002290; Serine/threonine-protein kinase domain IPR003591; Leucine-rich repeat, typical subtype IPR011009; Protein kinase-like domain IPR013210; Leucine-rich repeat, N-terminal IPR017442; Serine/threonine-protein kinase-like domain IPR020635; Tyrosine-protein kinase, subgroup, catalytic domain
			JC_C100020666	Protein kinase, catalytic domain IPR002290; Serine/threonine-protein kinase domain IPR011009; Protein kinase-like domain IPR017442; Serine/threonine-protein kinase-like domain IPR020635; Tyrosine-protein kinase, subgroup, catalytic domain
			JC_C100023087	Lipase, GDSL
			JC_C100020932	ADC synthase IPR015890; Chorismate binding, C-terminal
			JC_C100010865	Hexokinase
			JC_C100007350	Pathogenesis-related transcriptional factor/ERF, DNA-binding IPR016177; DNA-binding, integrase-type
			JC_C100008813	Peptidase M16, C-terminal IPR011249; Metalloenzyme, LuxS/M16 peptidase-like, metal-binding IPR011765; Peptidase M16, N-terminal
			JC_C100025475	Peptidase S8/S53, subtilisin/kexin/sedolisin
			JC_C100016233	NAD-dependent epimerase/dehydratase IPR016040; NAD(P)-binding domain
			JC_C100018945	Signal transduction response regulator, receiver region IPR011006; CheY-like
			JC_C100005512	Phytosulfokine
			JC_C100017192	Protein kinase, catalytic domain IPR002290; Serine/threonine-protein kinase domain IPR010632; Protein of unknown function DUF1221 IPR011009; Protein kinase-like domain IPR017442; Serine/threonine-protein kinase-like domain IPR020635; Tyrosine-protein kinase, subgroup, catalytic domain
			JC_C100010131	Glycolipid transfer protein, GLTP
			JC_C100005068	Inositol polyphosphate related phosphatase IPR005135; Endonuclease/exonuclease/phosphatase
			JC_C100026531	Protein kinase, catalytic domain IPR000858; S-locus glycoprotein IPR001480; Curculin-like (mannose-binding) lectin IPR002290; Serine/threonine-protein kinase domain IPR003609; Apple-like IPR011009; Protein kinase-like domain IPR013227; PAN-2 domain IPR017442; Serine/threonine-protein kinase-like domain IPR020635; Tyrosine-protein kinase, subgroup, catalytic domain
			JC_C100002387	Photosystem II oxygen evolving complex protein PsbP IPR016124; Mog1/PsbP/DUF1795, alpha/beta/alpha sandwich
			JC_C100011542	Protein kinase, catalytic domain IPR002048; Calcium-binding EF-hand IPR002290; Serine/threonine-protein kinase domain IPR011009; Protein kinase-like domain IPR017442; Serine/threonine-protein kinase-like domain IPR018248; EF-Hand domain IPR018249; EF-HAND 2 IPR020635; Tyrosine-protein kinase, subgroup, catalytic domain
			JC_C100018279	Magnesium chelatase, ChlI subunit IPR002035; von Willebrand factor, type A IPR003593; ATPase, AAA+ type, core
			JC_C100024309	PAPA-1-like conserved region IPR007529; Zinc finger, HIT-type
			JC_C100024643	Protein of unknown function DUF641, plant
			JC_C100002577	Protein kinase, catalytic domain IPR002290; Serine/threonine-protein kinase domain IPR011009; Protein kinase-like domain IPR017442; Serine/threonine-protein kinase-like domain IPR020635; Tyrosine-protein kinase, subgroup, catalytic domain
			JC_C100008288	Zinc finger, RING-type IPR018957; Zinc finger, C3HC4 RING-type
			JC_C100023134	AMP-dependent synthetase/ligase
			JC_C100026040	Domain of unknown function DUF1771
			JC_C100017430	GO:0009534//chloroplast thylakoid
			JC_C100015051	Glycosyl transferase, family 4, conserved region
			JC_C100025071	Cupin 1 IPR011051; Cupin, RmlC-type
			JC_C100012795	Peptidase S10, serine carboxypeptidase
			JC_C100026828	Alpha/beta hydrolase fold-3
			JC_C100009298	Protein of unknown function DUF6, transmembrane
			JC_C100020833	Zinc finger, RING-type IPR018957; Zinc finger, C3HC4 RING-type
			JC_C100020139	SANT, DNA-binding IPR009057; Homeodomain-like IPR014778; Myb, DNA-binding IPR017930; Myb-type HTH DNA-binding domain
			JC_C100013584	Ubiquitin supergroup
			JC_C100025252	Amino acid transporter, transmembrane
			JC_C100017666	-
			JC_C100013591	Tetratricopeptide region
			JC_C100016318	Glycosyl transferase, family 14
			JC_C100003869	-
			JC_C100000614	Protein kinase, catalytic domain IPR001611; Leucine-rich repeat IPR002290; Serine/threonine-protein kinase domain IPR003591; Leucine-rich repeat, typical subtype IPR011009; Protein kinase-like domain IPR013210; Leucine-rich repeat, N-terminal IPR017442; Serine/threonine-protein kinase-like domain IPR020635; Tyrosine-protein kinase, subgroup, catalytic domain
			JC_C100010878	Ribosomal protein L53, mitochondrial
			JC_C100023191	Protein-tyrosine phosphatase, SIW14-like
			JC_C100003349	Methyltransferase type 11
			JC_C100020357	Zinc finger, FYVE-type IPR000408; Regulator of chromosome condensation, RCC1 IPR009091; Regulator of chromosome condensation/beta-lactamase-inhibitor protein II IPR011011; Zinc finger, FYVE/PHD-type IPR013591; Disease resistance/zinc finger/chromosome condensation-like region IPR017455; Zinc finger, FYVE-related
			JC_C100023561	UAA transporter
			JC_C100008933	VQ
			JC_C100023575	-
			JC_C100024953	Pathogenesis-related transcriptional factor/ERF, DNA-binding IPR016177; DNA-binding, integrase-type
			JC_C100010418	Cyclin-like F-box
			JC_C100018839	GO:0031410//cytoplasmic vesicle
			JC_C100004289	Nucleoside phosphatase GDA1/CD39
			JC_C100022157	Alpha/beta hydrolase fold-1 IPR012001; Thiamine pyrophosphate enzyme, N-terminal TPP binding region IPR013342; Mandelate racemase/muconate lactonizing enzyme, C-terminal
			JC_C100000592	Zinc finger, RING-type IPR010652; Protein of unknown function DUF1232 IPR018957; Zinc finger, C3HC4 RING-type
			JC_C100011709	-
			JC_C100002007	tRNA isopentenyltransferase
			JC_C100004224	-
			JC_C100008843	NAD-dependent glycerol-3-phosphate dehydrogenase, C-terminal IPR008927; 6-phosphogluconate dehydrogenase, C-terminal-like IPR011128; NAD-dependent glycerol-3-phosphate dehydrogenase, N-terminal IPR016040; NAD(P)-binding domain
			JC_C100005677	-
			JC_C100021302	Peptidase S28
			JC_C100006417	Glycine cleavage T-protein, N-terminal IPR013977; Glycine cleavage T-protein, C-terminal barrel
			JC_C100016977	Pyridoxal phosphate-dependent enzyme, beta subunit
			JC_C100015592	NAD-dependent epimerase/dehydratase IPR016040; NAD(P)-binding domain
			JC_C100005860	GTP-binding protein, HSR1-related IPR012676; TGS-like IPR013029; Protein of unknown function DUF933
			JC_C100002815	Pentatricopeptide repeat
			JC_C100005948	Domain of unknown function DUF89
			JC_C100020537	GO:0009527//plastid outer membrane
			JC_C100020529	Cyclin-like F-box
			JC_C100028902	Sterile alpha motif SAM IPR010993; Sterile alpha motif homology
			JC_C100009521	Transketolase-like, pyrimidine-binding domain IPR005476; Transketolase, C-terminal IPR009014; Transketolase, C-terminal/Pyruvate-ferredoxin oxidoreductase, domain II
			JC_C100002628	Metallophosphoesterase
			JC_C100022211	SET IPR015353; Rubisco LSMT substrate-binding
			JC_C100023115	Cytochrome P450
			JC_C100003075	Transcription factor, FAR1-related IPR006564; Zinc finger, PMZ-type IPR007527; Zinc finger, SWIM-type IPR018289; MULE transposase, conserved domain
			JC_C100018470	Trehalose-phosphatase
			JC_C100003240	Protein of unknown function DUF579, plant
			JC_C100010014	Zinc finger, SWIM-type
			JC_C100017107	Protein of unknown function DUF604
			JC_C100020277	Protein of unknown function DUF250
			JC_C100007808	Peptidase S1/S6, chymotrypsin/Hap IPR001478; PDZ/DHR/GLGF IPR009003; Serine/cysteine peptidase, trypsin-like
			JC_C100013204	Protein of unknown function DUF677
			JC_C100006932	Ubiquitin-conjugating enzyme, E2 IPR016135; Ubiquitin-conjugating enzyme/RWD-like
			JC_C100025756	Ndr
			JC_C100009011	GO:0043231//intracellular membrane-bounded organelle
			JC_C100002312	RNA recognition motif, RNP-1
			JC_C100013798	Pentatricopeptide repeat
			JC_C100021032	Zinc finger, Dof-type
			JC_C100000458	FAD dependent oxidoreductase
			JC_C100009488	ATPase, P-type cation-transporter, N-terminal IPR005834; Haloacid dehalogenase-like hydrolase IPR006068; ATPase, P-type cation-transporter, C-terminal IPR008250; ATPase, P-type, ATPase-associated region
			JC_C100015529	Lipase, class 3
			JC_C100022596	SEC7-like
			JC_C100005740	-
			JC_C100008625	NB-ARC
			JC_C100023360	Serine-threonine protein kinase 19
			JC_C100008976	Protein of unknown function DUF6, transmembrane
			JC_C100014384	MYB-like
			JC_C100024481	Harpin-induced 1
			JC_C100020057	-
			JC_C100021986	Glycoside hydrolase, family 47
			JC_C100011287	Ubiquitin-conjugating enzyme, E2 IPR016135; Ubiquitin-conjugating enzyme/RWD-like
			JC_C100021167	Transcriptional factor B3 IPR010525; Auxin response factor IPR011525; Aux/IAA-ARF-dimerisation
			JC_C100028508	NPH3 IPR011333; BTB/POZ fold
			JC_C100013175	Formylmethionine deformylase
			JC_C100021075	Protein kinase, catalytic domain IPR002290; Serine/threonine-protein kinase domain IPR011009; Protein kinase-like domain IPR017442; Serine/threonine-protein kinase-like domain IPR020635; Tyrosine-protein kinase, subgroup, catalytic domain
			JC_C100003581	Zinc finger, PHD-type IPR011011; Zinc finger, FYVE/PHD-type IPR019787; Zinc finger, PHD-finger
			JC_C100004709	-
			JC_C100007902	YbaK/aminoacyl-tRNA synthetase associated region
			JC_C100006846	Leucine-rich repeat IPR003591; Leucine-rich repeat, typical subtype IPR013210; Leucine-rich repeat, N-terminal
			JC_C100015545	Protein of unknown function DUF1336
			JC_C100019510	GO:0043231//intracellular membrane-bounded organelle
			JC_C100002520	Protein kinase, catalytic domain IPR011009; Protein kinase-like domain IPR017442; Serine/threonine-protein kinase-like domain
			JC_C100007683	Abortive infection protein
			JC_C100005637	DNA/RNA helicase, C-terminal IPR002121; Helicase/RNase D C-terminal, HRDC domain IPR011545; DNA/RNA helicase, DEAD/DEAH box type, N-terminal IPR014001; DEAD-like helicase, N-terminal IPR014021; Helicase, superfamily 1/2, ATP-binding domain IPR018982; RQC domain
			JC_C100018744	Exonuclease IPR012337; Polynucleotidyl transferase, ribonuclease H fold IPR013520; Exonuclease, RNase T/DNA polymerase III
			JC_C100016847	-
			JC_C100010269	Cas1p-like
			JC_C100019796	Lipid-binding serum glycoprotein, C-terminal IPR017942; Lipid-binding serum glycoprotein, N-terminal IPR017943; Bactericidal permeability-increasing protein, alpha/beta domain
			JC_C100026896	Tify IPR018467; CCT domain-like
			JC_C100016229	Domain of unknown function DUF1995
			JC_C100019216	General substrate transporter IPR016196; Major facilitator superfamily, general substrate transporter
			JC_C100019346	Protein of unknown function DUF239, plant
			JC_C100024471	GH3 auxin-responsive promoter
			JC_C100023908	-
			JC_C100021328	Nodulin-like IPR016196; Major facilitator superfamily, general substrate transporter
			JC_C100026364	GO:0043234//protein complex;GO:0009536//plastid
			JC_C100003891	C2 calcium-dependent membrane targeting IPR008973; C2 calcium/lipid-binding region, CaLB
			JC_C100010888	Forkhead-associated IPR008984; SMAD/FHA domain
			JC_C100004158	-
			JC_C100018709	Glycoside hydrolase, family 28 IPR006626; Parallel beta-helix repeat IPR011050; Pectin lyase fold/virulence factor
			JC_C100014485	ENT
			JC_C100010463	SNF2-related IPR001650; DNA/RNA helicase, C-terminal IPR014001; DEAD-like helicase, N-terminal IPR014021; Helicase, superfamily 1/2, ATP-binding domain
			JC_C100019039	Basic helix-loop-helix dimerisation region bHLH IPR011598; Helix-loop-helix DNA-binding
			JC_C100001985	Transcription initiation factor IIF, beta subunit IPR011039; Transcription Factor IIF, Rap30/Rap74, interaction
			JC_C100018980	C2 calcium-dependent membrane targeting IPR008973; C2 calcium/lipid-binding region, CaLB
			JC_C100016007	Zinc finger, CCHC-type IPR010666; Zinc finger, GRF-type IPR017896; 4Fe-4S ferredoxin, iron-sulpur binding domain
			JC_C100020191	Deoxyribonuclease/rho motif-related TRAM IPR007848; Methyltransferase small IPR016027; Nucleic acid-binding, OB-fold-like
			JC_C100005318	Protein kinase, catalytic domain IPR002290; Serine/threonine-protein kinase domain IPR011009; Protein kinase-like domain IPR017442; Serine/threonine-protein kinase-like domain IPR020635; Tyrosine-protein kinase, subgroup, catalytic domain
			JC_C100005179	Pentatricopeptide repeat
			JC_C100021245	GO:0043231//intracellular membrane-bounded organelle
			JC_C100007890	Protein of unknown function FPL
			JC_C100005018	-
			JC_C100009039	Glycoside hydrolase, family 9 IPR008928; Six-hairpin glycosidase-like
			JC_C100020391	-
			JC_C100011907	Protein of unknown function DUF266, plant
			JC_C100009213	Tetrapyrrole biosynthesis, uroporphyrinogen III synthase
			JC_C100009853	-
			JC_C100026393	Peptidase aspartic, catalytic
			JC_C100026363	Protein of unknown function DUF868, plant
			JC_C100004421	Transferase
			JC_C100025003	Oxoglutarate/iron-dependent oxygenase
			JC_C100020866	Prefoldin
			JC_C100021620	Zinc finger, RING-type
			JC_C100011951	Zinc finger, RING-type IPR018957; Zinc finger, C3HC4 RING-type
			JC_C100002755	-
			JC_C100019315	GO:0009532//plastid stroma
			JC_C100004000	DNA/RNA helicase, C-terminal IPR006935; Restriction endonuclease, type I, R subunit/Type III, Res subunit IPR014001; DEAD-like helicase, N-terminal IPR014021; Helicase, superfamily 1/2, ATP-binding domain
			JC_C100026605	Glycoside hydrolase, clan GH-D IPR017853; Glycoside hydrolase, catalytic core
			JC_C100014966	Calcium-binding EF-hand IPR018248; EF-Hand domain IPR018249; EF-HAND 2
			JC_C100022940	DENN IPR005112; dDENN IPR005113; uDENN
			JC_C100002777	Cellular retinaldehyde-binding/triple function, C-terminal IPR008273; Cellular retinaldehyde-binding/triple function, N-terminal IPR011074; Phosphatidylinositol transfer protein-like, N-terminal
			JC_C100018442	Lipase/lipooxygenase, PLAT/LH2 IPR010417; Embryo-specific 3
			JC_C100024721	Ras small GTPase, Ras type IPR003578; Ras small GTPase, Rho type IPR003579; Ras small GTPase, Rab type IPR013753; Ras
			JC_C100018032	SKP1 component IPR011333; BTB/POZ fold IPR016072; SKP1 component, dimerisation IPR016073; SKP1 component, POZ
			JC_C100026302	Carbohydrate/purine kinase
			JC_C100023317	Carbohydrate/purine kinase
			JC_C100017314	-
			JC_C100007598	Glycosyl transferase, family 14
			JC_C100013873	GO:0043234//protein complex
			JC_C100027352	-
			JC_C100025625	Protein of unknown function DUF1313
			JC_C100000761	GO:0016020//membrane
			JC_C100016760	Protein kinase, catalytic domain IPR001245; Tyrosine-protein kinase, catalytic domain IPR002290; Serine/threonine-protein kinase domain IPR011009; Protein kinase-like domain IPR020635; Tyrosine-protein kinase, subgroup, catalytic domain
			JC_C100015457	GO:0031410//cytoplasmic vesicle
			JC_C100018201	Glycosyl transferase, family 29
			JC_C100018234	Heat shock protein DnaJ, N-terminal
			JC_C100024080	Pentatricopeptide repeat
			JC_C100008642	Rieske [2Fe-2S] iron-sulphur domain
			JC_C100018895	Protein of unknown function DUF593
			JC_C100010516	FBD
			JC_C100007894	Homeobox IPR001965; Zinc finger, PHD-type IPR009057; Homeodomain-like IPR011011; Zinc finger, FYVE/PHD-type IPR019787; Zinc finger, PHD-finger
			JC_C100026099	DNA/RNA helicase, C-terminal IPR007502; Helicase-associated region IPR011709; Domain of unknown function DUF1605 IPR014001; DEAD-like helicase, N-terminal IPR014021; Helicase, superfamily 1/2, ATP-binding domain
			JC_C100008495	-
			JC_C100022696	Homeobox IPR003106; Leucine zipper, homeobox-associated IPR009057; Homeodomain-like
			JC_C100018352	Metridin-like ShK toxin IPR006620; Prolyl 4-hydroxylase, alpha subunit
			JC_C100021112	Snf7
			JC_C100009495	Cyclin, C-terminal IPR006670; Cyclin IPR006671; Cyclin, N-terminal IPR011028; Cyclin-like
			JC_C100001536	-
			JC_C100010670	-
			JC_C100013007	Amino acid transporter, transmembrane
			JC_C100009612	Rop nucleotide exchanger, PRONE
			JC_C100020635	Glutaredoxin IPR012336; Thioredoxin-like fold
			JC_C100019337	Protein kinase, catalytic domain IPR001611; Leucine-rich repeat IPR002290; Serine/threonine-protein kinase domain IPR003591; Leucine-rich repeat, typical subtype IPR011009; Protein kinase-like domain IPR013210; Leucine-rich repeat, N-terminal IPR017442; Serine/threonine-protein kinase-like domain IPR020635; Tyrosine-protein kinase, subgroup, catalytic domain
			JC_C100013207	Flavodoxin/nitric oxide synthase
			JC_C100013824	GO:0043231//intracellular membrane-bounded organelle
			JC_C100000931	RNA recognition motif, RNP-1 IPR003954; RNA recognition, region 1
			JC_C100004573	Zinc finger, GATA-type
			JC_C100013267	Kelch repeat type 1 IPR011043; Galactose oxidase/kelch, beta-propeller IPR011498; Kelch repeat type 2
			JC_C100007045	Kelch repeat type 1 IPR011043; Galactose oxidase/kelch, beta-propeller
			JC_C100008083	-
			JC_C100008202	Peptidyl-tRNA hydrolase
			JC_C100016152	BRO1
			JC_C100007262	Glycosyl transferase, family 8
			JC_C100008200	Proteasome, subunit alpha/beta
			JC_C100020623	SNF2-related IPR001650; DNA/RNA helicase, C-terminal IPR014001; DEAD-like helicase, N-terminal IPR014021; Helicase, superfamily 1/2, ATP-binding domain
			JC_C100022089	-
			JC_C100022643	Protein of unknown function DUF647
			JC_C100021885	DNA polymerase III, clamp loader complex, gamma/delta/delta subunit, C-terminal
			JC_C100022440	U box domain IPR016024; Armadillo-type fold
			JC_C100025661	Abortive infection protein
			JC_C100007993	Formyl transferase, N-terminal
			JC_C100023035	GO:0044464//cell part
			JC_C100001722	-
			JC_C100007940	-
			JC_C100009425	GO:0016020//membrane
			JC_C100001234	Protein kinase, catalytic domain IPR001932; Protein phosphatase 2C-related IPR011009; Protein kinase-like domain IPR014045; Protein phosphatase 2C, N-terminal IPR017442; Serine/threonine-protein kinase-like domain
			JC_C100026503	Nuclear transport factor 2 IPR018222; Nuclear transport factor 2, Eukaryote
			JC_C100013817	Fibronectin, type III IPR008957; Fibronectin, type III-like fold
			JC_C100009175	EF-Hand domain IPR018249; EF-HAND 2
			JC_C100019922	WD40 repeat IPR006594; LisH dimerisation motif IPR011046; WD40 repeat-like-containing domain IPR013720; LisH dimerisation motif, subgroup IPR017986; WD40-repeat-containing domain IPR019781; WD40 repeat, subgroup IPR019782; WD40 repeat 2
			JC_C100019289	Aldo/keto reductase
			JC_C100013624	Protein of unknown function DUF642 IPR008979; Galactose-binding like
			JC_C100016687	NADH:flavin oxidoreductase/NADH oxidase, N-terminal
			JC_C100006245	SET IPR001965; Zinc finger, PHD-type IPR011011; Zinc finger, FYVE/PHD-type IPR019787; Zinc finger, PHD-finger
			JC_C100003486	3-oxo-5-alpha-steroid 4-dehydrogenase, C-terminal IPR010721; Protein of unknown function DUF1295
			JC_C100016503	Protein of unknown function DUF179
			JC_C100001620	Protein kinase, catalytic domain IPR002290; Serine/threonine-protein kinase domain IPR011009; Protein kinase-like domain IPR017442; Serine/threonine-protein kinase-like domain IPR020635; Tyrosine-protein kinase, subgroup, catalytic domain
			JC_C100005687	K+ potassium transporter
			JC_C100024426	Ran GTPase IPR003577; Ras small GTPase, Ras type IPR003578; Ras small GTPase, Rho type IPR003579; Ras small GTPase, Rab type IPR013753; Ras
			JC_C100004492	FAD-linked oxidase, C-terminal IPR006094; FAD linked oxidase, N-terminal IPR016164; FAD-linked oxidase-like, C-terminal IPR016166; FAD-binding, type 2
			JC_C100018732	Basic helix-loop-helix dimerisation region bHLH IPR011598; Helix-loop-helix DNA-binding
			JC_C100002084	Hydroxymethylglutaryl-CoA reductase, class I/II, catalytic IPR009023; Hydroxymethylglutaryl-CoA reductase, class I/II, NAD/NADP-binding IPR009029; Hydroxymethylglutaryl-CoA reductase, class I/II, substrate-binding
			JC_C100022480	Gibberellin regulated protein
			JC_C100001376	Vacuolar protein sorting-associated protein 26
			JC_C100008343	Protein kinase, catalytic domain IPR002290; Serine/threonine-protein kinase domain IPR011009; Protein kinase-like domain IPR017442; Serine/threonine-protein kinase-like domain IPR020635; Tyrosine-protein kinase, subgroup, catalytic domain
			JC_C100017149	GO:0005856//cytoskeleton
			JC_C100004835	Protein kinase, catalytic domain IPR002290; Serine/threonine-protein kinase domain IPR002314; Aminoacyl-tRNA synthetase, class II (G/ H/ P/ S), conserved region IPR004154; Anticodon-binding IPR006575; RWD IPR011009; Protein kinase-like domain IPR017442; Serine/threonine-protein kinase-like domain IPR020635; Tyrosine-protein kinase, subgroup, catalytic domain
			JC_C100025341	GO:0043231//intracellular membrane-bounded organelle
			JC_C100018317	C4-dicarboxylate transporter/malic acid transport protein
			JC_C100018141	Zinc finger, C2H2-type IPR015880; Zinc finger, C2H2-like
			JC_C100022771	Oligopeptide transporter OPT superfamily
			JC_C100003271	Protein of unknown function DUF620
			JC_C100009586	Major facilitator superfamily MFS-1 IPR016196; Major facilitator superfamily, general substrate transporter
			JC_C100012621	Protein kinase, catalytic domain IPR001245; Tyrosine-protein kinase, catalytic domain IPR002290; Serine/threonine-protein kinase domain IPR011009; Protein kinase-like domain IPR017442; Serine/threonine-protein kinase-like domain IPR020635; Tyrosine-protein kinase, subgroup, catalytic domain
			JC_C100034354	-
			JC_C100020341	-
			JC_C100014499	Vesicle transport v-SNARE
			JC_C100014296	Protein of unknown function DUF250
			JC_C100016773	Rhodanese-like
			JC_C100003134	Protein of unknown function DUF6, transmembrane
			JC_C100000262	U box domain
			JC_C100012116	GO:0044464//cell part
			JC_C100003988	High mobility group, superfamily
			JC_C100010101	ABC transporter-like IPR003593; ATPase, AAA+ type, core IPR013525; ABC-2 type transporter
			JC_C100015937	Target SNARE coiled-coil region IPR006011; Syntaxin, N-terminal IPR010989; t-SNARE
			JC_C100021914	Allinase, C-terminal IPR015424; Pyridoxal phosphate-dependent transferase, major region
			JC_C100010599	HSP20-like chaperone
			JC_C100008685	Protein kinase, catalytic domain IPR002290; Serine/threonine-protein kinase domain IPR011009; Protein kinase-like domain IPR017442; Serine/threonine-protein kinase-like domain IPR020635; Tyrosine-protein kinase, subgroup, catalytic domain
			JC_C100008013	-
			JC_C100008254	Ribosomal protein S7
			JC_C100015793	Transcription factor jumonji/aspartyl beta-hydroxylase IPR003349; Transcription factor jumonji, JmjN IPR003888; FY-rich, N-terminal IPR003889; FY-rich, C-terminal IPR004198; Zinc finger, C5HC2-type IPR013129; Transcription factor jumonji IPR018516; FY-rich, C-terminal subgroup IPR018518; FY-rich, N-terminal subgroup
			JC_C100025234	Pathogenesis-related transcriptional factor/ERF, DNA-binding IPR016177; DNA-binding, integrase-type
			JC_C100028803	-
			JC_C100011402	-
			JC_C100005001	Peptidase A1 IPR009007; Peptidase aspartic, catalytic
			JC_C100014676	Protein kinase, catalytic domain IPR002290; Serine/threonine-protein kinase domain IPR011009; Protein kinase-like domain IPR017442; Serine/threonine-protein kinase-like domain IPR020635; Tyrosine-protein kinase, subgroup, catalytic domain
			JC_C100024895	Rare lipoprotein A IPR007112; Expansin 45, endoglucanase-like IPR009009; Barwin-related endoglucanase
			JC_C100008768	Kinesin, motor region
			JC_C100008217	Multi antimicrobial extrusion protein MatE
			JC_C100014369	Glycoside hydrolase-type carbohydrate-binding
			JC_C100018891	DNA-binding WRKY IPR018872; Transcription factor, WRKY, Zn-cluster
			JC_C100009415	Glycoside hydrolase, family 5 IPR008999; Actin cross-linking IPR017853; Glycoside hydrolase, catalytic core
			JC_C100026865	Lipase, class 3
			JC_C100001932	Phospholipase C, phosphatidylinositol-specific , X region IPR017946; PLC-like phosphodiesterase, TIM beta/alpha-barrel domain
			JC_C100002229	Terpene synthase-like IPR005630; Terpene synthase, metal-binding domain IPR008930; Terpenoid cylases/protein prenyltransferase alpha-alpha toroid IPR008949; Terpenoid synthase
			JC_C100019318	Protein kinase, catalytic domain IPR002290; Serine/threonine-protein kinase domain IPR011009; Protein kinase-like domain IPR017442; Serine/threonine-protein kinase-like domain IPR020635; Tyrosine-protein kinase, subgroup, catalytic domain
			JC_C100026862	Mg2+ transporter protein, CorA-like
			JC_C100034182	Protein of unknown function DUF247, plant
			JC_C100006771	Gamma interferon inducible lysosomal thiol reductase GILT
			JC_C100021658	Lipase, class 3
			JC_C100010388	PAS IPR003018; GAF IPR003594; ATP-binding region, ATPase-like IPR003661; Signal transduction histidine kinase, subgroup 1, dimerisation/phosphoacceptor region IPR005467; Signal transduction histidine kinase, core IPR013515; Phytochrome, central region IPR013654; PAS fold-2 IPR013767; PAS fold IPR016132; Phytochrome chromophore attachment domain
			JC_C100021923	Nucleoside phosphatase GDA1/CD39
			JC_C100001059	Galactose-binding like IPR012919; Sad1/UNC-like, C-terminal
			JC_C100013855	Zinc finger, RING-CH-type IPR018957; Zinc finger, C3HC4 RING-type
			JC_C100009874	RNA-binding, CRM domain
			JC_C100025520	GO:0044464//cell part
			JC_C100010848	-
			JC_C100005820	-
			JC_C100014298	Leucine-rich repeat IPR002182; NB-ARC
			JC_C100015135	Protein kinase, catalytic domain IPR002290; Serine/threonine-protein kinase domain IPR011009; Protein kinase-like domain IPR017442; Serine/threonine-protein kinase-like domain IPR020635; Tyrosine-protein kinase, subgroup, catalytic domain
			JC_C100005219	Nucleolar 27S pre-rRNA processing, Urb2/Npa2
			JC_C100009374	ABC transporter, transmembrane region IPR003439; ABC transporter-like IPR003593; ATPase, AAA+ type, core IPR011527; ABC transporter, transmembrane region, type 1 IPR017940; ABC transporter integral membrane type 1
			JC_C100007603	GO:0009527//plastid outer membrane;GO:0019866//organelle inner membrane;GO:0009532//plastid stroma;GO:0009534//chloroplast thylakoid
			JC_C100000278	Zinc finger, LSD1-type
			JC_C100025007	D-galactoside/L-rhamnose binding SUEL lectin IPR001944; Glycoside hydrolase, family 35 IPR008979; Galactose-binding like IPR017853; Glycoside hydrolase, catalytic core
			JC_C100003937	Hypoxia induced protein, conserved region
			JC_C100013918	Pentatricopeptide repeat
			JC_C100025047	Disease resistance/zinc finger/chromosome condensation-like region
			JC_C100015866	BRO1
			JC_C100008005	-
			JC_C100007078	Armadillo IPR000719; Protein kinase, catalytic domain IPR011009; Protein kinase-like domain IPR016024; Armadillo-type fold IPR017442; Serine/threonine-protein kinase-like domain
			JC_C100022370	-
			JC_C100014508	Annexin IPR018502; Annexin repeat
			JC_C100012981	Peptidase M20 IPR011650; Peptidase M20, dimerisation
			JC_C100001747	Alpha/beta hydrolase fold-1
			JC_C100015829	Protein kinase, catalytic domain IPR002290; Serine/threonine-protein kinase domain IPR011009; Protein kinase-like domain IPR017442; Serine/threonine-protein kinase-like domain IPR020635; Tyrosine-protein kinase, subgroup, catalytic domain
			JC_C100019559	Formyl transferase, N-terminal
			JC_C100021347	Protein kinase, catalytic domain IPR001245; Tyrosine-protein kinase, catalytic domain IPR002290; Serine/threonine-protein kinase domain IPR011009; Protein kinase-like domain IPR020635; Tyrosine-protein kinase, subgroup, catalytic domain
			JC_C100023691	Tetratricopeptide TPR-1 IPR013026; Tetratricopeptide region IPR019734; Tetratricopeptide repeat
			JC_C100010764	Zinc finger, RING-type IPR018957; Zinc finger, C3HC4 RING-type
			JC_C100007784	Biotin/lipoyl attachment IPR011053; Single hybrid motif
			JC_C100017996	Cyclin-like F-box
			JC_C100006227	Translation elongation factor P/YeiP, central IPR008991; Translation protein SH3-like IPR013185; Translation elongation factor, KOW-like IPR015365; Elongation factor P, C-terminal IPR016027; Nucleic acid-binding, OB-fold-like
			JC_C100019663	Cytochrome c assembly protein, transmembrane region
			JC_C100024542	Lipase, class 3 IPR005592; Mono-/di-acylglycerol lipase, N-terminal
			JC_C100023980	GO:0044464//cell part
			JC_C100013190	-
			JC_C100011004	Rhodanese-like
			JC_C100005103	Mov34/MPN/PAD-1
			JC_C100015766	Cytidylyltransferase
			JC_C100009099	WD40 repeat IPR011046; WD40 repeat-like-containing domain IPR017956; AT hook, DNA-binding motif IPR019781; WD40 repeat, subgroup
			JC_C100023463	Glycoside hydrolase, family 5 IPR008997; Ricin B-related lectin IPR017853; Glycoside hydrolase, catalytic core
			JC_C100017451	SWIB/MDM2 domain IPR014876; DEK, C-terminal IPR019835; SWIB domain
			JC_C100019218	General substrate transporter IPR016196; Major facilitator superfamily, general substrate transporter
			JC_C100009978	Membrane attack complex component/perforin (MACPF) domain IPR020865; Membrane attack complex component/perforin (MACPF) domain, metazoa
			JC_C100004461	Lipase, class 3 IPR005592; Mono-/di-acylglycerol lipase, N-terminal
			JC_C100007179	EXS, C-terminal
			JC_C100001943	Pentatricopeptide repeat
			JC_C100016660	Nucleotide-sugar transporter
			JC_C100021322	Heavy metal transport/detoxification protein IPR008913; Zinc finger, CHY-type IPR017921; Zinc finger, CTCHY-type
			JC_C100021063	GO:0009527//plastid outer membrane;GO:0009534//chloroplast thylakoid
			JC_C100013618	WD40 repeat IPR007190; Periodic tryptophan protein-associated region IPR011044; Quinoprotein amine dehydrogenase, beta chain-like IPR011046; WD40 repeat-like-containing domain IPR017986; WD40-repeat-containing domain IPR019781; WD40 repeat, subgroup IPR019782; WD40 repeat 2
			JC_C100004943	-
			JC_C100022229	Pentatricopeptide repeat
			JC_C100011036	Peptidase S10, serine carboxypeptidase
			JC_C100001142	Peptidase S54, rhomboid
			JC_C100000658	Peptidase C78, ubiquitin fold modifier-specific peptidase 1/ 2
			JC_C100016711	Protein kinase, catalytic domain IPR001611; Leucine-rich repeat IPR002290; Serine/threonine-protein kinase domain IPR011009; Protein kinase-like domain IPR013210; Leucine-rich repeat, N-terminal IPR017442; Serine/threonine-protein kinase-like domain IPR020635; Tyrosine-protein kinase, subgroup, catalytic domain
			JC_C100026432	Aldo/keto reductase
			JC_C100022472	Transcription initiation factor TFIID component TAF4
			JC_C100023989	GO:0043234//protein complex;GO:0043231//intracellular membrane-bounded organelle
			JC_C100027755	Chromo domain IPR001525; DNA methylase, C-5 cytosine-specific IPR016197; Chromo domain-like
			JC_C100026533	Protein kinase, catalytic domain IPR000858; S-locus glycoprotein IPR001480; Curculin-like (mannose-binding) lectin IPR002290; Serine/threonine-protein kinase domain IPR003609; Apple-like IPR011009; Protein kinase-like domain IPR013227; PAN-2 domain IPR017442; Serine/threonine-protein kinase-like domain IPR020635; Tyrosine-protein kinase, subgroup, catalytic domain
			JC_C100008030	-
			JC_C100014105	Protein kinase, catalytic domain IPR001611; Leucine-rich repeat IPR002290; Serine/threonine-protein kinase domain IPR011009; Protein kinase-like domain IPR017442; Serine/threonine-protein kinase-like domain IPR020635; Tyrosine-protein kinase, subgroup, catalytic domain
			JC_C100003568	Haloacid dehalogenase-like hydrolase
			JC_C100026371	WD40 repeat IPR011046; WD40 repeat-like-containing domain IPR017986; WD40-repeat-containing domain IPR019781; WD40 repeat, subgroup IPR019782; WD40 repeat 2
			JC_C100016777	-
			JC_C100004813	Haloacid dehalogenase-like hydrolase
			JC_C100019632	-
			JC_C100013009	Peptidase S24/S26A/S26B/S26C IPR019759; Peptidase S24/S26A/S26B, conserved region
			JC_C100002558	Prephenate dehydratase IPR002912; Amino acid-binding ACT
			JC_C100021459	WD40 repeat IPR011046; WD40 repeat-like-containing domain IPR017986; WD40-repeat-containing domain IPR019781; WD40 repeat, subgroup IPR019782; WD40 repeat 2
			JC_C100026081	Optic atrophy 3-like
			JC_C100024045	RNA-binding, CRM domain
			JC_C100014223	ERCC4 domain
			JC_C100005600	GO:0030529//ribonucleoprotein complex
			JC_C100006715	Protein of unknown function DUF740
			JC_C100002471	DNA/RNA helicase, C-terminal IPR007502; Helicase-associated region IPR011709; Domain of unknown function DUF1605 IPR014001; DEAD-like helicase, N-terminal IPR014021; Helicase, superfamily 1/2, ATP-binding domain
			JC_C100020231	Tetratricopeptide TPR-1 IPR013026; Tetratricopeptide region IPR013105; Tetratricopeptide TPR2 IPR019734; Tetratricopeptide repeat
			JC_C100026047	Phosphoglycerate mutase
			JC_C100017457	Protein kinase, catalytic domain IPR002290; Serine/threonine-protein kinase domain IPR011009; Protein kinase-like domain IPR017442; Serine/threonine-protein kinase-like domain IPR020635; Tyrosine-protein kinase, subgroup, catalytic domain
			JC_C100023571	Peptidase M28
			JC_C100009809	Ran GTPase IPR003577; Ras small GTPase, Ras type IPR003578; Ras small GTPase, Rho type IPR003579; Ras small GTPase, Rab type IPR013753; Ras
			JC_C100011910	Protein kinase, catalytic domain IPR001245; Tyrosine-protein kinase, catalytic domain IPR011009; Protein kinase-like domain IPR020635; Tyrosine-protein kinase, subgroup, catalytic domain
			JC_C100006241	-
			JC_C100004312	-
			JC_C100013845	Argonaute/Dicer protein, PAZ IPR003165; Stem cell self-renewal protein Piwi IPR012337; Polynucleotidyl transferase, ribonuclease H fold IPR014811; Domain of unknown function DUF1785
			JC_C100023747	-
			JC_C100026082	-
			JC_C100000439	SRR1
			JC_C100013705	GO:0043231//intracellular membrane-bounded organelle
			JC_C100011164	Pentatricopeptide repeat
			JC_C100021530	AMP-dependent synthetase/ligase
			JC_C100016252	Protein kinase, catalytic domain IPR002290; Serine/threonine-protein kinase domain IPR011009; Protein kinase-like domain IPR017442; Serine/threonine-protein kinase-like domain IPR020635; Tyrosine-protein kinase, subgroup, catalytic domain
			JC_C100025478	Harpin-induced 1
			JC_C100002898	RHO protein GDP dissociation inhibitor IPR014756; Immunoglobulin E-set
			JC_C100026902	Chlorophyllase
			JC_C100024693	Chalcone/stilbene synthase, N-terminal IPR012328; Chalcone/stilbene synthase, C-terminal IPR016039; Thiolase-like
			JC_C100022628	Zinc finger, C2H2-type IPR015880; Zinc finger, C2H2-like
			JC_C100005775	Aminotransferase class-III IPR015424; Pyridoxal phosphate-dependent transferase, major region
			JC_C100004391	Transcription initiation factor IIF, alpha subunit IPR011039; Transcription Factor IIF, Rap30/Rap74, interaction
			JC_C100011528	ATPase, V0/A0 complex, 116kDa subunit
			JC_C100017092	Oxysterol-binding protein IPR001849; Pleckstrin homology
			JC_C100011354	Leucine-rich repeat
			JC_C100015406	MORN motif
			JC_C100008609	Protein kinase, catalytic domain IPR000858; S-locus glycoprotein IPR001480; Curculin-like (mannose-binding) lectin IPR002290; Serine/threonine-protein kinase domain IPR003014; PAN-1 domain IPR003609; Apple-like IPR011009; Protein kinase-like domain IPR017442; Serine/threonine-protein kinase-like domain IPR020635; Tyrosine-protein kinase, subgroup, catalytic domain
			JC_C100005678	Homeodomain-like IPR014778; Myb, DNA-binding
			JC_C100022499	Protein kinase, catalytic domain IPR000858; S-locus glycoprotein IPR001480; Curculin-like (mannose-binding) lectin IPR002290; Serine/threonine-protein kinase domain IPR003014; PAN-1 domain IPR003609; Apple-like IPR011009; Protein kinase-like domain IPR017442; Serine/threonine-protein kinase-like domain IPR020635; Tyrosine-protein kinase, subgroup, catalytic domain
			JC_C100025414	Protein of unknown function DUF250
			JC_C100017034	C2 calcium-dependent membrane targeting IPR001736; Phospholipase D/Transphosphatidylase IPR008973; C2 calcium/lipid-binding region, CaLB IPR018029; C2 membrane targeting protein
			JC_C100002793	-
			JC_C100025678	Pectinesterase, catalytic IPR006501; Pectinesterase inhibitor IPR011050; Pectin lyase fold/virulence factor
			JC_C100022095	ELM2 IPR001005; SANT, DNA-binding IPR014778; Myb, DNA-binding
			JC_C100000558	Heat shock protein 70
			JC_C100023877	Pentatricopeptide repeat
			JC_C100023458	Phosphate transporter
			JC_C100010966	YEATS
			JC_C100023562	Ovarian tumour, otubain
			JC_C100005058	Protein of unknown function DUF632 IPR006868; Protein of unknown function DUF630
			JC_C100021233	GroES-like IPR013149; Alcohol dehydrogenase, zinc-binding IPR016040; NAD(P)-binding domain IPR020843; Polyketide synthase, enoylreductase
			JC_C100009133	Protein of unknown function DUF298
			JC_C100005806	Protein kinase, catalytic domain IPR001480; Curculin-like (mannose-binding) lectin IPR002290; Serine/threonine-protein kinase domain IPR011009; Protein kinase-like domain IPR017442; Serine/threonine-protein kinase-like domain IPR020635; Tyrosine-protein kinase, subgroup, catalytic domain
			JC_C100021494	Zinc finger, RING-CH-type IPR018957; Zinc finger, C3HC4 RING-type
			JC_C100019958	ERCC4 domain IPR011335; Restriction endonuclease, type II-like, core
			JC_C100018205	Protein kinase, catalytic domain IPR002290; Serine/threonine-protein kinase domain IPR011009; Protein kinase-like domain IPR017442; Serine/threonine-protein kinase-like domain IPR020635; Tyrosine-protein kinase, subgroup, catalytic domain
			JC_C100023454	Armadillo IPR016024; Armadillo-type fold
			JC_C100011579	Transcription factor E2F/dimerisation partner (TDP)
			JC_C100003187	-
			JC_C100008088	Zinc finger, TAZ-type IPR000433; Zinc finger, ZZ-type IPR001965; Zinc finger, PHD-type IPR009255; Transcriptional coactivation IPR019787; Zinc finger, PHD-finger
			JC_C100023306	Leucine-rich repeat IPR003590; Leucine-rich repeat, ribonuclease inhibitor subtype IPR006553; Leucine-rich repeat, cysteine-containing subtype
			JC_C100019676	-
			JC_C100022853	-
			JC_C100003818	Amidase IPR001440; Tetratricopeptide TPR-1 IPR013026; Tetratricopeptide region IPR019734; Tetratricopeptide repeat
			JC_C100010487	Zinc finger, RING-type
			JC_C100006925	Pentatricopeptide repeat
			JC_C100019143	-
			JC_C100020323	GO:0034357
			JC_C100016026	C2 calcium-dependent membrane targeting IPR008973; C2 calcium/lipid-binding region, CaLB
			JC_C100016716	Basic-leucine zipper (bZIP) transcription factor IPR011700; Basic leucine zipper
			JC_C100005315	-
			JC_C100019888	Zinc finger, RING-type IPR018957; Zinc finger, C3HC4 RING-type
			JC_C100012120	UDP-glucuronosyl/UDP-glucosyltransferase
			JC_C100013453	Alpha/beta hydrolase fold-1
			JC_C100019229	Heat shock protein DnaJ, N-terminal
			JC_C100021736	HNH endonuclease
			JC_C100018570	Dual specificity phosphatase, catalytic domain IPR000387; Dual-specific/protein-tyrosine phosphatase, conserved region IPR011009; Protein kinase-like domain IPR015275; Actin-fragmin kinase, catalytic IPR020422; Dual specificity phosphatase, subgroup, catalytic domain
			JC_C100003627	GO:0009536//plastid
			JC_C100013382	Leucine-rich repeat IPR002182; NB-ARC
			JC_C100019656	Inositol monophosphatase
			JC_C100026205	GO:0044464//cell part
			JC_C100027759	Pentatricopeptide repeat
			JC_C100022961	-
			JC_C100025082	von Willebrand factor, type A
			JC_C100021628	Phosphatidylinositol 3-/4-kinase, catalytic IPR003152; PIK-related kinase, FATC IPR011009; Protein kinase-like domain IPR014009; PIK-related kinase
			JC_C100001396	Protein of unknown function DUF1022
			JC_C100015234	Cell division cycle-associated protein
			JC_C100013736	Ribosomal protein L1
			JC_C100009342	Protein kinase, catalytic domain IPR001611; Leucine-rich repeat IPR002290; Serine/threonine-protein kinase domain IPR003591; Leucine-rich repeat, typical subtype IPR011009; Protein kinase-like domain IPR013210; Leucine-rich repeat, N-terminal IPR017442; Serine/threonine-protein kinase-like domain IPR020635; Tyrosine-protein kinase, subgroup, catalytic domain
			JC_C100017264	-
			JC_C100010829	Zinc finger, RING-type IPR018957; Zinc finger, C3HC4 RING-type
			JC_C100005013	Heat shock protein DnaJ, N-terminal
			JC_C100008833	GTP-binding protein, HSR1-related
			JC_C100003662	Kinesin, motor region
			JC_C100020420	Remorin, C-terminal
			JC_C100025081	Protein of unknown function DUF231, plant
			JC_C100006782	Importin-beta, N-terminal IPR016024; Armadillo-type fold
			JC_C100010905	Protein kinase, catalytic domain IPR002290; Serine/threonine-protein kinase domain IPR011009; Protein kinase-like domain IPR017442; Serine/threonine-protein kinase-like domain
			JC_C100009401	Alpha/beta hydrolase fold-1
			JC_C100021876	Exodeoxyribonuclease III xth IPR005135; Endonuclease/exonuclease/phosphatase
			JC_C100011795	FAS1 domain
			JC_C100021906	Protein kinase, catalytic domain IPR002290; Serine/threonine-protein kinase domain IPR011009; Protein kinase-like domain IPR017442; Serine/threonine-protein kinase-like domain IPR020635; Tyrosine-protein kinase, subgroup, catalytic domain
			JC_C100013189	AMP-dependent synthetase/ligase
			JC_C100025873	-
			JC_C100009369	-
			JC_C100025697	Peptidase C12, ubiquitin carboxyl-terminal hydrolase 1
			JC_C100001014	Retrotransposon gag protein
			JC_C100003695	FBD
			JC_C100005843	Pentatricopeptide repeat
			JC_C100013840	ABC transporter-like IPR003593; ATPase, AAA+ type, core IPR013525; ABC-2 type transporter IPR013581; Plant PDR ABC transporter associated
			JC_C100022183	-
			JC_C100006722	Protein of unknown function DUF250
			JC_C100015161	Dynamin central region IPR001401; Dynamin, GTPase region IPR003130; Dynamin GTPase effector IPR020850; GTPase effector domain, GED
			JC_C100022508	-
			JC_C100008223	Histone chaperone, ASF1-like
			JC_C100012307	Zinc finger, RING-type IPR018957; Zinc finger, C3HC4 RING-type
			JC_C100024365	Pectinacetylesterase
			JC_C100016872	Harpin-induced 1
			JC_C100026641	Mitochondrial substrate carrier IPR018108; Mitochondrial substrate/solute carrier
			JC_C100004648	Armadillo IPR003613; U box domain IPR016024; Armadillo-type fold
			JC_C100008761	Pentatricopeptide repeat
			JC_C100023650	-
			JC_C100019178	Protein kinase, catalytic domain IPR002290; Serine/threonine-protein kinase domain IPR011009; Protein kinase-like domain IPR017442; Serine/threonine-protein kinase-like domain IPR020635; Tyrosine-protein kinase, subgroup, catalytic domain
			JC_C100016113	Inositol monophosphatase
			JC_C100016702	-
			JC_C100007006	Signal transduction response regulator, receiver region IPR003594; ATP-binding region, ATPase-like IPR003661; Signal transduction histidine kinase, subgroup 1, dimerisation/phosphoacceptor region IPR005467; Signal transduction histidine kinase, core IPR006189; CHASE IPR009082; Signal transduction histidine kinase, homodimeric IPR011006; CheY-like
			JC_C100018822	Mog1/PsbP/DUF1795, alpha/beta/alpha sandwich
			JC_C100010447	-
			JC_C100013112	Rad21/Rec8 like protein, C-terminal IPR006910; Rad21/Rec8 like protein, N-terminal
			JC_C100018869	Protein of unknown function DUF868, plant
			JC_C100019837	-
			JC_C100018546	GO:0043231//intracellular membrane-bounded organelle
			JC_C100011295	Protein of unknown function DUF620
			JC_C100005253	Cyclin-like F-box IPR006652; Kelch repeat type 1 IPR011043; Galactose oxidase/kelch, beta-propeller
			JC_C100022967	-
			JC_C100022478	t-SNARE IPR015260; Syntaxin 6, N-terminal
			JC_C100010635	AMP-dependent synthetase/ligase
			JC_C100016124	-
			JC_C100017597	GO:0016020//membrane
			JC_C100026291	Zinc finger, RING-type IPR018957; Zinc finger, C3HC4 RING-type
			JC_C100026684	-
			JC_C100007847	-
			JC_C100007670	Glycosyl transferase, family 48
			JC_C100020140	6-phosphogluconate dehydrogenase, NAD-binding IPR008927; 6-phosphogluconate dehydrogenase, C-terminal-like IPR016040; NAD(P)-binding domain
			JC_C100023936	Exoribonuclease, phosphorolytic domain 1 IPR020568; Ribosomal protein S5 domain 2-type fold
			JC_C100029479	GO:0034357;GO:0009534//chloroplast thylakoid
			JC_C100003251	GO:0009532//plastid stroma
			JC_C100020573	Aminotransferase, class I/II IPR013216; Methyltransferase type 11 IPR015424; Pyridoxal phosphate-dependent transferase, major region
			JC_C100009014	Aminoacyl-tRNA synthetase, class II (G/ H/ P/ S), conserved region IPR004154; Anticodon-binding IPR006195; Aminoacyl-tRNA synthetase, class II, conserved region IPR012947; Threonyl/alanyl tRNA synthetase, SAD IPR018163; Threonyl/alanyl tRNA synthetase, class II-like, putative editing domain
			JC_C100003364	ABC transporter-like IPR003593; ATPase, AAA+ type, core IPR010509; ABC transporter, N-terminal IPR011527; ABC transporter, transmembrane region, type 1 IPR017940; ABC transporter integral membrane type 1
			JC_C100007131	-
			JC_C100023638	Haloacid dehalogenase-like hydrolase
			JC_C100016103	Carbohydrate kinase, FGGY, N-terminal IPR018485; Carbohydrate kinase, FGGY, C-terminal
			JC_C100012861	ATPase, AAA+ type, core
			JC_C100000769	UDP-glucuronosyl/UDP-glucosyltransferase
			JC_C100007208	-
			JC_C100026034	Amidohydrolase 1 IPR011059; Metal-dependent hydrolase, composite domain
			JC_C100017140	Glycoside hydrolase, family 37 IPR008928; Six-hairpin glycosidase-like
			JC_C100018226	Cyclin-like F-box
			JC_C100014619	-
			JC_C100017747	Protein of unknown function DUF869, plant
			JC_C100021106	Major intrinsic protein
			JC_C100016495	Alpha/beta hydrolase fold-1
			JC_C100020146	Beta-lactamase-like
			JC_C100013275	NAD(P)-binding domain IPR020828; Glyceraldehyde 3-phosphate dehydrogenase, NAD(P) binding domain IPR020829; Glyceraldehyde 3-phosphate dehydrogenase, catalytic domain
			JC_C100013355	tRNA methyltransferase complex GCD14 subunit
			JC_C100022694	Protein of unknown function DUF246, plant
			JC_C100017202	GO:0016020//membrane;GO:0009536//plastid
			JC_C100022601	GO:0044464//cell part
			JC_C100011253	PetM of cytochrome b6/f complex subunit 7
			JC_C100017623	Methyltransferase type 11
			JC_C100020132	Protein kinase, catalytic domain IPR002290; Serine/threonine-protein kinase domain IPR011009; Protein kinase-like domain IPR017442; Serine/threonine-protein kinase-like domain IPR020635; Tyrosine-protein kinase, subgroup, catalytic domain
			JC_C100022602	Zinc finger, DHHC-type
			JC_C100000134	WD40 repeat IPR011046; WD40 repeat-like-containing domain IPR017986; WD40-repeat-containing domain IPR019781; WD40 repeat, subgroup IPR019782; WD40 repeat 2
			JC_C100018786	DNA/RNA helicase, C-terminal IPR011545; DNA/RNA helicase, DEAD/DEAH box type, N-terminal IPR014021; Helicase, superfamily 1/2, ATP-binding domain
			JC_C100021243	Protein of unknown function DUF966
			JC_C100022084	FAD dependent oxidoreductase
			JC_C100004881	Transcription factor, FAR1-related
			JC_C100026806	Signal transduction response regulator, receiver region IPR011006; CheY-like
			JC_C100015170	RNA recognition motif, RNP-1 IPR007855; RNA-dependent RNA polymerase, eukaryotic-type
			JC_C100016725	Protein of unknown function DUF641, plant
			JC_C100002010	Glycosyl transferase, group 1 IPR013534; Starch synthase catalytic region
			JC_C100020151	Protein kinase, catalytic domain IPR002290; Serine/threonine-protein kinase domain IPR011009; Protein kinase-like domain IPR017442; Serine/threonine-protein kinase-like domain IPR020635; Tyrosine-protein kinase, subgroup, catalytic domain
			JC_C100019367	Cyclin-like F-box
			JC_C100009156	Protein kinase, catalytic domain IPR001611; Leucine-rich repeat IPR002290; Serine/threonine-protein kinase domain IPR003591; Leucine-rich repeat, typical subtype IPR011009; Protein kinase-like domain IPR017442; Serine/threonine-protein kinase-like domain IPR020635; Tyrosine-protein kinase, subgroup, catalytic domain
			JC_C100031097	Blue (type 1) copper domain IPR008972; Cupredoxin
			JC_C100017625	Basic helix-loop-helix dimerisation region bHLH IPR011598; Helix-loop-helix DNA-binding
			JC_C100013041	Transcriptional factor B3
			JC_C100003882	-
			JC_C100002820	Chlorophyll A-B binding protein
			JC_C100013698	Oligopeptide transporter IPR016196; Major facilitator superfamily, general substrate transporter
			JC_C100026060	WD40 repeat IPR011046; WD40 repeat-like-containing domain IPR017986; WD40-repeat-containing domain IPR019781; WD40 repeat, subgroup IPR019782; WD40 repeat 2
			JC_C100006218	-
			JC_C100019183	-
			JC_C100006394	Ferredoxin
			JC_C100013764	Inosine/uridine-preferring nucleoside hydrolase
			JC_C100014056	Protein kinase, catalytic domain IPR002290; Serine/threonine-protein kinase domain IPR002896; Herpesvirus glycoprotein D IPR011009; Protein kinase-like domain IPR017442; Serine/threonine-protein kinase-like domain IPR020635; Tyrosine-protein kinase, subgroup, catalytic domain
			JC_C100021488	-
			JC_C100008559	Protein of unknown function DUF266, plant
			JC_C100019214	Protein of unknown function DUF1068
			JC_C100021771	Mitochodrial transcription termination factor-related
			JC_C100020716	Acid phosphatase (Class B)
			JC_C100008443	Glyoxalase/bleomycin resistance protein/dioxygenase
			JC_C100005100	DNA-binding WRKY
			JC_C100006824	Multi antimicrobial extrusion protein MatE
			JC_C100011297	Protein of unknown function DUF1195
			JC_C100002672	Short-chain dehydrogenase/reductase SDR IPR016040; NAD(P)-binding domain
			JC_C100013984	GRAS transcription factor
			JC_C100012663	NAD(P)-binding domain
			JC_C100012673	Protein of unknown function DUF566
			JC_C100023582	Transcription factor, SBP-box
			JC_C100022923	Pectate lyase/Amb allergen IPR011050; Pectin lyase fold/virulence factor
			JC_C100009561	Yippee-like protein
			JC_C100017125	Glycosyl transferase, family 31
			JC_C100008467	Glucosylceramidase IPR008928; Six-hairpin glycosidase-like
			JC_C100017660	Photosystem II manganese-stabilising protein PsbO
			JC_C100001321	Synaptobrevin IPR010908; Longin IPR011012; Longin-like
			JC_C100026472	Multicopper oxidase, type 1 IPR008972; Cupredoxin IPR011706; Multicopper oxidase, type 2 IPR011707; Multicopper oxidase, type 3
			JC_C100024924	Dynein light chain, type 1/2
			JC_C100001274	Protein kinase, catalytic domain IPR001245; Tyrosine-protein kinase, catalytic domain IPR002290; Serine/threonine-protein kinase domain IPR002912; Amino acid-binding ACT IPR011009; Protein kinase-like domain IPR020635; Tyrosine-protein kinase, subgroup, catalytic domain
			JC_C100024986	Pectinesterase, catalytic IPR011050; Pectin lyase fold/virulence factor
			JC_C100000531	Peptidase A1 IPR009007; Peptidase aspartic, catalytic
			JC_C100019078	Inorganic H+ pyrophosphatase
			JC_C100029780	ABC transporter-like IPR003593; ATPase, AAA+ type, core IPR013525; ABC-2 type transporter
			JC_C100025630	DENN IPR005112; dDENN
			JC_C100023619	Peptidase S10, serine carboxypeptidase
			JC_C100006153	Protein kinase, catalytic domain IPR001611; Leucine-rich repeat IPR002290; Serine/threonine-protein kinase domain IPR003591; Leucine-rich repeat, typical subtype IPR011009; Protein kinase-like domain IPR017442; Serine/threonine-protein kinase-like domain IPR020635; Tyrosine-protein kinase, subgroup, catalytic domain
			JC_C100012694	Ras small GTPase, Rab type IPR006687; GTP-binding protein SAR1 IPR006688; ADP-ribosylation factor IPR006689; ARF/SAR superfamily
			JC_C100023547	NAD(P)-binding domain IPR020828; Glyceraldehyde 3-phosphate dehydrogenase, NAD(P) binding domain IPR020829; Glyceraldehyde 3-phosphate dehydrogenase, catalytic domain
			JC_C100018966	Exostosin-like
			JC_C100022701	-
			JC_C100007195	Cytochrome P450
			JC_C100026033	Fatty acid desaturase, type 1 IPR013866; Sphingolipid delta4-desaturase, N-terminal
			JC_C100003144	Protein of unknown function DUF702
			JC_C100026283	Protein of unknown function DUF231, plant
			JC_C100018065	Peptidase S54, rhomboid
			JC_C100019127	Pectinesterase inhibitor
			JC_C100015722	Homeobox IPR002913; Lipid-binding START IPR009057; Homeodomain-like IPR013978; MEKHLA
			JC_C100020900	Protein of unknown function DUF231, plant
			JC_C100025723	Mechanosensitive ion channel MscS IPR010920; Like-Sm ribonucleoprotein-related, core
			JC_C100012863	UspA
			JC_C100005981	Cellular retinaldehyde-binding/triple function, C-terminal
			JC_C100018583	Uncharacterised protein family UPF0497, trans-membrane plant
			JC_C100009178	Protein of unknown function DUF593
			JC_C100005973	Ankyrin repeat IPR020683; Ankyrin repeat-containing domain
			JC_C100015690	FAD linked oxidase, N-terminal IPR012951; Berberine/berberine-like IPR016166; FAD-binding, type 2
			JC_C100003896	Protein kinase, catalytic domain IPR001245; Tyrosine-protein kinase, catalytic domain IPR001611; Leucine-rich repeat IPR002290; Serine/threonine-protein kinase domain IPR011009; Protein kinase-like domain IPR013210; Leucine-rich repeat, N-terminal IPR020635; Tyrosine-protein kinase, subgroup, catalytic domain
			JC_C100026501	PAK-box/P21-Rho-binding
			JC_C100012868	-
			JC_C100023318	Protein kinase, catalytic domain IPR002290; Serine/threonine-protein kinase domain IPR011009; Protein kinase-like domain IPR017442; Serine/threonine-protein kinase-like domain IPR020635; Tyrosine-protein kinase, subgroup, catalytic domain
			JC_C100010815	Glutathione S-transferase, N-terminal IPR004046; Glutathione S-transferase, C-terminal IPR010987; Glutathione S-transferase, C-terminal-like IPR012336; Thioredoxin-like fold IPR017933; Glutathione S-transferase/chloride channel, C-terminal
			JC_C100033831	Protein of unknown function DUF250
			JC_C100017997	-
			JC_C100010426	Bicarbonate transporter, C-terminal
			JC_C100003139	Zinc finger, GATA-type
			JC_C100034604	ABC transporter-like IPR003593; ATPase, AAA+ type, core IPR013525; ABC-2 type transporter
			JC_C100012679	Glycoside hydrolase, family 3, N-terminal IPR002772; Glycoside hydrolase, family 3, C-terminal IPR017853; Glycoside hydrolase, catalytic core
			JC_C100006772	Gamma interferon inducible lysosomal thiol reductase GILT
			JC_C100025644	Sodium/calcium exchanger membrane region
			JC_C100020849	Protein of unknown function DUF455
			JC_C100013394	Hus1-like protein
			JC_C100009038	Oligopeptide transporter IPR016196; Major facilitator superfamily, general substrate transporter
			JC_C100026427	Leucine-rich repeat IPR013210; Leucine-rich repeat, N-terminal
			JC_C100007911	Glycosyl transferase, family 8
			JC_C100007842	Cyclic nucleotide-binding IPR005821; Ion transport IPR018490; Cyclic nucleotide-binding-like
			JC_C100011016	Cyclin-like F-box IPR011043; Galactose oxidase/kelch, beta-propeller IPR011498; Kelch repeat type 2
			JC_C100000176	-
			JC_C100021783	Glycosyl transferase, family 8
			JC_C100001733	Pentatricopeptide repeat
			JC_C100032106	Protein of unknown function DUF641, plant
			JC_C100016274	CCAAT-binding factor
			JC_C100016322	-
			JC_C100017855	-
			JC_C100018527	ATPase, AAA+ type, core IPR003959; ATPase, AAA-type, core IPR004176; Clp, N-terminal IPR013093; ATPase associated with various cellular activities, AAA-2 IPR019489; Clp ATPase, C-terminal
			JC_C100016733	UDP-glucuronosyl/UDP-glucosyltransferase
			JC_C100010173	-
			JC_C100020383	MAP65/ASE1
			JC_C100006437	Pentatricopeptide repeat
			JC_C100007602	Zinc finger, RING-type IPR018957; Zinc finger, C3HC4 RING-type
			JC_C100008129	HEAT IPR016024; Armadillo-type fold
			JC_C100007631	-
			JC_C100013277	Cyclin-like F-box
			JC_C100020102	Sodium/calcium exchanger membrane region
			JC_C100025371	-
			JC_C100014331	GCK
			JC_C100009112	-
			JC_C100007623	Protein of unknown function DUF2363
			JC_C100019662	-
			JC_C100015154	Oxoglutarate/iron-dependent oxygenase
			JC_C100002960	Exocyst complex component Sec6
			JC_C100010619	Bromodomain
			JC_C100014494	Protein of unknown function DUF2215
			JC_C100016030	Ovarian tumour, otubain
			JC_C100015092	Pentatricopeptide repeat
			JC_C100032242	Amine oxidase IPR007526; SWIRM
			JC_C100022077	Zinc finger, RING-type IPR003111; Peptidase S16, lon N-terminal IPR018957; Zinc finger, C3HC4 RING-type IPR019734; Tetratricopeptide repeat
			JC_C100021635	Protein kinase, catalytic domain IPR001245; Tyrosine-protein kinase, catalytic domain IPR002290; Serine/threonine-protein kinase domain IPR011009; Protein kinase-like domain IPR020635; Tyrosine-protein kinase, subgroup, catalytic domain
			JC_C100032768	ZF-HD homeobox protein Cys/His-rich dimerisation region
			JC_C100017957	PWWP IPR001214; SET IPR001965; Zinc finger, PHD-type IPR003616; Post-SET zinc-binding region IPR011011; Zinc finger, FYVE/PHD-type IPR019787; Zinc finger, PHD-finger
			JC_C100015061	Carotenoid oxygenase
			JC_C100011634	GO:0043231//intracellular membrane-bounded organelle
			JC_C100021554	Pectate lyase/Amb allergen IPR011050; Pectin lyase fold/virulence factor
			JC_C100013055	GO:0043231//intracellular membrane-bounded organelle
			JC_C100007276	Protein of unknown function DUF246, plant
			JC_C100003912	Basic-leucine zipper (bZIP) transcription factor IPR011616; bZIP transcription factor, bZIP-1
			JC_C100015882	Amino acid permease-associated region
			JC_C100013880	Cyclin-like F-box IPR006652; Kelch repeat type 1 IPR011043; Galactose oxidase/kelch, beta-propeller
			JC_C100025452	DNA mismatch repair protein MutS, C-terminal IPR007695; DNA mismatch repair protein MutS-like, N-terminal IPR007696; DNA mismatch repair protein MutS, core IPR007860; DNA mismatch repair protein MutS, connector IPR016151; DNA mismatch repair protein MutS, N-terminal
			JC_C100006509	Nuclear control of ATP synthase 2
			JC_C100010770	Zinc finger, DHHC-type
			JC_C100032971	FAD linked oxidase, N-terminal IPR012951; Berberine/berberine-like IPR016166; FAD-binding, type 2
			JC_C100009073	Protein of unknown function DUF250
			JC_C100024060	Protein kinase, catalytic domain IPR002290; Serine/threonine-protein kinase domain IPR011009; Protein kinase-like domain IPR017442; Serine/threonine-protein kinase-like domain IPR020635; Tyrosine-protein kinase, subgroup, catalytic domain
			JC_C100012191	-
			JC_C100021054	-
			JC_C100021724	Pentatricopeptide repeat
			JC_C100000090	HAD-superfamily hydrolase, subfamily IE
			JC_C100011271	Protein kinase, catalytic domain IPR002290; Serine/threonine-protein kinase domain IPR011009; Protein kinase-like domain IPR017442; Serine/threonine-protein kinase-like domain IPR020635; Tyrosine-protein kinase, subgroup, catalytic domain
			JC_C100025577	-
			JC_C100011237	Protein of unknown function DUF617, plant
			JC_C100009842	-
			JC_C100009796	Transcription factor, FAR1-related
			JC_C100013760	WD40 repeat IPR011046; WD40 repeat-like-containing domain IPR017956; AT hook, DNA-binding motif IPR019781; WD40 repeat, subgroup
			JC_C100007209	Pollen Ole e 1 allergen/extensin
			JC_C100002882	Like-Sm ribonucleoprotein, core IPR006649; Like-Sm ribonucleoprotein, core domain, eukaryotic/archaea-type IPR010920; Like-Sm ribonucleoprotein-related, core
			JC_C100006835	-
			JC_C100012900	Protein kinase, catalytic domain IPR001680; WD40 repeat IPR001841; Zinc finger, RING-type IPR011009; Protein kinase-like domain IPR011046; WD40 repeat-like-containing domain IPR017986; WD40-repeat-containing domain IPR018957; Zinc finger, C3HC4 RING-type IPR019781; WD40 repeat, subgroup IPR019782; WD40 repeat 2
			JC_C100017534	Haem peroxidase, plant/fungal/bacterial IPR010255; Haem peroxidase
			JC_C100021132	Ovarian tumour, otubain
			JC_C100009418	Protein of unknown function DUF341
			JC_C100006865	Actin-binding, cofilin/tropomyosin type
			JC_C100025485	Pentatricopeptide repeat
			JC_C100022758	GO:0044464//cell part
			JC_C100004053	-
			JC_C100001147	Glycoside hydrolase, family 3, N-terminal IPR002772; Glycoside hydrolase, family 3, C-terminal IPR017853; Glycoside hydrolase, catalytic core
			JC_C100023364	Zinc finger, RING-type IPR002110; Ankyrin repeat IPR020683; Ankyrin repeat-containing domain
			JC_C100004396	ATPase, AAA+ type, core IPR003959; ATPase, AAA-type, core
			JC_C100005941	Ionotropic glutamate receptor IPR001828; Extracellular ligand-binding receptor
			JC_C100026008	-
			JC_C100019312	Transposase, MuDR, plant IPR006564; Zinc finger, PMZ-type IPR007527; Zinc finger, SWIM-type IPR018289; MULE transposase, conserved domain
			JC_C100021146	Protein kinase, catalytic domain IPR002290; Serine/threonine-protein kinase domain IPR011009; Protein kinase-like domain IPR017442; Serine/threonine-protein kinase-like domain IPR020635; Tyrosine-protein kinase, subgroup, catalytic domain
			JC_C100025150	Zinc finger, RING-type IPR001878; Zinc finger, CCHC-type IPR014891; DWNN domain IPR018957; Zinc finger, C3HC4 RING-type
			JC_C100020721	Zinc finger, RING-CH-type IPR018957; Zinc finger, C3HC4 RING-type
			JC_C100022971	-
			JC_C100010506	Dynamin central region IPR001401; Dynamin, GTPase region IPR003130; Dynamin GTPase effector IPR020850; GTPase effector domain, GED
			JC_C100021258	Zinc finger, Dof-type
			JC_C100004739	Peptidase C12, ubiquitin carboxyl-terminal hydrolase 1
			JC_C100009855	Cyclin-like F-box IPR006553; Leucine-rich repeat, cysteine-containing subtype
			JC_C100007798	-
			JC_C100023086	Lipase, GDSL
			JC_C100017834	Protein of unknown function DUF2215
			JC_C100018376	Chromo domain IPR016197; Chromo domain-like
			JC_C100019162	-
			JC_C100001300	Phytochrome chromophore attachment domain
			JC_C100023548	-
			JC_C100013239	Transcription factor, enhancer of yellow 2
			JC_C100017056	Armadillo IPR001752; Kinesin, motor region IPR016024; Armadillo-type fold
			JC_C100005464	RNA recognition motif, RNP-1 IPR001878; Zinc finger, CCHC-type
			JC_C100012972	Protein of unknown function DUF246, plant
			JC_C100013901	Ribosomal protein L36
			JC_C100017383	Low density lipoprotein-receptor, class A, cysteine-rich
			JC_C100008428	Protein of unknown function DUF632 IPR006868; Protein of unknown function DUF630
			JC_C100019009	WW/Rsp5/WWP
			JC_C100004013	GO:0043231//intracellular membrane-bounded organelle
			JC_C100008274	SANT, DNA-binding IPR009057; Homeodomain-like IPR014778; Myb, DNA-binding IPR017930; Myb-type HTH DNA-binding domain
			JC_C100010066	Tat binding protein 1-interacting
			JC_C100006198	-
			JC_C100014156	Toll-Interleukin receptor IPR002182; NB-ARC
			JC_C100011504	Chloroplast protein import component , Ti20-like
			JC_C100026071	Leucine-rich repeat
			JC_C100005055	3-dehydroquinate synthase AroB
			JC_C100020256	UbiA prenyltransferase
			JC_C100001085	-
			JC_C100005127	-
			JC_C100013381	Protein kinase, catalytic domain IPR001611; Leucine-rich repeat IPR002182; NB-ARC IPR002290; Serine/threonine-protein kinase domain IPR003593; ATPase, AAA+ type, core IPR011009; Protein kinase-like domain IPR017442; Serine/threonine-protein kinase-like domain IPR020635; Tyrosine-protein kinase, subgroup, catalytic domain
			JC_C100020914	-
			JC_C100021569	Metallophosphoesterase
			JC_C100016810	HEAT IPR016024; Armadillo-type fold
			JC_C100020223	HEAT IPR016024; Armadillo-type fold
			JC_C100025605	Survival protein SurE-like phosphatase/nucleotidase
			JC_C100017001	GO:0016020//membrane
			JC_C100022678	Protein of unknown function DUF343
			JC_C100012844	Camphor resistance CrcB protein
			JC_C100011235	Protein of unknown function DUF547
			JC_C100025495	WD40 repeat IPR011046; WD40 repeat-like-containing domain IPR017986; WD40-repeat-containing domain IPR019781; WD40 repeat, subgroup IPR019782; WD40 repeat 2
			JC_C100020514	Protein kinase, catalytic domain IPR002290; Serine/threonine-protein kinase domain IPR011009; Protein kinase-like domain IPR017442; Serine/threonine-protein kinase-like domain IPR020635; Tyrosine-protein kinase, subgroup, catalytic domain
			JC_C100004907	NB-ARC
			JC_C100026290	-
			JC_C100023883	GHMP kinase IPR012887; L-fucokinase IPR013750; GHMP kinase, C-terminal IPR020568; Ribosomal protein S5 domain 2-type fold
			JC_C100013975	NUDIX hydrolase domain IPR015797; NUDIX hydrolase domain-like
			JC_C100017449	Leucine-rich repeat IPR002182; NB-ARC IPR008808; Mildew-resistance, broad-spectrum IPR014011; Disease resistance, plant
			JC_C100002567	-
			JC_C100010720	Transcription factor E2F/dimerisation partner (TDP)
			JC_C100018529	Forkhead-associated IPR008984; SMAD/FHA domain IPR014905; HIP116, Rad5p N-terminal
			JC_C100002297	Basic-leucine zipper (bZIP) transcription factor IPR011616; bZIP transcription factor, bZIP-1 IPR012900; G-box binding, MFMR
			JC_C100000878	Ferredoxin
			JC_C100009362	Heat shock factor (HSF)-type, DNA-binding
			JC_C100000466	Tetratricopeptide TPR-1 IPR012336; Thioredoxin-like fold IPR013026; Tetratricopeptide region IPR013105; Tetratricopeptide TPR2 IPR013766; Thioredoxin domain IPR019734; Tetratricopeptide repeat
			JC_C100012405	Ran GTPase IPR003577; Ras small GTPase, Ras type IPR003578; Ras small GTPase, Rho type IPR003579; Ras small GTPase, Rab type IPR006688; ADP-ribosylation factor IPR013753; Ras
			JC_C100002635	GO:0009534//chloroplast thylakoid;GO:0016020//membrane
			JC_C100026296	Cyclin-like F-box IPR006652; Kelch repeat type 1 IPR011043; Galactose oxidase/kelch, beta-propeller
			JC_C100012615	Protein kinase, catalytic domain IPR002290; Serine/threonine-protein kinase domain IPR011009; Protein kinase-like domain IPR017442; Serine/threonine-protein kinase-like domain IPR020635; Tyrosine-protein kinase, subgroup, catalytic domain
			JC_C100023276	-
			JC_C100026373	Patatin IPR016035; Acyl transferase/acyl hydrolase/lysophospholipase
			JC_C100001461	ENTH/VHS IPR018610; Protein of unknown function DUF2043
			JC_C100014193	-
			JC_C100009538	PHF5-like
			JC_C100022700	RNA recognition motif, RNP-1
			JC_C100018250	Aldehyde dehydrogenase IPR016161; Aldehyde/histidinol dehydrogenase
			JC_C100026820	Xanthine/uracil/vitamin C permease
			JC_C100002195	Mitochondrial matrix Mmp37
			JC_C100004514	-
			JC_C100022926	-
			JC_C100023356	Protein kinase, catalytic domain IPR000961; AGC-kinase, C-terminal IPR002290; Serine/threonine-protein kinase domain IPR011009; Protein kinase-like domain IPR017442; Serine/threonine-protein kinase-like domain IPR017892; Protein kinase, C-terminal IPR020635; Tyrosine-protein kinase, subgroup, catalytic domain
			JC_C100019898	Pentatricopeptide repeat
			JC_C100000255	Pentatricopeptide repeat
			JC_C100023422	Fumble
			JC_C100001561	Beta-N-acetylhexosaminidase-like IPR015883; Glycoside hydrolase, family 20, catalytic core IPR017853; Glycoside hydrolase, catalytic core
			JC_C100017254	RNAse P, Rpr2/Rpp21 subunit
			JC_C100008445	Bromodomain IPR004252; Transposase, Ptta/En/Spm, plant IPR017956; AT hook, DNA-binding motif
			JC_C100014846	Zinc finger, RING-CH-type IPR018957; Zinc finger, C3HC4 RING-type
			JC_C100016496	Pentatricopeptide repeat
			JC_C100014100	-
			JC_C100015503	NHL repeat
			JC_C100004507	Mitochondrial substrate carrier IPR018108; Mitochondrial substrate/solute carrier
			JC_C100015594	Protein of unknown function DUF833
			JC_C100006107	Pentatricopeptide repeat
			JC_C100017044	Protein of unknown function DUF250
			JC_C100016602	Glycoside hydrolase, family 17 IPR012946; X8 IPR017853; Glycoside hydrolase, catalytic core
			JC_C100009260	Protein of unknown function DUF566
			JC_C100011089	Alkyl hydroperoxide reductase/ Thiol specific antioxidant/ Mal allergen IPR012336; Thioredoxin-like fold IPR017936; Thioredoxin-like
			JC_C100003242	Nnf1
			JC_C100000606	Ribonuclease H2, subunit C
			JC_C100005027	Methyltransferase-16, putative
			JC_C100012821	Heat shock protein DnaJ, N-terminal
			JC_C100006367	Oxoglutarate/iron-dependent oxygenase
			JC_C100022380	CHCH
			JC_C100025633	Protein of unknown function DUF246, plant
			JC_C100021375	Zinc finger, C2H2-type IPR015880; Zinc finger, C2H2-like
			JC_C100013615	Zinc finger, RanBP2-type
			JC_C100023239	Glycoside hydrolase, family 1 IPR017853; Glycoside hydrolase, catalytic core
			JC_C100019210	Protein of unknown function DUF477
			JC_C100002422	Zinc finger, RING-CH-type IPR018957; Zinc finger, C3HC4 RING-type
			JC_C100017826	ATPase, P-type cation-transporter, N-terminal IPR005834; Haloacid dehalogenase-like hydrolase IPR006068; ATPase, P-type cation-transporter, C-terminal IPR008250; ATPase, P-type, ATPase-associated region
			JC_C100015586	-
			JC_C100003378	Ribonuclease P-related
			JC_C100024253	Exocyst complex subunit Sec15-like
			JC_C100003974	GO:0009536//plastid
			JC_C100020922	Lipase, GDSL IPR013830; Esterase, SGNH hydrolase-type
			JC_C100005307	tRNA isopentenyltransferase
			JC_C100001571	Zinc finger, RING-type IPR018957; Zinc finger, C3HC4 RING-type
			JC_C100007595	Pentatricopeptide repeat
			JC_C100019011	GO:0044424//intracellular part
			JC_C100017738	Basic helix-loop-helix dimerisation region bHLH IPR011598; Helix-loop-helix DNA-binding
			JC_C100004686	Protein of unknown function DUF1475
			JC_C100003836	Glycosyl transferase, family 48
			JC_C100026678	D-tyrosyl-tRNA(Tyr) deacylase
			JC_C100023545	Pentatricopeptide repeat
			JC_C100005992	Bacterial transferase hexapeptide repeat IPR010493; Serine acetyltransferase, N-terminal IPR011004; Trimeric LpxA-like
			JC_C100017995	ATPase, AAA+ type, core IPR003959; ATPase, AAA-type, core
			JC_C100023834	O-methyltransferase, family 3
			JC_C100005002	Peptidase A1 IPR009007; Peptidase aspartic, catalytic
			JC_C100013395	Pentatricopeptide repeat
			JC_C100014318	Cyclin-like F-box
			JC_C100023540	-
			JC_C100014643	DNA/RNA helicase, C-terminal IPR011545; DNA/RNA helicase, DEAD/DEAH box type, N-terminal IPR014001; DEAD-like helicase, N-terminal IPR014014; RNA helicase, DEAD-box type, Q motif IPR014021; Helicase, superfamily 1/2, ATP-binding domain
			JC_C100024048	Calcium-binding EF-hand IPR002123; Phospholipid/glycerol acyltransferase IPR018248; EF-Hand domain IPR018249; EF-HAND 2
			JC_C100018550	Pentatricopeptide repeat
			JC_C100004528	Transcription factor jumonji/aspartyl beta-hydroxylase IPR003349; Transcription factor jumonji, JmjN IPR004198; Zinc finger, C5HC2-type IPR013129; Transcription factor jumonji
			JC_C100000485	Harpin-induced 1
			JC_C100004717	Zinc finger, MIZ-type
			JC_C100004712	Plastocyanin-like IPR008972; Cupredoxin
			JC_C100002704	Mitochodrial transcription termination factor-related
			JC_C100006985	ABC-1 IPR011009; Protein kinase-like domain
			JC_C100002510	Nse4
			JC_C100000259	-
			JC_C100016127	Aminotransferase, class I/II IPR015424; Pyridoxal phosphate-dependent transferase, major region
			JC_C100017422	Cold acclimation WCOR413
			JC_C100002091	Armadillo IPR003613; U box domain IPR016024; Armadillo-type fold
			JC_C100015475	Protein of unknown function DUF1645
			JC_C100014018	Pentatricopeptide repeat
			JC_C100001689	Pentatricopeptide repeat
			JC_C100014618	Protein of unknown function DUF1749
			JC_C100010503	Protein of unknown function DUF594
			JC_C100005343	-
			JC_C100018310	Glycosyl transferase, family 31
			JC_C100013843	Protein kinase, catalytic domain IPR001611; Leucine-rich repeat IPR002290; Serine/threonine-protein kinase domain IPR011009; Protein kinase-like domain IPR013210; Leucine-rich repeat, N-terminal IPR017442; Serine/threonine-protein kinase-like domain IPR020635; Tyrosine-protein kinase, subgroup, catalytic domain
			JC_C100018487	RNA polymerase III Rpc4
			JC_C100025738	Conserved hypothetical protein CHP00730
			JC_C100010953	-
			JC_C100022256	Protein kinase, catalytic domain IPR001611; Leucine-rich repeat IPR002290; Serine/threonine-protein kinase domain IPR003591; Leucine-rich repeat, typical subtype IPR011009; Protein kinase-like domain IPR013210; Leucine-rich repeat, N-terminal IPR017442; Serine/threonine-protein kinase-like domain IPR020635; Tyrosine-protein kinase, subgroup, catalytic domain
			JC_C100016948	BTB/POZ-like IPR003131; Potassium channel, voltage dependent, Kv, tetramerisation IPR011046; WD40 repeat-like-containing domain IPR011333; BTB/POZ fold
			JC_C100023886	WD40 repeat IPR011046; WD40 repeat-like-containing domain IPR017986; WD40-repeat-containing domain IPR019781; WD40 repeat, subgroup IPR019782; WD40 repeat 2
			JC_C100022616	Hemimethylated DNA-binding region
			JC_C100013902	-
			JC_C100024781	Zinc finger, B-box IPR010402; CCT domain
			JC_C100021205	Prephenate dehydratase IPR002912; Amino acid-binding ACT
			JC_C100021575	Pentatricopeptide repeat
			JC_C100004971	Toll-Interleukin receptor IPR002182; NB-ARC IPR011713; Leucine-rich repeat 3
			JC_C100014400	Heat shock factor (HSF)-type, DNA-binding
			JC_C100009956	Cyclic nucleotide-binding IPR005821; Ion transport IPR018490; Cyclic nucleotide-binding-like
			JC_C100001468	GO:0044464//cell part
			JC_C100014266	GroES-like IPR013154; Alcohol dehydrogenase GroES-like
			JC_C100023799	Class I peptide chain release factor IPR005139; Peptide chain release factor
			JC_C100017909	Multi antimicrobial extrusion protein MatE
			JC_C100020097	Tetratricopeptide TPR-1 IPR013026; Tetratricopeptide region
			JC_C100002328	Pentatricopeptide repeat
			JC_C100017098	-
			JC_C100010273	Oxoglutarate/iron-dependent oxygenase
			JC_C100016871	Phosphatidylinositol 3-/4-kinase, catalytic IPR000626; Ubiquitin IPR019955; Ubiquitin supergroup
			JC_C100003461	Smr protein/MutS2 C-terminal IPR002885; Pentatricopeptide repeat
			JC_C100008448	Bromodomain IPR004252; Transposase, Ptta/En/Spm, plant
			JC_C100001883	Protein of unknown function DUF1296
			JC_C100004182	ENT IPR014002; Tudor-like, plant
			JC_C100001953	Protein kinase, catalytic domain IPR002290; Serine/threonine-protein kinase domain IPR011009; Protein kinase-like domain IPR017442; Serine/threonine-protein kinase-like domain IPR020635; Tyrosine-protein kinase, subgroup, catalytic domain
			JC_C100003419	Aldo/keto reductase
			JC_C100023126	Monooxygenase, FAD-binding
			JC_C100025290	Tetratricopeptide TPR2
			JC_C100020883	Autophagy-related protein 27
			JC_C100009705	-
			JC_C100023229	-
			JC_C100010753	Auxin efflux carrier
			JC_C100022584	Cullin, N-terminal IPR014786; Anaphase promoting complex subunit 2 IPR016158; Cullin homology
			JC_C100011583	Protein of unknown function DUF2305
			JC_C100014332	Peptidase M50
			JC_C100024728	GO:0031410//cytoplasmic vesicle
			JC_C100009440	-
			JC_C100016019	DNA/RNA helicase, C-terminal IPR003711; Transcription factor CarD IPR011545; DNA/RNA helicase, DEAD/DEAH box type, N-terminal IPR014021; Helicase, superfamily 1/2, ATP-binding domain
			JC_C100004005	Protein of unknown function DUF246, plant
			JC_C100013285	DNA/RNA helicase, C-terminal IPR011545; DNA/RNA helicase, DEAD/DEAH box type, N-terminal IPR014001; DEAD-like helicase, N-terminal IPR014014; RNA helicase, DEAD-box type, Q motif IPR014021; Helicase, superfamily 1/2, ATP-binding domain
			JC_C100004916	RNA recognition motif, RNP-1 IPR012921; Spen paralogue and orthologue SPOC, C-terminal
			JC_C100012394	Amino acid-binding ACT
			JC_C100004411	Amino acid transporter, transmembrane
			JC_C100020975	Zinc finger, LIM-type
			JC_C100002112	Protein of unknown function DUF250
			JC_C100024632	NAD-dependent epimerase/dehydratase IPR016040; NAD(P)-binding domain
			JC_C100020311	Methyltransferase type 11
			JC_C100019809	-
			JC_C100026435	PAK-box/P21-Rho-binding IPR000198; RhoGAP IPR008936; Rho GTPase activation protein
			JC_C100014249	SANT, DNA-binding IPR009057; Homeodomain-like IPR017877; MYB-like
			JC_C100014427	Quinonprotein alcohol dehydrogenase-like
			JC_C100020394	Mitochodrial transcription termination factor-related
			JC_C100021571	Ribosomal protein L19
			JC_C100002048	Phospholipid/glycerol acyltransferase
			JC_C100013173	Pentatricopeptide repeat
			JC_C100002353	Protein kinase-like domain
			JC_C100026967	Protein kinase, catalytic domain IPR002290; Serine/threonine-protein kinase domain IPR011009; Protein kinase-like domain IPR017442; Serine/threonine-protein kinase-like domain IPR020635; Tyrosine-protein kinase, subgroup, catalytic domain
			JC_C100000394	Aminotransferase class-III IPR015424; Pyridoxal phosphate-dependent transferase, major region
			JC_C100016605	Leucine zipper, homeobox-associated
			JC_C100025744	NAD-dependent epimerase/dehydratase IPR016040; NAD(P)-binding domain
			JC_C100021616	GO:0044464//cell part
			JC_C100010145	-
			JC_C100023605	GYF
			JC_C100025913	DNA-binding WRKY
			JC_C100015439	Kinesin, motor region IPR009053; Prefoldin IPR010544; Kinesin-related
			JC_C100018854	Pentatricopeptide repeat
			JC_C100001255	Cellular retinaldehyde-binding/triple function, C-terminal IPR008273; Cellular retinaldehyde-binding/triple function, N-terminal IPR009038; GOLD IPR011074; Phosphatidylinositol transfer protein-like, N-terminal
			JC_C100013583	Protein kinase, catalytic domain IPR002290; Serine/threonine-protein kinase domain IPR011009; Protein kinase-like domain IPR017442; Serine/threonine-protein kinase-like domain IPR020635; Tyrosine-protein kinase, subgroup, catalytic domain
			JC_C100006669	Lipopolysaccharide-modifying protein IPR008539; Protein of unknown function DUF821, CAP10-like
			JC_C100010908	-
			JC_C100013938	De-etiolated protein 1, Det1
			JC_C100016746	Ribosomal protein S23/S29, mitochondrial
			JC_C100012325	Pentatricopeptide repeat
			JC_C100007271	Alpha/beta hydrolase fold-1
			JC_C100021842	SWIB/MDM2 domain IPR019835; SWIB domain
			JC_C100022931	Photosystem I reaction centre subunit IV/PsaE IPR008990; Electron transport accessory protein
			JC_C100020618	Protein kinase, catalytic domain IPR001611; Leucine-rich repeat IPR002290; Serine/threonine-protein kinase domain IPR011009; Protein kinase-like domain IPR013210; Leucine-rich repeat, N-terminal IPR017442; Serine/threonine-protein kinase-like domain IPR020635; Tyrosine-protein kinase, subgroup, catalytic domain
			JC_C100018712	-
			JC_C100010234	-
			JC_C100018541	Mitochondrial substrate carrier IPR002048; Calcium-binding EF-hand IPR018108; Mitochondrial substrate/solute carrier IPR018248; EF-Hand domain IPR018249; EF-HAND 2
			JC_C100022997	DNA replication factor CDT1-like
			JC_C100031611	Leucine-rich repeat IPR002182; NB-ARC
			JC_C100003607	Zinc finger, DHHC-type
			JC_C100014080	GroES-like IPR013149; Alcohol dehydrogenase, zinc-binding IPR016040; NAD(P)-binding domain IPR020843; Polyketide synthase, enoylreductase
			JC_C100025383	Mitochondrial glycoprotein
			JC_C100013631	GO:0031224//intrinsic to membrane
			JC_C100026048	Pentatricopeptide repeat
			JC_C100011814	-
			JC_C100025818	Tesmin/TSO1-like, CXC
			JC_C100005908	C2 calcium-dependent membrane targeting IPR008973; C2 calcium/lipid-binding region, CaLB IPR018029; C2 membrane targeting protein
			JC_C100001695	Peptidase C48, SUMO/Sentrin/Ubl1
			JC_C100015115	Protein of unknown function DUF246, plant
			JC_C100021846	SANT, DNA-binding IPR001279; Beta-lactamase-like IPR011108; RNA-metabolising metallo-beta-lactamase IPR017877; MYB-like
			JC_C100016333	Rare lipoprotein A IPR007112; Expansin 45, endoglucanase-like IPR007117; Pollen allergen/expansin, C-terminal IPR009009; Barwin-related endoglucanase
			JC_C100021922	Protein of unknown function DUF239, plant
			JC_C100007012	Chlorophyll A-B binding protein
			JC_C100026236	Oligopeptide transporter IPR016196; Major facilitator superfamily, general substrate transporter
			JC_C100015169	Semialdehyde dehydrogenase, NAD-binding IPR012280; Semialdehyde dehydrogenase, dimerisation region IPR016040; NAD(P)-binding domain
			JC_C100022672	Mitochodrial transcription termination factor-related
			JC_C100022776	Phosphoglycerate mutase
			JC_C100016787	DNA replication factor CDT1-like
			JC_C100018391	Transcription factor, FAR1-related IPR006564; Zinc finger, PMZ-type IPR007527; Zinc finger, SWIM-type IPR018289; MULE transposase, conserved domain
			JC_C100009924	Pentatricopeptide repeat
			JC_C100015611	GO:0043231//intracellular membrane-bounded organelle
			JC_C100002221	Oligopeptide transporter IPR016196; Major facilitator superfamily, general substrate transporter
			JC_C100011806	YABBY protein IPR009071; High mobility group, superfamily
			JC_C100001522	HEAT IPR016024; Armadillo-type fold
			JC_C100006992	Cytochrome b561/ferric reductase transmembrane IPR007613; Protein of unknown function DUF568, DOMON-like
			JC_C100016213	Peptidase A1 IPR009007; Peptidase aspartic, catalytic
			JC_C100024732	-
			JC_C100001097	Homeobox IPR006456; ZF-HD homeobox protein Cys/His-rich dimerisation region
			JC_C100011607	-
			JC_C100008422	Pentatricopeptide repeat
			JC_C100017768	Cyclin-like F-box IPR006553; Leucine-rich repeat, cysteine-containing subtype
			JC_C100013025	BRCT
			JC_C100024152	Engulfment/cell motility, ELMO
			JC_C100017295	Protein kinase, catalytic domain IPR002290; Serine/threonine-protein kinase domain IPR011009; Protein kinase-like domain IPR017442; Serine/threonine-protein kinase-like domain IPR020635; Tyrosine-protein kinase, subgroup, catalytic domain
			JC_C100022252	Metallophosphoesterase IPR008963; Purple acid phosphatase-like, N-terminal
			JC_C100008899	CARP motif IPR012945; Tubulin binding cofactor C IPR017901; C-CAP/cofactor C-like domain
			JC_C100025634	GCN5-related N-acetyltransferase IPR016181; Acyl-CoA N-acyltransferase
			JC_C100013054	Zinc finger, RING-type IPR018957; Zinc finger, C3HC4 RING-type
			JC_C100023941	Cytochrome b5
			JC_C100008231	Glycosyl transferase, family 10
			JC_C100018605	Short-chain dehydrogenase/reductase SDR IPR016040; NAD(P)-binding domain
			JC_C100025586	Zinc finger, CCCH-type IPR006767; Cwf19-like protein, C-terminal domain-2 IPR006768; Cwf19-like, C-terminal domain-1 IPR011146; Histidine triad-like motif
			JC_C100011370	Protein of unknown function DUF827, plant
			JC_C100004830	Kinesin, motor region IPR007520; Bul1, C-terminal
			JC_C100014722	Protein of unknown function DUF506, plant
			JC_C100004120	GO:0005622//intracellular
			JC_C100022804	Heat shock protein DnaJ, N-terminal
			JC_C100005189	Glutamine amidotransferase, class-II IPR000836; Phosphoribosyltransferase IPR017932; Glutamine amidotransferase, type II
			JC_C100021282	-
			JC_C100025882	Tetraspanin
			JC_C100011380	Lipin, N-terminal conserved region IPR013209; LNS2, Lipin/Ned1/Smp2
			JC_C100021436	Pentatricopeptide repeat
			JC_C100016177	Protein kinase, catalytic domain IPR002290; Serine/threonine-protein kinase domain IPR011009; Protein kinase-like domain IPR017442; Serine/threonine-protein kinase-like domain IPR020635; Tyrosine-protein kinase, subgroup, catalytic domain
			JC_C100014891	Dual specificity phosphatase, catalytic domain IPR000387; Dual-specific/protein-tyrosine phosphatase, conserved region IPR020422; Dual specificity phosphatase, subgroup, catalytic domain
			JC_C100009101	-
			JC_C100024942	Cyclic nucleotide-binding IPR000719; Protein kinase, catalytic domain IPR001932; Protein phosphatase 2C-related IPR002290; Serine/threonine-protein kinase domain IPR011009; Protein kinase-like domain IPR014045; Protein phosphatase 2C, N-terminal IPR017442; Serine/threonine-protein kinase-like domain IPR018490; Cyclic nucleotide-binding-like
			JC_C100020119	Lecithin:cholesterol acyltransferase
			JC_C100026482	Starch synthase III IPR013534; Starch synthase catalytic region
			JC_C100022693	Haem peroxidase, plant/fungal/bacterial IPR010255; Haem peroxidase
			JC_C100016119	Cellular retinaldehyde-binding/triple function, C-terminal IPR008273; Cellular retinaldehyde-binding/triple function, N-terminal IPR011074; Phosphatidylinositol transfer protein-like, N-terminal
			JC_C100022022	Peptidase C19, ubiquitin carboxyl-terminal hydrolase 2 IPR006865; Protein of unknown function DUF629 IPR006866; Protein of unknown function DUF627
			JC_C100000569	-
			JC_C100018061	-
			JC_C100006178	PWWP
			JC_C100008641	Transcription factor jumonji/aspartyl beta-hydroxylase
			JC_C100022707	Heat shock protein DnaJ, cysteine-rich region IPR001623; Heat shock protein DnaJ, N-terminal IPR002939; Chaperone DnaJ, C-terminal IPR008971; HSP40/DnaJ peptide-binding
			JC_C100020906	Protein kinase, catalytic domain IPR002290; Serine/threonine-protein kinase domain IPR011009; Protein kinase-like domain IPR017442; Serine/threonine-protein kinase-like domain IPR020635; Tyrosine-protein kinase, subgroup, catalytic domain
			JC_C100026987	Mitochondrial substrate carrier IPR018108; Mitochondrial substrate/solute carrier
			JC_C100020726	Rop nucleotide exchanger, PRONE
			JC_C100001263	Urease accessory protein UreD
			JC_C100017331	Protein of unknown function DUF1442
			JC_C100018698	Aminotransferase, class V/Cysteine desulfurase IPR015424; Pyridoxal phosphate-dependent transferase, major region
			JC_C100010230	Signal transduction response regulator, receiver region IPR009057; Homeodomain-like IPR011006; CheY-like IPR014778; Myb, DNA-binding IPR017930; Myb-type HTH DNA-binding domain
			JC_C100011497	Cyclin IPR006671; Cyclin, N-terminal IPR011028; Cyclin-like
			JC_C100024788	-
			JC_C100002586	-
			JC_C100013278	Glucose-6-phosphate dehydrogenase IPR016040; NAD(P)-binding domain
			JC_C100009420	ZF-HD homeobox protein Cys/His-rich dimerisation region
			JC_C100003547	Pectate lyase/Amb allergen IPR011050; Pectin lyase fold/virulence factor
			JC_C100002669	GO:0043231//intracellular membrane-bounded organelle
			JC_C100009597	Protein of unknown function DUF246, plant
			JC_C100002726	Zinc finger, RING-type IPR002035; von Willebrand factor, type A IPR010734; Copine IPR018957; Zinc finger, C3HC4 RING-type
			JC_C100006228	Protein kinase, catalytic domain IPR002290; Serine/threonine-protein kinase domain IPR011009; Protein kinase-like domain IPR017442; Serine/threonine-protein kinase-like domain IPR020635; Tyrosine-protein kinase, subgroup, catalytic domain
			JC_C100007728	SET
			JC_C100020093	Zinc finger, CCCH-type IPR003034; DNA-binding SAP
			JC_C100004605	Protein of unknown function DUF231, plant
			JC_C100004556	Phenylalanine/histidine ammonia-lyase IPR008948; L-Aspartase-like
			JC_C100023749	Lipase, class 3
			JC_C100003738	Pentatricopeptide repeat
			JC_C100025242	Homeobox IPR002913; Lipid-binding START IPR009057; Homeodomain-like IPR013978; MEKHLA
			JC_C100010112	Protein kinase, catalytic domain IPR001245; Tyrosine-protein kinase, catalytic domain IPR002290; Serine/threonine-protein kinase domain IPR011009; Protein kinase-like domain IPR017442; Serine/threonine-protein kinase-like domain
			JC_C100010439	Protein kinase, catalytic domain IPR002290; Serine/threonine-protein kinase domain IPR011009; Protein kinase-like domain IPR017442; Serine/threonine-protein kinase-like domain IPR020635; Tyrosine-protein kinase, subgroup, catalytic domain
			JC_C100011571	-
			JC_C100022945	TENA/THI-4 protein/Coenzyme PQQ biosynthesis protein C IPR016084; Haem oxygenase-like, multi-helical
			JC_C100014880	Guanylate kinase IPR008145; Guanylate kinase/L-type calcium channel region
			JC_C100024082	Phosphotransferase KptA/Tpt1
			JC_C100004940	Zinc finger, Sec23/Sec24-type IPR006896; Sec23/Sec24 trunk region IPR006900; Sec23/Sec24 helical region IPR007123; Gelsolin region IPR012990; Sec23/Sec24 beta-sandwich
			JC_C100006508	Ribose 5-phosphate isomerase
			JC_C100011436	Methyladenine glycosylase IPR011257; DNA glycosylase
			JC_C100026701	RNA recognition motif, RNP-1
			JC_C100012563	-
			JC_C100004075	Protein of unknown function DUF1168
			JC_C100001976	Peptidase S10, serine carboxypeptidase
			JC_C100014023	Lipase/lipooxygenase, PLAT/LH2 IPR010417; Embryo-specific 3
			JC_C100011522	Granulin IPR000668; Peptidase C1A, papain C-terminal IPR013201; Proteinase inhibitor I29, cathepsin propeptide
			JC_C100025281	Bromo adjacent region
			JC_C100023523	Protein phosphatase 2A, regulatory B subunit, B56
			JC_C100014524	-
			JC_C100003511	AUX/IAA protein IPR011525; Aux/IAA-ARF-dimerisation
			JC_C100018994	RNA recognition motif, RNP-1 IPR007201; RNA recognition motif 2
			JC_C100022719	Cyclin, C-terminal IPR006670; Cyclin IPR006671; Cyclin, N-terminal IPR011028; Cyclin-like
			JC_C100004038	Pleckstrin/G-protein, interacting region IPR002109; Glutaredoxin IPR006869; Protein of unknown function DUF547 IPR012336; Thioredoxin-like fold
			JC_C100010334	Armadillo-type fold
			JC_C100003332	-
			JC_C100023174	Protein kinase, catalytic domain IPR002290; Serine/threonine-protein kinase domain IPR011009; Protein kinase-like domain IPR017442; Serine/threonine-protein kinase-like domain IPR020635; Tyrosine-protein kinase, subgroup, catalytic domain
			JC_C100018607	-
			JC_C100010349	-
			JC_C100007168	DNA-directed DNA polymerase, family B, exonuclease domain IPR006134; DNA-directed DNA polymerase, family B, conserved region IPR006172; DNA-directed DNA polymerase, family B IPR012337; Polynucleotidyl transferase, ribonuclease H fold
			JC_C100000685	IQ calmodulin-binding region
			JC_C100020043	SET IPR003105; SRA-YDG IPR003606; Pre-SET zinc-binding sub-group IPR003616; Post-SET zinc-binding region IPR007728; Pre-SET zinc-binding region
			JC_C100003736	Leucine-rich repeat
			JC_C100001049	Zinc finger, BED-type predicted IPR007021; Protein of unknown function DUF659 IPR008906; HAT dimerisation IPR011523; Protein of unknown function DUF1544
			JC_C100017574	Leucine-rich repeat
			JC_C100012661	Protein of unknown function DUF620
			JC_C100004599	Single-stranded nucleic acid binding R3H
			JC_C100026827	Protein of unknown function DUF6, transmembrane
			JC_C100002258	Short-chain dehydrogenase/reductase SDR IPR016040; NAD(P)-binding domain
			JC_C100008782	DNA recombination and repair protein RecA IPR020588; DNA recombination/repair protein RecA/RadB, ATP-binding domain
			JC_C100011263	Zinc finger, ZZ-type IPR001005; SANT, DNA-binding IPR007526; SWIRM IPR009057; Homeodomain-like IPR014778; Myb, DNA-binding IPR017884; SANT, eukarya
			JC_C100026324	Histone H2A IPR007125; Histone core IPR009072; Histone-fold
			JC_C100004462	Glycoside hydrolase, family 17 IPR012946; X8 IPR017853; Glycoside hydrolase, catalytic core
			JC_C100007622	Bromo adjacent region IPR001525; DNA methylase, C-5 cytosine-specific
			JC_C100021148	-
			JC_C100013137	Targeting for Xklp2 protein
			JC_C100026193	-
			JC_C100019872	RNA recognition motif, RNP-1 IPR001623; Heat shock protein DnaJ, N-terminal
			JC_C100010071	FAE1/Type III polyketide synthase-like protein IPR013747; 3-Oxoacyl-[acyl-carrier-protein (ACP)] synthase III C-terminal IPR016039; Thiolase-like
			JC_C100009380	-
			JC_C100008747	Cellulose synthase
			JC_C100012240	-
			JC_C100013319	Pseudouridine synthase II, TruB, N-terminal IPR020103; Pseudouridine synthase, catalytic domain
			JC_C100018699	Octicosapeptide/Phox/Bem1p IPR004332; Transposase, MuDR, plant IPR006564; Zinc finger, PMZ-type IPR007527; Zinc finger, SWIM-type IPR018289; MULE transposase, conserved domain
			JC_C100015966	Double-stranded RNA binding
			JC_C100022477	Peptidase S8/S53, subtilisin/kexin/sedolisin IPR003137; Protease-associated PA IPR009020; Proteinase inhibitor, propeptide IPR010259; Proteinase inhibitor I9, subtilisin propeptide
			JC_C100018559	RNA recognition motif, RNP-1 IPR007201; RNA recognition motif 2
			JC_C100013858	Cytochrome P450
			JC_C100004233	Heat shock protein DnaJ, N-terminal
			JC_C100017385	Pentatricopeptide repeat
			JC_C100018291	Spermine synthase
			JC_C100007866	Peptidase S10, serine carboxypeptidase
			JC_C100006558	Translation initiation factor SUI1 IPR002478; Pseudouridine synthase/archaeosine transglycosylase IPR003121; SWIB/MDM2 domain IPR015947; Pseudouridine synthase/archaeosine transglycosylase-like
			JC_C100003964	NAD-dependent glycerol-3-phosphate dehydrogenase, C-terminal IPR008927; 6-phosphogluconate dehydrogenase, C-terminal-like IPR011128; NAD-dependent glycerol-3-phosphate dehydrogenase, N-terminal IPR016040; NAD(P)-binding domain
			JC_C100024120	Palmitoyl protein thioesterase
			JC_C100002074	Protein kinase, catalytic domain IPR001220; Legume lectin, beta chain IPR002290; Serine/threonine-protein kinase domain IPR008985; Concanavalin A-like lectin/glucanase IPR011009; Protein kinase-like domain IPR017442; Serine/threonine-protein kinase-like domain IPR020635; Tyrosine-protein kinase, subgroup, catalytic domain
			JC_C100001038	HEAT IPR001494; Importin-beta, N-terminal IPR016024; Armadillo-type fold
			JC_C100013349	Glycoside hydrolase, family 28 IPR006626; Parallel beta-helix repeat IPR011050; Pectin lyase fold/virulence factor
			JC_C100013004	Protein of unknown function DUF632
			JC_C100002550	Pentatricopeptide repeat
			JC_C100014812	-
			JC_C100016446	Zinc finger, DHHC-type
			JC_C100009202	Fatty acid hydroxylase IPR016040; NAD(P)-binding domain
			JC_C100025533	Protein of unknown function DUF1005
			JC_C100009124	Protein kinase, catalytic domain IPR001245; Tyrosine-protein kinase, catalytic domain IPR001611; Leucine-rich repeat IPR002290; Serine/threonine-protein kinase domain IPR003591; Leucine-rich repeat, typical subtype IPR011009; Protein kinase-like domain IPR013210; Leucine-rich repeat, N-terminal IPR020635; Tyrosine-protein kinase, subgroup, catalytic domain
			JC_C100011189	THO complex, subunit 5
			JC_C100015041	-
			JC_C100022711	Leucine-rich repeat, cysteine-containing subtype
			JC_C100019472	GO:0031410//cytoplasmic vesicle;GO:0043231//intracellular membrane-bounded organelle
			JC_C100015427	-
			JC_C100015907	Kinesin, motor region IPR001841; Zinc finger, RING-type
			JC_C100009984	Kinesin, motor region IPR010544; Kinesin-related
			JC_C100016434	Zinc finger, C3HC4 RING-type
			JC_C100009102	Haem peroxidase, plant/fungal/bacterial IPR010255; Haem peroxidase
			JC_C100019579	NUDIX hydrolase domain IPR015797; NUDIX hydrolase domain-like
			JC_C100004361	Pentatricopeptide repeat
			JC_C100018733	-
			JC_C100025497	Basic helix-loop-helix dimerisation region bHLH IPR011598; Helix-loop-helix DNA-binding
			JC_C100019381	IQ calmodulin-binding region IPR001609; Myosin head, motor region
			JC_C100025262	-
			JC_C100000186	Glycoside hydrolase, family 3, N-terminal IPR002772; Glycoside hydrolase, family 3, C-terminal IPR017853; Glycoside hydrolase, catalytic core
			JC_C100012481	Protein of unknown function DUF702
			JC_C100021995	Pentatricopeptide repeat
			JC_C100023163	Signal transduction response regulator, receiver region IPR003594; ATP-binding region, ATPase-like IPR003661; Signal transduction histidine kinase, subgroup 1, dimerisation/phosphoacceptor region IPR005467; Signal transduction histidine kinase, core IPR006189; CHASE IPR009082; Signal transduction histidine kinase, homodimeric IPR011006; CheY-like
			JC_C100016531	Transcriptional factor B3
			JC_C100022506	Amino acid-binding ACT IPR006139; D-isomer specific 2-hydroxyacid dehydrogenase, catalytic region IPR006140; D-isomer specific 2-hydroxyacid dehydrogenase, NAD-binding IPR016040; NAD(P)-binding domain
			JC_C100020308	High mobility group, HMG1/HMG2 IPR009071; High mobility group, superfamily
			JC_C100023743	Protein of unknown function DUF2261, transmembrane
			JC_C100022868	Cyclin, C-terminal IPR006670; Cyclin IPR006671; Cyclin, N-terminal IPR011028; Cyclin-like
			JC_C100016079	Natural resistance-associated macrophage protein
			JC_C100011537	Amine oxidase IPR007526; SWIRM
			JC_C100025335	Exo70 exocyst complex subunit
			JC_C100000553	Transcription factor, FAR1-related IPR006564; Zinc finger, PMZ-type IPR007527; Zinc finger, SWIM-type IPR018289; MULE transposase, conserved domain
			JC_C100017798	Tetratricopeptide TPR-1 IPR013026; Tetratricopeptide region IPR019734; Tetratricopeptide repeat
			JC_C100002875	Cyclin-like F-box IPR006652; Kelch repeat type 1 IPR011043; Galactose oxidase/kelch, beta-propeller
			JC_C100012902	SecA DEAD-like IPR011116; SecA Wing/Scaffold IPR011130; SecA preprotein cross-linking region IPR014018; SecA motor DEAD
			JC_C100010624	Cyclin, C-terminal IPR006670; Cyclin IPR006671; Cyclin, N-terminal IPR011028; Cyclin-like
			JC_C100006928	mRNA splicing factor SYF2
			JC_C100009594	Mediator complex, subunit Med10
			JC_C100010911	Zinc finger, CCCH-type IPR001841; Zinc finger, RING-type IPR018957; Zinc finger, C3HC4 RING-type
			JC_C100020352	Initiation factor 2B related
			JC_C100023818	Cytochrome P450
			JC_C100001706	GO:0034357
			JC_C100018029	Protein kinase, catalytic domain IPR002290; Serine/threonine-protein kinase domain IPR011009; Protein kinase-like domain IPR017442; Serine/threonine-protein kinase-like domain IPR020635; Tyrosine-protein kinase, subgroup, catalytic domain
			JC_C100025802	Nucleotidyltransferase IPR007010; Poly(A) polymerase, RNA-binding region IPR007012; Poly(A) polymerase, central region IPR011068; Nucleotidyltransferase, class I, C-terminal-like
			JC_C100026127	MADF domain
			JC_C100022966	Lecithin:cholesterol acyltransferase
			JC_C100015874	Double-stranded RNA binding IPR001650; DNA/RNA helicase, C-terminal IPR007502; Helicase-associated region IPR011545; DNA/RNA helicase, DEAD/DEAH box type, N-terminal IPR011709; Domain of unknown function DUF1605 IPR014001; DEAD-like helicase, N-terminal IPR014021; Helicase, superfamily 1/2, ATP-binding domain
			JC_C100022909	SANT, DNA-binding IPR006562; HSA IPR009057; Homeodomain-like IPR013999; HAS subgroup IPR014012; Helicase/SANT-associated, DNA binding IPR017877; MYB-like
			JC_C100011886	Armadillo-type fold
			JC_C100026207	-
			JC_C100007558	Protein kinase, catalytic domain IPR011009; Protein kinase-like domain
			JC_C100005438	Heat shock protein DnaJ, N-terminal
			JC_C100010571	SET IPR003169; GYF IPR003616; Post-SET zinc-binding region
			JC_C100010705	Kinesin, motor region
			JC_C100022637	Pentatricopeptide repeat
			JC_C100004580	Domain of unknown function DUF2431
			JC_C100012475	Telomerase activating protein Est1
			JC_C100021014	Domain of unknown function XH IPR005380; Domain of unknown function XS IPR005381; Domain of unknown function, putative Zinc finger, XS/XH
			JC_C100010240	-
			JC_C100018368	Pentatricopeptide repeat
			JC_C100011143	Phosphatidylinositol 3-/4-kinase, catalytic IPR011009; Protein kinase-like domain IPR016024; Armadillo-type fold
			JC_C100006161	Pentatricopeptide repeat
			JC_C100018412	Prolyl 4-hydroxylase, alpha subunit
			JC_C100032915	NADH-quinone oxidoreductase, subunit D
			JC_C100003564	SET IPR003105; SRA-YDG IPR003606; Pre-SET zinc-binding sub-group IPR007728; Pre-SET zinc-binding region
			JC_C100010766	GO:0009526//plastid envelope
			JC_C100022828	-
			JC_C100018654	Protein kinase, catalytic domain IPR002290; Serine/threonine-protein kinase domain IPR011009; Protein kinase-like domain IPR017442; Serine/threonine-protein kinase-like domain IPR020635; Tyrosine-protein kinase, subgroup, catalytic domain
			JC_C100020459	Transcription initiation factor TFIID IPR009072; Histone-fold
			JC_C100024333	Pentatricopeptide repeat
			JC_C100011330	Inositol-pentakisphosphate 2-kinase
			JC_C100026124	14-3-3 protein
			JC_C100009800	Protein of unknown function DUF538
			JC_C100008045	Peptidase S14, ClpP
			JC_C100009674	Transcription antitermination protein, NusG, N-terminal IPR008991; Translation protein SH3-like
			JC_C100010467	Thioesterase superfamily
			JC_C100013657	CASC3/Barentsz eIF4AIII binding
			JC_C100002390	PWWP
			JC_C100007924	Aconitase A/isopropylmalate dehydratase small subunit, swivel IPR015928; Aconitase/3-isopropylmalate dehydratase, swivel
			JC_C100021334	Glyoxalase/bleomycin resistance protein/dioxygenase
			JC_C100017577	Pentatricopeptide repeat
			JC_C100020766	Protein kinase, catalytic domain IPR001220; Legume lectin, beta chain IPR002290; Serine/threonine-protein kinase domain IPR008985; Concanavalin A-like lectin/glucanase IPR011009; Protein kinase-like domain IPR017442; Serine/threonine-protein kinase-like domain IPR020635; Tyrosine-protein kinase, subgroup, catalytic domain
			JC_C100016223	Transferase
			JC_C100007807	DNA/RNA helicase, C-terminal IPR014001; DEAD-like helicase, N-terminal IPR014021; Helicase, superfamily 1/2, ATP-binding domain
			JC_C100005284	Bromodomain
			JC_C100007026	PAS IPR003018; GAF IPR003594; ATP-binding region, ATPase-like IPR003661; Signal transduction histidine kinase, subgroup 1, dimerisation/phosphoacceptor region IPR005467; Signal transduction histidine kinase, core IPR013515; Phytochrome, central region IPR013654; PAS fold-2 IPR013767; PAS fold IPR016132; Phytochrome chromophore attachment domain
			JC_C100024750	Protein of unknown function DUF599
			JC_C100017394	Bromodomain
			JC_C100011549	Zinc finger, RING-type IPR018957; Zinc finger, C3HC4 RING-type
			JC_C100010625	BTB/POZ-like IPR011333; BTB/POZ fold IPR013069; BTB/POZ
			JC_C100002917	GO:0009532//plastid stroma
			JC_C100005281	SNF2-related IPR001650; DNA/RNA helicase, C-terminal IPR014001; DEAD-like helicase, N-terminal IPR014021; Helicase, superfamily 1/2, ATP-binding domain
			JC_C100003557	GO:0043231//intracellular membrane-bounded organelle
			JC_C100015989	Short-chain dehydrogenase/reductase SDR IPR016040; NAD(P)-binding domain
			JC_C100011702	Protein of unknown function DUF1685
			JC_C100012454	Las1-like
			JC_C100021541	Peptidase C48, SUMO/Sentrin/Ubl1
			JC_C100009512	Protein kinase, catalytic domain IPR002290; Serine/threonine-protein kinase domain IPR011009; Protein kinase-like domain IPR017442; Serine/threonine-protein kinase-like domain IPR020635; Tyrosine-protein kinase, subgroup, catalytic domain
			JC_C100021081	Protein of unknown function DUF1997
			JC_C100024233	Glycoside hydrolase, family 1 IPR017853; Glycoside hydrolase, catalytic core
			JC_C100022138	Zinc finger, Dof-type
			JC_C100005838	Rhodanese-like
			JC_C100020107	-
			JC_C100019317	ASCH domain
			JC_C100005827	GO:0043229//intracellular organelle
			JC_C100017872	Zinc finger, RING-type IPR002035; von Willebrand factor, type A IPR018957; Zinc finger, C3HC4 RING-type
			JC_C100019104	Protein of unknown function DUF1645
			JC_C100001913	Nonaspanin (TM9SF)
			JC_C100023630	Ribonuclease III IPR001159; Double-stranded RNA binding
			JC_C100012497	Pentatricopeptide repeat
			JC_C100014326	Exoribonuclease, phosphorolytic domain 1 IPR003029; Ribosomal protein S1, RNA binding domain IPR004087; K Homology IPR004088; K Homology, type 1 IPR015847; Exoribonuclease, phosphorolytic domain 2 IPR015848; Polynucleotide phosphorylase, phosphorolytic RNA-binding, bacterial/organelle-type IPR016027; Nucleic acid-binding, OB-fold-like IPR018111; K Homology, type 1, subgroup IPR020568; Ribosomal p…
			JC_C100017072	Zinc finger, C2H2-type
			JC_C100013628	Mitochodrial transcription termination factor-related
			JC_C100026484	Protein of unknown function DUF584
			JC_C100024470	-
			JC_C100007706	Glycosyl transferase, family 8
			JC_C100009906	Pentatricopeptide repeat
			JC_C100017505	Peptidase C1A, papain C-terminal IPR013201; Proteinase inhibitor I29, cathepsin propeptide
			JC_C100003972	-
			JC_C100010987	Pentatricopeptide repeat
			JC_C100000219	Basic helix-loop-helix dimerisation region bHLH
			JC_C100022303	Protein phosphatase 2C-related IPR014045; Protein phosphatase 2C, N-terminal
			JC_C100003120	GO:0044464//cell part
			JC_C100035008	Pentatricopeptide repeat
			JC_C100007174	SET IPR002893; Zinc finger, MYND-type
			JC_C100008120	Alpha/beta hydrolase fold-1
			JC_C100022807	Basic helix-loop-helix dimerisation region bHLH IPR011598; Helix-loop-helix DNA-binding
			JC_C100024115	Pentatricopeptide repeat
			JC_C100020388	Xyloglucan fucosyltransferase
			JC_C100001137	-
			JC_C100021480	FAS1 domain
			JC_C100003270	GO:0016020//membrane
			JC_C100004993	-
			JC_C100006016	Ionotropic glutamate receptor IPR001828; Extracellular ligand-binding receptor
			JC_C100004781	Nucleotidyltransferase IPR007010; Poly(A) polymerase, RNA-binding region IPR007012; Poly(A) polymerase, central region IPR011068; Nucleotidyltransferase, class I, C-terminal-like
			JC_C100010972	ATPase, AAA+ type, core IPR003959; ATPase, AAA-type, core IPR007942; Phospholipase-like, arabidopsis
			JC_C100012182	Protein kinase, catalytic domain IPR001611; Leucine-rich repeat IPR002290; Serine/threonine-protein kinase domain IPR011009; Protein kinase-like domain IPR017442; Serine/threonine-protein kinase-like domain IPR020635; Tyrosine-protein kinase, subgroup, catalytic domain
			JC_C100024544	-
			JC_C100001360	Inner nuclear membrane protein MAN1, C-terminal
			JC_C100010469	Exoribonuclease, phosphorolytic domain 1 IPR015847; Exoribonuclease, phosphorolytic domain 2 IPR020568; Ribosomal protein S5 domain 2-type fold
			JC_C100012899	Pentatricopeptide repeat
			JC_C100019474	RNA-binding, CRM domain
			JC_C100008367	Protein phosphatase 2C-related IPR014045; Protein phosphatase 2C, N-terminal
			JC_C100001113	Sucrose-6F-phosphate phosphohydrolase, plant/cyanobacteria IPR013679; Sucrose-6-phosphate phosphohydrolase C-terminal
			JC_C100010092	Mitochondrial substrate carrier IPR018108; Mitochondrial substrate/solute carrier
			JC_C100011110	SANT, DNA-binding IPR009057; Homeodomain-like IPR014778; Myb, DNA-binding IPR017930; Myb-type HTH DNA-binding domain
			JC_C100023351	RabGAP/TBC
			JC_C100020579	Zinc finger, C2H2-type IPR015880; Zinc finger, C2H2-like IPR016177; DNA-binding, integrase-type
			JC_C100020415	Intron-encoded nuclease 2
			JC_C100013859	Protein kinase, catalytic domain IPR002290; Serine/threonine-protein kinase domain IPR011009; Protein kinase-like domain IPR017442; Serine/threonine-protein kinase-like domain IPR020635; Tyrosine-protein kinase, subgroup, catalytic domain
			JC_C100007233	BRCT IPR001841; Zinc finger, RING-type IPR018957; Zinc finger, C3HC4 RING-type
			JC_C100014449	tRNA (guanine-N-7) methyltransferase
			JC_C100021009	GRAS transcription factor
			JC_C100015084	-
			JC_C100019811	Protein kinase, catalytic domain IPR002290; Serine/threonine-protein kinase domain IPR011009; Protein kinase-like domain IPR017442; Serine/threonine-protein kinase-like domain IPR020635; Tyrosine-protein kinase, subgroup, catalytic domain
			JC_C100023609	Amidohydrolase 1 IPR011059; Metal-dependent hydrolase, composite domain
			JC_C100017015	Ran binding protein 1
			JC_C100005583	Regulator of K+ conductance, N-terminal IPR006153; Cation/H+ exchanger IPR016040; NAD(P)-binding domain
			JC_C100021915	UBA-like IPR010820; Protein of unknown function DUF1421
			JC_C100012197	Zinc finger, C2H2-type IPR015880; Zinc finger, C2H2-like
			JC_C100003698	Cyclin, C-terminal IPR006670; Cyclin IPR006671; Cyclin, N-terminal IPR011028; Cyclin-like
			JC_C100009452	Galactose-binding like IPR010325; Rhamnogalacturonate lyase IPR011013; Glycoside hydrolase-type carbohydrate-binding IPR013784; Carbohydrate-binding-like fold
			JC_C100018950	Protein kinase, catalytic domain IPR001611; Leucine-rich repeat IPR002290; Serine/threonine-protein kinase domain IPR003591; Leucine-rich repeat, typical subtype IPR011009; Protein kinase-like domain IPR013210; Leucine-rich repeat, N-terminal IPR017442; Serine/threonine-protein kinase-like domain IPR020635; Tyrosine-protein kinase, subgroup, catalytic domain
			JC_C100023854	Protein kinase, catalytic domain IPR002290; Serine/threonine-protein kinase domain IPR011009; Protein kinase-like domain IPR017442; Serine/threonine-protein kinase-like domain IPR020635; Tyrosine-protein kinase, subgroup, catalytic domain
			JC_C100018955	-
			JC_C100021543	Elongator protein 3/MiaB/NifB IPR007197; Radical SAM IPR010723; HemN, C-terminal
			JC_C100025374	Protein kinase, catalytic domain IPR002290; Serine/threonine-protein kinase domain IPR011009; Protein kinase-like domain IPR017442; Serine/threonine-protein kinase-like domain IPR020635; Tyrosine-protein kinase, subgroup, catalytic domain
			JC_C100004200	Cation efflux protein
			JC_C100009127	Ribonuclease III IPR001159; Double-stranded RNA binding IPR001650; DNA/RNA helicase, C-terminal IPR003100; Argonaute/Dicer protein, PAZ IPR005034; Dicer double-stranded RNA-binding fold
			JC_C100007485	D111/G-patch IPR000504; RNA recognition motif, RNP-1 IPR001876; Zinc finger, RanBP2-type
			JC_C100016992	Methyl-CpG DNA binding IPR016177; DNA-binding, integrase-type
			JC_C100019483	Heat shock protein 70
			JC_C100010272	-
			JC_C100021218	Protein kinase, catalytic domain IPR002290; Serine/threonine-protein kinase domain IPR011009; Protein kinase-like domain IPR017442; Serine/threonine-protein kinase-like domain IPR020635; Tyrosine-protein kinase, subgroup, catalytic domain
			JC_C100026234	Regulator of chromosome condensation, RCC1 IPR009091; Regulator of chromosome condensation/beta-lactamase-inhibitor protein II
			JC_C100006594	Zinc finger, RING-type IPR018957; Zinc finger, C3HC4 RING-type
			JC_C100009372	RNA recognition motif, RNP-1 IPR003954; RNA recognition, region 1
			JC_C100022324	Aminoacyl-tRNA synthetase, class II (G/ H/ P/ S), conserved region IPR006195; Aminoacyl-tRNA synthetase, class II, conserved region IPR010978; tRNA-binding arm IPR015866; Seryl-tRNA synthetase, class IIa, N-terminal
			JC_C100018150	Peptidase T2, asparaginase 2
			JC_C100008804	-
			JC_C100026131	Protein of unknown function DUF688
			JC_C100007781	Targeting for Xklp2 protein
			JC_C100026875	Guanylate-binding protein-like, C-terminal
			JC_C100001471	MtN3/saliva-related transmembrane protein, conserved region
			JC_C100003815	Auxin efflux carrier
			JC_C100019711	Pentatricopeptide repeat
			JC_C100014291	-
			JC_C100019588	Zinc/iron permease
			JC_C100003566	Biopterin transport-related protein BT1 IPR016196; Major facilitator superfamily, general substrate transporter
			JC_C100004113	Protein kinase, catalytic domain IPR001611; Leucine-rich repeat IPR002290; Serine/threonine-protein kinase domain IPR011009; Protein kinase-like domain IPR017442; Serine/threonine-protein kinase-like domain IPR020635; Tyrosine-protein kinase, subgroup, catalytic domain
			JC_C100011572	-
			JC_C100023986	ELM2 IPR001606; AT-rich interaction region
			JC_C100026602	-
			JC_C100020873	Lactate/malate dehydrogenase IPR015955; Lactate dehydrogenase/glycoside hydrolase, family 4, C-terminal IPR016040; NAD(P)-binding domain
			JC_C100001867	-
			JC_C100019953	Protein of unknown function DUF829, transmembrane 53
			JC_C100001790	F-actin capping protein, beta subunit
			JC_C100020138	IQ calmodulin-binding region
			JC_C100007264	Zinc finger, RING-type IPR018957; Zinc finger, C3HC4 RING-type
			JC_C100024880	GO:0031224//intrinsic to membrane
			JC_C100002266	Protein kinase, catalytic domain IPR001611; Leucine-rich repeat IPR002290; Serine/threonine-protein kinase domain IPR003591; Leucine-rich repeat, typical subtype IPR011009; Protein kinase-like domain IPR013210; Leucine-rich repeat, N-terminal IPR017442; Serine/threonine-protein kinase-like domain IPR020635; Tyrosine-protein kinase, subgroup, catalytic domain
			JC_C100014297	GO:0043231//intracellular membrane-bounded organelle
			JC_C100022079	Actin-binding FH2/DRF autoregulatory IPR008973; C2 calcium/lipid-binding region, CaLB IPR014020; Tensin phosphatase, C2 domain IPR015425; Actin-binding FH2
			JC_C100001391	Cytochrome P450
			JC_C100005666	-
			JC_C100019505	Tetraacyldisaccharide 4'-kinase
			JC_C100000116	-
			JC_C100003715	Leucine-rich repeat
			JC_C100010377	AMP-dependent synthetase/ligase
			JC_C100012377	RNA polymerase sigma-70 region 3 IPR007627; RNA polymerase sigma-70 region 2 IPR007630; RNA polymerase sigma-70 region 4 IPR013324; RNA polymerase sigma factor, region 3/4 IPR013325; RNA polymerase sigma factor, region 2
			JC_C100021461	Amino acid-binding ACT
			JC_C100024449	Acid phosphatase/vanadium-dependent haloperoxidase related
			JC_C100026539	Protein kinase, catalytic domain IPR000742; EGF-like, type 3 IPR000858; S-locus glycoprotein IPR001480; Curculin-like (mannose-binding) lectin IPR002290; Serine/threonine-protein kinase domain IPR003609; Apple-like IPR011009; Protein kinase-like domain IPR013227; PAN-2 domain IPR014805; Transmembrane protein SKG6 IPR017442; Serine/threonine-protein kinase-like domain IPR020635; Tyrosine-protein k…
			JC_C100010784	Octicosapeptide/Phox/Bem1p IPR003035; Plant regulator RWP-RK
			JC_C100020336	-
			JC_C100006121	Protein kinase, catalytic domain IPR002290; Serine/threonine-protein kinase domain IPR011009; Protein kinase-like domain IPR017442; Serine/threonine-protein kinase-like domain IPR020635; Tyrosine-protein kinase, subgroup, catalytic domain
			JC_C100013336	Bacterial Ig-like, group 2 IPR008964; Invasin/intimin cell-adhesion
			JC_C100017246	Basic helix-loop-helix dimerisation region bHLH IPR011598; Helix-loop-helix DNA-binding
			JC_C100016462	Short-chain dehydrogenase/reductase SDR IPR016040; NAD(P)-binding domain
			JC_C100017679	Cell division cycle-associated protein
			JC_C100020887	Armadillo-type fold
			JC_C100009137	Peptidase S28
			JC_C100016534	Protein kinase, catalytic domain IPR001611; Leucine-rich repeat IPR002290; Serine/threonine-protein kinase domain IPR011009; Protein kinase-like domain IPR013210; Leucine-rich repeat, N-terminal IPR017442; Serine/threonine-protein kinase-like domain IPR020635; Tyrosine-protein kinase, subgroup, catalytic domain
			JC_C100024681	-
			JC_C100013323	RNA-binding, CRM domain
			JC_C100015922	SANT, DNA-binding IPR009057; Homeodomain-like IPR014778; Myb, DNA-binding IPR017884; SANT, eukarya
			JC_C100022912	-
			JC_C100002122	Acid phosphatase/vanadium-dependent haloperoxidase related
			JC_C100019105	-
			JC_C100001139	Rare lipoprotein A IPR007112; Expansin 45, endoglucanase-like IPR007117; Pollen allergen/expansin, C-terminal IPR009009; Barwin-related endoglucanase
			JC_C100010096	Haloacid dehalogenase-like hydrolase IPR008250; ATPase, P-type, ATPase-associated region IPR013200; HAD superfamily hydrolase-like, type 3
			JC_C100002384	Cation efflux protein
			JC_C100010611	Protein phosphatase 2C-related IPR014045; Protein phosphatase 2C, N-terminal
			JC_C100009835	-
			JC_C100026685	Zinc finger, RING-type IPR018957; Zinc finger, C3HC4 RING-type
			JC_C100001056	Dynamin central region IPR001401; Dynamin, GTPase region IPR001849; Pleckstrin homology IPR003130; Dynamin GTPase effector IPR020850; GTPase effector domain, GED
			JC_C100013061	Phospholipid/glycerol acyltransferase
			JC_C100013098	Ribosomal protein S21
			JC_C100020210	Pentatricopeptide repeat
			JC_C100011687	Protein of unknown function DUF1022
			JC_C100022803	Amino acid transporter, transmembrane
			JC_C100008819	SNARE-complex protein Syntaxin-18 N-terminal
			JC_C100013566	Prephenate dehydrogenase IPR004455; NADP oxidoreductase, coenzyme F420-dependent IPR016040; NAD(P)-binding domain
			JC_C100003190	Protein of unknown function DUF593
			JC_C100018978	DNA-dependent ATPase MCM IPR016027; Nucleic acid-binding, OB-fold-like
			JC_C100025481	-
			JC_C100012471	RhoGAP IPR001849; Pleckstrin homology IPR008936; Rho GTPase activation protein
			JC_C100015469	Raffinose synthase IPR017853; Glycoside hydrolase, catalytic core
			JC_C100011631	Target SNARE coiled-coil region IPR006011; Syntaxin, N-terminal IPR010989; t-SNARE
			JC_C100014800	-
			JC_C100006955	Cyclin-like F-box
			JC_C100023498	-
			JC_C100010255	PAPA-1-like conserved region IPR007529; Zinc finger, HIT-type
			JC_C100032653	U box domain IPR016024; Armadillo-type fold
			JC_C100011258	Cytochrome P450
			JC_C100019910	Calcium-binding EF-hand IPR018248; EF-Hand domain IPR018249; EF-HAND 2
			JC_C100007463	Pyridoxal phosphate-dependent decarboxylase IPR015424; Pyridoxal phosphate-dependent transferase, major region
			JC_C100012929	GO:0043231//intracellular membrane-bounded organelle
			JC_C100022209	GCK
			JC_C100004203	WRC
			JC_C100012571	Protein of unknown function DUF2348
			JC_C100004241	Actin/actin-like
			JC_C100026190	Oxoglutarate/iron-dependent oxygenase
			JC_C100026593	WD40 repeat IPR011046; WD40 repeat-like-containing domain IPR017986; WD40-repeat-containing domain IPR019781; WD40 repeat, subgroup IPR019782; WD40 repeat 2
			JC_C100002671	Inositol polyphosphate related phosphatase IPR005135; Endonuclease/exonuclease/phosphatase
			JC_C100013634	Bromo adjacent region
			JC_C100021994	Transcription factor E2F/dimerisation partner (TDP)
			JC_C100010114	GO:0009536//plastid
			JC_C100015430	Homeodomain-like IPR014778; Myb, DNA-binding IPR017930; Myb-type HTH DNA-binding domain
			JC_C100024995	IQ calmodulin-binding region
			JC_C100009518	Pentatricopeptide repeat
			JC_C100017170	Pleckstrin homology
			JC_C100010430	Importin-beta, N-terminal IPR016024; Armadillo-type fold
			JC_C100024303	Protein of unknown function CP12
			JC_C100007117	-
			JC_C100024200	Zinc finger, B-box IPR010402; CCT domain
			JC_C100026135	Protein kinase, catalytic domain IPR001245; Tyrosine-protein kinase, catalytic domain IPR001611; Leucine-rich repeat IPR002290; Serine/threonine-protein kinase domain IPR003591; Leucine-rich repeat, typical subtype IPR011009; Protein kinase-like domain IPR020635; Tyrosine-protein kinase, subgroup, catalytic domain
			JC_C100000762	Histone H3 IPR007125; Histone core IPR009072; Histone-fold
			JC_C100011873	Importin-beta, N-terminal IPR016024; Armadillo-type fold
			JC_C100010992	Methyltransferase-16, putative
			JC_C100023924	Rhodanese-like
			JC_C100001372	Rhodanese-like
			JC_C100025074	Tubulin-tyrosine ligase
			JC_C100010346	Alpha/beta hydrolase fold-1
			JC_C100024010	GO:0043231//intracellular membrane-bounded organelle
			JC_C100024586	Glycoside hydrolase, family 16 IPR008985; Concanavalin A-like lectin/glucanase
			JC_C100019531	Glycoside hydrolase, family 17 IPR012946; X8 IPR017853; Glycoside hydrolase, catalytic core
			JC_C100006859	Thaumatin, pathogenesis-related
			JC_C100022173	-
			JC_C100005532	Quinate/shikimate 5-dehydrogenase/glutamyl-tRNA reductase IPR015895; Tetrapyrrole biosynthesis, glutamyl-tRNA reductase, N-terminal IPR015896; Tetrapyrrole biosynthesis, glutamyl-tRNA reductase, C-terminal IPR016040; NAD(P)-binding domain
			JC_C100011817	GO:0043231//intracellular membrane-bounded organelle
			JC_C100028829	-
			JC_C100016244	Mitochondrial glycoprotein
			JC_C100020641	GO:0043231//intracellular membrane-bounded organelle
			JC_C100007226	Cyclin-like F-box IPR013101; Leucine-rich repeat 2 IPR013596; FBD
			JC_C100011248	Transcriptional factor B3
			JC_C100023837	3-oxo-5-alpha-steroid 4-dehydrogenase, C-terminal IPR010721; Protein of unknown function DUF1295
			JC_C100013553	Band 7 protein
			JC_C100017557	Pentatricopeptide repeat
			JC_C100013482	-
			JC_C100011754	Plant lipid transfer protein/seed storage/trypsin-alpha amylase inhibitor IPR016140; Bifunctional inhibitor/plant lipid transfer protein/seed storage
			JC_C100013208	Protein of unknown function DUF862, eukaryotic
			JC_C100010138	-
			JC_C100006190	GRAS transcription factor
			JC_C100015313	AT hook, DNA-binding motif
			JC_C100026761	Glycosyl hydrolase, family 13, catalytic region IPR006589; Glycosyl hydrolase, family 13, subfamily, catalytic region IPR012850; Alpha-amylase, C-terminal beta-sheet IPR017853; Glycoside hydrolase, catalytic core
			JC_C100003724	Amino acid-binding ACT IPR006139; D-isomer specific 2-hydroxyacid dehydrogenase, catalytic region IPR006140; D-isomer specific 2-hydroxyacid dehydrogenase, NAD-binding IPR016040; NAD(P)-binding domain
			JC_C100016310	Pentatricopeptide repeat
			JC_C100007067	GO:0009532//plastid stroma;GO:0044436;GO:0009534//chloroplast thylakoid
			JC_C100022551	TB2/DP1/HVA22 related protein
			JC_C100026782	Galectin, carbohydrate recognition domain IPR002659; Glycosyl transferase, family 31 IPR008985; Concanavalin A-like lectin/glucanase
			JC_C100033032	Protein of unknown function DUF668
			JC_C100015368	Protein of unknown function DUF2049
			JC_C100007925	-
			JC_C100022856	Protein of unknown function DUF620
			JC_C100004211	Spc97/Spc98
			JC_C100026562	SPla/RYanodine receptor SPRY IPR018355; SPla/RYanodine receptor subgroup
			JC_C100017638	UDP-glucuronosyl/UDP-glucosyltransferase
			JC_C100011857	Pollen Ole e 1 allergen/extensin IPR006706; Extensin-like repeat
			JC_C100033003	Cytochrome P450
			JC_C100010721	Heat shock protein DnaJ, cysteine-rich region
			JC_C100011936	-
			JC_C100012525	ATPase, AAA+ type, core IPR003959; ATPase, AAA-type, core
			JC_C100004136	Aminotransferase, class I/II IPR015424; Pyridoxal phosphate-dependent transferase, major region
			JC_C100016143	GO:0043231//intracellular membrane-bounded organelle
			JC_C100024909	Ran GTPase IPR003577; Ras small GTPase, Ras type IPR003578; Ras small GTPase, Rho type IPR003579; Ras small GTPase, Rab type IPR013753; Ras
			JC_C100009347	Protein kinase, catalytic domain IPR001611; Leucine-rich repeat IPR002290; Serine/threonine-protein kinase domain IPR011009; Protein kinase-like domain IPR013210; Leucine-rich repeat, N-terminal IPR017442; Serine/threonine-protein kinase-like domain IPR020635; Tyrosine-protein kinase, subgroup, catalytic domain
			JC_C100019073	Armadillo IPR002652; Importin-alpha-like, importin-beta-binding region IPR016024; Armadillo-type fold
			JC_C100012814	Methyltransferase type 11
			JC_C100031774	Protein kinase, catalytic domain IPR002290; Serine/threonine-protein kinase domain IPR011009; Protein kinase-like domain IPR017442; Serine/threonine-protein kinase-like domain IPR020635; Tyrosine-protein kinase, subgroup, catalytic domain
			JC_C100012364	Conserved hypothetical protein CHP00730
			JC_C100017116	Alpha/beta hydrolase fold-1
			JC_C100020953	MYB-like
			JC_C100000413	Kinesin, motor region
			JC_C100007303	Protein kinase, catalytic domain IPR001611; Leucine-rich repeat IPR002290; Serine/threonine-protein kinase domain IPR011009; Protein kinase-like domain IPR017442; Serine/threonine-protein kinase-like domain IPR020635; Tyrosine-protein kinase, subgroup, catalytic domain
			JC_C100011525	Protein of unknown function DUF6, transmembrane
			JC_C100018094	Cation/H+ exchanger
			JC_C100019428	Protein kinase, catalytic domain IPR002290; Serine/threonine-protein kinase domain IPR011009; Protein kinase-like domain IPR017442; Serine/threonine-protein kinase-like domain IPR020635; Tyrosine-protein kinase, subgroup, catalytic domain
			JC_C100012205	Protein kinase, catalytic domain IPR002290; Serine/threonine-protein kinase domain IPR011009; Protein kinase-like domain IPR017442; Serine/threonine-protein kinase-like domain IPR020635; Tyrosine-protein kinase, subgroup, catalytic domain
			JC_C100018363	RNA polymerase III Rpc82, C -terminal IPR013197; RNA polymerase III subunit RPC82-related, helix-turn-helix
			JC_C100019382	-
			JC_C100008581	Spc97/Spc98
			JC_C100010855	Protein of unknown function DUF668
			JC_C100008985	Oxoglutarate/iron-dependent oxygenase
			JC_C100018483	Protein kinase, catalytic domain IPR001611; Leucine-rich repeat IPR002290; Serine/threonine-protein kinase domain IPR003591; Leucine-rich repeat, typical subtype IPR011009; Protein kinase-like domain IPR013210; Leucine-rich repeat, N-terminal IPR017442; Serine/threonine-protein kinase-like domain IPR020635; Tyrosine-protein kinase, subgroup, catalytic domain
			JC_C100006752	NSF attachment protein
			JC_C100000145	GTP-binding protein, HSR1-related
			JC_C100015675	Glutaredoxin IPR012336; Thioredoxin-like fold
			JC_C100003674	Protein kinase, catalytic domain IPR002290; Serine/threonine-protein kinase domain IPR011009; Protein kinase-like domain IPR017442; Serine/threonine-protein kinase-like domain IPR020635; Tyrosine-protein kinase, subgroup, catalytic domain
			JC_C100007182	Protein of unknown function DUF26
			JC_C100004603	Alpha/beta hydrolase fold-1
			JC_C100012118	Excinuclease ABC, C subunit, N-terminal
			JC_C100021789	BSD
			JC_C100006548	Cyclin-like F-box IPR006652; Kelch repeat type 1 IPR011043; Galactose oxidase/kelch, beta-propeller
			JC_C100012610	Ankyrin repeat IPR020683; Ankyrin repeat-containing domain
			JC_C100024856	Transcription factor, FAR1-related IPR006564; Zinc finger, PMZ-type IPR007527; Zinc finger, SWIM-type IPR018289; MULE transposase, conserved domain
			JC_C100008542	-
			JC_C100021890	Alpha/beta hydrolase fold-1
			JC_C100008361	-
			JC_C100002259	Cytochrome P450
			JC_C100004590	-
			JC_C100010365	Drought induced 19
			JC_C100000753	Zinc finger, CCHC-type IPR010666; Zinc finger, GRF-type
			JC_C100023326	GO:0043231//intracellular membrane-bounded organelle
			JC_C100010790	-
			JC_C100019037	SANT, DNA-binding IPR009057; Homeodomain-like IPR014778; Myb, DNA-binding IPR017930; Myb-type HTH DNA-binding domain
			JC_C100018230	Phosphoesterase
			JC_C100016200	-
			JC_C100016532	BTB/POZ-like IPR004249; NPH3 IPR011333; BTB/POZ fold IPR013069; BTB/POZ
			JC_C100024247	Spc97/Spc98
			JC_C100004316	Zinc finger, BED-type predicted IPR008906; HAT dimerisation
			JC_C100016393	Ankyrin repeat IPR020683; Ankyrin repeat-containing domain
			JC_C100014131	ABC transporter-like IPR003593; ATPase, AAA+ type, core
			JC_C100023830	Protein kinase, catalytic domain IPR001611; Leucine-rich repeat IPR002290; Serine/threonine-protein kinase domain IPR003591; Leucine-rich repeat, typical subtype IPR011009; Protein kinase-like domain IPR013210; Leucine-rich repeat, N-terminal IPR017442; Serine/threonine-protein kinase-like domain IPR020635; Tyrosine-protein kinase, subgroup, catalytic domain
			JC_C100006177	-
			JC_C100023990	Cytochrome P450
			JC_C100014632	Transcription factor CBF/NF-Y/archaeal histone IPR009072; Histone-fold
			JC_C100008790	SANT, DNA-binding IPR001965; Zinc finger, PHD-type IPR009057; Homeodomain-like IPR011011; Zinc finger, FYVE/PHD-type IPR017930; Myb-type HTH DNA-binding domain IPR019787; Zinc finger, PHD-finger
			JC_C100024064	Forkhead-associated IPR008984; SMAD/FHA domain
			JC_C100022894	Serine/cysteine peptidase, trypsin-like
			JC_C100007022	Glucose-6-phosphate dehydrogenase IPR016040; NAD(P)-binding domain
			JC_C100025925	Homeodomain-like
			JC_C100014372	Short-chain dehydrogenase/reductase SDR IPR016040; NAD(P)-binding domain
			JC_C100012406	Ran GTPase IPR003577; Ras small GTPase, Ras type IPR003578; Ras small GTPase, Rho type IPR003579; Ras small GTPase, Rab type IPR006688; ADP-ribosylation factor IPR013753; Ras
			JC_C100024562	Short-chain dehydrogenase/reductase SDR IPR016040; NAD(P)-binding domain
			JC_C100008673	-
			JC_C100023813	Glycoside hydrolase, family 28 IPR006626; Parallel beta-helix repeat IPR011050; Pectin lyase fold/virulence factor
			JC_C100004389	Armadillo IPR003613; U box domain IPR016024; Armadillo-type fold
			JC_C100007576	General substrate transporter IPR016196; Major facilitator superfamily, general substrate transporter
			JC_C100015664	Structure-specific recognition protein
			JC_C100021401	Tetraspanin
			JC_C100000759	-
			JC_C100006095	Metal-dependent phosphohydrolase, HD region IPR004095; TGS IPR006674; Metal-dependent phosphohydrolase, HD region, subdomain IPR007685; RelA/SpoT
			JC_C100013897	RabGAP/TBC
			JC_C100012491	Amidohydrolase 1 IPR011059; Metal-dependent hydrolase, composite domain
			JC_C100024410	RNA recognition motif, RNP-1
			JC_C100021882	Pentatricopeptide repeat
			JC_C100013909	Glycoside hydrolase, family 17 IPR017853; Glycoside hydrolase, catalytic core
			JC_C100013559	Amino acid transporter, transmembrane
			JC_C100023409	BURP
			JC_C100024420	PAK-box/P21-Rho-binding IPR000198; RhoGAP IPR008936; Rho GTPase activation protein
			JC_C100009483	-
			JC_C100016618	Cyclic nucleotide-binding IPR005821; Ion transport IPR018490; Cyclic nucleotide-binding-like
			JC_C100013252	-
			JC_C100025664	GO:0043231//intracellular membrane-bounded organelle
			JC_C100007460	Autophagy-related protein 5
			JC_C100020544	IQ calmodulin-binding region
			JC_C100007762	Protein of unknown function DUF1336
			JC_C100003981	Dual specificity phosphatase, catalytic domain IPR000387; Dual-specific/protein-tyrosine phosphatase, conserved region IPR020422; Dual specificity phosphatase, subgroup, catalytic domain
			JC_C100026278	UDP-glucuronosyl/UDP-glucosyltransferase
			JC_C100001799	UBX IPR006577; UAS
			JC_C100025735	Protein kinase, catalytic domain IPR000961; AGC-kinase, C-terminal IPR002290; Serine/threonine-protein kinase domain IPR011009; Protein kinase-like domain IPR017442; Serine/threonine-protein kinase-like domain IPR017892; Protein kinase, C-terminal IPR020635; Tyrosine-protein kinase, subgroup, catalytic domain
			JC_C100021192	Defects in morphology protein 1-like
			JC_C100015562	Auxin efflux carrier
			JC_C100020622	Pathogenesis-related transcriptional factor/ERF, DNA-binding IPR016177; DNA-binding, integrase-type
			JC_C100017485	DNA-directed DNA polymerase, family B, exonuclease domain IPR006134; DNA-directed DNA polymerase, family B, conserved region IPR006172; DNA-directed DNA polymerase, family B IPR012337; Polynucleotidyl transferase, ribonuclease H fold IPR015088; Zinc finger, DNA-directed DNA polymerase, family B, alpha
			JC_C100007738	Amino acid transporter, transmembrane
			JC_C100006039	Protein of unknown function DUF292, eukaryotic
			JC_C100019653	Methyltransferase type 11
			JC_C100013830	Target SNARE coiled-coil region IPR006011; Syntaxin, N-terminal IPR010989; t-SNARE
			JC_C100024290	-
			JC_C100009955	DNA polymerase alpha/epsilon, subunit B
			JC_C100019283	Protein kinase-like domain IPR017442; Serine/threonine-protein kinase-like domain
			JC_C100001099	ATPase, AAA+ type, core IPR003959; ATPase, AAA-type, core
			JC_C100008971	Pentatricopeptide repeat
			JC_C100000205	Basic helix-loop-helix dimerisation region bHLH IPR011598; Helix-loop-helix DNA-binding
			JC_C100008787	Mitochodrial transcription termination factor-related
			JC_C100008399	-
			JC_C100015174	Heat shock factor (HSF)-type, DNA-binding
			JC_C100022101	UDP-glucuronosyl/UDP-glucosyltransferase
			JC_C100007755	Pectinesterase, catalytic IPR011050; Pectin lyase fold/virulence factor
			JC_C100010574	GO:0031410//cytoplasmic vesicle
			JC_C100021446	Protein-tyrosine phosphatase-like, PTPLA
			JC_C100016627	CoA-binding IPR005811; ATP-citrate lyase/succinyl-CoA ligase IPR016040; NAD(P)-binding domain IPR016102; Succinyl-CoA synthetase-like
			JC_C100015047	Glycoside hydrolase, family 47
			JC_C100008199	GO:0016020//membrane
			JC_C100018036	Pectinacetylesterase
			JC_C100020212	Acid phosphatase (Class B)
			JC_C100006400	Toll-Interleukin receptor IPR002182; NB-ARC
			JC_C100011244	Amino acid transporter, transmembrane
			JC_C100025488	Tesmin/TSO1-like, CXC
			JC_C100001027	Transcription factor jumonji/aspartyl beta-hydroxylase IPR013129; Transcription factor jumonji IPR014977; WRC
			JC_C100023096	-
			JC_C100017863	Kinesin, motor region
			JC_C100012096	RNA polymerase sigma-70 region 3 IPR007627; RNA polymerase sigma-70 region 2 IPR007630; RNA polymerase sigma-70 region 4 IPR013324; RNA polymerase sigma factor, region 3/4 IPR013325; RNA polymerase sigma factor, region 2
			JC_C100023267	Cyclin-dependent kinase inhibitor
			JC_C100010116	BRO1
			JC_C100019035	XPG N-terminal IPR006086; XPG I IPR008918; Helix-hairpin-helix motif, class 2 IPR020045; 5'-3' exonuclease, C-terminal subdomain
			JC_C100011789	Kinesin, motor region
			JC_C100015326	GRAS transcription factor
			JC_C100013653	BRCT
			JC_C100006652	Tubulin/FtsZ, GTPase domain IPR008280; Tubulin/FtsZ, C-terminal IPR018316; Tubulin/FtsZ, 2-layer sandwich domain IPR019746; Tubulin/FtsZ, N-terminal
			JC_C100013882	DNA/RNA helicase, C-terminal IPR011545; DNA/RNA helicase, DEAD/DEAH box type, N-terminal IPR014001; DEAD-like helicase, N-terminal IPR014014; RNA helicase, DEAD-box type, Q motif
			JC_C100010292	Kinesin, motor region IPR010544; Kinesin-related
			JC_C100012341	Armadillo IPR016024; Armadillo-type fold
			JC_C100011362	WW/Rsp5/WWP IPR019012; RNA cap guanine-N2 methyltransferase
			JC_C100009858	Ribonuclease T2
			JC_C100021853	Quinoprotein amine dehydrogenase, beta chain-like IPR017986; WD40-repeat-containing domain IPR019782; WD40 repeat 2
			JC_C100006279	Glycoside hydrolase, family 16 IPR008985; Concanavalin A-like lectin/glucanase IPR010713; Xyloglucan endo-transglycosylase, C-terminal
			JC_C100006641	GO:0043231//intracellular membrane-bounded organelle
			JC_C100017225	Protein of unknown function DUF793
			JC_C100023789	GO:0043231//intracellular membrane-bounded organelle
			JC_C100008150	Phosphatidic acid phosphatase type 2/haloperoxidase
			JC_C100018318	Reticulon
			JC_C100013428	Asp/Glu racemase
			JC_C100017820	Protein of unknown function DUF2419
			JC_C100006483	Amino acid transporter, transmembrane
			JC_C100012059	DNA topoisomerase, type IIA, subunit B or N-terminal IPR002205; DNA topoisomerase, type IIA, subunit A or C-terminal IPR003594; ATP-binding region, ATPase-like IPR013506; DNA topoisomerase, type IIA, subunit B, region 2 IPR013760; DNA topoisomerase, type IIA, central IPR020568; Ribosomal protein S5 domain 2-type fold
			JC_C100010780	Homeobox IPR009057; Homeodomain-like
			JC_C100011816	Protein prenyltransferase, alpha subunit
			JC_C100022320	Protein kinase-like domain
			JC_C100020649	Protein phosphatase 2C-related IPR014045; Protein phosphatase 2C, N-terminal
			JC_C100013258	Protein kinase, catalytic domain IPR001611; Leucine-rich repeat IPR002290; Serine/threonine-protein kinase domain IPR003591; Leucine-rich repeat, typical subtype IPR011009; Protein kinase-like domain IPR017442; Serine/threonine-protein kinase-like domain IPR020635; Tyrosine-protein kinase, subgroup, catalytic domain
			JC_C100004180	D111/G-patch
			JC_C100022603	DNA-binding WRKY
			JC_C100023028	Protein of unknown function DUF220
			JC_C100010671	Rop nucleotide exchanger, PRONE IPR012559; Erythromycin resistance leader peptide-2
			JC_C100017939	Tetratricopeptide TPR-1 IPR001623; Heat shock protein DnaJ, N-terminal IPR013026; Tetratricopeptide region IPR019734; Tetratricopeptide repeat
			JC_C100017412	Polyprenyl synthetase IPR008949; Terpenoid synthase
			JC_C100022055	Zinc finger, C2HC5-type
			JC_C100026597	Protein kinase, catalytic domain IPR001611; Leucine-rich repeat IPR002290; Serine/threonine-protein kinase domain IPR003591; Leucine-rich repeat, typical subtype IPR011009; Protein kinase-like domain IPR013210; Leucine-rich repeat, N-terminal IPR017442; Serine/threonine-protein kinase-like domain IPR020635; Tyrosine-protein kinase, subgroup, catalytic domain
			JC_C100005590	Protein of unknown function DUF231, plant
			JC_C100017400	Zinc finger, C2H2-type IPR015880; Zinc finger, C2H2-like
			JC_C100021263	Protein kinase, catalytic domain IPR002290; Serine/threonine-protein kinase domain IPR003613; U box domain IPR011009; Protein kinase-like domain IPR017442; Serine/threonine-protein kinase-like domain IPR020635; Tyrosine-protein kinase, subgroup, catalytic domain
			JC_C100008285	Homeobox IPR005539; ELK IPR005540; KNOX1 IPR005541; KNOX2 IPR009057; Homeodomain-like
			JC_C100011993	Protein of unknown function DUF594
			JC_C100018385	Peptidase C12, ubiquitin carboxyl-terminal hydrolase 1
			JC_C100032226	Metallophosphoesterase
			JC_C100000032	Phosphatidylinositol-4-phosphate 5-kinase, core IPR003409; MORN motif IPR016034; Phosphatidylinositol-4-phosphate 5-kinase, core, subgroup
			JC_C100021764	-
			JC_C100014725	GO:0009534//chloroplast thylakoid
			JC_C100018135	RecF/RecN/SMC protein, N-terminal IPR010935; SMCs flexible hinge
			JC_C100015444	Oxoglutarate/iron-dependent oxygenase
			JC_C100009410	Haem peroxidase, plant/fungal/bacterial IPR010255; Haem peroxidase
			JC_C100016181	Chalcone/stilbene synthase, N-terminal IPR012328; Chalcone/stilbene synthase, C-terminal IPR016039; Thiolase-like
[truncated: 354 more rows]

## Sheet: Cluster 2
Cluster 2	N=1159 genes
[truncated: 1,160 more rows]

## Sheet: Cluster 3
Cluster 3	N=621 genes
[truncated: 622 more rows]

[truncated: 5 more sheets: Cluster 4, Cluster 5, Cluster 6, Cluster 7, Cluster 8]
