# Supplementary material for: Global Analysis of Gene Expression Profiles in Developing Physic Nut (Jatropha curcas L.) Seeds
Source: PLoS One. 2012 May 4;7(5):e36522. doi: 10.1371/journal.pone.0036522 (PMC3344900; doi:10.1371/journal.pone.0036522)
Supplement: Table S2 — Genes and their expression levels at the seven stages indicated in Figures 3 , 4 , and 5 . (XLS) [file pone.0036522.s009.xls]

## Sheet: Sheet1
Table S2. Genes and their expression levels at the seven stages indicated in Figures 3–5.																		lonS1	logS2	logS3	logS4	logS5	logS6	logS7
	(--) not available
		Gene ID	Manule annotation	log2(TPM) of S1	log2(TPM) of S2	log2(TPM) of S3	log2(TPM) of S4	log2(TPM) of S5	log2(TPM) of S6	log2(TPM) of S7
Figure 3	Figure 3A Suc indirect import pathway	JC_C100009329	cwINV, cell-wall invertase	--	-0.599462	--	3.35473	0.963474	--	--
		JC_C100020497	cwINV, cell-wall invertase	4.93074	4.40054	5.23458	2.53854	--	--	0.9855
		JC_C100025743	cwINV, cell-wall invertase	2.30743	2.72247	3.94298	1.31615	-0.915936	--	--
		JC_C100009119	STP, sugar transport protein	7.76069	6.8802	6.49169	4.33557	4.28244	4.38543	-0.599462
		JC_C100000725	PLT, polyol transporter	--	--	-1.12029	4.31615	5.9479	0.0285692	4.78293
		JC_C100025471	PLT, polyol transporter	2.06005	1.85997	-0.535332	2.66903	3.02503	2.99639	3.54844
	Figure 3B Suc derect import pathway	JC_C100001823	SUT, sucrose transporter	2.70487	2.30743	3.854	3.35473	1.40599	1.96717	1.20789
		JC_C100022541	SUT, sucrose transporter	4.70432	4.25852	4.70984	3.90111	3.38405	3.41954	2.56803
		JC_C100022782	SUT, sucrose transporter	6.31288	7.54249	7.43346	6.50779	2.85798	2.83592	3.60881
		JC_C100010353	SUSY, sucrose synthase	2.64616	1.20789	2.19849	9.85709	11.0572	7.29287	4.20633
		JC_C100024259	SUSY, sucrose synthase	7.98356	8.59272	9.26714	6.85325	5.02414	5.99729	7.13391
		JC_C100025110	SUSY, sucrose synthase	9.50631	8.46246	9.67867	7.02846	5.48929	4.90207	3.12763
		JC_C100003749	nINV, neutral/alkaline invertases	4.64501	6.50367	6.0468	5.70819	3.35896	3.70929	3.39917
		JC_C100033832	nINV, neutral/alkaline invertases	--	--	-0.535332	2.23266	2.35896	1.25096	-0.599462
		JC_C100005173	nINV, neutral/alkaline invertases	5.17911	5.63894	6.03188	6.73457	6.06307	4.68089	-1.02915
		JC_C100005881	nINV, neutral/alkaline invertases	3.96717	3.9241	4.38474	2.84599	2.25701	2.488	3.23266
		JC_C100021041	nINV, neutral/alkaline invertases	3.48671	3.52982	4.0063	0.956057	2.58736	2.14405	2.56803
		JC_C100010421	nINV, neutral/alkaline invertases	6.41785	4.42291	5.14364	3.0036	4.91839	4.15704	4.90689
		JC_C100018717	nINV, neutral/alkaline invertases	3.64501	4.52982	4.78398	4.39369	2.14405	2.80116	4.04352
		JC_C100007500	UGPP, UDP-glucose pyrophosphorylase	6.20496	9.01698	8.30113	9.6347	9.12691	8.17991	7.94808
		JC_C100014452	UGPP, UDP-glucose pyrophosphorylase	5.94907	5.05875	4.9644	4.14568	5.2149	4.78241	4.59872
	Figure 3C Sugar-phosphate transport	JC_C100019452	GPT, Glc-6-P/phosphate translocator	7.6987	7.90821	8.12608	8.21062	8.23204	7.09729	5.82553
		JC_C100014296	XPT, xylulose 5-phosphate/phosphate translocator.	2.14731	3.64847	2.9222	3.14568	2.5008	0.765535	--
		JC_C100021622	PPT, phosphoenolpyruvate/phosphate translocator	6.14771	5.23343	6.00113	5.81121	6.22516	5.56682	3.93829
		JC_C100026660	TPT, triose phosphate/phosphate translocator	5.54411	5.84348	6.23898	5.22265	5.56682	4.48736	3.774
		JC_C100013456	NTT, ATP/ADP transporter (Adenine nucleotide translocase)	5.2891	7.19486	6.56697	7.25965	5.6094	5.67638	7.12547
Figure 4	Figure 4A Plastid glycolysis metabolic pathway	JC_C100022348	PGI, phosphoglucose isomerase, Plastid	8.40344	7.82877	7.86282	7.96446	8.40837	6.87517	5.33593
		JC_C100018091	PGM, phosphoglucomutase, Plastid	6.95513	7.22381	6.35667	6.62571	6.96428	5.15015	5.09972
		JC_C100009421	PFK, 6-phosphofructokinase, Plastid	5.06005	3.89239	5.1807	3.84599	4.1152	3.52982	1.9222
		JC_C100025529	PFK, 6-phosphofructokinase, Plastid	6.18963	6.61471	7.00888	4.63749	2.25701	4.2502	4.07125
		JC_C100005247	FBPA, fructose-bisphosphate aldolase, Plastid	3.51979	2.30743	2.52105	4.99141	5.96832	5.34944	8.81868
		JC_C100015875	FBPA, fructose-bisphosphate aldolase, Plastid	7.71308	6.13504	7.35676	6.03452	8.04182	6.97991	4.96901
		JC_C100005826	GAPD, glyceraldehyde 3-phosphate dehydrogenase, Plastid	8.03612	7.85162	7.83983	9.95161	8.91701	7.97108	6.94416
		JC_C100005831	PGK, phosphoglycerate kinase, Plastid	7.48864	7.77762	6.36072	8.23864	6.69544	5.60763	5.25739
		JC_C100007378	ENO, enolase, Plastid	6.70418	6.04418	5.75355	7.19298	7.38336	6.57713	3.60881
		JC_C100000294	PGLM, phosphoglycerate mutase, Plastid	4.46989	3.95513	4.12516	6.42206	7.27221	6.76686	0.722466
		JC_C100008944	PGLM, phosphoglycerate mutase, Plastid	4.50335	4.60999	4.67129	5.10014	6.64544	4.90207	1.57046
		JC_C100005490	PGLM, phosphoglycerate mutase, Plastid	2.8679	3.40054	2.7845	5.26491	5.33985	3.67129	0.201634
		JC_C100001649	PK, pyruvate kinase, Plastid	6.21004	7.23333	7.4025	5.96602	6.92279	6.92446	6.92077
		JC_C100014720	PK, pyruvate kinase, Plastid	4.84147	6.56529	6.85425	7.32076	6.36492	6.55382	6.87897
	Figure 4B Cytosol glycolysis metabolic pathway	JC_C100025551	HK, hexokinase	4.50335	5.15543	5.98025	6.53387	5.54504	5.73715	6.01033
		JC_C100004853	FK, fructose kinase	9.1444	8.75465	8.59548	6.51223	7.20809	7.40701	4.48671
		JC_C100011457	PGI, phosphoglucose isomerase	7.58383	5.93168	7.17163	6.79688	9.4873	8.77916	8.57664
		JC_C100015137	PGM, phosphoglucomutase	7.17143	6.8475	8.17158	7.05279	8.03017	7.55635	7.11863
		JC_C100016388	PFK, 6-phosphofructokinase.	1.76129	2.9855	2.12433	7.08842	7.03793	6.86047	7.94808
		JC_C100013716	FBPA, fructose-bisphosphate aldolase	8.59163	10.5352	10.2661	11.0707	9.42815	9.01865	8.6418
		JC_C100021863	GAPD, glyceraldehyde 3-phosphate dehydrogenase	10.1203	11.1084	11.6745	10.5045	10.0833	9.73784	10.1493
		JC_C100005830	PGK, phosphoglycerate kinase	6.96116	8.04789	7.50088	7.71383	7.92493	6.70002	7.46801
		JC_C100006119	PGLM, phosphoglycerate mutase	8.47281	7.37199	8.16581	7.2465	7.64667	6.44543	5.46009
		JC_C100018105	ENO, enolase	8.87964	9.80395	8.59462	9.15919	8.16787	7.95733	8.30761
		JC_C100018106	ENO, enolase	7.53395	9.48854	8.20227	9.37289	8.00753	6.07916	5.01391
		JC_C100012427	PK, pyruvate kinase	7.30104	8.31329	8.32818	9.6017	7.51199	6.62498	6.62804
		JC_C100020848	PK, pyruvate kinase	5.90569	7.24907	7.00371	8.62768	9.10345	7.20252	6.39077
		JC_C100020298	PK, pyruvate kinase	7.87566	7.76454	8.20227	7.93375	7.57886	6.54859	6.53372
	Figure 4C The oxidative pentose phosphate pathway	JC_C100018710	G6PD, glucose-6-phosphate dehydrogenase	4.70432	4.74039	5.32805	2.90111	5.89312	5.74174	4.46532
		JC_C100023177	G6PD, glucose-6-phosphate dehydrogenase	4.50335	4.10098	4.53543	4.99141	5.60407	5.05745	2.75702
		JC_C100001381	PGL, 6-phosphogluconolactonase	7.81513	8.93472	7.44493	9.22867	9.84281	9.55378	9.72002
		JC_C100007261	6-PGD, 6-phosphogluconate dehydrogenase	6.74672	7.38059	8.42	6.55105	7.2556	5.10811	3.20633
		JC_C100016903	6-PGD, 6-phosphogluconate dehydrogenase	7.01156	6.05137	6.9241	7.61956	9.51475	8.7786	6.41329
		JC_C100019285	RPI , ribose 5-phosphate isomerase	6.56803	6.83504	6.42391	6.36982	5.18706	5.08661	2.89142
		JC_C100004253	PRS, ribose-phosphate pyrophosphokinase	6.18448	3.35473	5.34447	2.78869	5.27538	5.25626	4.8339
		JC_C100013102	RPE, D-ribulose-5-phosphate 3-epimerase	6.48655	5.93946	6.49905	7.01	6.6014	6.36159	6.40207
		JC_C100021723	RPE, D-ribulose-5-phosphate 3-epimerase	4.06005	4.84348	4.94298	3.23266	3.60881	2.53107	3.62761
		JC_C100024634	TRANSKETOLASE	6.79494	7.88826	7.13904	8.3332	7.35094	6.37626	8.57664
		JC_C100017353	TRANSADOLASE	5.70404	6.64357	4.9855	8.29815	8.73135	7.53013	6.30012
		JC_C100018988	TRANSADOLASE	6.07703	6.283	6.10098	7.82184	8.18809	7.15005	6.12722
	Figure 4D C3-C4 intermediary metabolism pathway	JC_C100005329	PEPC, Phosphoenolpyruvate carboxylase	6.05463	5.33128	5.79572	6.14017	6.2149	6.07211	3.79181
		JC_C100001611	PEPC, Phosphoenolpyruvate carboxylase	5.59932	5.04439	5.51349	6.81826	6.52027	6.72342	6.4573
		JC_C100010102	PEPC, Phosphoenolpyruvate carboxylase	5.89942	7.24907	6.60481	7.89742	7.15714	4.67129	1.30451
		JC_C100015007	MDH, malate dehydrogenase	9.56756	9.05683	10.2023	9.02467	9.36995	8.1816	8.4707
		JC_C100020590	DIT, dicarboxylic acid tranlocator	3.26903	3.9241	3.92125	5.82528	6.10056	4.76447	1.79077
		JC_C100017907	DIT, dicarboxylic acid tranlocator	6.2891	6.2077	5.46956	6.60125	6.18031	5.30049	2.9222
		JC_C100020554	ME, malic enzyme	8.11692	8.48655	7.35676	9.16614	9.15985	8.34199	7.47606
Figure 5	Figure 5A Starch synthesis pathway	JC_C100011490	AGPL, ADP–glucose pyrophosphorylase large subunit	4.50335	5.35473	3.83086	4.50335	3.74846	3.69042	1.79077
		JC_C100015930	AGPL, ADP–glucose pyrophosphorylase large subunit	7.07425	4.97039	6.40837	2.23266	4.74846	4.32553	2.89142
		JC_C100009747	AGPS, ADP–glucose pyrophosphorylase small subunit	6.72206	6.47719	6.63851	6.33074	5.26903	5.25626	5.70293
		JC_C100017121	GBSSII, granule-bound starch synthase II	7.44178	6.96266	7.42962	3.81865	1.5008	3.27501	5.10643
		JC_C100002010	SSI, starch synthase I	3.84197	4.70432	4.35262	2.66903	1.89142	0.250962	0.565597
		JC_C100007740	SSII , starch synthase II	6.0027	5.19495	5.93216	3.14568	2.40871	3.37295	2.44361
		JC_C100026482	SSIII, starch synthase III	5.44394	5.38922	6.0766	3.66903	1.95977	1.96717	0.201634
		JC_C100003383	SSVI, starch synthase VI	4.16912	5.04439	5.04701	4.91409	3.28244	4.28836	4.51791
		JC_C100015248	SSIV, starch synthase IV	4.64501	4.04439	5.27798	5.31578	4.04002	3.27501	2.40054
		JC_C100017866	SSV, starch synthase V	4.36387	3.72247	4.78398	3.53854	3.2555	2.90304	2.10098
		JC_C100010629	BEI, starch branching enzyme I	6.54009	6.06566	7.24327	4.25475	4.93546	4.48736	4.89918
		JC_C100013750	BEII, starch branching enzyme II	5.96717	5.69516	5.80761	8.09276	5.6453	5.55121	5.47606
		JC_C100015786	ISA1, isoamylase 1	4.38198	4.97039	5.32805	4.87381	2.74846	2.3978	0.85599
		JC_C100026401	ISA2, isoamylase 2	4.84147	4.07296	4.81967	4.52105	3.05485	2.57289	2.10098
		JC_C100022328	ISA3, isoamylase 3	4.53605	5.72247	5.97499	4.37434	3.20163	3.93452	3.8748
		JC_C100004405	PUL, pullulanase	2.91839	3.20789	3.08576	2.90111	3.2555	2.57289	1.40054
	Figure 5B Starch breakdown genes of α-amylase (AMY) and β-amylase (BAM)	JC_C100016856	BAM, β-amylase	1.96717	2.40054	2.52105	0.731183	-0.915936	0.613532	-1.59946
		JC_C100014576	BAM, β-amylase	5.63778	5.52982	5.64501	6.04067	5.70044	6.71411	5.37086
		JC_C100019843	BAM, β-amylase	4.70432	5.2709	4.86542	5.07639	2.89336	2.80116	3.25701
		JC_C100003540	BAM, β-amylase	3.61471	2.79286	4.57713	1.73118	2.99277	2.30159	2.30743
		JC_C100007151	BAM, β-amylase	4.43563	4.77558	5.36072	3.81865	2.74846	0.0285692	2.60881
		JC_C100024003	BAM, β-amylase	3.94298	4.04439	4.21645	3.23266	2.82171	2.02857	2.10098
		JC_C100002332	BAM, β-amylase	5.93687	5.64847	5.04701	5.56377	5.33985	5.3733	5.37643
		JC_C100024001	BAM, β-amylase	5.63023	4.87627	5.50621	4.23343	3.5008	2.99639	2.40054
		JC_C100008238	AMY, α-amylase	6.77109	7.08343	6.03188	6.70432	5.98459	5.43696	5.73904
		JC_C100026761	AMY, α-amylase	3.67469	4.20789	3.854	1.14405	1.31034	2.02857	2.15381
		JC_C100010812	AMY, α-amylase	4.14812	2.30743	4.12516	0.15056	-0.184425	-0.234465	-0.0144996
		JC_C100011196	AMY, α-amylase	0.0565835	0.9855	0.464668	1.60407	4.18745	4.02768	3.04264
	Figure 5C Fatty acid synthesis pathway	JC_C100009668	a-CT, (CAC3) a-Carboxyltransferase of Heteromeric ACCase	6.31759	6.32517	6.91037	6.73836	7.4031	6.56163	4.7301
		JC_C100023207	BCCP, Biotin Carboxyl Carrier Protein of Heteromeric ACCase	6.82845	5.87603	5.21684	7.19298	8.97697	7.86888	5.95373
		JC_C100002832	BC, Biotin Carboxylase of Heteromeric ACCase	5.81506	4.87627	5.72874	5.37469	6.24888	5.43696	1.64616
		JC_C100016583	MCMT, Malonyl-CoA : ACP Malonyltransferase	5.98504	6.46107	6.30743	7.66548	7.39558	7.0332	4.91504
		JC_C100015043	KASI, Ketoacyl-ACP Synthase I	4.89336	4.9241	6.14853	5.90737	5.33378	4.95047	3.774
		JC_C100025666	KASII, Ketoacyl-ACP Synthase II	3.48671	4.74039	4.12516	7.05875	5.72955	5.04264	3.42223
		JC_C100017355	KASIII, Ketoacyl-ACP Synthase III	3.89336	5.16872	4.63169	6.12887	6.05528	6.5694	4.45483
		JC_C100023132	KAR, Plastidial Ketoacyl-ACP Reductase	4.53605	4.52982	4.38474	6.20653	6.86047	6.03144	1.9222
		JC_C100002015	KAR, Plastidial Ketoacyl-ACP Reductase	5.40905	5.45582	5.43162	3.95327	3.89336	3.16993	2.30743
		JC_C100007167	HAD, Plastidial Hydroxyacyl-ACP Dehydrase	3.14731	2.85997	4.06695	4.16832	5.89312	4.05745	-1.02915
		JC_C100002518	ER, Plastidial Enoyl-ACP Reductase	6.60718	4.68594	5.57046	3.92695	5.37121	4.44294	3.774
		JC_C100004236	ER, Plastidial Enoyl-ACP Reductase	8.09645	7.01881	6.60481	9.66354	10.0758	9.21371	4.96901
		JC_C100021481	SAD, Stearoyl-ACP Desaturase	5.95513	7.67186	7.23888	8.20252	7.43446	6.91839	5.98048
		JC_C100023235	SAD, Stearoyl-ACP Desaturase	4.93074	5.95489	5.91049	8.24916	6.73674	7.07382	6.79364
		JC_C100023234	SAD, Stearoyl-ACP Desaturase	3.22959	2.10098	1.33914	6.57213	6.68804	3.67129	--
		JC_C100011041	SAD, Stearoyl-ACP Desaturase	3.22959	4.04439	4.52105	8.58984	8.66188	8.49997	--
		JC_C100019248	ACP, Plastidial Acyl Carrier Protein	5.57592	7.39763	7.76421	8.91073	9.56211	8.85574	5.77426
		JC_C100014578	ACP, Plastidial Acyl Carrier Protein	6.96116	6.56529	6.11541	8.6397	11.2094	10.0414	8.20418
		JC_C100022895	FatA , Acyl-ACP Thioesterase	5.97315	5.68594	5.74739	9.3139	9.57588	8.90207	5.22574
		JC_C100013836	FatB , Acyl-ACP Thioesterase	6.08257	7.03342	7.1921	6.32085	4.26903	4.51916	2.68482
		JC_C100024404	E1a of PDHC, Plastidial Pyruvate Dehydrogenase E1a of Pyruvate DH Complex	5.93074	6.12143	6.46189	6.25437	7.37112	7.10087	4.8339
		JC_C100026263	E1a of PDHC, Plastidial Pyruvate Dehydrogenase E1a of Pyruvate DH Complex	6.03188	5.51948	6.23898	4.27501	4.51223	4.74631	6.76341
		JC_C100015269	E1b of PDHC , Pyruvate Dehydrogenase E1b of PDHC	6.51554	6.8098	6.56697	6.76792	7.55328	6.6175	3.23266
		JC_C100010067	HDLAT, Dihydrolipoamide Acetyltransferase of PDHC	5.20984	6.19476	5.48414	7.82005	7.75929	6.69056	5.02148
		JC_C100004140	HDLAT, Dihydrolipoamide Acetyltransferase of PDHC	4.46989	4.04439	4.38474	3.60526	4.56682	4.08661	1.9222
		JC_C100005370	HDLAT, Dihydrolipoamide Acetyltransferase of PDHC	3.06005	4.01525	3.54967	5.48575	5.32085	4.33771	2.9222
		JC_C100020482	HDLAT, Dihydrolipoamide Acetyltransferase of PDHC	6.22014	6.23324	6.00113	5.75328	5.43162	5.85624	4.55888
		JC_C100010381	LPD, Dihydrolipoamide Dehydrogenase of PDHC	5.09381	4.9855	4.97499	5.95954	7.11176	6.17053	3.56925
	Figure 5D Triacylglycerol assembly pathway	JC_C100008843	GPDH, ER Dihydroxyacetone-Phosphate Reductase	3.18903	3.30743	2.7845	2.73118	2.74846	1.96717	0.9855
		JC_C100004636	GPAT, ER Glycerol-Phosphate Acyltransferase	5.18943	5.64847	5.40837	5.52105	4.37086	4.04264	3.33056
		JC_C100009337	LPAAT, ER 1-Acylglycerol-Phosphate Acyltransferase	5.66021	5.98527	6.28633	5.87381	6.26885	5.54597	6.97854
		JC_C100015888	PP, ER Phosphatidate Phosphatase	4.32697	3.60999	4.30305	2.39506	0.823749	2.488	4.8748
		JC_C100008150	PP, ER Phosphatidate Phosphatase	4.68986	3.64847	4.88801	1.60407	3.22805	2.08746	-0.0144996
		JC_C100015886	PP, ER Phosphatidate Phosphatase	4.50335	6.1418	6.58782	3.97911	2.25701	2.99639	4.16752
		JC_C100010018	DAG-CPT, ER Diacylglycerol Cholinephosphotransferase	5.58376	4.79286	5.9855	4.25475	2.40871	3.39643	2.25701
		JC_C100004186	FAD2, ER Oleate Desaturase	8.74675	9.79487	9.77405	10.3997	8.61254	8.37929	7.96052
		JC_C100003840	FAH12, oleic acid hydroxylase	-0.943416	--	--	8.07146	7.99435	8.96578	3.90689
		JC_C100006612	FAD3, ER Linoleate Desaturase	5.08279	1.85997	4.88801	--	--	--	--
		JC_C100002058	DGAT, Acyl-CoA : Diacylglycerol Acyltransferase	4.32697	4.50906	5.10559	3.90111	3.74846	3.41954	4.30597
		JC_C100023807	DGAT, Acyl-CoA : Diacylglycerol Acyltransferase	7.81346	7.22381	6.9644	4.68482	3.69042	5.55643	6.54643
		JC_C100025621	PDAT, Phospholipid : Diacylglycerol Acyltransferase	4.51979	4.8268	5.29499	6.35526	5.77215	6.50875	6.62322
		JC_C100030570	PDAT, Phospholipid : Diacylglycerol Acyltransferase	0.641546	--	0.464668	3.70044	5.30159	5.66192	3.50716
		JC_C100013402	PDCT, Phosphatidylcholine:diacylglycerol cholinephosphotransferase	6.46107	5.33128	5.78398	5.88728	6.56955	6.85412	1.40054
		JC_C100017007	LPLAT (LPCAT), 1-Acylglycerol-3-Phosphocholine Acyltransferase	4.71864	5.29536	5.19889	5.04089	4.39575	3.98185	4.23189
		JC_C100001939	PLA2, Phospholipase A2	6.22014	6.04418	6.39266	5.90737	6.14466	4.33771	-0.0144996
		JC_C100012474	PLA2, Phospholipase A2	3.84197	3.57046	4.0063	3.05311	3.33342	3.27501	3.92315
	Figure 5E Oil-body protein genes	JC_C100031586	Oleosin	--	--	-0.535332	11.0917	12.6409	11.3456	9.38258
		JC_C100021590	Oleosin	-0.943416	--	--	10.8297	11.6506	11.9279	11.8146
		JC_C100018165	Oleosin	--	--	--	12.1662	14.2583	13.9013	14.0354
		JC_C100025780	Oleosin	1.96717	0.722466	1.68257	6.48123	9.79823	8.86102	12.7919
		JC_C100007324	Oleosin	4.71864	5.30743	5.38474	8.3332	7.15714	7.58856	8.22419
		JC_C100014815	Caleosin	0.0565835	-0.0144996	-0.535332	11.1651	11.0258	10.9055	8.77482
		JC_C100015337	Caleosin	3.67469	4.37782	4.06695	5.48575	5.90593	5.94251	7.28642
		JC_C100018602	Steroleosin	--	--	--	6.74578	8.05436	7.73152	6.34465
		JC_C100018603	Steroleosin	-0.943416	-0.0144996	--	4.1235	4.24184	4.62234	1.40054
		JC_C100016683	Steroleosin	--	--	--	3.0036	6.57213	6.22072	7.79688
		JC_C100018606	Steroleosin	-0.943416	--	--	2.60644	3.65076	5.12928	5.83794
		JC_C100018810	Steroleosin	--	--	--	2.53854	4.72955	7.4843	9.30574
	Figure 5F Seed storage protein genes	JC_C100029341	2S, homologues of 2S albumins	--	--	--	4.91409	9.07911	9.54691	3.07211
		JC_C100028875	2S, homologues of 2S albumins	--	--	--	--	2.7866	9.07836	3.35332
		JC_C100031127	2S, homologues of 2S albumins	--	--	--	6.08257	7.62227	13.5166	8.85353
		JC_C100032770	2S, homologues of 2S albumins	--	--	--	7.84631	9.68034	11.5423	8.66896
		JC_C100027405	2S, homologues of 2S albumins	--	--	--	6.76792	8.77278	12.2688	7.60133
		JC_C100019725	2S, homologues of 2S albumins	--	--	-1.12029	12.0297	12.5447	12.1982	4.66619
		JC_C100019724	2S, homologues of 2S albumins	--	--	--	9.12528	11.6177	14.9672	11.5663
		JC_C100034276	2S, homologues of 2S albumins	--	--	--	0.731183	4.73931	10.1093	3.66562
		JC_C100033270	11S, homologues of 11S globulins	--	--	--	8.72516	8.09598	11.3029	6.5051
		JC_C100031430	11S, homologues of 11S globulins	1.64616	-0.599462	1.04963	15.5265	16.6831	16.1693	6.97476
		JC_C100027159	11S, homologues of 11S globulins	--	--	--	7.49017	7.79533	11.6495	10.2757
		JC_C100031857	11S, homologues of 11S globulins	--	--	--	13.3984	15.4531	15.3496	7.39926
		JC_C100023371	11S, homologues of 11S globulins	--	--	-1.12029	14.591	16.2228	16.8193	9.05924
		JC_C100014944	7S, homologues of 7S globulins	--	--	-1.12029	1.60407	3.62994	5.45943	6.95187
		JC_C100026909	7S, homologues of 7S globulins	--	--	--	8.94351	12.4739	14.0573	16.3924
		JC_C100021387	7S-like, homologues of 7S-like globulins	0.641546	1.40054	1.20163	7.48575	8.15178	7.97011	7.73125
		JC_C100017633	7S-like, homologues of 7S-like globulins	7.32939	7.16199	6.37678	9.27128	9.97114	8.85044	10.3936
